# Supplementary material for: Transfusion strategies in bleeding critically ill adults: a clinical practice guideline from the European Society of Intensive Care Medicine
Source: Springer Nature journal article supplement (doi:10.1007/s00134-021-06531-x), 2021-10-22

## Supplement 1: Evidence summaries and GRADE profiles

### Transfusion strategies in bleeding critically ill adults: a clinical practice guideline from the European Society of Intensive Care Medicine.

Alexander Vlaar\* (1), Joanna C. Dionne\* (2,3,4), Sanne de Bruin(1), Marije Wijnberge (1,5), S. Jorinde Raasveld (1), Frank E.H.P.van Baarle (1), Massimo Antonelli (6,7), Cecile Aubron(8), Jacques Duranteau (9), Nicole P. Juffermans(1), Jens Meier(10), Gavin J. Murphy (11), Riccardo Abbasciano (11), Marcella Müller (1), Marcus Lance (12), Nathan D. Nielsen (13), Herbert Schöchl (14), Beverly J. Hunt (15), Gordon Gu-yatt (2,3,4), Maurizio Cecconi (16,17) and Simon Oczkowski (2,3,4)

*\*Contributed equally*

#### Affiliations

1. Department of Intensive Care Medicine, Amsterdam UMC, location AMC, Amsterdam, The Netherlands
2. Department of Medicine, McMaster University, Hamilton, Canada
3. The Guidelines in Intensive Care Development and Evaluation (GUIDE) group, the Research Institute St. Joseph's Healthcare Hamilton
4. Department of Health Research Methods, Evidence, and Impact, McMaster University, Hamilton, Canada
5. Department of Anaesthesiology, Amsterdam UMC, location AMC, Amsterdam, The Netherlands
6. Department of Anaesthesiology and Intensive Care Medicine, Fondazione Policlinico Universitario A.Gemelli IRCCS , Rome, Italy
7. Istituto di Anaesthesiology e Rianimazione Università Cattolica del Sacro Cuore, Rome Italy
8. Department of Intensive Care Medicine, Centre Hospitalier Régional et Universitaire de Brest, site La Cavale Blanche, Université de Bretagne Occidentale, Brest, France
9. Department of Anaesthesia and Intensive Care, Hôpitaux universitaires Paris Sud (HUPS).
10. Department of Anesthesiology and Critical Care Medicine, Faculty of Medicine, Kepler University, Linz, Austria
11. NIHR Leicester Biomedical Research Centre – Cardiovascular, Department of Cardiovascular Sciences, College of Life Sciences, University of Leicester, Leicester, LE3 9QP
12. Department of Anesthesiology, Intensive Care and perioperative medicine, Hamad Medical Corporation, Doha, Qatar
13. Division of Pulmonary, Critical Care, and Sleep Medicine, University of New Mexico School of Medicine
15. Thrombosis & Haemophilia Centre, Guys & St Thomas' NHS Foundation Trust
14. Department of Anaesthesiology and Intensive Care Medicine, AUVA Trauma Centre Salzburg, Academic Teaching Hospital of the Paracelsus Medical University, Salzburg, Austria and Ludwig Boltzmann Institute for Experimental and Clinical Traumatology, AUVA Trauma Research Centre, Vienna, Austria
16. Department of Anaesthesia and Intensive Care Medicine, Humanitas Clinical and Research Centre-IRCCS, Rozzano, Milan, Italy
17. Humanitas University, via Rita Levi Montalcini, Pieve Emanuele, Milan, Italy

**Evidence Summary 1: Transfusion Ratios in Massively Bleeding Critically Ill adults**

## High vs. low ratio FFP:RBC transfusion in massively bleeding patients

### 1. Massive bleeding in trauma patients

| Certainty assessment                            |                      |                          |              |                           |       | № of patients     |                   | Effect                           |                                                            | Certainty        | Importance |
|-------------------------------------------------|----------------------|--------------------------|--------------|---------------------------|-------|-------------------|-------------------|----------------------------------|------------------------------------------------------------|------------------|------------|
| № of studies                                    | Risk of bias         | Inconsistency            | Indirectness | Imprecision               | Other | High ratio        | Low ratio         | Relative (95% CI)                | Absolute (95% CI)                                          |                  |            |
| <b>Early mortality- observational studies</b>   |                      |                          |              |                           |       |                   |                   |                                  |                                                            |                  |            |
| 19 obs                                          | serious <sup>a</sup> | not serious <sup>b</sup> | not serious  | not serious               | none  | 421/2412 (17.5%)  | 946/3680 (25.7%)  | <b>RR 0.51</b><br>(0.39 to 0.65) | <b>126 fewer per 1,000</b><br>(from 157 fewer to 90 fewer) | ⊕○○○<br>VERY LOW | CRITICAL   |
| <b>30 day mortality - observational studies</b> |                      |                          |              |                           |       |                   |                   |                                  |                                                            |                  |            |
| 33 obs                                          | serious <sup>a</sup> | not serious <sup>b</sup> | not serious  | not serious               | none  | 1380/5003 (27.6%) | 2411/7108 (33.9%) | <b>RR 0.63</b><br>(0.54 to 0.73) | <b>126 fewer per 1,000</b><br>(from 156 fewer to 92 fewer) | ⊕○○○<br>VERY LOW | CRITICAL   |
| <b>24 hour mortality - RCTs</b>                 |                      |                          |              |                           |       |                   |                   |                                  |                                                            |                  |            |
| 1 RCT                                           | not serious          | not serious              | not serious  | serious <sup>c</sup>      | none  | 43/338 (12.7%)    | 58/342 (17.0%)    | <b>RR 0.75</b><br>(0.52 to 1.08) | <b>42 fewer per 1,000</b><br>(from 81 fewer to 14 more)    | ⊕⊕⊕○<br>MODERATE | CRITICAL   |
| <b>30 day mortality - RCTs</b>                  |                      |                          |              |                           |       |                   |                   |                                  |                                                            |                  |            |
| 2 RCTs                                          | not serious          | serious <sup>d</sup>     | not serious  | serious <sup>c</sup>      | none  | 88/378 (23.3%)    | 94/377 (24.9%)    | <b>RR 0.93</b><br>(0.72 to 1.20) | <b>17 fewer per 1,000</b><br>(from 70 fewer to 50 more)    | ⊕⊕○○<br>LOW      | CRITICAL   |
| <b>Stroke</b>                                   |                      |                          |              |                           |       |                   |                   |                                  |                                                            |                  |            |
| 1 RCT                                           | not serious          | not serious              | not serious  | very serious <sup>e</sup> | none  | 9/338 (2.7%)      | 11/342 (3.2%)     | <b>RR 0.83</b><br>(0.35 to 1.97) | <b>5 fewer per 1,000</b><br>(from 21 fewer to 31 more)     | ⊕⊕○○<br>LOW      | CRITICAL   |
| <b>Myocardial infarction</b>                    |                      |                          |              |                           |       |                   |                   |                                  |                                                            |                  |            |
| 1 RCT                                           | not serious          | not serious              | not serious  | very serious <sup>e</sup> | none  | 0/338 (0.0%)      | 2/342 (0.6%)      | <b>RR 0.20</b><br>(0.01 to 4.20) | <b>5 fewer per 1,000</b><br>(from 6 fewer to 19 more)      | ⊕⊕○○<br>LOW      | CRITICAL   |
| <b>ARDS/TRALI</b>                               |                      |                          |              |                           |       |                   |                   |                                  |                                                            |                  |            |

## High vs. low ratio FFP:RBC transfusion in massively bleeding patients

|                                           |                      |                      |             |                           |      |                    |                    |                                   |                                                            |                  |           |
|-------------------------------------------|----------------------|----------------------|-------------|---------------------------|------|--------------------|--------------------|-----------------------------------|------------------------------------------------------------|------------------|-----------|
| 1 RCT                                     | not serious          | not serious          | not serious | serious <sup>c</sup>      | none | 56/338<br>(16.6%)  | 66/342<br>(19.3%)  | <b>RR 0.86</b><br>(0.62 to 1.19)  | <b>27 fewer per 1,000</b><br>(from 73 fewer to 37 more)    | ⊕⊕⊕○<br>MODERATE | CRITICAL  |
| <b>TACO/CHF</b>                           |                      |                      |             |                           |      |                    |                    |                                   |                                                            |                  |           |
| 1 RCT                                     | not serious          | not serious          | not serious | very serious <sup>e</sup> | none | 1/338<br>(0.3%)    | 0/342<br>(0.0%)    | <b>RR 3.04</b><br>(0.12 to 74.25) | <b>0 fewer per 1,000</b><br>(from 0 fewer to 0 fewer)      | ⊕⊕○○<br>LOW      | IMPORTANT |
| <b>Infections/Sepsis</b>                  |                      |                      |             |                           |      |                    |                    |                                   |                                                            |                  |           |
| 1 RCT                                     | not serious          | not serious          | not serious | serious <sup>c</sup>      | none | 155/338<br>(45.9%) | 146/342<br>(42.7%) | <b>RR 1.07</b><br>(0.91 to 1.27)  | <b>30 more per 1,000</b><br>(from 38 fewer to 115 more)    | ⊕⊕⊕○<br>MODERATE | IMPORTANT |
| <b>Venous thromboembolism</b>             |                      |                      |             |                           |      |                    |                    |                                   |                                                            |                  |           |
| 1 RCT                                     | not serious          | not serious          | not serious | serious <sup>c</sup>      | none | 42/338<br>(12.4%)  | 37/342<br>(10.8%)  | <b>RR 1.15</b><br>(0.76 to 1.74)  | <b>16 more per 1,000</b><br>(from 26 fewer to 80 more)     | ⊕⊕⊕○<br>MODERATE | IMPORTANT |
| <b>Clinical hemostasis -exanguination</b> |                      |                      |             |                           |      |                    |                    |                                   |                                                            |                  |           |
| 2 RCTs                                    | serious <sup>f</sup> | serious <sup>d</sup> | not serious | not serious               | none | 320/375<br>(85.3%) | 296/374<br>(79.1%) | <b>RR 0.70</b><br>(0.51 to 0.96)  | <b>237 fewer per 1,000</b><br>(from 388 fewer to 32 fewer) | ⊕⊕○○<br>LOW      | IMPORTANT |

CI: Confidence interval; RR: Risk ratio; MD: Mean difference

### Explanations

- Many studies included patients who died very early, before plasma may have been available, resulting in confounding.
- Though I<sup>2</sup> values are high, indicating statistical heterogeneity, it is of questionable clinical significance as virtually all studies favour high ratio transfusion.
- Wide confidence intervals which do not exclude significant benefit nor harm.
- Significant statistical heterogeneity (I<sup>2</sup> >70%) with studies demonstrating serious inconsistency of unequivocal clinical importance.
- Very wide confidence intervals resulting in very serious imprecision.
- Risk of bias in determining number of patients who had clinical hemostasis



## High vs. low ratio FFP:RBC transfusion in massively bleeding patients

### 2. Massive bleeding in non-trauma patients

| Certainty assessment                            |                          |                      |              |                           |       | No of patients  |                 | Effect                           |                                                         | Certainty        | Importance |
|-------------------------------------------------|--------------------------|----------------------|--------------|---------------------------|-------|-----------------|-----------------|----------------------------------|---------------------------------------------------------|------------------|------------|
| No of studies                                   | Risk of bias             | Inconsistency        | Indirectness | Imprecision               | Other | High ratio      | Low ratio       | Relative (95% CI)                | Absolute (95% CI)                                       |                  |            |
| <b>Mortality - Mixed population</b>             |                          |                      |              |                           |       |                 |                 |                                  |                                                         |                  |            |
| 2 obs                                           | not serious <sup>a</sup> | not serious          | not serious  | serious <sup>b</sup>      | none  | 121/437 (27.7%) | 91/316 (28.8%)  | <b>RR 0.96</b><br>(0.76 to 1.21) | <b>12 fewer per 1,000</b><br>(from 69 fewer to 60 more) | ⊕○○○<br>VERY LOW | CRITICAL   |
| <b>Mortality - Cardiac and vascular surgery</b> |                          |                      |              |                           |       |                 |                 |                                  |                                                         |                  |            |
| 3 obs                                           | serious <sup>c</sup>     | serious <sup>d</sup> | not serious  | serious <sup>b</sup>      | none  | 85/471 (18.0%)  | 149/758 (19.7%) | <b>RR 0.92</b><br>(0.73 to 1.16) | <b>16 fewer per 1,000</b><br>(from 53 fewer to 31 more) | ⊕○○○<br>VERY LOW | CRITICAL   |
| <b>Mortality - Obstetric</b>                    |                          |                      |              |                           |       |                 |                 |                                  |                                                         |                  |            |
| 2 obs                                           | not serious              | not serious          | not serious  | very serious <sup>e</sup> | none  | 0/141 (0.0%)    | 0/152 (0.0%)    | not pooled                       | see comment                                             | -                | CRITICAL   |

CI: Confidence interval; RR: Risk ratio; MD: Mean difference

#### Explanations

- Largest study (Etchill 2017) excluded patients who died within one hour, possibly reducing the effect of survivorship bias.
- Wide confidence intervals which do not exclude significant benefit nor harm.
- Many studies included patients who died very early, before plasma may have been available, resulting in confounding.
- Significant statistical heterogeneity ( $I^2 > 70\%$ ) with studies demonstrating serious inconsistency of unequivocal clinical importance.
- No events reported resulting in very serious imprecision; overall certainty not rated

## High vs. low ratio FFP:RBC transfusion in massively bleeding patients

### 1. a) Early mortality (24-48 hours), trauma patients, RCTS

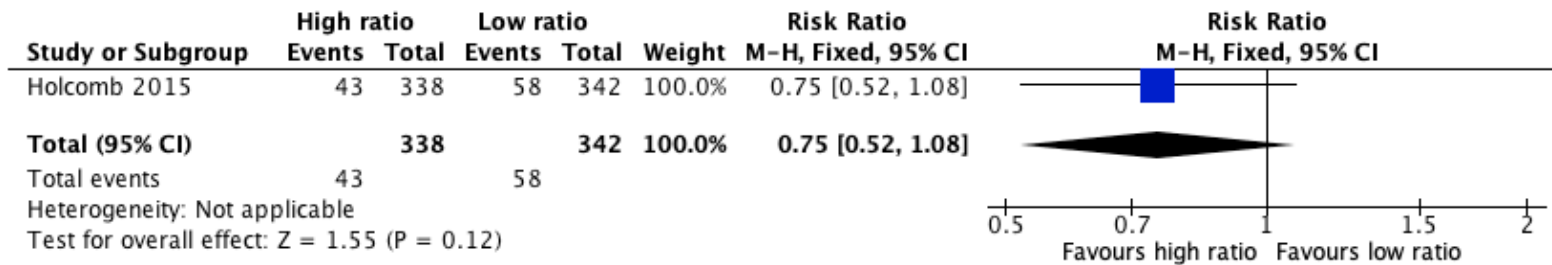

### b) Late mortality (28-30 days, hospital mortality), trauma patients, RCTs

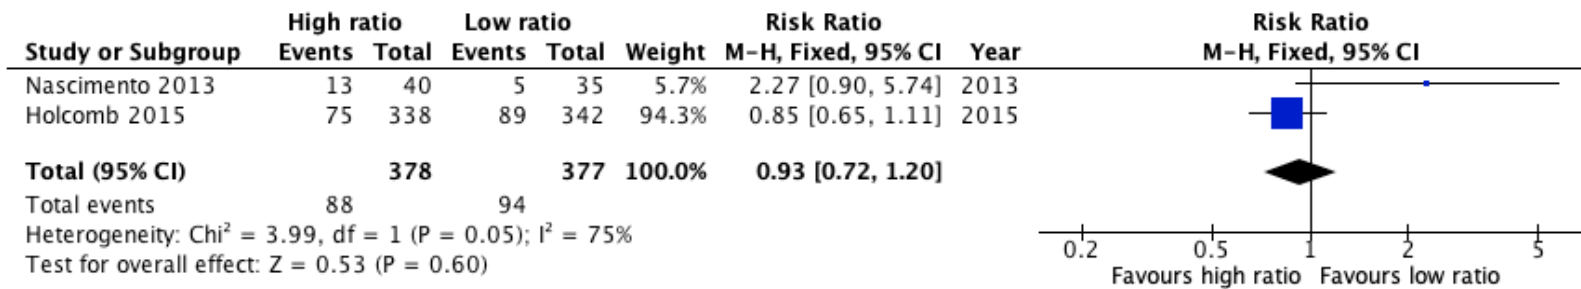

## High vs. low ratio FFP:RBC transfusion in massively bleeding patients

### 2. a) Early mortality (24-48 hours), trauma patients, observational studies

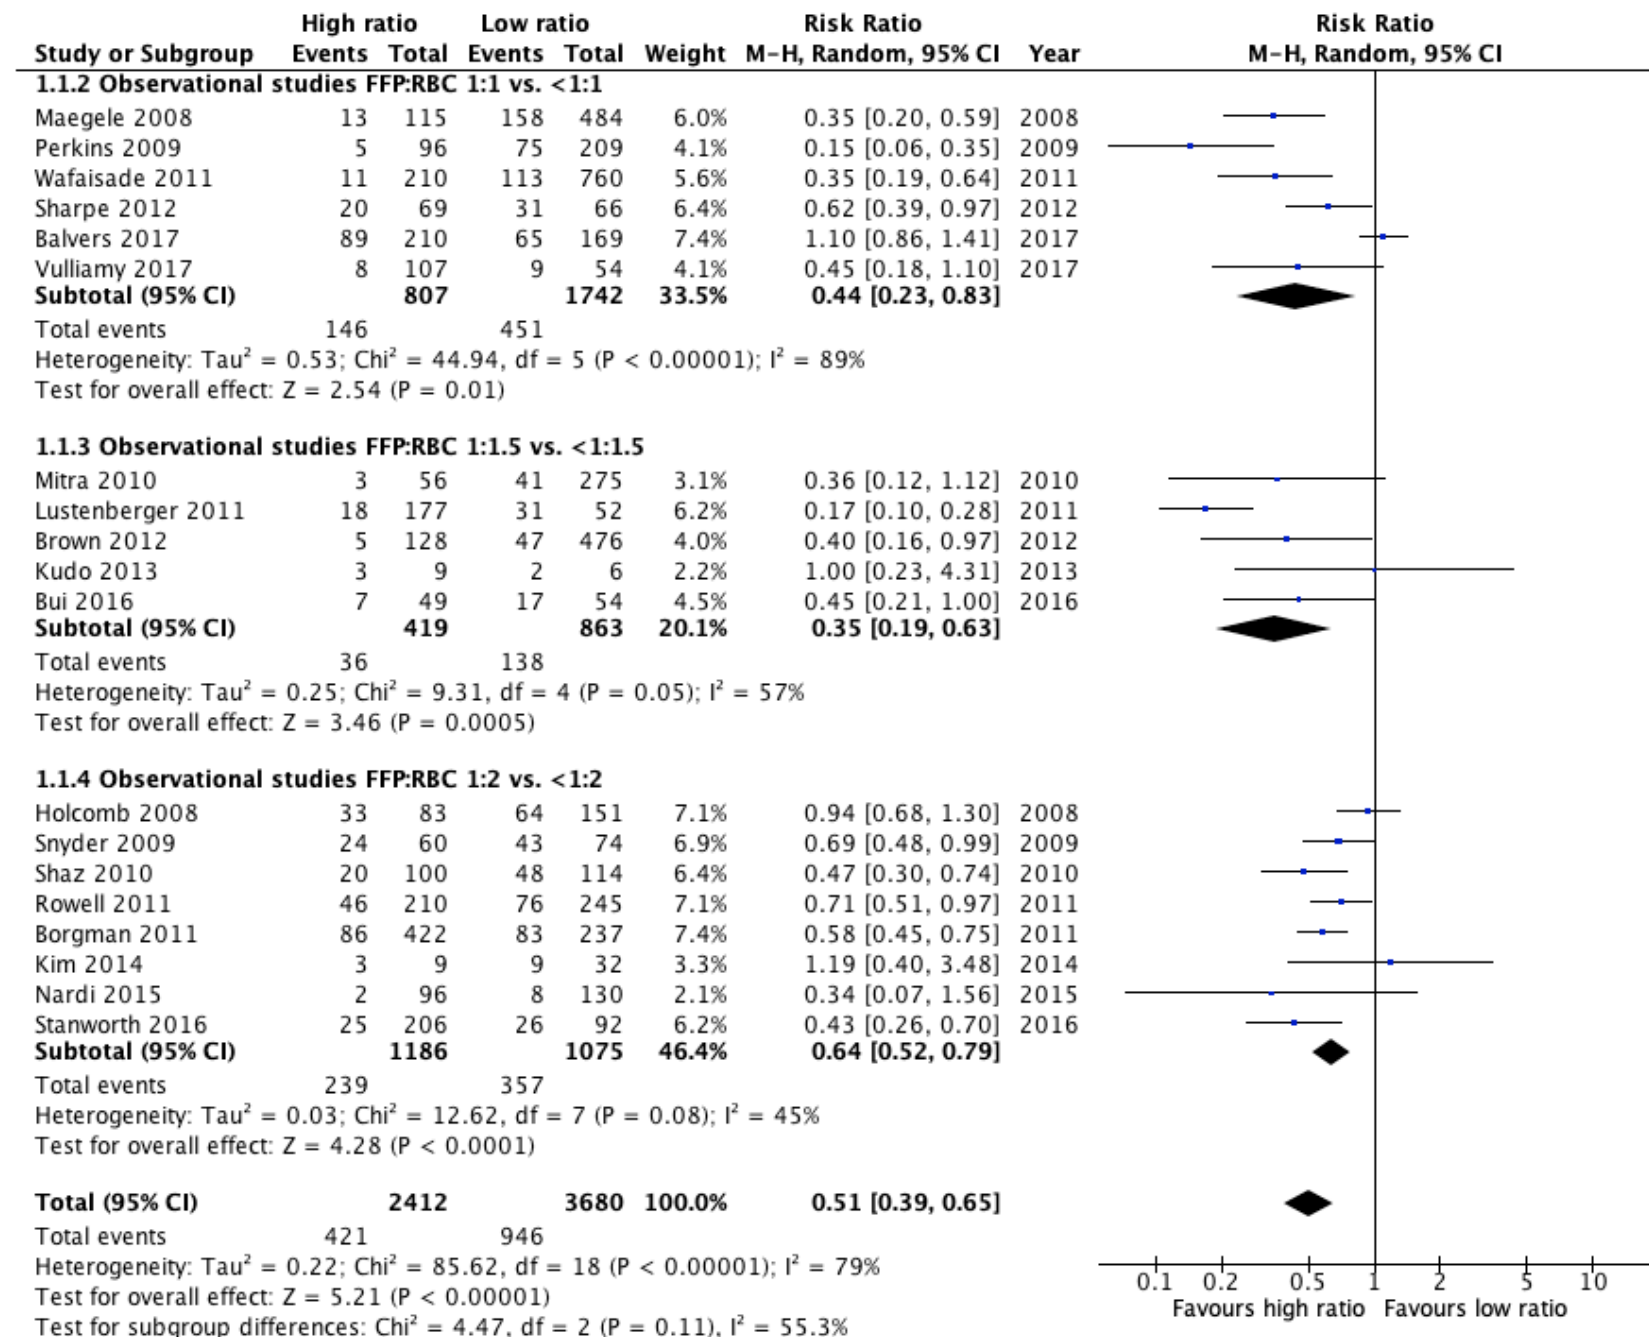

## High vs. low ratio FFP:RBC transfusion in massively bleeding patients

### b) Late mortality (28-30 days, hospital mortality), trauma patients, observational studies

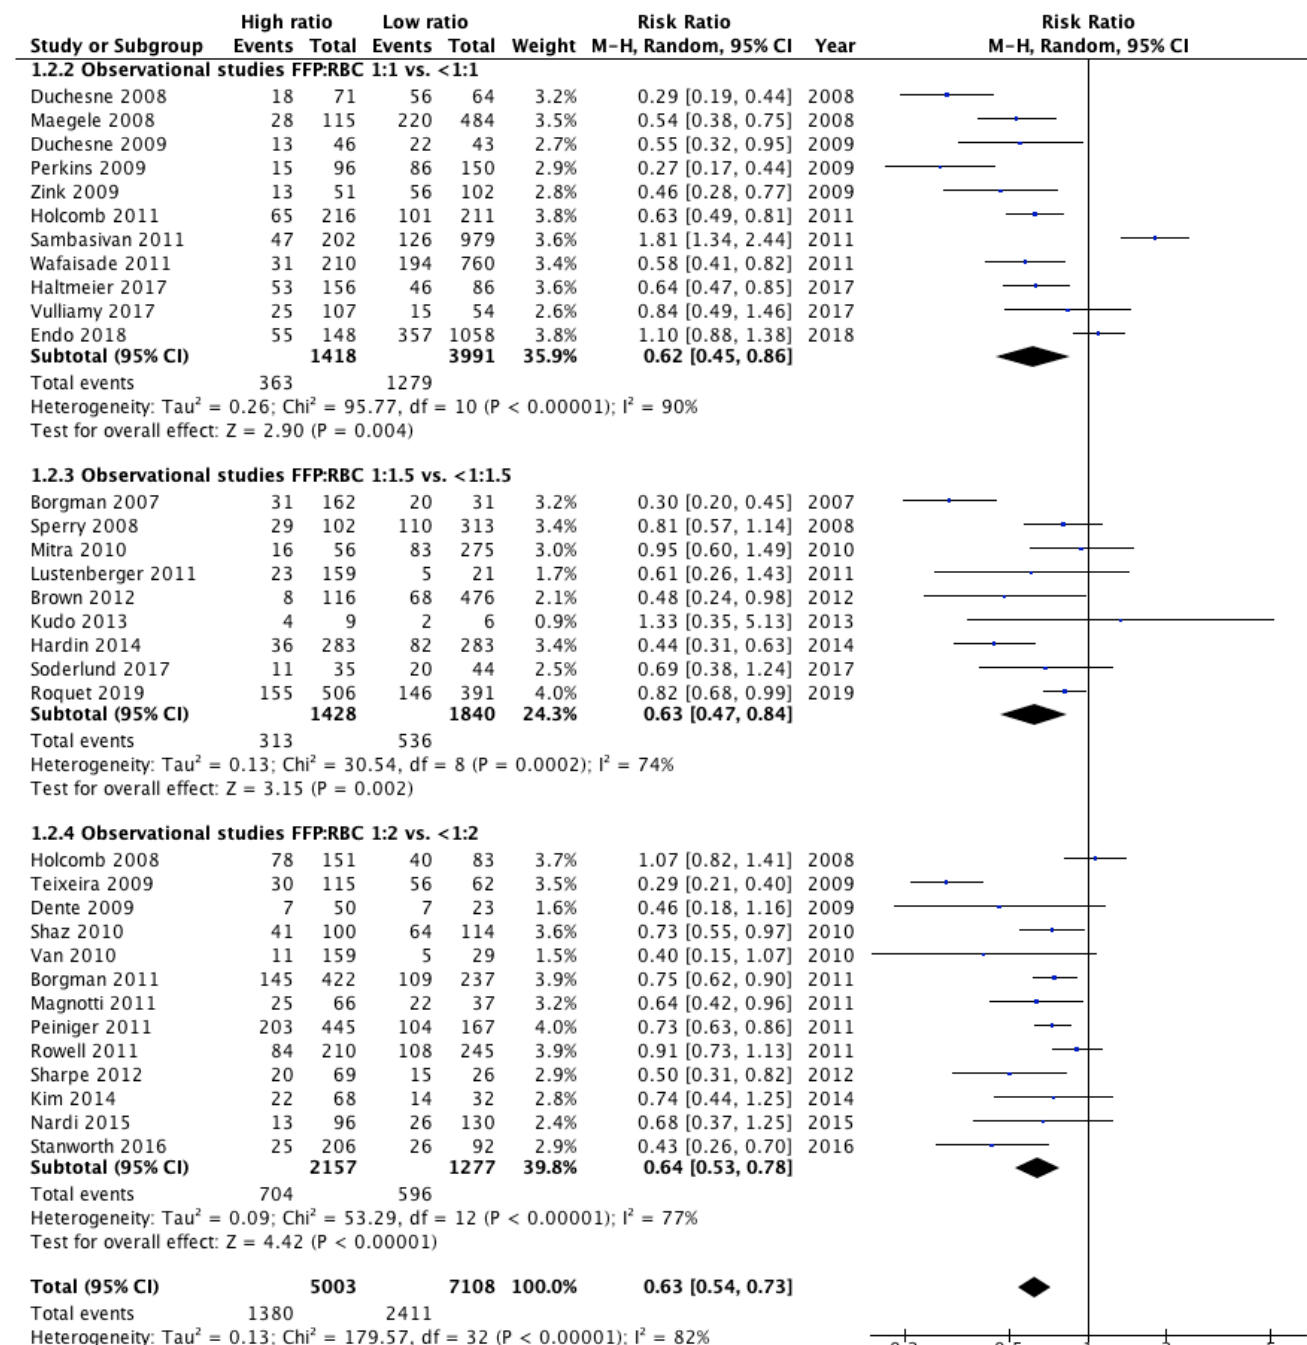

## High vs. low ratio FFP:RBC transfusion in massively bleeding patients

### 3. Late mortality (28-30 days, hospital mortality), non-trauma patients, observational studies

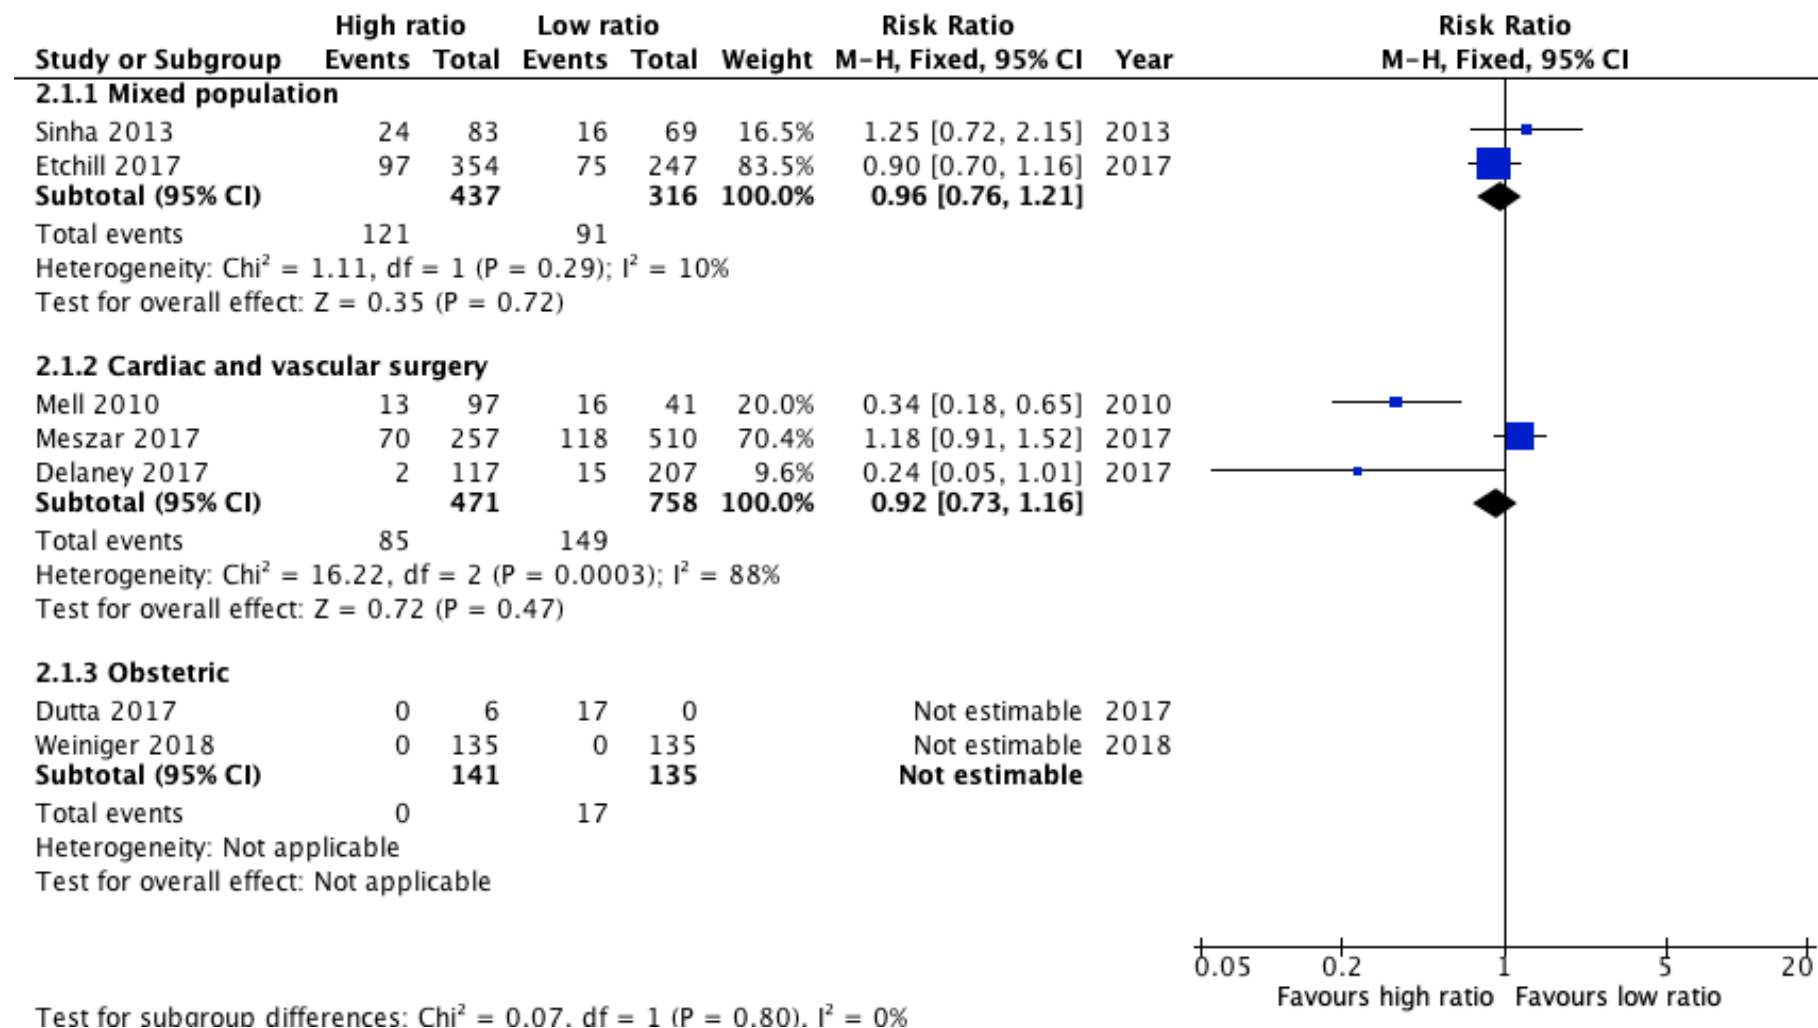

## High vs. low ratio FFP:RBC transfusion in massively bleeding patients

### 3. Stroke, trauma patients, RCTs

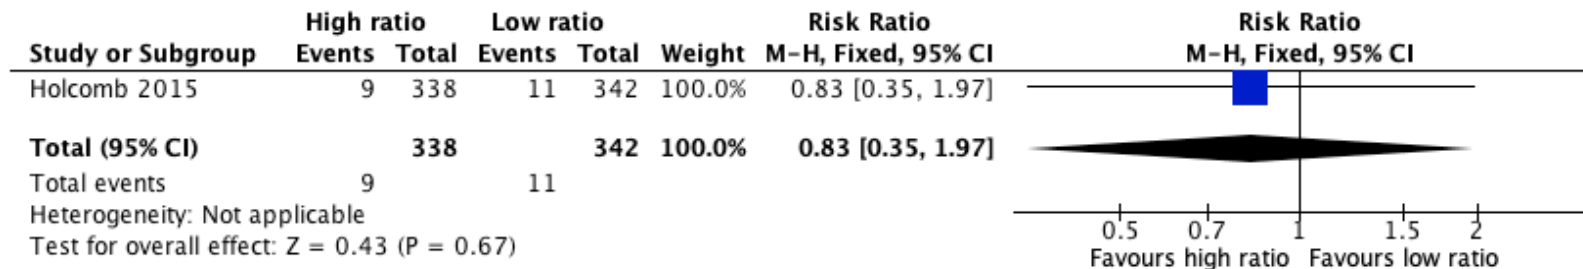

### 4. Myocardial infarction, trauma patients, RCTs

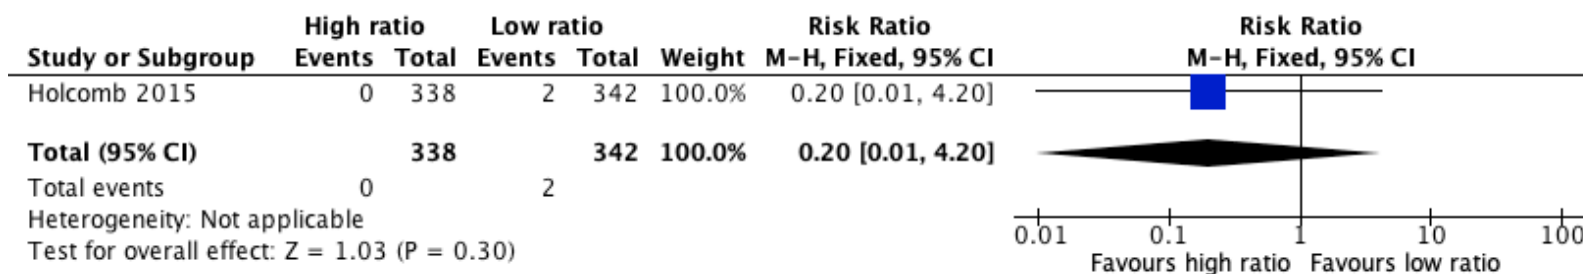

### 5. ARDS/TRALI, trauma patients, RCTs

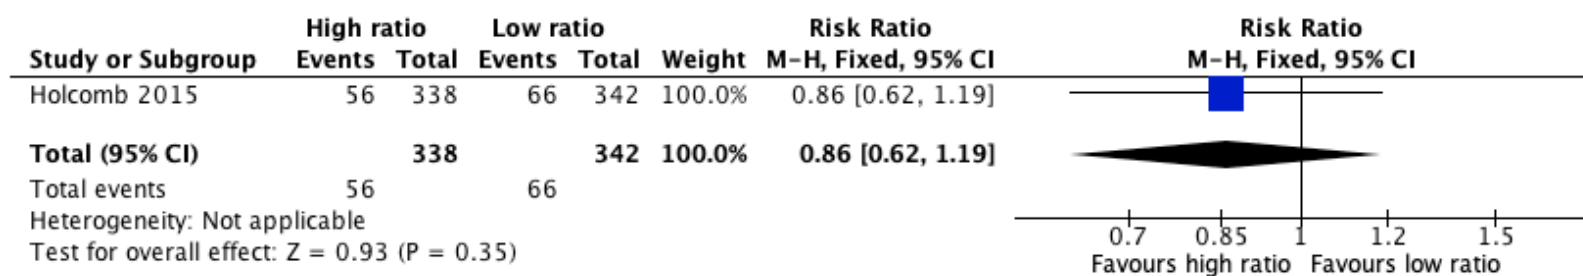

## High vs. low ratio FFP:RBC transfusion in massively bleeding patients

### 6. TACO/CHF, trauma patients, RCTs

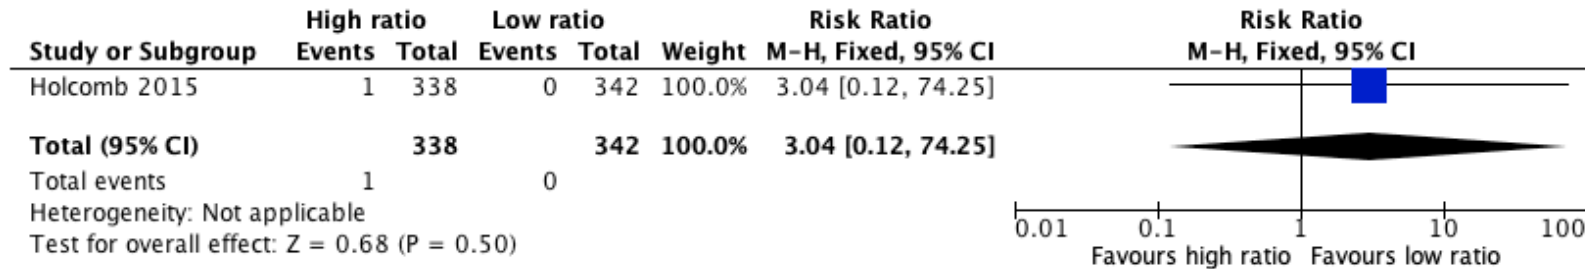

### 7. Infections/sepsis, trauma patients, RCTs

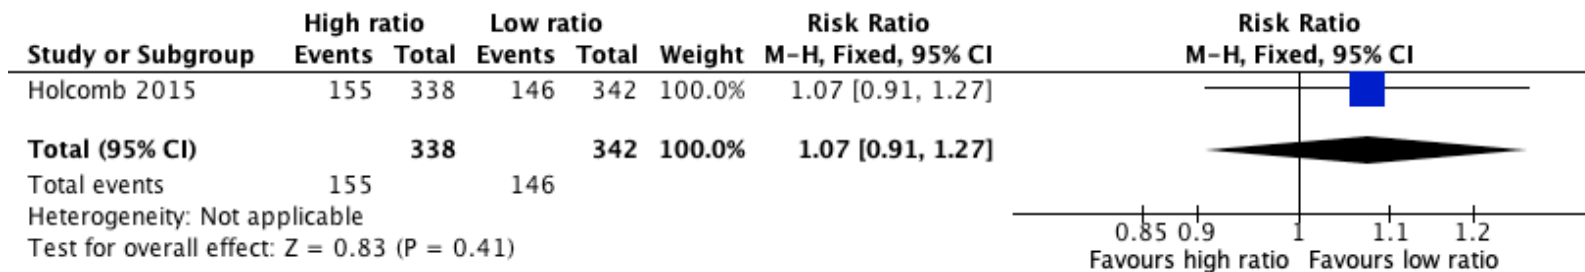

### 8. Venous thromboembolism, trauma patients, RCTs

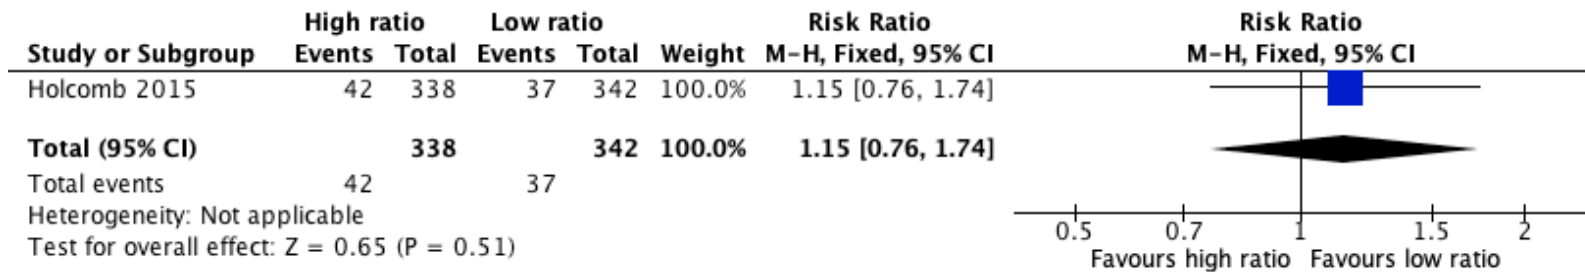

## High vs. low ratio FFP:RBC transfusion in massively bleeding patients

### 9. Clinical hemostasis, trauma patients, RCTs

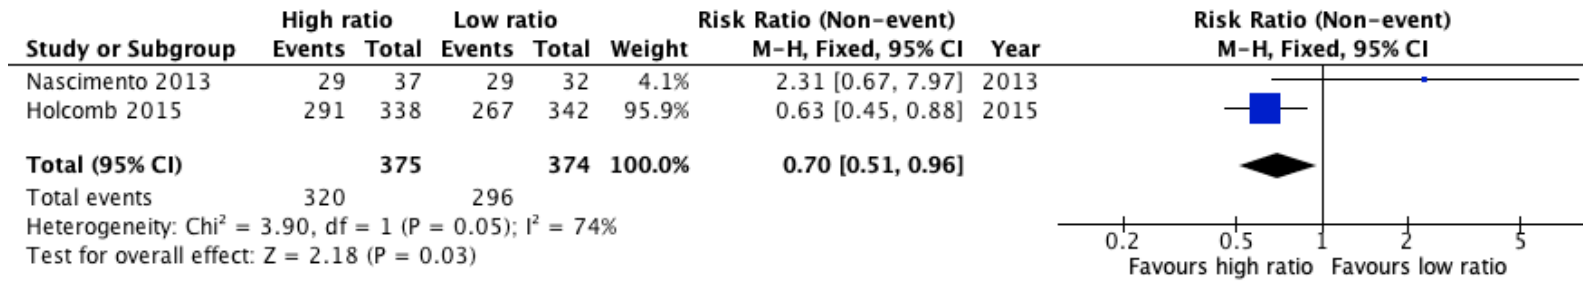



**Evidence Summary 2: Cold-stored platelets in massively bleeding, critically ill adults**

## Cold stored platelets in critically ill bleeding patients

| Certainty assessment                                 |                      |               |              |                           |       | No of patients  |                   | Effect                           |                                                            | Certainty        | Importance |
|------------------------------------------------------|----------------------|---------------|--------------|---------------------------|-------|-----------------|-------------------|----------------------------------|------------------------------------------------------------|------------------|------------|
| No of studies                                        | Risk of bias         | Inconsistency | Indirectness | Imprecision               | Other | Cold platelets  | Regular platelets | Relative (95% CI)                | Absolute (95% CI)                                          |                  |            |
| <b>Mortality - Cryopreserved platelets</b>           |                      |               |              |                           |       |                 |                   |                                  |                                                            |                  |            |
| 1 RCT                                                | serious <sup>a</sup> | not serious   | not serious  | very serious <sup>b</sup> | none  | 7/25<br>(28.0%) | 4/19<br>(21.1%)   | <b>RR 1.33</b><br>(0.45 to 3.89) | <b>69 more per 1,000</b><br>(from 116 fewer to 608 more)   | ⊕○○○<br>VERY LOW | CRITICAL   |
| <b>Bleeding - Cold-stored platelets</b>              |                      |               |              |                           |       |                 |                   |                                  |                                                            |                  |            |
| 1 RCT                                                | serious <sup>a</sup> | not serious   | not serious  | very serious <sup>b</sup> | none  | 17              | 22                | -                                | <b>MD 274 lower</b><br>(327.99 lower to 220.01 lower)      | ⊕○○○<br>VERY LOW | IMPORTANT  |
| <b>Thromboembolic events - Cold-stored platelets</b> |                      |               |              |                           |       |                 |                   |                                  |                                                            |                  |            |
| 1 RCT                                                | serious <sup>a</sup> | not serious   | not serious  | very serious <sup>b</sup> | none  | 3/17<br>(17.6%) | 7/22<br>(31.8%)   | <b>RR 0.55</b><br>(0.17 to 1.83) | <b>143 fewer per 1,000</b><br>(from 264 fewer to 264 more) | ⊕○○○<br>VERY LOW | IMPORTANT  |
| <b>RBCs transfused - Cold-stored platelets</b>       |                      |               |              |                           |       |                 |                   |                                  |                                                            |                  |            |
| 1 RCT                                                | serious <sup>a</sup> | not serious   | not serious  | very serious <sup>b</sup> | none  | 17              | 22                | -                                | <b>MD 0.5 lower</b><br>(1.03 lower to 0.03 higher)         | ⊕○○○<br>VERY LOW | IMPORTANT  |
| <b>Plasma transfused - Cold-stored platelets</b>     |                      |               |              |                           |       |                 |                   |                                  |                                                            |                  |            |
| 1 RCT                                                | serious <sup>a</sup> | not serious   | not serious  | very serious <sup>b</sup> | none  | 17              | 22                | -                                | <b>MD 1.8 lower</b><br>(2.43 lower to 1.17 lower)          | ⊕○○○<br>VERY LOW | IMPORTANT  |
| <b>Platelets transfused - Cold-stored platelets</b>  |                      |               |              |                           |       |                 |                   |                                  |                                                            |                  |            |
| 1 RCT                                                | serious <sup>a</sup> | not serious   | not serious  | very serious <sup>b</sup> | none  | 17              | 22                | -                                | <b>MD 0.2 lower</b><br>(0.3 lower to 0.1 lower)            | ⊕○○○<br>VERY LOW | IMPORTANT  |

CI: Confidence interval; RR: Risk ratio; MD: Mean difference

### Explanations

- a. Methods of studies are poorly reported. Due to the absence of clear methods and protocols, we judge the studies to be at high risk of bias, particularly selective reporting.  
b. Very small number of patients included in single study, resulting in very serious imprecision.

## Cold stored platelets in critically ill bleeding patients

### 1. Mortality - cryopreserved platelets

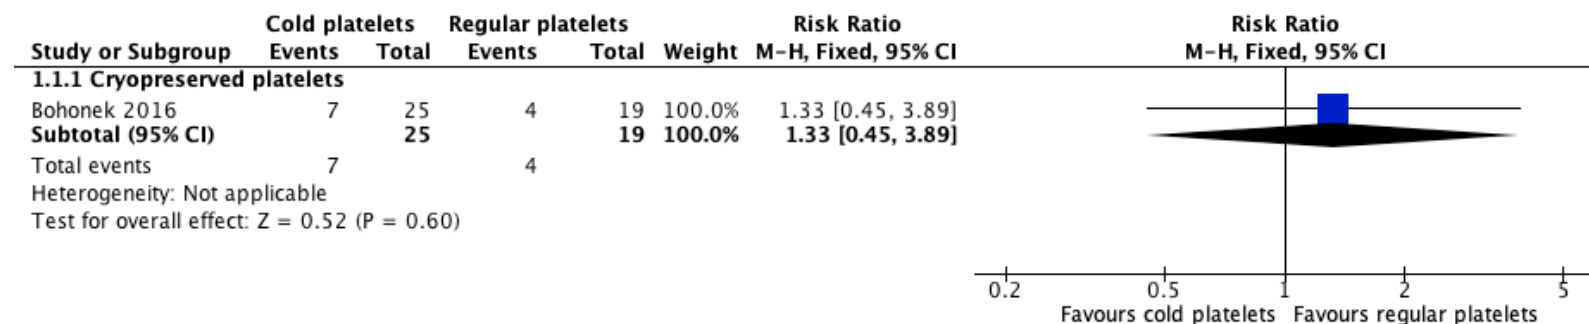

### 2. Bleeding - cold-stored platelets

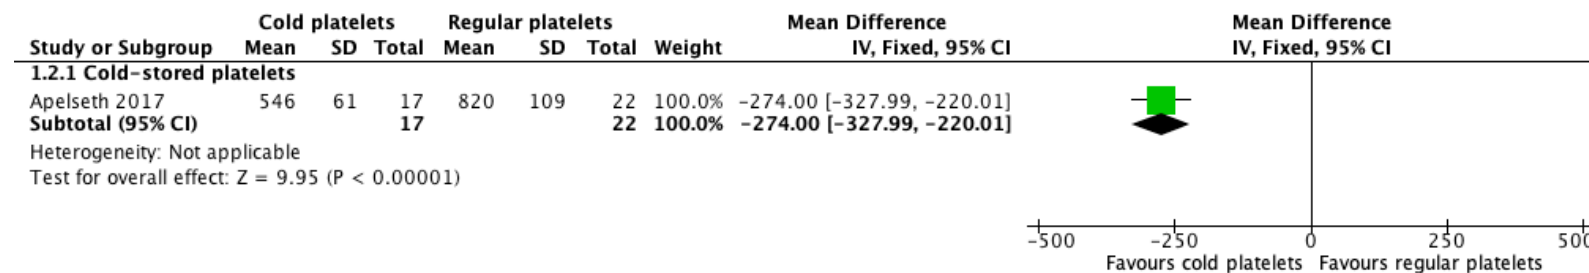

### 3. Thromboembolic events - cold-stored platelets

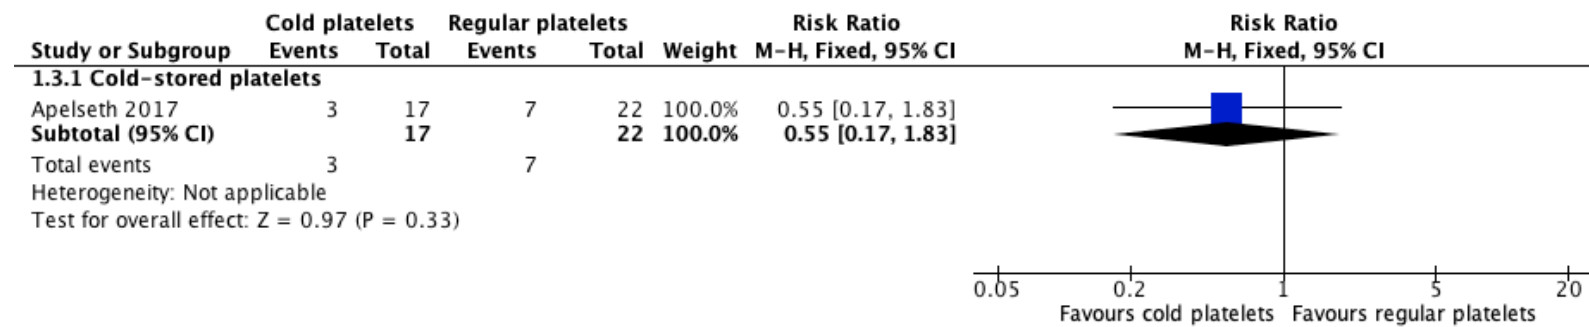

## Cold stored platelets in critically ill bleeding patients

### 4. RBCs transfused - cold-stored platelets

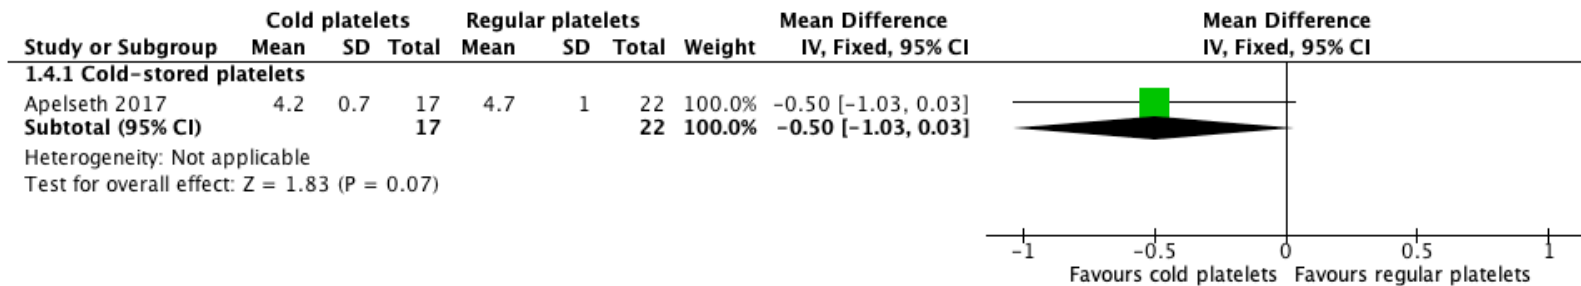

### 5. Plasma transfused - cold-stored platelets

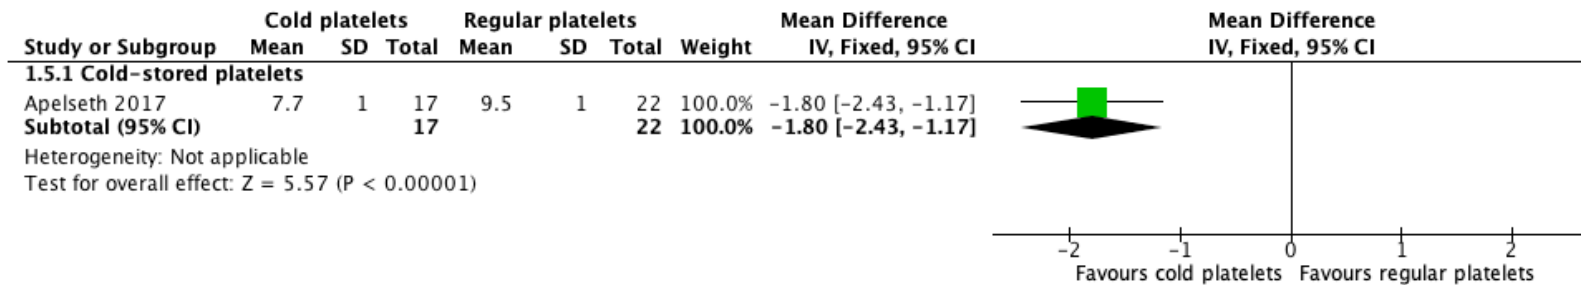

### 6. Platelets transfused - cold-stored platelets

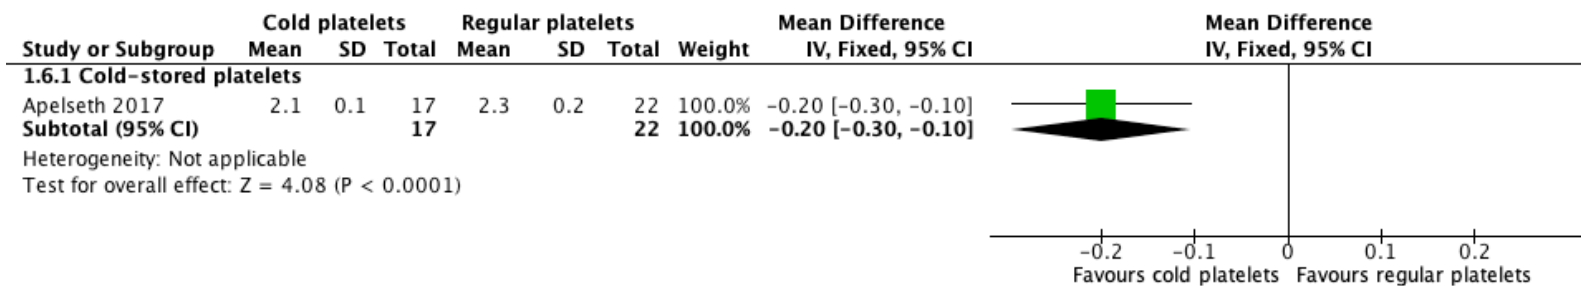

**Evidence Summary 3: Prothrombin complex vs. fresh frozen plasma in massively bleeding, critically ill adults**

## PCC vs. FFP in massively bleeding patients

### Cardiac Surgery

#### ETD Cardiac Surgery

| Certainty assessment                   |                       |                      |                      |              |                           |                      | № of patients                                 |                 | Effect                           |                                                            | Certainty        | Importance |
|----------------------------------------|-----------------------|----------------------|----------------------|--------------|---------------------------|----------------------|-----------------------------------------------|-----------------|----------------------------------|------------------------------------------------------------|------------------|------------|
| № of studies                           | Study design          | Risk of bias         | Inconsistency        | Indirectness | Imprecision               | Other considerations | Massive Transfusion Protocol with Prothrombin | plasma          | Relative (95% CI)                | Absolute (95% CI)                                          |                  |            |
| <b>Cardiac Surgery- Mortality</b>      |                       |                      |                      |              |                           |                      |                                               |                 |                                  |                                                            |                  |            |
| 5                                      | observational studies | serious <sup>a</sup> | not serious          | not serious  | very serious <sup>b</sup> | none <sup>c</sup>    | 47/539 (8.7%)                                 | 44/524 (8.4%)   | <b>RR 1.05</b><br>(0.71 to 1.56) | <b>4 more per 1,000</b><br>(from 24 fewer to 47 more)      | ⊕○○○<br>VERY LOW | CRITICAL   |
| <b>Cardiac Surgery - Stroke</b>        |                       |                      |                      |              |                           |                      |                                               |                 |                                  |                                                            |                  |            |
| 5                                      | observational studies | serious <sup>a</sup> | serious <sup>d</sup> | not serious  | serious <sup>b</sup>      | none <sup>c</sup>    | 27/539 (5.0%)                                 | 22/524 (4.2%)   | <b>RR 1.20</b><br>(0.70 to 2.05) | <b>8 more per 1,000</b><br>(from 13 fewer to 44 more)      | ⊕○○○<br>VERY LOW | CRITICAL   |
| <b>Cardiac Surgery- Reoperation</b>    |                       |                      |                      |              |                           |                      |                                               |                 |                                  |                                                            |                  |            |
| 4                                      | observational studies | serious <sup>a</sup> | not serious          | not serious  | serious <sup>e</sup>      | none <sup>c</sup>    | 88/512 (17.2%)                                | 151/784 (19.3%) | <b>RR 0.86</b><br>(0.67 to 1.11) | <b>27 fewer per 1,000</b><br>(from 64 fewer to 21 more)    | ⊕○○○<br>VERY LOW | IMPORTANT  |
| <b>Cardiac Surgery-RRT</b>             |                       |                      |                      |              |                           |                      |                                               |                 |                                  |                                                            |                  |            |
| 2                                      | observational studies | serious <sup>a</sup> | not serious          | not serious  | very serious <sup>b</sup> | none <sup>c</sup>    | 15/270 (5.6%)                                 | 7/280 (2.5%)    | <b>RR 2.34</b><br>(0.98 to 5.60) | <b>33 more per 1,000</b><br>(from 1 fewer to 115 more)     | ⊕○○○<br>VERY LOW | IMPORTANT  |
| <b>Cardiac Surgery-RBC transfusion</b> |                       |                      |                      |              |                           |                      |                                               |                 |                                  |                                                            |                  |            |
| 4                                      | observational studies | serious <sup>a</sup> | not serious          | not serious  | not serious               | none <sup>c</sup>    | 381/488 (78.1%)                               | 442/498 (88.8%) | <b>RR 0.88</b><br>(0.83 to 0.93) | <b>107 fewer per 1,000</b><br>(from 151 fewer to 62 fewer) | ⊕○○○<br>VERY LOW | IMPORTANT  |

| Certainty assessment                                  |                       |                      |                      |              |                           |                      | № of patients                                 |        | Effect            |                                                | Certainty        | Importance |
|-------------------------------------------------------|-----------------------|----------------------|----------------------|--------------|---------------------------|----------------------|-----------------------------------------------|--------|-------------------|------------------------------------------------|------------------|------------|
| № of studies                                          | Study design          | Risk of bias         | Inconsistency        | Indirectness | Imprecision               | Other considerations | Massive Transfusion Protocol with Prothrombin | plasma | Relative (95% CI) | Absolute (95% CI)                              |                  |            |
| <b>Cardiac Surgery- RBC units transfused</b>          |                       |                      |                      |              |                           |                      |                                               |        |                   |                                                |                  |            |
| 4                                                     | observational studies | serious <sup>a</sup> | serious              | not serious  | serious <sup>e</sup>      | none <sup>c</sup>    | 422                                           | 407    | -                 | MD 1.16 lower (1.59 lower to 0.73 lower)       | ⊕○○○<br>VERY LOW | IMPORTANT  |
| <b>Cardiac Surgery- Chest Drain output (24 hours)</b> |                       |                      |                      |              |                           |                      |                                               |        |                   |                                                |                  |            |
| 2                                                     | observational studies | serious <sup>a</sup> | serious <sup>d</sup> | not serious  | very serious <sup>b</sup> | none <sup>c</sup>    | 276                                           | 251    | -                 | MD 72.88 higher (75.87 lower to 221.64 higher) | ⊕○○○<br>VERY LOW | IMPORTANT  |
| <b>Cardiac Surgery- ICU LOS- Hours</b>                |                       |                      |                      |              |                           |                      |                                               |        |                   |                                                |                  |            |
| 1                                                     | observational studies | serious <sup>a</sup> | not serious          | not serious  | very serious              | none <sup>c</sup>    | 225                                           | 225    | -                 | MD 18 lower (43.14 lower to 7.14 higher)       | ⊕○○○<br>VERY LOW | IMPORTANT  |
| <b>Cardiac Surgery-Hospital LOS (Days)</b>            |                       |                      |                      |              |                           |                      |                                               |        |                   |                                                |                  |            |
| 1                                                     | observational studies | serious <sup>a</sup> | not serious          | not serious  | very serious <sup>b</sup> |                      | 225                                           | 225    | -                 | MD 2.7 lower (4.68 lower to 0.72 lower)        | -                | IMPORTANT  |

CI: Confidence interval; RR: Risk ratio; MD: Mean difference

## Explanations

- a. Studies included were at a high risk of bias. The majority of studies were retrospective cohorts.
- b. Rated down for imprecision due to wide confidence intervals and small number of events.
- c. Could not formally assess for publication bias due to small number of studies.
- d. Rated down for significant heterogeneity with point estimates on both sides of the line of no effect.
- e. Rated down for imprecision due to wide confidence intervals.

## Mortality

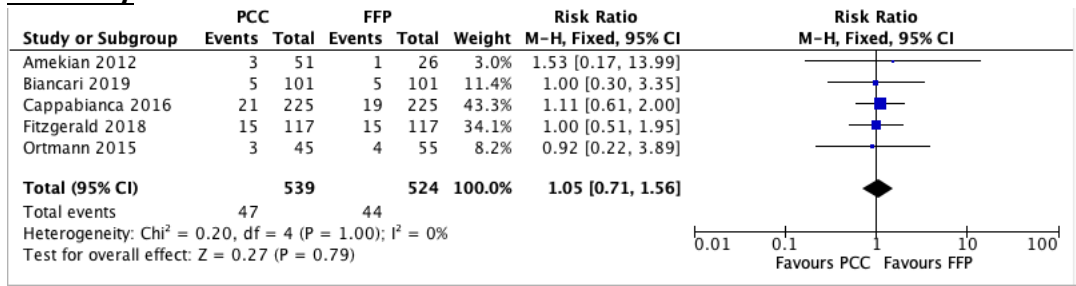

## Reoperation

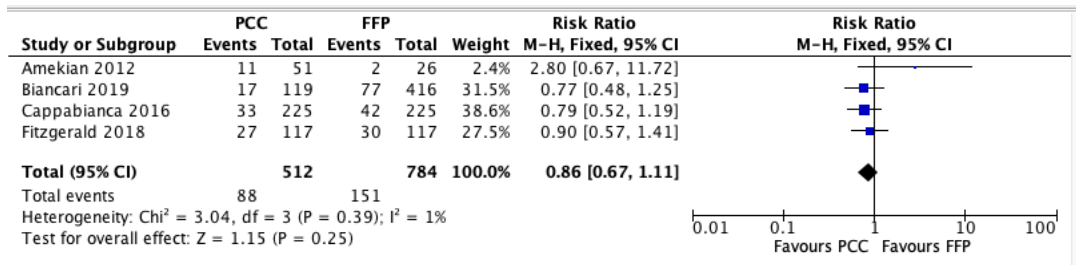

## Stroke

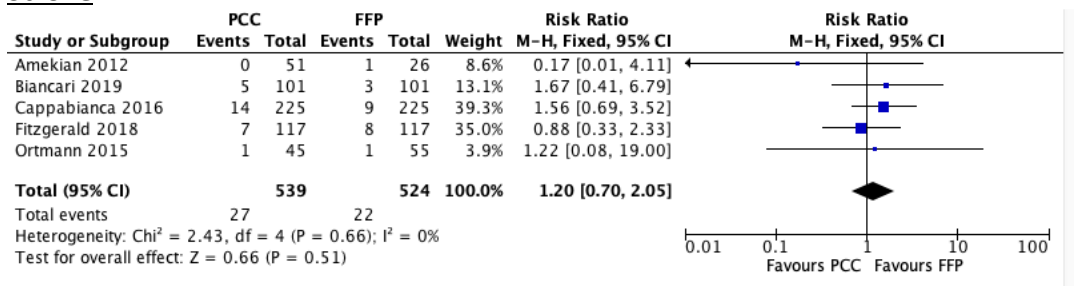

## RRT



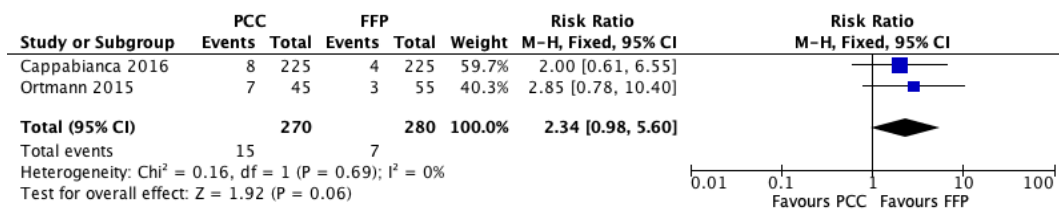

### RBC Transfusion

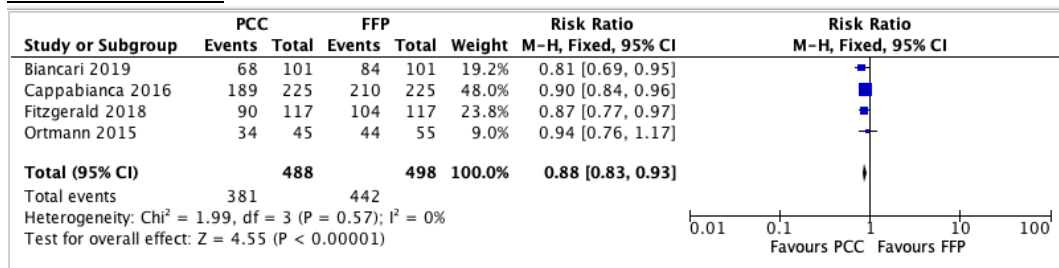

### RBC Transfusion Units

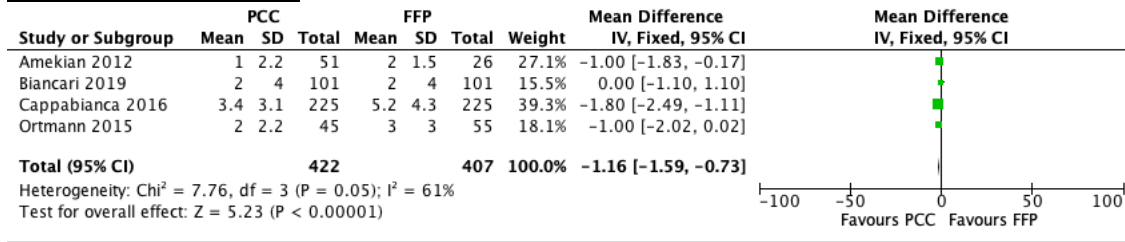

### Chest tube output in 24 hours

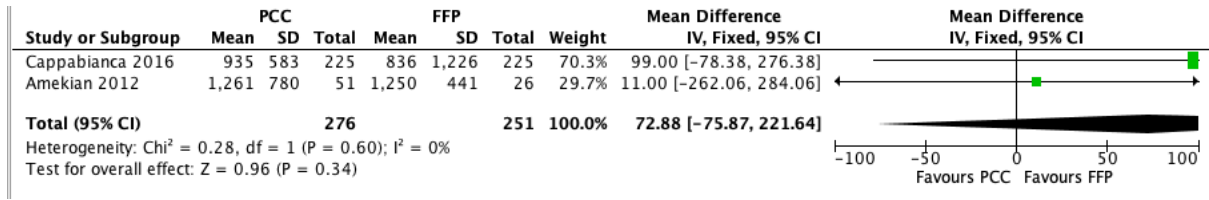

### LOS-ICU (hours)

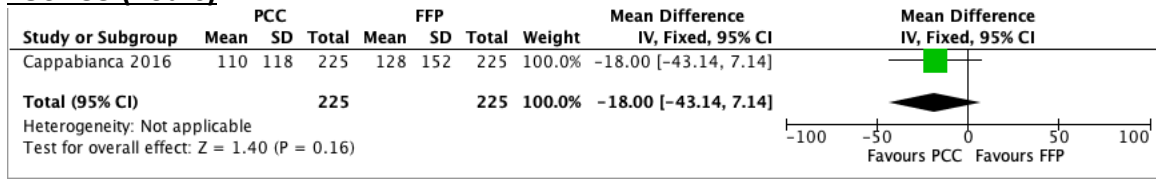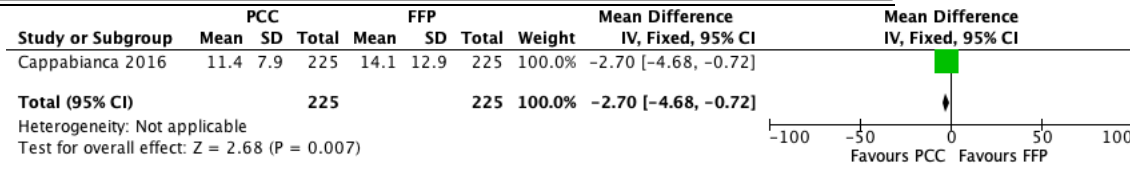

### LOS- Hospital (Days)

## Trauma

### Trauma ETD

| Certainty assessment              |                       |                      |                      |                      |                           |                      | No of patients                                |                  | Effect                           |                                                          | Certainty        | Importance |
|-----------------------------------|-----------------------|----------------------|----------------------|----------------------|---------------------------|----------------------|-----------------------------------------------|------------------|----------------------------------|----------------------------------------------------------|------------------|------------|
| No of studies                     | Study design          | Risk of bias         | Inconsistency        | Indirectness         | Imprecision               | Other considerations | Massive Transfusion Protocol with Prothrombin | plasma           | Relative (95% CI)                | Absolute (95% CI)                                        |                  |            |
| <b>Trauma- Mortality</b>          |                       |                      |                      |                      |                           |                      |                                               |                  |                                  |                                                          |                  |            |
| 6                                 | observational studies | serious <sup>a</sup> | not serious          | not serious          | not serious               | none <sup>c</sup>    | 83/462 (18.0%)                                | 241/1175 (20.5%) | <b>RR 0.73</b><br>(0.58 to 0.92) | <b>55 fewer per 1,000</b><br>(from 86 fewer to 16 fewer) | ⊕○○○<br>VERY LOW | CRITICAL   |
| <b>Trauma- DVT</b>                |                       |                      |                      |                      |                           |                      |                                               |                  |                                  |                                                          |                  |            |
| 4                                 | observational studies | serious <sup>a</sup> | serious <sup>d</sup> | serious <sup>e</sup> | serious <sup>b</sup>      | none <sup>c</sup>    | 13/364 (3.6%)                                 | 31/557 (5.6%)    | <b>RR 0.60</b><br>(0.32 to 1.13) | <b>22 fewer per 1,000</b><br>(from 38 fewer to 7 more)   | ⊕○○○<br>VERY LOW | IMPORTANT  |
| <b>Trauma- Pulmonary Embolism</b> |                       |                      |                      |                      |                           |                      |                                               |                  |                                  |                                                          |                  |            |
| 2                                 | observational studies | serious <sup>a</sup> | not serious          | serious <sup>e</sup> | very serious <sup>b</sup> | none <sup>c</sup>    | 3/274 (1.1%)                                  | 4/314 (1.3%)     | <b>RR 0.75</b><br>(0.17 to 3.31) | <b>3 fewer per 1,000</b><br>(from 11 fewer to 29 more)   | ⊕○○○<br>VERY LOW | IMPORTANT  |
| <b>Trauma- ICU LOS (Mean)</b>     |                       |                      |                      |                      |                           |                      |                                               |                  |                                  |                                                          |                  |            |
| 6                                 | observational studies | serious <sup>a</sup> | not serious          | serious <sup>e</sup> | very serious <sup>f</sup> | none <sup>d</sup>    | 462                                           | 1175             | -                                | <b>MD 0.03 lower</b><br>(0.19 lower to 0.13 higher)      | ⊕○○○<br>VERY LOW | IMPORTANT  |
| <b>Trauma-Hospital LOS (Mean)</b> |                       |                      |                      |                      |                           |                      |                                               |                  |                                  |                                                          |                  |            |
| 6                                 | observational studies | serious <sup>a</sup> | not serious          | serious <sup>e</sup> | very serious <sup>f</sup> | none <sup>c</sup>    | 462                                           | 1175             | -                                | <b>MD 2.17 lower</b><br>(2.82 lower to 1.52 lower)       | ⊕○○○<br>VERY LOW | IMPORTANT  |
| <b>Trauma RBC transfusion</b>     |                       |                      |                      |                      |                           |                      |                                               |                  |                                  |                                                          |                  |            |

| Certainty assessment                |                       |                      |               |                      |                           |                      | № of patients                                 |              | Effect                 |                                                  | Certainty        | Importance |
|-------------------------------------|-----------------------|----------------------|---------------|----------------------|---------------------------|----------------------|-----------------------------------------------|--------------|------------------------|--------------------------------------------------|------------------|------------|
| № of studies                        | Study design          | Risk of bias         | Inconsistency | Indirectness         | Imprecision               | Other considerations | Massive Transfusion Protocol with Prothrombin | plasma       | Relative (95% CI)      | Absolute (95% CI)                                |                  |            |
| 4                                   | observational studies | serious <sup>a</sup> | not serious   | serious <sup>e</sup> | serious <sup>g</sup>      | none <sup>c</sup>    | 364                                           | 557          | -                      | MD 3.33 lower (3.87 lower to 2.79 lower)         | ⊕○○○<br>VERY LOW | IMPORTANT  |
| <b>Trauma-FFP Transfusion Units</b> |                       |                      |               |                      |                           |                      |                                               |              |                        |                                                  |                  |            |
| 3                                   | observational studies | serious <sup>a</sup> | not serious   | serious <sup>e</sup> | serious <sup>g</sup>      | none <sup>c</sup>    | 324                                           | 477          | -                      | MD 0.63 lower (0.96 lower to 0.31 lower)         | ⊕○○○<br>VERY LOW | IMPORTANT  |
| <b>Trauma-Platelets</b>             |                       |                      |               |                      |                           |                      |                                               |              |                        |                                                  |                  |            |
| 4                                   | observational studies | serious <sup>a</sup> | not serious   | serious <sup>e</sup> | very serious <sup>f</sup> | none <sup>c</sup>    | 364                                           | 557          | -                      | MD 0.1 lower (0.44 lower to 0.24 higher)         | ⊕○○○<br>VERY LOW | IMPORTANT  |
| <b>Trauma- Sepsis</b>               |                       |                      |               |                      |                           |                      |                                               |              |                        |                                                  |                  |            |
| 1                                   | observational studies | serious <sup>a</sup> | not serious   | serious <sup>e</sup> | serious <sup>b</sup>      | none <sup>c</sup>    | 3/18 (16.7%)                                  | 6/18 (33.3%) | RR 0.50 (0.15 to 1.70) | 167 fewer per 1,000 (from 283 fewer to 233 more) | ⊕○○○<br>VERY LOW | IMPORTANT  |

CI: Confidence interval; RR: Risk ratio; MD: Mean difference

## Explanations

- a. Studies included were at a high risk of bias. The majority of studies were retrospective cohorts.
- b. Rated down for imprecision due to wide confidence intervals and small number of events.
- c. Could not formally assess for publication bias due to small number of studies.
- d. Rated down for significant heterogeneity with point estimates on both sides of the line of no effect.
- e. In some of the studies the intervention group received PCC and FFP, compared to FFP alone.
- f. Rated down for wide confidence intervals, and some studies had to undergo data transformation from median to mean.
- g. Rated down for imprecision as some studies had to undergo data transformation from median to mean.

## Mortality

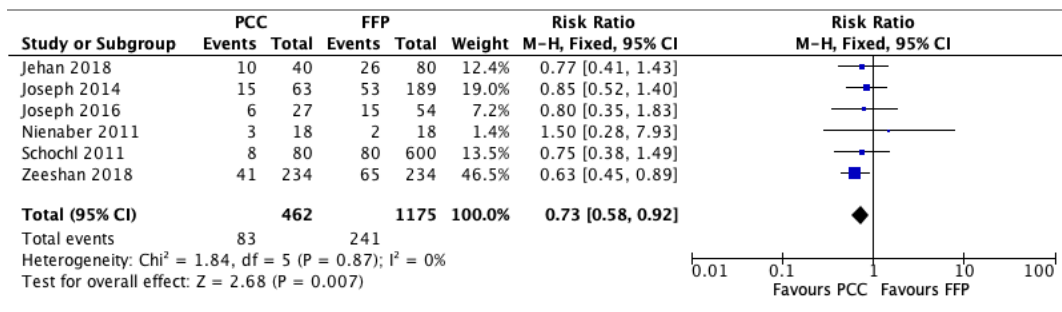

## DVT

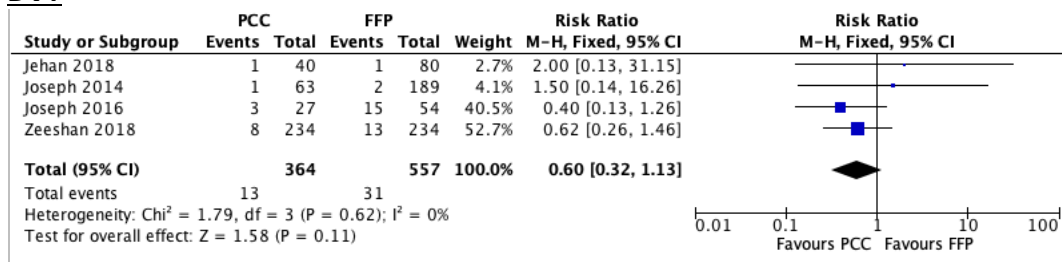

## PE

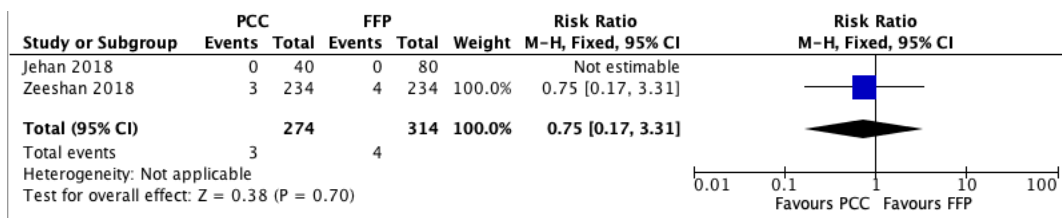

## ICU LOS (Mean)

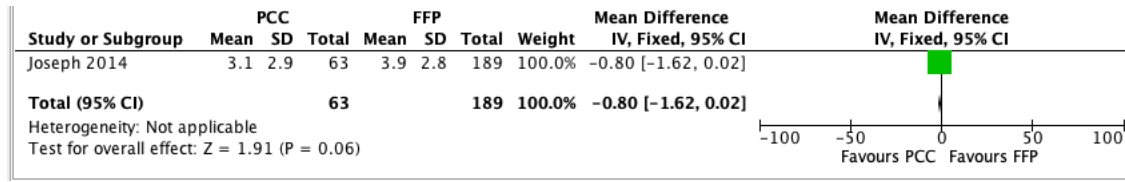

### ICU LOS With all transformed data

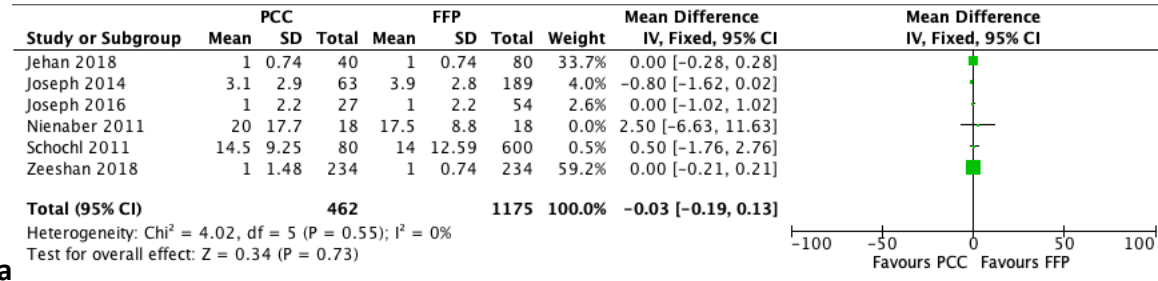

### Hospital LOS (Mean)

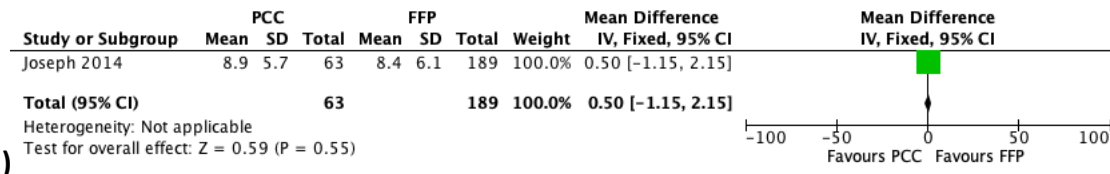

### Hospital LOS with all transformed data

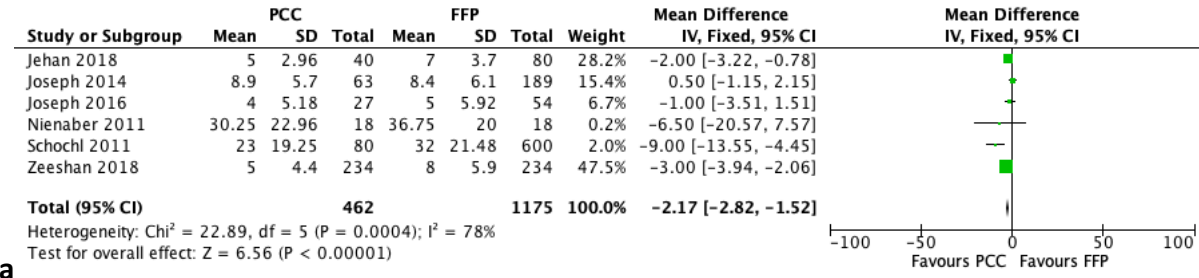

## RBC Transfusion (units)

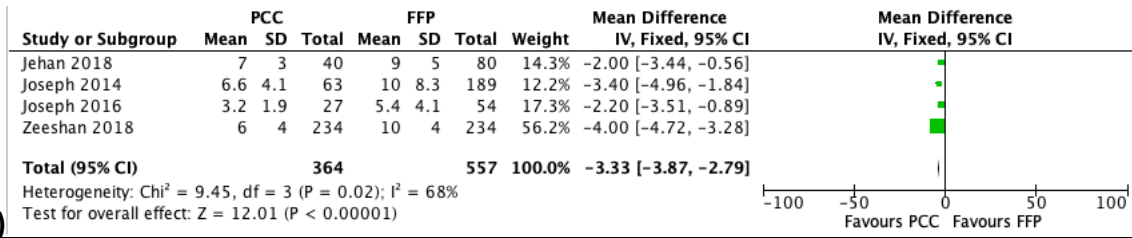

## FFP Transfusion

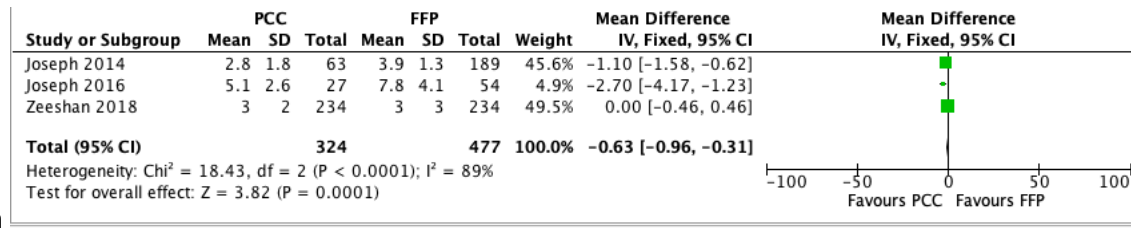

## Platelet Transfusion

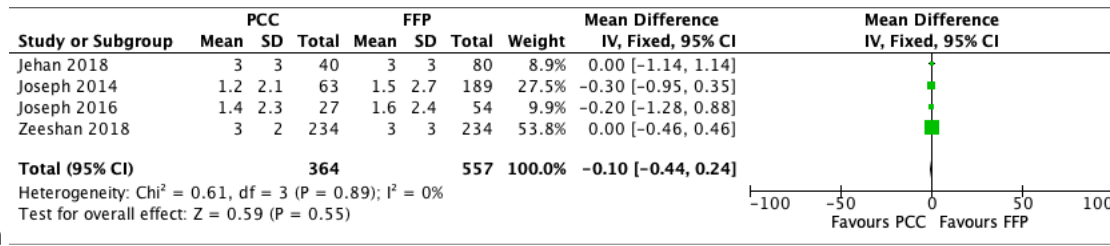

## Sepsis

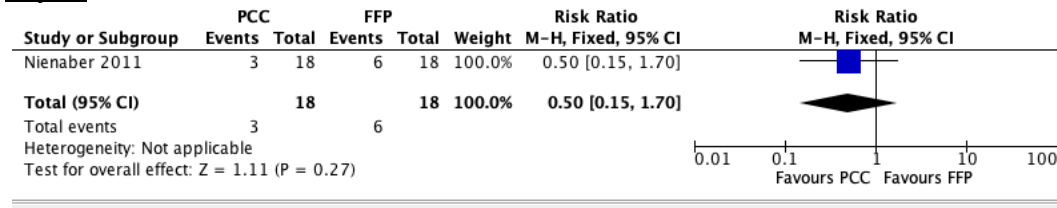

## GI-Liver Transplant

### Liver Transplant ETD

#### Liver Transplant ETD

| Certainty assessment                         |                       |              |               |              |                           |                      | № of patients                                 |        | Effect            |                                                     | Certainty         | Importance |
|----------------------------------------------|-----------------------|--------------|---------------|--------------|---------------------------|----------------------|-----------------------------------------------|--------|-------------------|-----------------------------------------------------|-------------------|------------|
| № of studies                                 | Study design          | Risk of bias | Inconsistency | Indirectness | Imprecision               | Other considerations | Massive Transfusion Protocol with Prothrombin | plasma | Relative (95% CI) | Absolute (95% CI)                                   |                   |            |
| <b>Liver Transplant-RBC transfusion</b>      |                       |              |               |              |                           |                      |                                               |        |                   |                                                     |                   |            |
| 1                                            | observational studies | not serious  | not serious   | not serious  | very serious <sup>a</sup> | none <sup>b</sup>    | 60                                            | 60     | -                 | MD <b>2.03 lower</b><br>(3.7 lower to 0.36 lower)   | ⊕○○○○<br>VERY LOW | IMPORTANT  |
| <b>Liver Transplant-FFP</b>                  |                       |              |               |              |                           |                      |                                               |        |                   |                                                     |                   |            |
| 1                                            | observational studies | not serious  | not serious   | not serious  | very serious <sup>a</sup> | none <sup>b</sup>    | 60                                            | 60     | -                 | MD <b>3.58 lower</b><br>(4.73 lower to 2.43 lower)  | ⊕○○○○<br>VERY LOW | IMPORTANT  |
| <b>Liver Transplant-Platelet Transfusion</b> |                       |              |               |              |                           |                      |                                               |        |                   |                                                     |                   |            |
| 1                                            | observational studies | not serious  | not serious   | not serious  | very serious <sup>a</sup> | none                 | 60                                            | 60     | -                 | MD <b>0.69 higher</b><br>(1.12 lower to 2.5 higher) | ⊕○○○○<br>VERY LOW | IMPORTANT  |

CI: Confidence interval; RR: Risk ratio; MD: Mean difference

### Explanations

- a. Rated down for imprecision due to wide confidence intervals and small number of events.  
 b. Could not formally assess for publication bias due to small number of studies.

### RBC Transfusion



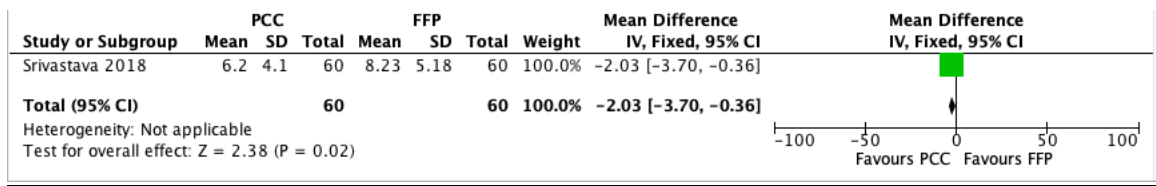

### FFP Transfusion

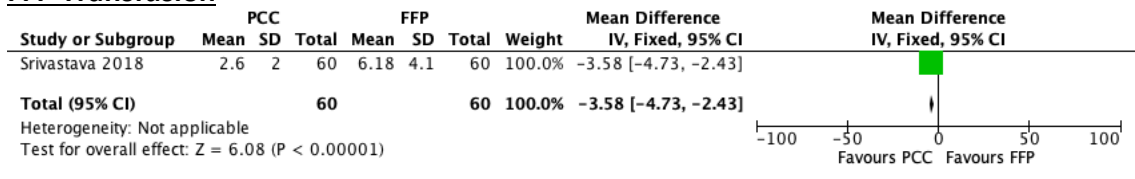

### Platelet Transfusion

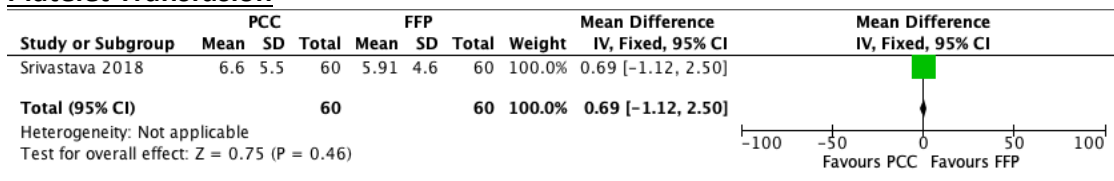

### TBI

TBI ETD

| Certainty assessment          |                       |              |               |                      |                           |                      | № of patients                                 |                | Effect                           |                                                            | Certainty        | Importance |
|-------------------------------|-----------------------|--------------|---------------|----------------------|---------------------------|----------------------|-----------------------------------------------|----------------|----------------------------------|------------------------------------------------------------|------------------|------------|
| № of studies                  | Study design          | Risk of bias | Inconsistency | Indirectness         | Imprecision               | Other considerations | Massive Transfusion Protocol with Prothrombin | plasma         | Relative (95% CI)                | Absolute (95% CI)                                          |                  |            |
| <b>TBI- Mortality</b>         |                       |              |               |                      |                           |                      |                                               |                |                                  |                                                            |                  |            |
| 1                             | observational studies | not serious  | not serious   | serious <sup>d</sup> | not serious               | none <sup>b</sup>    | 23/74 (31.1%)                                 | 68/148 (45.9%) | <b>RR 0.68</b><br>(0.46 to 0.99) | <b>147 fewer per 1,000</b><br>(from 248 fewer to 5 fewer)  | ⊕○○○<br>VERY LOW | CRITICAL   |
| <b>TBI- VTE</b>               |                       |              |               |                      |                           |                      |                                               |                |                                  |                                                            |                  |            |
| 1                             | observational studies | serious      | not serious   | serious <sup>d</sup> | serious <sup>a</sup>      | none <sup>b</sup>    | 3/74 (4.1%)                                   | 5/148 (3.4%)   | <b>RR 1.20</b><br>(0.29 to 4.89) | <b>7 more per 1,000</b><br>(from 24 fewer to 131 more)     | ⊕○○○<br>VERY LOW | IMPORTANT  |
| <b>TBI-Progression of ICH</b> |                       |              |               |                      |                           |                      |                                               |                |                                  |                                                            |                  |            |
| 1                             | observational studies | not serious  | not serious   | serious <sup>d</sup> | not serious               | none <sup>b</sup>    | 18/74 (24.3%)                                 | 65/148 (43.9%) | <b>RR 0.55</b><br>(0.36 to 0.86) | <b>198 fewer per 1,000</b><br>(from 281 fewer to 61 fewer) | ⊕○○○<br>VERY LOW | IMPORTANT  |
| <b>TBI-ICU LOS</b>            |                       |              |               |                      |                           |                      |                                               |                |                                  |                                                            |                  |            |
| 1                             | observational studies | not serious  | not serious   | serious              | very serious <sup>d</sup> | none <sup>b</sup>    | 74                                            | 148            | -                                | <b>MD 0.6 lower</b><br>(1.36 lower to 0.16 higher)         | ⊕○○○<br>VERY LOW | IMPORTANT  |
| <b>TBI-Hospital LOS</b>       |                       |              |               |                      |                           |                      |                                               |                |                                  |                                                            |                  |            |
| 1                             | observational studies | not serious  | not serious   | serious <sup>d</sup> | serious <sup>c</sup>      | none <sup>b</sup>    | 74                                            | 148            | -                                | <b>MD 1.1 lower</b><br>(2.88 lower to 0.68 higher)         | ⊕○○○<br>VERY LOW | IMPORTANT  |
| <b>TBI-RBC Transfusion</b>    |                       |              |               |                      |                           |                      |                                               |                |                                  |                                                            |                  |            |
| 1                             | observational studies | not serious  | not serious   | serious <sup>d</sup> | serious <sup>c</sup>      | none <sup>b</sup>    | 74                                            | 148            | -                                | <b>MD 0.6 lower</b><br>(1.25 lower to 0.05 higher)         | ⊕○○○<br>VERY LOW | IMPORTANT  |
| <b>TBI-FFP Transfusion</b>    |                       |              |               |                      |                           |                      |                                               |                |                                  |                                                            |                  |            |

| Certainty assessment            |                       |              |               |                      |                      |                      | № of patients                                 |        | Effect            |                                              | Certainty        | Importance |
|---------------------------------|-----------------------|--------------|---------------|----------------------|----------------------|----------------------|-----------------------------------------------|--------|-------------------|----------------------------------------------|------------------|------------|
| № of studies                    | Study design          | Risk of bias | Inconsistency | Indirectness         | Imprecision          | Other considerations | Massive Transfusion Protocol with Prothrombin | plasma | Relative (95% CI) | Absolute (95% CI)                            |                  |            |
| 1                               | observational studies | not serious  | not serious   | serious <sup>a</sup> | serious <sup>c</sup> |                      | 74                                            | 148    | -                 | MD 0.9 lower<br>(1.58 lower to 0.22 lower)   | -                | IMPORTANT  |
| <b>TBI-Platelet transfusion</b> |                       |              |               |                      |                      |                      |                                               |        |                   |                                              |                  |            |
| 1                               | observational studies | not serious  | not serious   | serious <sup>a</sup> | not serious          | none <sup>b</sup>    | 74                                            | 148    | -                 | MD 0.2 higher<br>(0.29 lower to 0.69 higher) | ⊕○○○<br>VERY LOW | IMPORTANT  |

CI: Confidence interval; RR: Risk ratio; MD: Mean difference

## Explanations

- a. Rated down for imprecision due to wide confidence intervals and small number of events.
- b. Could not formally assess for publication bias due to small number of studies
- c. Rated down for imprecision due to wide confidence intervals.
- d. The study intervention group received PCC and FFP, compared to FFP alone.

## Mortality

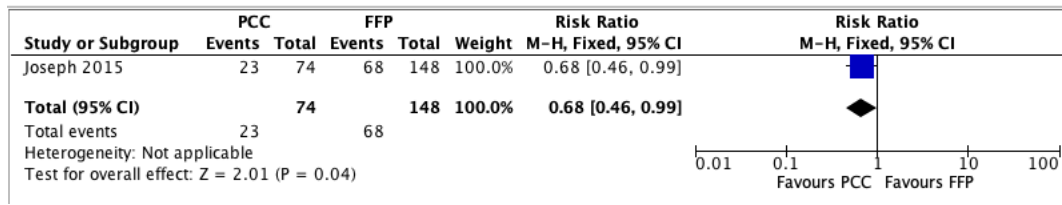

## VTE

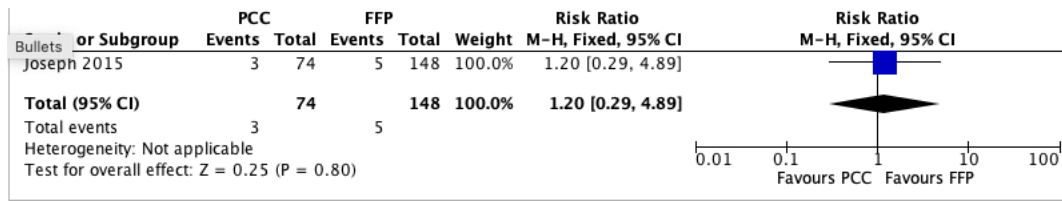

## Progression of ICH

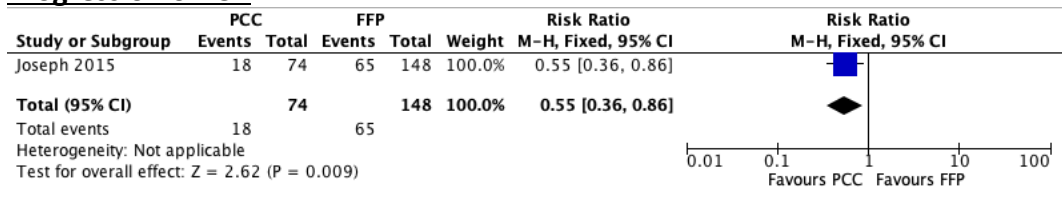

## ICU LOS

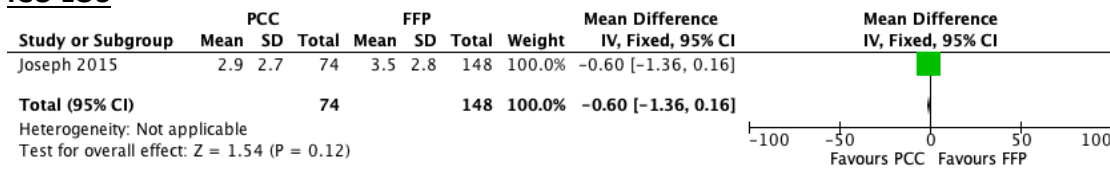

## Hospital LOS

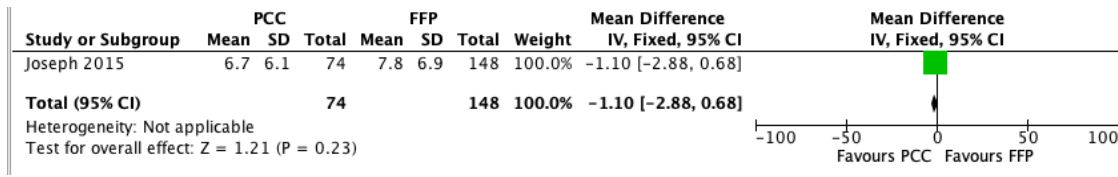

### RBC Transfusion

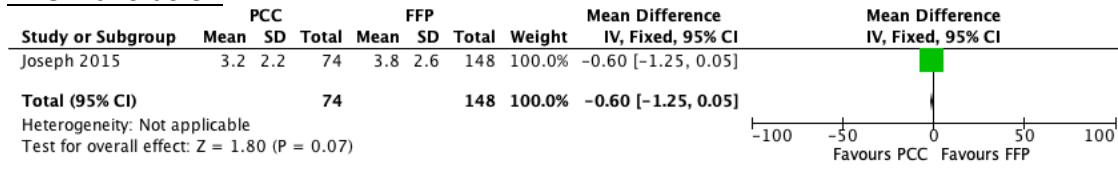

### FFP Transfusion

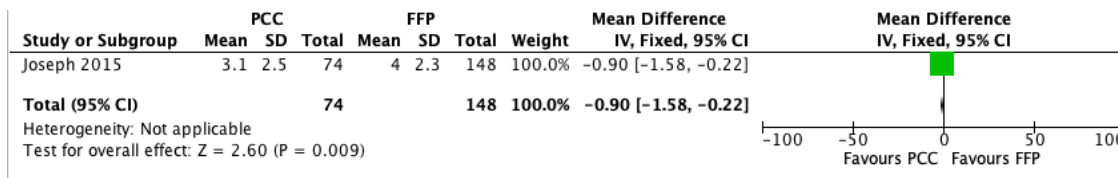

### Platelet Transfusion

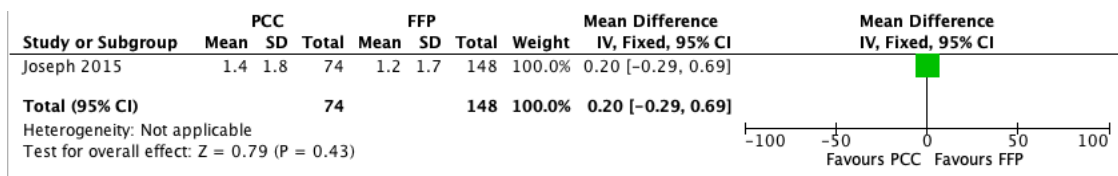

**Evidence Summary 4: Fibrinogen replacement in massively bleeding, critically ill adults**

## Early/empiric fibrinogen in massively bleeding patients

### 1. Trauma - Randomized controlled trials

| Certainty assessment                          |              |                          |              |                           |                      | No of patients |                | Effect                 |                                                | Certainty        | Importance |
|-----------------------------------------------|--------------|--------------------------|--------------|---------------------------|----------------------|----------------|----------------|------------------------|------------------------------------------------|------------------|------------|
| No of studies                                 | Risk of bias | Inconsistency            | Indirectness | Imprecision               | Other considerations | Fibrinogen     | Control        | Relative (95% CI)      | Absolute (95% CI)                              |                  |            |
| <b>All-cause mortality - Trauma (RCT)</b>     |              |                          |              |                           |                      |                |                |                        |                                                |                  |            |
| 5 RCTs                                        | not serious  | serious <sup>a</sup>     | not serious  | serious <sup>b</sup>      | none                 | 20/139 (14.4%) | 23/149 (15.4%) | RR 1.02 (0.33 to 3.11) | 3 more per 1,000 (from 103 fewer to 326 more)  | ⊕⊕○○<br>LOW      | CRITICAL   |
| <b>Death due to hemorrhage - Trauma (RCT)</b> |              |                          |              |                           |                      |                |                |                        |                                                |                  |            |
| 3 RCTs                                        | not serious  | not serious              | not serious  | very serious <sup>d</sup> | none                 | 5/65 (7.7%)    | 7/69 (10.1%)   | RR 0.77 (0.27 to 2.18) | 23 fewer per 1,000 (from 74 fewer to 120 more) | ⊕⊕○○<br>LOW      | CRITICAL   |
| <b>Myocardial infarction - Trauma (RCT)</b>   |              |                          |              |                           |                      |                |                |                        |                                                |                  |            |
| 3 RCTs                                        | not serious  | not serious              | not serious  | very serious <sup>c</sup> | none                 | 0/65 (0.0%)    | 0/69 (0.0%)    | not pooled             | see comment                                    | ⊕⊕○○<br>LOW      | CRITICAL   |
| <b>ARDS - Trauma (RCT)</b>                    |              |                          |              |                           |                      |                |                |                        |                                                |                  |            |
| 2 RCTs                                        | not serious  | not serious              | not serious  | very serious <sup>d</sup> | none                 | 0/41 (0.0%)    | 3/45 (6.7%)    | RR 0.27 (0.03 to 2.37) | 49 fewer per 1,000 (from 65 fewer to 91 more)  | ⊕⊕○○<br>LOW      | CRITICAL   |
| <b>Renal failure - Trauma (RCT)</b>           |              |                          |              |                           |                      |                |                |                        |                                                |                  |            |
| 2 RCTs                                        | not serious  | not serious              | not serious  | very serious <sup>d</sup> | none                 | 8/65 (12.3%)   | 9/74 (12.2%)   | RR 1.01 (0.41 to 2.47) | 1 more per 1,000 (from 72 fewer to 179 more)   | ⊕⊕○○<br>LOW      | CRITICAL   |
| <b>Sepsis - Trauma (RCT)</b>                  |              |                          |              |                           |                      |                |                |                        |                                                |                  |            |
| 5 RCTs                                        | not serious  | not serious              | not serious  | serious <sup>b</sup>      | none                 | 26/139 (18.7%) | 28/149 (18.8%) | RR 1.00 (0.62 to 1.60) | 0 fewer per 1,000 (from 71 fewer to 113 more)  | ⊕⊕⊕○<br>MODERATE | IMPORTANT  |
| <b>ICU length of stay - Trauma (RCT)</b>      |              |                          |              |                           |                      |                |                |                        |                                                |                  |            |
| 2 RCTs                                        | not serious  | not serious <sup>e</sup> | not serious  | serious <sup>f</sup>      | none                 | 64             | 71             | -                      | MD 4.83 lower (8.12 lower to 1.55 lower)       | ⊕⊕⊕○<br>MODERATE | IMPORTANT  |
| <b>Hospital length of stay - Trauma (RCT)</b> |              |                          |              |                           |                      |                |                |                        |                                                |                  |            |

## Early/empiric fibrinogen in massively bleeding patients

|                                                      |             |                           |             |                           |      |                  |                  |                                  |                                                            |                  |           |
|------------------------------------------------------|-------------|---------------------------|-------------|---------------------------|------|------------------|------------------|----------------------------------|------------------------------------------------------------|------------------|-----------|
| 3 RCTs                                               | not serious | not serious               | not serious | serious <sup>b</sup>      | none | 94               | 101              | -                                | MD <b>0.87 lower</b><br>(3.05 lower to 1.31 higher)        | ⊕⊕⊕○<br>MODERATE | IMPORTANT |
| <b>RBCs transfused - Trauma (RCT)</b>                |             |                           |             |                           |      |                  |                  |                                  |                                                            |                  |           |
| 6 RCTs                                               | not serious | serious <sup>e</sup>      | not serious | serious <sup>b</sup>      | none | 167              | 174              | -                                | MD <b>0.68 lower</b><br>(1.95 lower to 0.59 higher)        | ⊕⊕○○<br>LOW      | IMPORTANT |
| <b>Plasma transfused - Trauma (RCT)</b>              |             |                           |             |                           |      |                  |                  |                                  |                                                            |                  |           |
| 4 RCTs                                               | not serious | very serious <sup>b</sup> | not serious | serious <sup>b</sup>      | none | 93               | 94               | -                                | MD <b>0.36 higher</b><br>(2.21 lower to 2.92 higher)       | ⊕○○○<br>VERY LOW | IMPORTANT |
| <b>Platelets transfused - Trauma (RCT)</b>           |             |                           |             |                           |      |                  |                  |                                  |                                                            |                  |           |
| 4 RCTs                                               | not serious | serious <sup>e</sup>      | not serious | not serious               | none | 109              | 119              | -                                | MD <b>0.57 higher</b><br>(0.31 higher to 0.83 higher)      | ⊕⊕⊕○<br>MODERATE | IMPORTANT |
| <b>Proportion receiving RBCs - Trauma (RCT)</b>      |             |                           |             |                           |      |                  |                  |                                  |                                                            |                  |           |
| 1 RCT                                                | not serious | not serious               | not serious | very serious <sup>d</sup> | none | 13/28<br>(46.4%) | 11/25<br>(44.0%) | RR <b>1.06</b><br>(0.58 to 1.91) | <b>26 more per 1,000</b><br>(from 185 fewer to 400 more)   | ⊕⊕○○<br>LOW      | IMPORTANT |
| <b>Proportion receiving plasma - Trauma (RCT)</b>    |             |                           |             |                           |      |                  |                  |                                  |                                                            |                  |           |
| 1 RCT                                                | not serious | not serious               | not serious | very serious <sup>d</sup> | none | 13/28<br>(46.4%) | 11/25<br>(44.0%) | RR <b>1.06</b><br>(0.58 to 1.91) | <b>26 more per 1,000</b><br>(from 185 fewer to 400 more)   | ⊕⊕○○<br>LOW      | IMPORTANT |
| <b>Proportion receiving platelets - Trauma (RCT)</b> |             |                           |             |                           |      |                  |                  |                                  |                                                            |                  |           |
| 1 RCT                                                | not serious | not serious               | not serious | very serious <sup>d</sup> | none | 0/28 (0.0%)      | 3/25<br>(12.0%)  | RR <b>0.13</b><br>(0.01 to 2.36) | <b>104 fewer per 1,000</b><br>(from 119 fewer to 163 more) | ⊕⊕○○<br>LOW      | IMPORTANT |

CI: Confidence interval; RR: Risk ratio; OR: Odds ratio; MD: Mean difference

### Explanations

- Significant heterogeneity with point estimates on both sides of the line of no effect.
- Wide confidence intervals, which do not exclude significant harm or benefit.
- The absence of any deaths means we are unable to estimate the effect for this outcome.
- Very small number of events resulting in very serious imprecision.
- Significant statistical heterogeneity between the included studies not easily explained by study characteristics.
- Statistically significant reduction in length of stay, though small number of patients.



## Early/empiric fibrinogen in massively bleeding patients

### 2. Trauma- observational studies

| Certainty assessment                                |                      |                      |              |                      |                      | № of patients       |                     | Effect                           |                                                        | Certainty        | Importance |
|-----------------------------------------------------|----------------------|----------------------|--------------|----------------------|----------------------|---------------------|---------------------|----------------------------------|--------------------------------------------------------|------------------|------------|
| № of studies                                        | Risk of bias         | Inconsistency        | Indirectness | Imprecision          | Other considerations | Fibrinogen          | Control             | Relative (95% CI)                | Absolute (95% CI)                                      |                  |            |
| <b>All-cause mortality - Trauma (observational)</b> |                      |                      |              |                      |                      |                     |                     |                                  |                                                        |                  |            |
| 5<br>Observational<br>Studies                       | not<br>serious       | not serious          | not serious  | serious <sup>b</sup> | none                 | 391/1246<br>(31.4%) | 237/1312<br>(18.1%) | <b>RR 1.11</b><br>(0.87 to 1.42) | <b>20 more per 1,000</b><br>(from 23 fewer to 76 more) | ⊕○○○<br>VERY LOW | CRITICAL   |
| <b>Death due to hemorrhage - Trauma (Obs)</b>       |                      |                      |              |                      |                      |                     |                     |                                  |                                                        |                  |            |
| 1<br>Observational<br>study                         | serious <sup>c</sup> | not serious          | not serious  | serious <sup>b</sup> | none                 | 90/758<br>(11.9%)   | 28/269<br>(10.4%)   | <b>RR 1.14</b><br>(0.76 to 1.70) | <b>15 more per 1,000</b><br>(from 25 fewer to 73 more) | ⊕○○○<br>VERY LOW | CRITICAL   |
| <b>Sepsis - Trauma (obs)</b>                        |                      |                      |              |                      |                      |                     |                     |                                  |                                                        |                  |            |
| 2<br>Observational<br>studies                       | not<br>serious       | not serious          | not serious  | serious <sup>b</sup> | none                 | 64/312<br>(20.5%)   | 58/312<br>(18.6%)   | <b>RR 1.10</b><br>(0.80 to 1.52) | <b>19 more per 1,000</b><br>(from 37 fewer to 97 more) | ⊕○○○<br>VERY LOW | IMPORTANT  |
| <b>Surgical intervention - Trauma (obs)</b>         |                      |                      |              |                      |                      |                     |                     |                                  |                                                        |                  |            |
| 1<br>Observational<br>study                         | serious <sup>c</sup> | not serious          | not serious  | serious <sup>b</sup> | none                 | 592/758<br>(78.1%)  | 195/269<br>(72.6%)  | <b>RR 1.08</b><br>(0.99 to 1.17) | <b>58 more per 1,000</b><br>(from 7 fewer to 123 more) | ⊕○○○<br>VERY LOW | IMPORTANT  |
| <b>ICU length of stay - Trauma (Obs)</b>            |                      |                      |              |                      |                      |                     |                     |                                  |                                                        |                  |            |
| 4<br>Observational<br>studies                       | serious <sup>c</sup> | not serious          | not serious  | not serious          | none                 | 1150                | 1182                | -                                | <b>MD 1.23 higher</b><br>(0.02 higher to 2.43 higher)  | ⊕○○○<br>VERY LOW | IMPORTANT  |
| <b>Hospital length of stay - Trauma (Obs)</b>       |                      |                      |              |                      |                      |                     |                     |                                  |                                                        |                  |            |
| 4<br>Observational<br>studies                       | not<br>serious       | serious <sup>d</sup> | not serious  | not serious          | none                 | 1150                | 1182                | -                                | <b>MD 2.69 lower</b><br>(5.27 lower to 0.1 lower)      | ⊕○○○<br>VERY LOW | IMPORTANT  |
| <b>RBCs transfused - Trauma (obs)</b>               |                      |                      |              |                      |                      |                     |                     |                                  |                                                        |                  |            |
| 4<br>Observational<br>studies                       | not<br>serious       | serious <sup>d</sup> | not serious  | not serious          | none                 | 1166                | 711                 | -                                | <b>MD 1.16 lower</b><br>(4.16 lower to 1.85 higher)    | ⊕○○○<br>VERY LOW | IMPORTANT  |

## Early/empiric fibrinogen in massively bleeding patients

| Plasma transfused - Trauma (obs)              |                |                           |             |             |      |                  |                    |                                  |                                                                |                  |           |
|-----------------------------------------------|----------------|---------------------------|-------------|-------------|------|------------------|--------------------|----------------------------------|----------------------------------------------------------------|------------------|-----------|
| 4<br>Observational<br>studies                 | not<br>serious | very serious <sup>d</sup> | not serious | not serious | none | 959              | 711                | -                                | MD <b>0.12 lower</b><br>(5.16 lower to 4.93 higher)            | ⊕○○○<br>VERY LOW | IMPORTANT |
| Platelets transfused - Trauma (obs)           |                |                           |             |             |      |                  |                    |                                  |                                                                |                  |           |
| 4<br>Observational<br>studies                 | not<br>serious | serious <sup>a</sup>      | not serious | not serious | none | 1166             | 720                | -                                | MD <b>0.78 higher</b><br>(0.66 higher to 0.9 higher)           | ⊕○○○<br>VERY LOW | IMPORTANT |
| Proportion receiving RBCs - Trauma (Obs)      |                |                           |             |             |      |                  |                    |                                  |                                                                |                  |           |
| 1<br>Observational<br>study                   | not<br>serious | not serious               | not serious | not serious | none | 57/80<br>(71.3%) | 583/601<br>(97.0%) | RR <b>0.73</b><br>(0.64 to 0.84) | <b>262 fewer per 1,000</b><br>(from 349 fewer to 155<br>fewer) | ⊕⊕○○<br>LOW      | IMPORTANT |
| Proportion receiving platelets - Trauma (obs) |                |                           |             |             |      |                  |                    |                                  |                                                                |                  |           |
| 1<br>Observational<br>study                   | not<br>serious | not serious               | not serious | not serious | none | 7/80 (8.8%)      | 163/371<br>(43.9%) | RR <b>0.20</b><br>(0.10 to 0.41) | <b>351 fewer per 1,000</b><br>(from 395 fewer to 259<br>fewer) | ⊕⊕○○<br>LOW      | IMPORTANT |

CI: Confidence interval; RR: Risk ratio; OR: Odds ratio; MD: Mean difference

### Explanations

- Significant heterogeneity with point estimates on both sides of the line of no effect.
- Wide confidence intervals, which do not exclude significant harm or benefit.
- Significant differences in baseline mortality risk between groups despite propensity-matching in Hamada 2020, which is the most-heavily weighted study.
- Significant statistical heterogeneity between the included studies not easily explained by study characteristics.

## Early/empiric fibrinogen in massively bleeding patients

### 3. Obstetric hemorrhage- RCTs

| Certainty assessment                                             |              |               |              |                           |                      | No of patients |               | Effect                    |                                                    | Certainty        | Importance |
|------------------------------------------------------------------|--------------|---------------|--------------|---------------------------|----------------------|----------------|---------------|---------------------------|----------------------------------------------------|------------------|------------|
| No of studies                                                    | Risk of bias | Inconsistency | Indirectness | Imprecision               | Other considerations | Fibrinogen     | Control       | Relative (95% CI)         | Absolute (95% CI)                                  |                  |            |
| <b>All-cause mortality - Obstetric (RCT)</b>                     |              |               |              |                           |                      |                |               |                           |                                                    |                  |            |
| 1 RCT                                                            | not serious  | not serious   | not serious  | very serious <sup>b</sup> | none                 | 0/123 (0.0%)   | 0/121 (0.0%)  | not estimable             |                                                    | ⊕⊕○○<br>LOW      | CRITICAL   |
| <b>Bleeding - Obstetric (RCT)</b>                                |              |               |              |                           |                      |                |               |                           |                                                    |                  |            |
| 1 RCT                                                            | not serious  | not serious   | not serious  | serious <sup>a</sup>      | none                 | 29             | 28            | -                         | MD 45 lower<br>(110.38 lower to 20.38 higher)      | ⊕⊕⊕○<br>MODERATE | IMPORTANT  |
| <b>Surgical intervention - Obstetric bleeding (RCT)</b>          |              |               |              |                           |                      |                |               |                           |                                                    |                  |            |
| 1 RCT                                                            | not serious  | not serious   | not serious  | very serious <sup>c</sup> | none                 | 4/29 (13.8%)   | 5/28 (17.9%)  | RR 0.77<br>(0.23 to 2.58) | 41 fewer per 1,000<br>(from 138 fewer to 282 more) | ⊕⊕○○<br>LOW      | IMPORTANT  |
| <b>Hospital length of stay - Obstetrical bleeding (RCT)</b>      |              |               |              |                           |                      |                |               |                           |                                                    |                  |            |
| 1 RCT                                                            | not serious  | not serious   | not serious  | serious <sup>a</sup>      | none                 | 29             | 28            | -                         | MD 1.61 lower<br>(3.27 lower to 0.05 higher)       | ⊕⊕⊕○<br>MODERATE | IMPORTANT  |
| <b>Proportion receiving RBCs - Obstetric bleeding (RCT)</b>      |              |               |              |                           |                      |                |               |                           |                                                    |                  |            |
| 1 RCT                                                            | not serious  | not serious   | not serious  | very serious <sup>c</sup> | none                 | 15/29 (51.7%)  | 14/28 (50.0%) | RR 1.03<br>(0.62 to 1.72) | 15 more per 1,000<br>(from 190 fewer to 360 more)  | ⊕⊕○○<br>LOW      | IMPORTANT  |
| <b>Proportion receiving plasma - Obstetric bleeding (RCT)</b>    |              |               |              |                           |                      |                |               |                           |                                                    |                  |            |
| 1 RCT                                                            | not serious  | not serious   | not serious  | very serious <sup>c</sup> | none                 | 6/29 (20.7%)   | 8/28 (28.6%)  | RR 0.72<br>(0.29 to 1.82) | 80 fewer per 1,000<br>(from 203 fewer to 234 more) | ⊕⊕○○<br>LOW      | IMPORTANT  |
| <b>Proportion receiving platelets - Obstetric bleeding (RCT)</b> |              |               |              |                           |                      |                |               |                           |                                                    |                  |            |
| 1 RCT                                                            | not serious  | not serious   | not serious  | very serious <sup>c</sup> | none                 | 1/29 (3.4%)    | 3/28 (10.7%)  | RR 0.32<br>(0.04 to 2.91) | 73 fewer per 1,000<br>(from 103 fewer to 205 more) | ⊕⊕○○<br>LOW      | IMPORTANT  |

CI: Confidence interval; RR: Risk ratio; OR: Odds ratio; MD: Mean difference

## Early/empiric fibrinogen in massively bleeding patients

### Explanations

- a. Wide confidence intervals, which do not exclude significant harm or benefit.
- b. The absence of any deaths means we are unable to estimate the effect for this outcome.
- c. Very small number of events resulting in very serious imprecision.

## Early/empiric fibrinogen in massively bleeding patients

### 1.Mortality

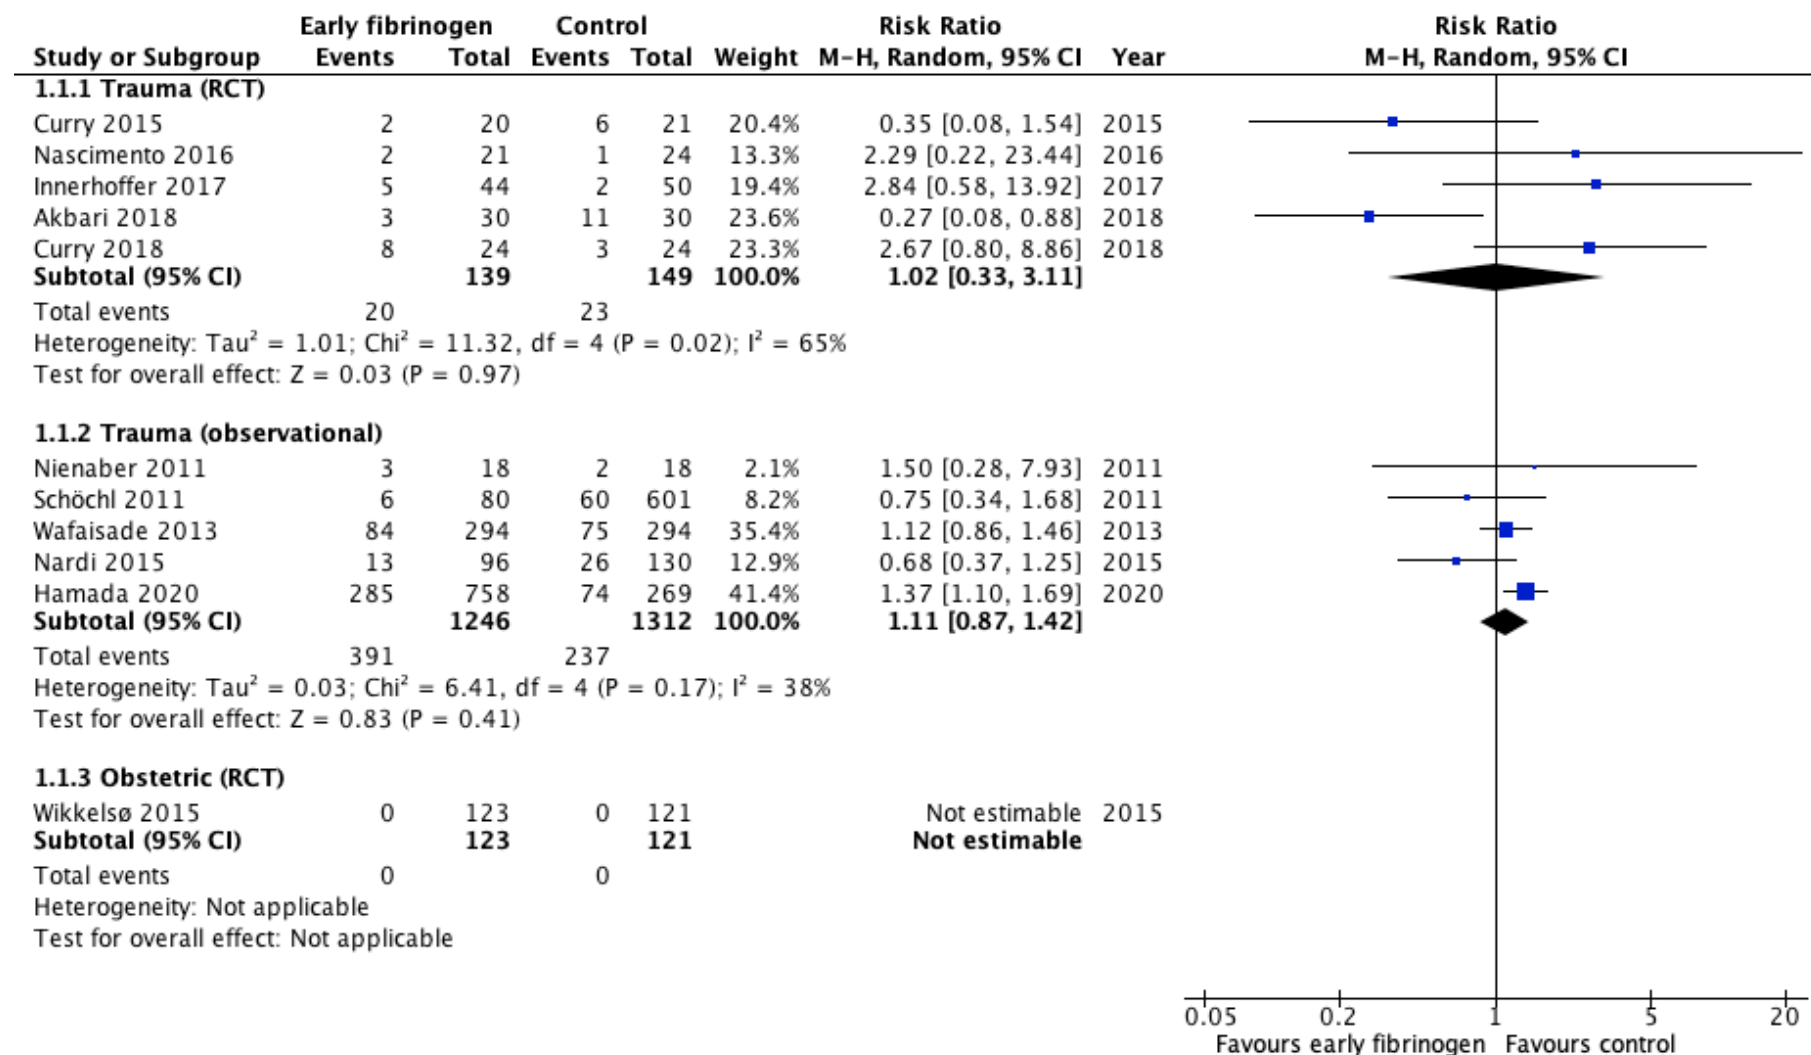

## Early/empiric fibrinogen in massively bleeding patients

### 2. Deaths due to hemorrhage

| Study or Subgroup                                                                   | Early fibrinogen |            | Control |            | Weight        | Risk Ratio               |  | Year |
|-------------------------------------------------------------------------------------|------------------|------------|---------|------------|---------------|--------------------------|--|------|
|                                                                                     | Events           | Total      | Events  | Total      |               | M-H, Fixed, 95% CI       |  |      |
| <b>1.2.1 Trauma (RCT)</b>                                                           |                  |            |         |            |               |                          |  |      |
| Curry 2015                                                                          | 2                | 20         | 6       | 21         | 79.9%         | 0.35 [0.08, 1.54]        |  | 2015 |
| Nascimento 2016                                                                     | 1                | 21         | 0       | 24         | 6.4%          | 3.41 [0.15, 79.47]       |  | 2016 |
| Curry 2018                                                                          | 2                | 24         | 1       | 24         | 13.7%         | 2.00 [0.19, 20.61]       |  | 2018 |
| <b>Subtotal (95% CI)</b>                                                            |                  | <b>65</b>  |         | <b>69</b>  | <b>100.0%</b> | <b>0.77 [0.27, 2.18]</b> |  |      |
| Total events                                                                        | 5                |            | 7       |            |               |                          |  |      |
| Heterogeneity: $\text{Chi}^2 = 2.59$ , $\text{df} = 2$ ( $P = 0.27$ ); $I^2 = 23\%$ |                  |            |         |            |               |                          |  |      |
| Test for overall effect: $Z = 0.49$ ( $P = 0.62$ )                                  |                  |            |         |            |               |                          |  |      |
| <b>1.2.2 Trauma (observational)</b>                                                 |                  |            |         |            |               |                          |  |      |
| Hamada 2020                                                                         | 90               | 758        | 28      | 269        | 100.0%        | 1.14 [0.76, 1.70]        |  | 2020 |
| <b>Subtotal (95% CI)</b>                                                            |                  | <b>758</b> |         | <b>269</b> | <b>100.0%</b> | <b>1.14 [0.76, 1.70]</b> |  |      |
| Total events                                                                        | 90               |            | 28      |            |               |                          |  |      |
| Heterogeneity: Not applicable                                                       |                  |            |         |            |               |                          |  |      |
| Test for overall effect: $Z = 0.64$ ( $P = 0.52$ )                                  |                  |            |         |            |               |                          |  |      |

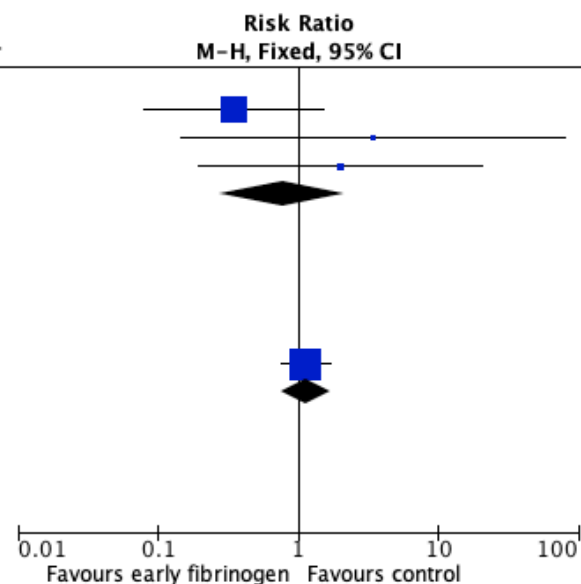

### 3. Stroke

| Study or Subgroup                                  | Early fibrinogen |           | Control |           | Weight        | Risk Ratio                |  | Year |
|----------------------------------------------------|------------------|-----------|---------|-----------|---------------|---------------------------|--|------|
|                                                    | Events           | Total     | Events  | Total     |               | M-H, Fixed, 95% CI        |  |      |
| <b>1.4.1 Trauma</b>                                |                  |           |         |           |               |                           |  |      |
| Curry 2015                                         | 0                | 20        | 0       | 21        |               | Not estimable             |  | 2015 |
| Nascimento 2016                                    | 0                | 21        | 0       | 24        |               | Not estimable             |  | 2016 |
| Curry 2018                                         | 1                | 24        | 1       | 24        | 100.0%        | 1.00 [0.07, 15.08]        |  | 2018 |
| <b>Subtotal (95% CI)</b>                           |                  | <b>65</b> |         | <b>69</b> | <b>100.0%</b> | <b>1.00 [0.07, 15.08]</b> |  |      |
| Total events                                       | 1                |           | 1       |           |               |                           |  |      |
| Heterogeneity: Not applicable                      |                  |           |         |           |               |                           |  |      |
| Test for overall effect: $Z = 0.00$ ( $P = 1.00$ ) |                  |           |         |           |               |                           |  |      |

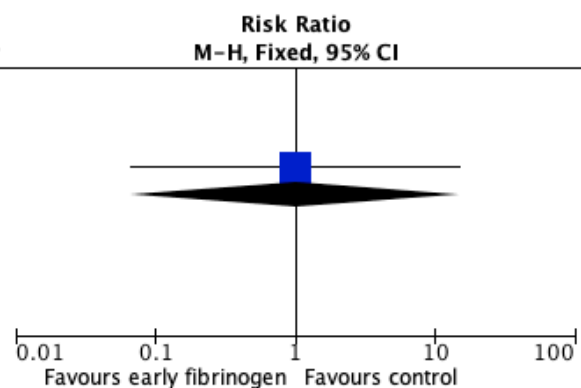

## Early/empiric fibrinogen in massively bleeding patients

### 4. ARDS

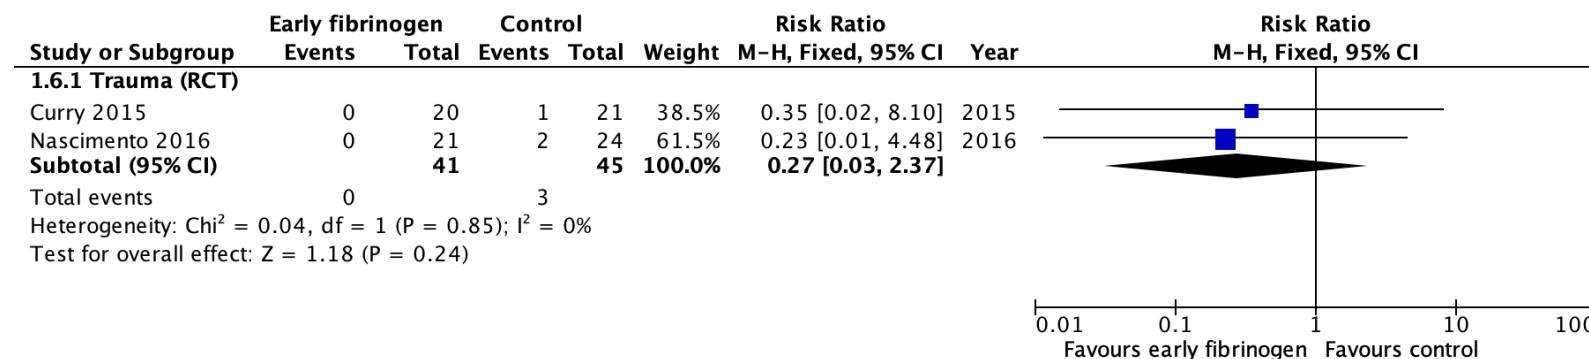

### 5. Thrombosis

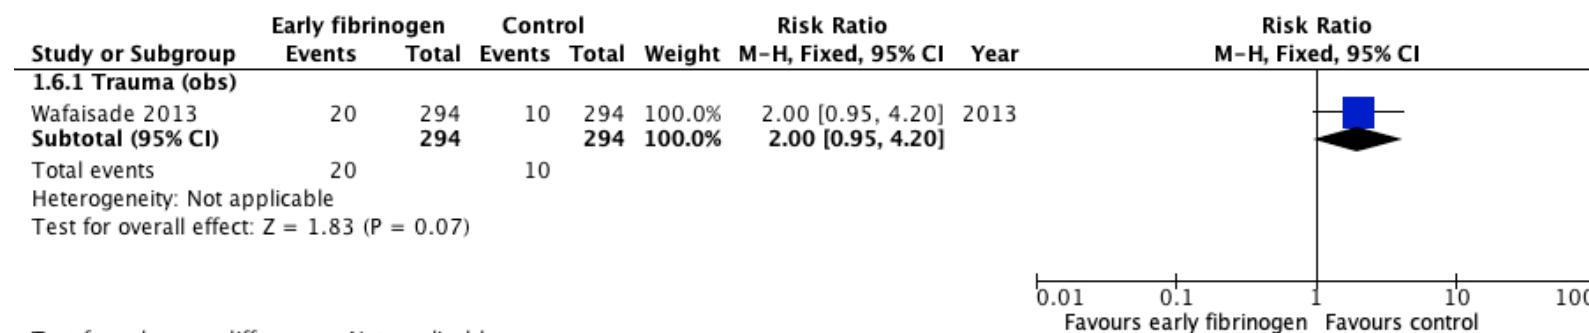

Test for subgroup differences: Not applicable

### 6. Renal failure

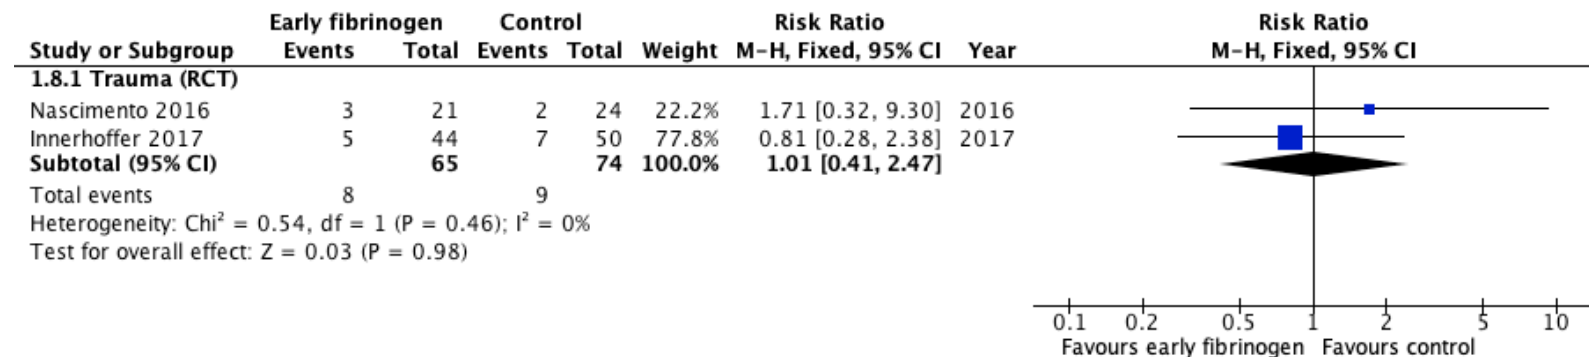

## Early/empiric fibrinogen in massively bleeding patients

### 6. Sepsis

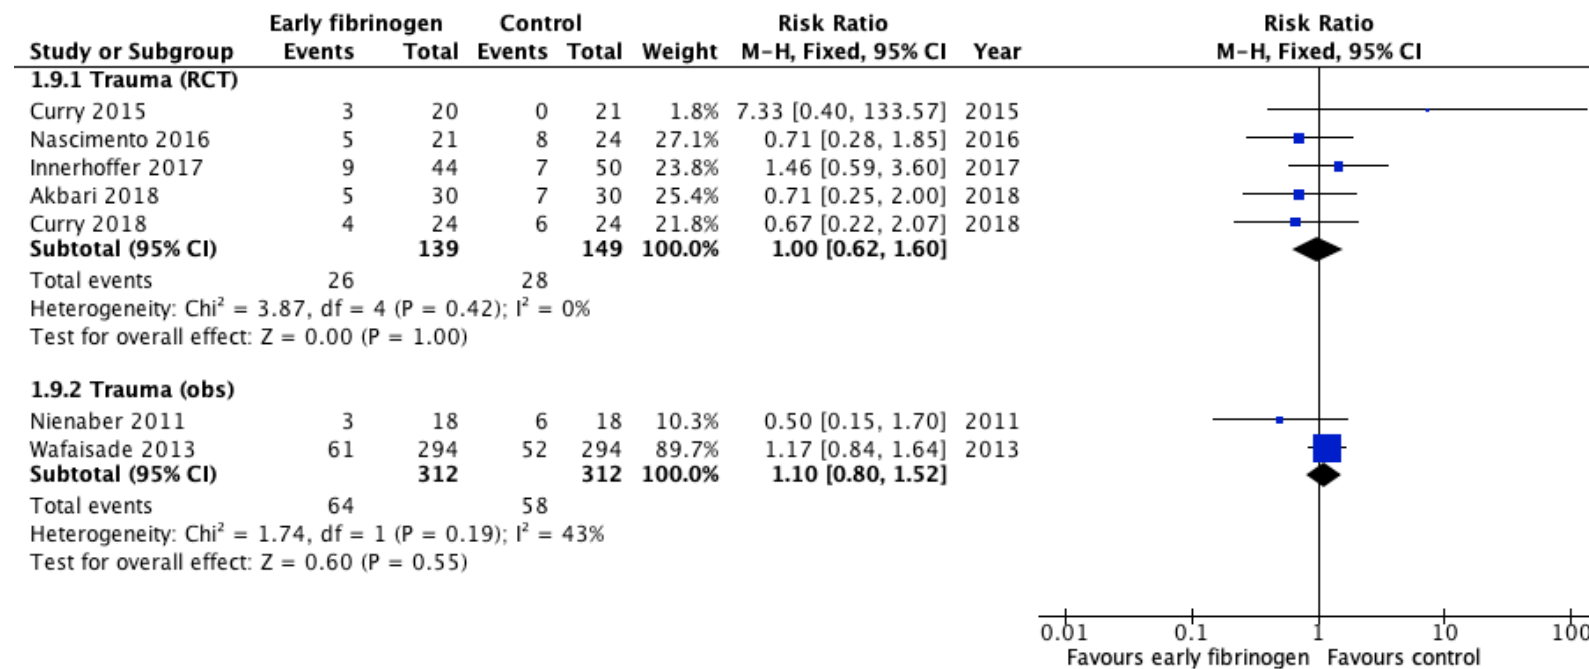

### 7. Bleeding

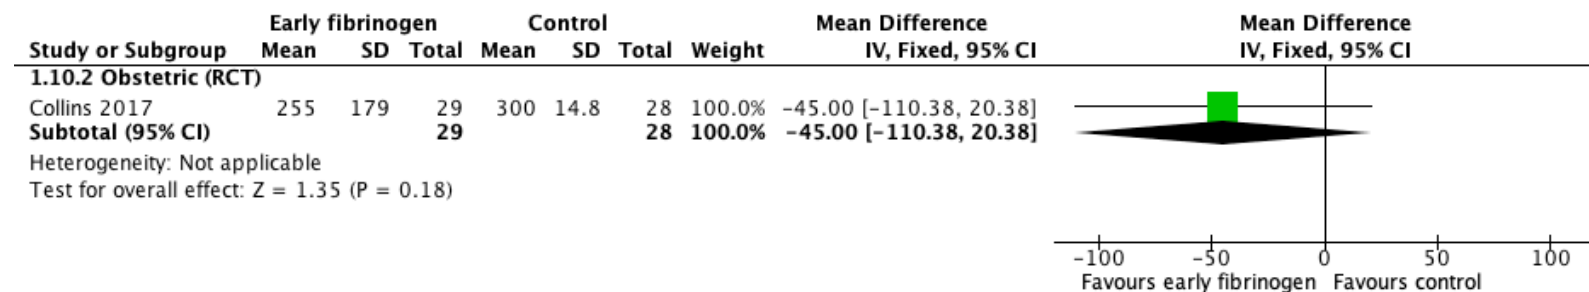



## Early/empiric fibrinogen in massively bleeding patients

### 8. Need for surgical intervention

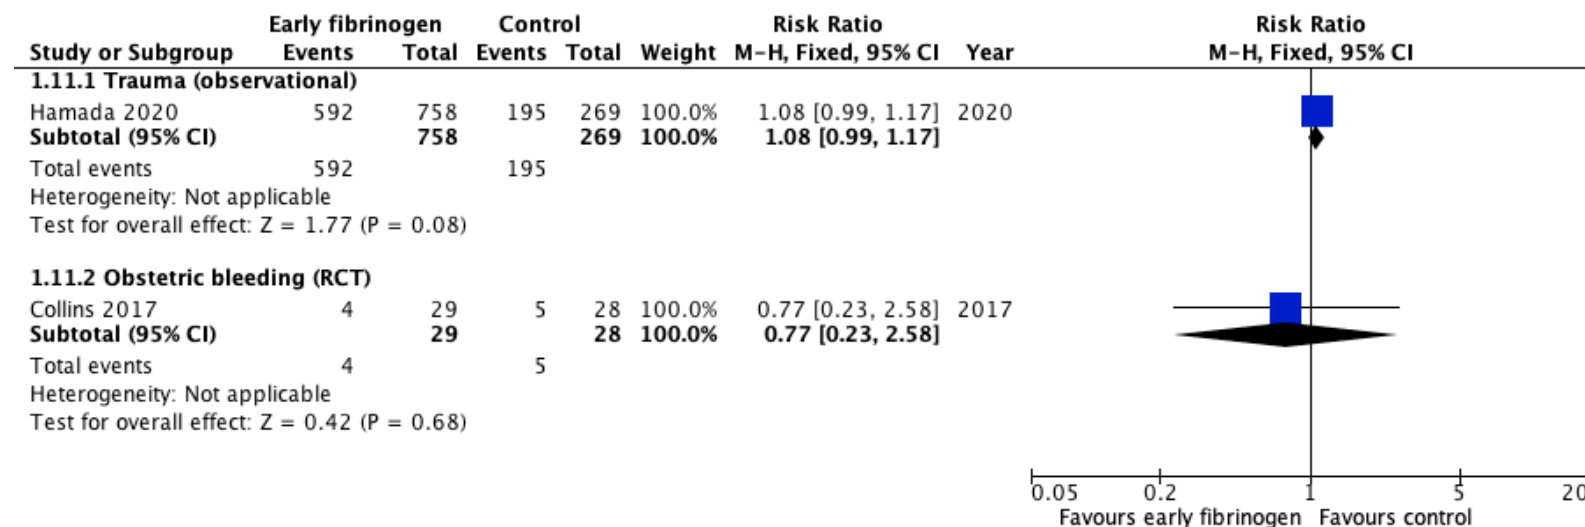

### 9. ICU length of stay

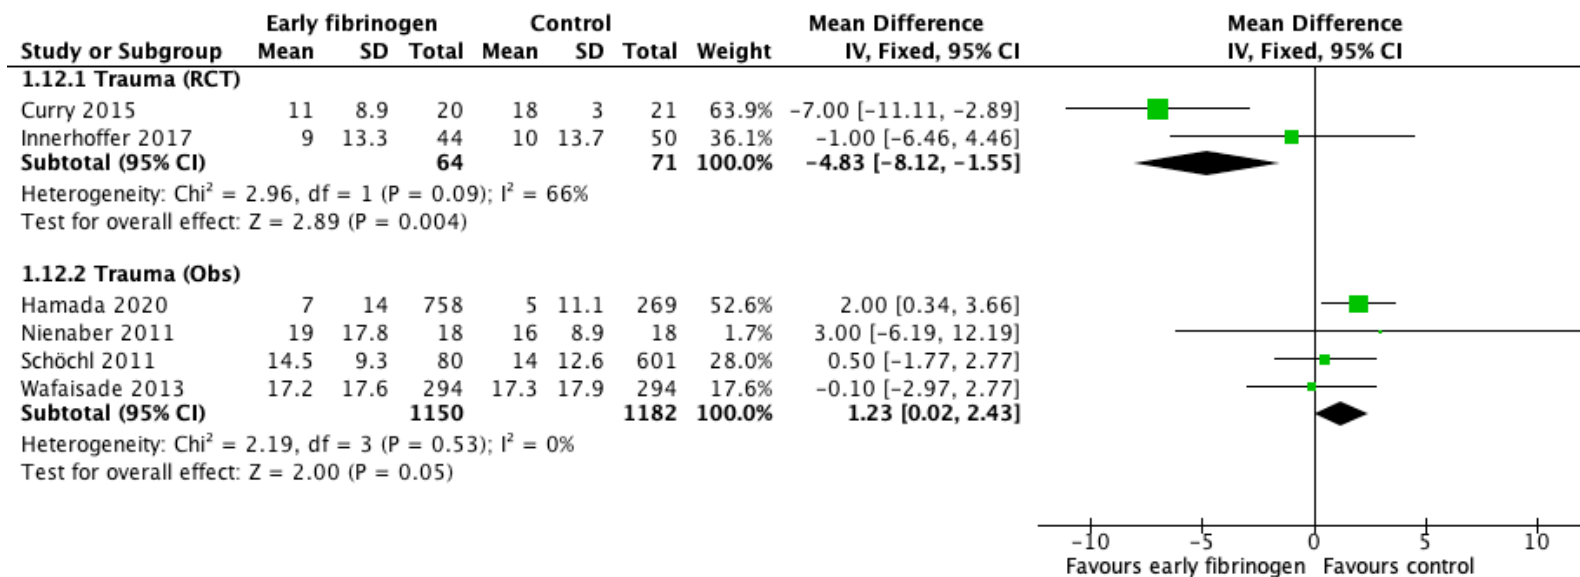

## Early/empiric fibrinogen in massively bleeding patients

### 10. Hospital length of stay

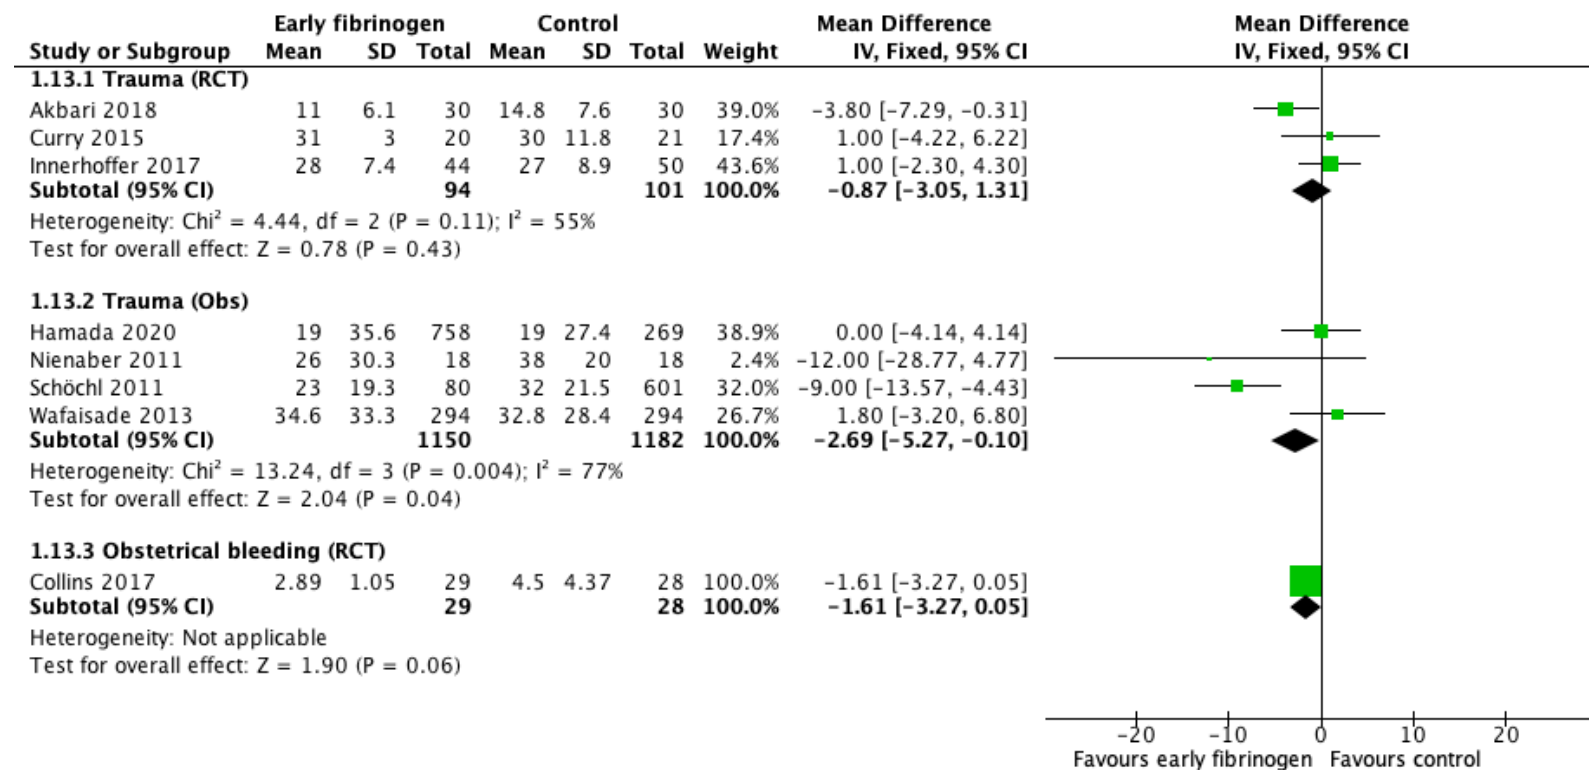

## Early/empiric fibrinogen in massively bleeding patients

### 12. RBCs transfused

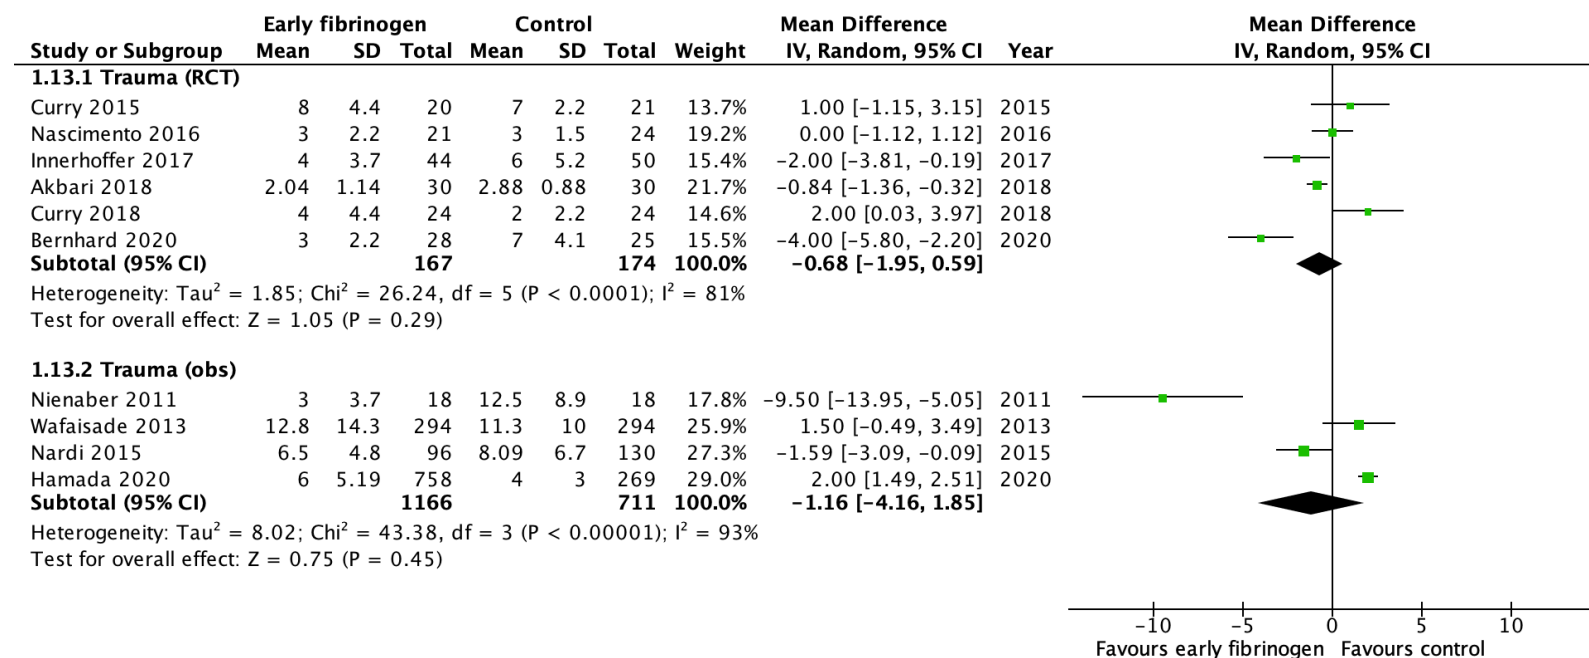

### 13. Plasma transfused

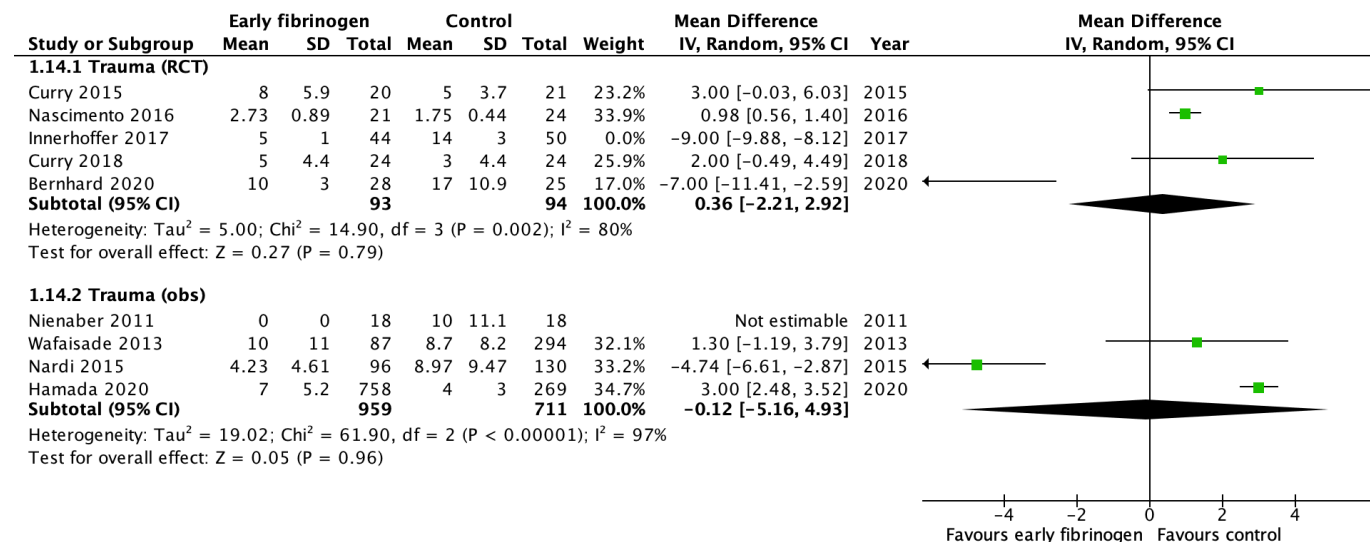

## Early/empiric fibrinogen in massively bleeding patients

### 14. Platelets transfused

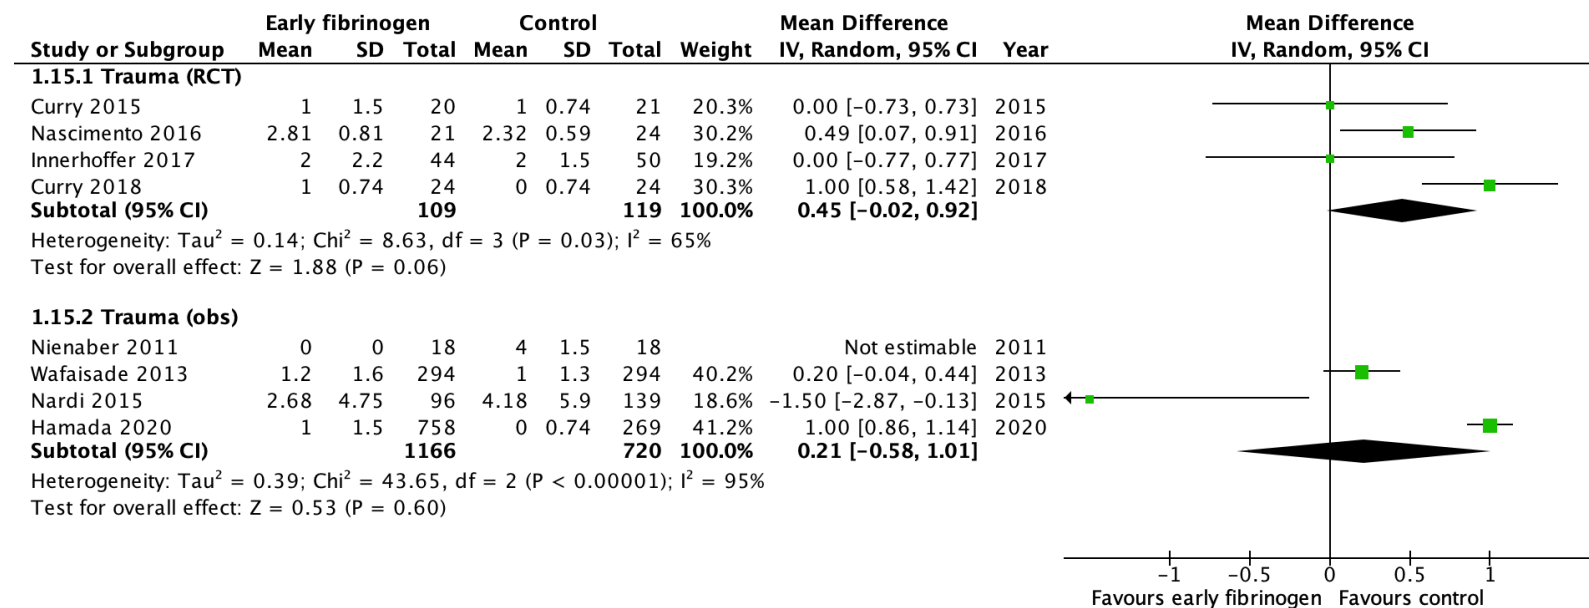

### 15. Proportion receiving RBCs

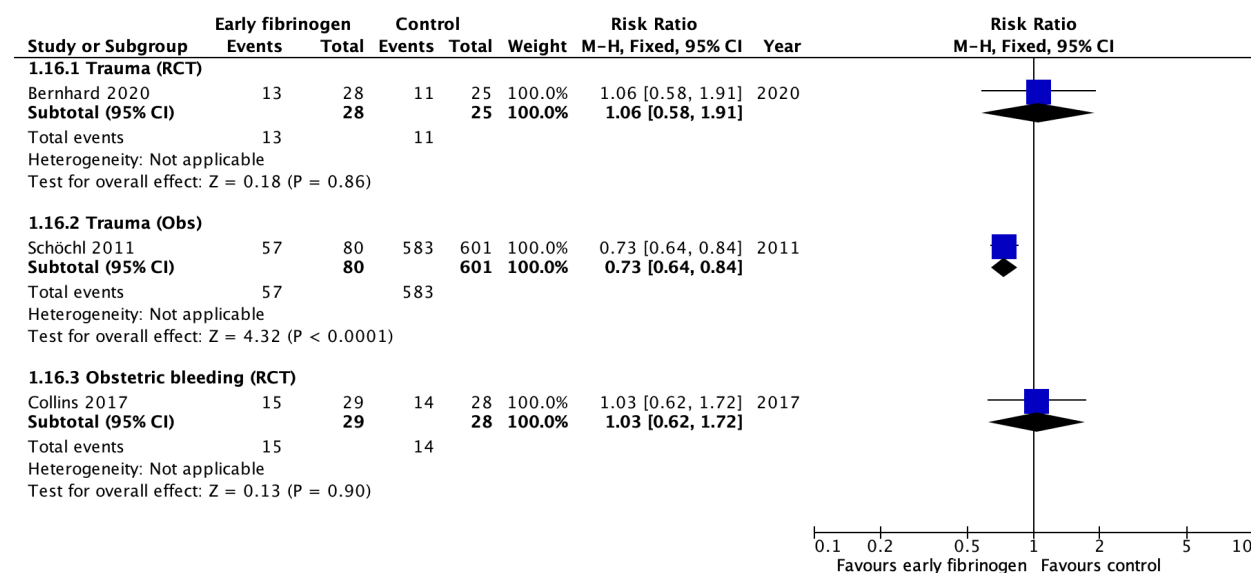

## Early/empiric fibrinogen in massively bleeding patients

### 16. Proportion receiving plasma

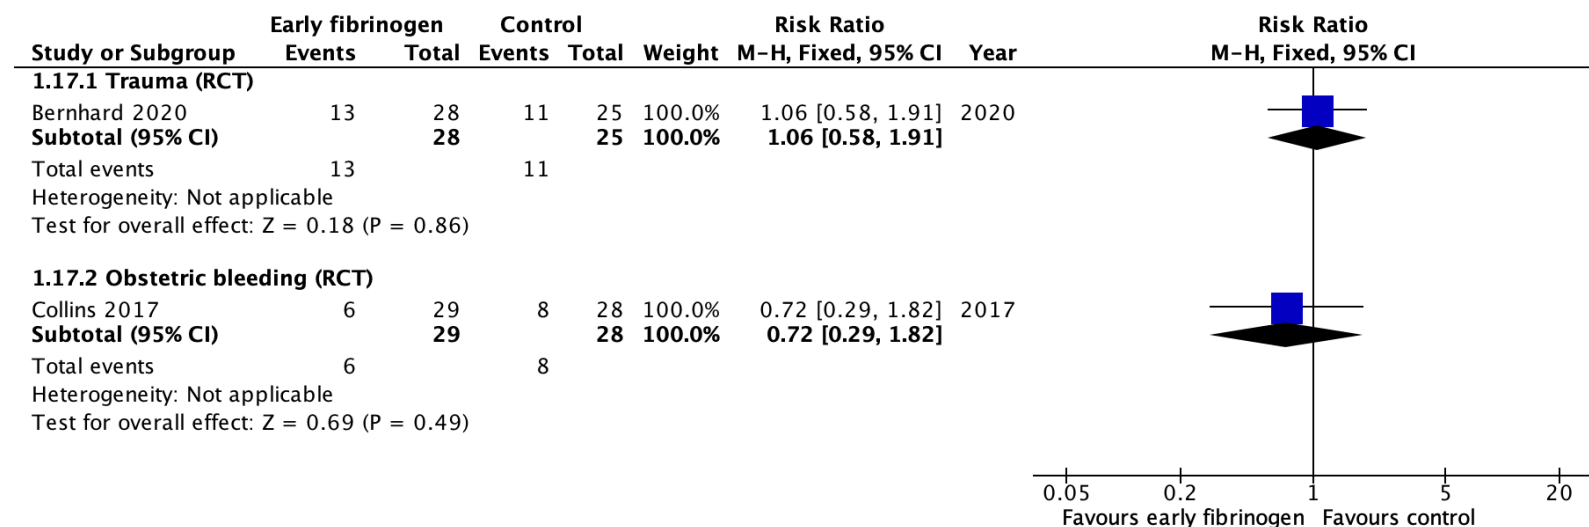

### 17. Proportion receiving platelets

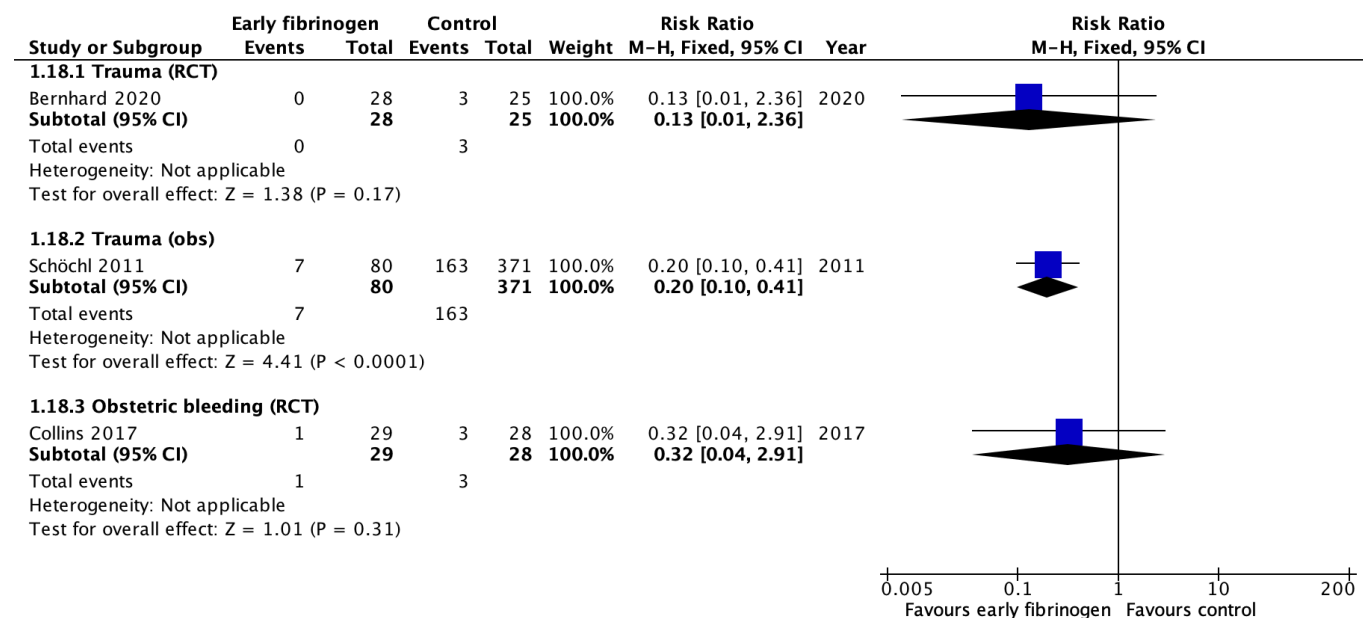

**Evidence Summary 5: Combined evidence summary for point of care vs. conventional coagulation testing in massively bleeding, critically ill adults and non-massively bleeding critically ill adults**

# Thromboelastography (TEG) in Massively and Non-massively bleeding Critically Ill patients

## GRADE- Non Massive Bleeding Patients

Author(s): ESICM Guideline Panel

| Certainty assessment                  |                   |                      |                             |              |                      |                                     | № of patients   |                      | Effect                 |                                                   | Certainty        | Importance |
|---------------------------------------|-------------------|----------------------|-----------------------------|--------------|----------------------|-------------------------------------|-----------------|----------------------|------------------------|---------------------------------------------------|------------------|------------|
| № of studies                          | Study design      | Risk of bias         | Inconsistency               | Indirectness | Imprecision          | Other considerations                | TEG             | Conventional testing | Relative (95% CI)      | Absolute (95% CI)                                 |                  |            |
| <b>CV- Mortality</b>                  |                   |                      |                             |              |                      |                                     |                 |                      |                        |                                                   |                  |            |
| 7                                     | randomised trials | not serious          | serious <sup>a</sup>        | not serious  | serious <sup>b</sup> | none <sup>c</sup>                   | 17/384 (4.4%)   | 27/370 (7.3%)        | RR 0.60 (0.34 to 1.07) | 29 fewer per 1,000 (from 48 fewer to 5 more)      | ⊕⊕○○<br>LOW      | CRITICAL   |
| <b>CV-Redo Surgery</b>                |                   |                      |                             |              |                      |                                     |                 |                      |                        |                                                   |                  |            |
| 10                                    | randomised trials | serious <sup>d</sup> | serious <sup>a</sup>        | not serious  | serious <sup>b</sup> | publication bias strongly suspected | 42/528 (8.0%)   | 62/524 (11.8%)       | RR 0.74 (0.51 to 1.06) | 31 fewer per 1,000 (from 58 fewer to 7 more)      | ⊕○○○<br>VERY LOW | IMPORTANT  |
| <b>CV-RBC transfusion</b>             |                   |                      |                             |              |                      |                                     |                 |                      |                        |                                                   |                  |            |
| 11                                    | randomised trials | serious <sup>d</sup> | serious <sup>a</sup>        | not serious  | not serious          | none <sup>e</sup>                   | 327/595 (55.0%) | 377/580 (65.0%)      | RR 0.86 (0.76 to 0.98) | 91 fewer per 1,000 (from 156 fewer to 13 fewer)   | ⊕⊕○○<br>LOW      | IMPORTANT  |
| <b>CV-Platelet transfusion</b>        |                   |                      |                             |              |                      |                                     |                 |                      |                        |                                                   |                  |            |
| 10                                    | randomised trials | serious <sup>d</sup> | very serious <sup>a,f</sup> | not serious  | not serious          | none <sup>e</sup>                   | 154/575 (26.8%) | 199/560 (35.5%)      | RR 0.68 (0.46 to 0.99) | 114 fewer per 1,000 (from 192 fewer to 4 fewer)   | ⊕○○○<br>VERY LOW | IMPORTANT  |
| <b>CV-FFP transfusion</b>             |                   |                      |                             |              |                      |                                     |                 |                      |                        |                                                   |                  |            |
| 8                                     | randomised trials | serious <sup>d</sup> | very serious <sup>a,g</sup> | not serious  | not serious          | none <sup>e</sup>                   | 91/522 (17.4%)  | 194/513 (37.8%)      | RR 0.46 (0.37 to 0.57) | 204 fewer per 1,000 (from 238 fewer to 163 fewer) | ⊕○○○<br>VERY LOW | IMPORTANT  |
| <b>CV-Cryoprecipitate transfusion</b> |                   |                      |                             |              |                      |                                     |                 |                      |                        |                                                   |                  |            |

| Certainty assessment |                   |                      |                             |              |                      |                      | № of patients  |                | Effect                 |                                                  | Certainty                                                                                       | Importance |
|----------------------|-------------------|----------------------|-----------------------------|--------------|----------------------|----------------------|----------------|----------------|------------------------|--------------------------------------------------|-------------------------------------------------------------------------------------------------|------------|
| № of studies         | Study design      | Risk of bias         | Inconsistency               | Indirectness | Imprecision          | Other considerations | TEG            | Conventional   | Relative (95% CI)      | Absolute (95% CI)                                |                                                                                                 |            |
| 4                    | randomised trials | serious <sup>d</sup> | very serious <sup>a,h</sup> | not serious  | serious <sup>i</sup> | none <sup>c</sup>    | 25/177 (14.1%) | 49/182 (26.9%) | RR 0.53 (0.35 to 0.79) | 127 fewer per 1,000 (from 175 fewer to 57 fewer) | <br>VERY LOW | IMPORTANT  |

CV-Hemostasis-12 hour post op bleeding

|   |                   |                      |                             |             |             |                   |     |     |   |                                               |                                                                                                 |           |
|---|-------------------|----------------------|-----------------------------|-------------|-------------|-------------------|-----|-----|---|-----------------------------------------------|-------------------------------------------------------------------------------------------------|-----------|
| 3 | randomised trials | serious <sup>d</sup> | very serious <sup>a,j</sup> | not serious | not serious | none <sup>c</sup> | 248 | 241 | - | MD 128.18 lower (172.38 lower to 83.97 lower) | <br>VERY LOW | IMPORTANT |
|---|-------------------|----------------------|-----------------------------|-------------|-------------|-------------------|-----|-----|---|-----------------------------------------------|-------------------------------------------------------------------------------------------------|-----------|

CV-Hemostasis-24 hr post op bleeding

|   |                   |                      |                      |             |             |                   |     |     |   |                                               |                                                                                            |           |
|---|-------------------|----------------------|----------------------|-------------|-------------|-------------------|-----|-----|---|-----------------------------------------------|--------------------------------------------------------------------------------------------|-----------|
| 4 | randomised trials | serious <sup>d</sup> | serious <sup>a</sup> | not serious | not serious | none <sup>c</sup> | 186 | 190 | - | MD 175.25 lower (305.19 lower to 45.32 lower) | <br>LOW | IMPORTANT |
|---|-------------------|----------------------|----------------------|-------------|-------------|-------------------|-----|-----|---|-----------------------------------------------|--------------------------------------------------------------------------------------------|-----------|

CV-Hospital LOS

|   |                   |                      |                             |             |                      |                   |     |     |   |                                           |                                                                                                   |           |
|---|-------------------|----------------------|-----------------------------|-------------|----------------------|-------------------|-----|-----|---|-------------------------------------------|---------------------------------------------------------------------------------------------------|-----------|
| 3 | randomised trials | serious <sup>d</sup> | very serious <sup>a,k</sup> | not serious | serious <sup>b</sup> | none <sup>c</sup> | 167 | 157 | - | MD 0.12 lower (0.45 lower to 0.21 higher) | <br>VERY LOW | IMPORTANT |
|---|-------------------|----------------------|-----------------------------|-------------|----------------------|-------------------|-----|-----|---|-------------------------------------------|---------------------------------------------------------------------------------------------------|-----------|

CV-ICU LOS

|   |                   |                      |                             |             |             |                   |     |     |   |                                          |                                                                                                   |           |
|---|-------------------|----------------------|-----------------------------|-------------|-------------|-------------------|-----|-----|---|------------------------------------------|---------------------------------------------------------------------------------------------------|-----------|
| 6 | randomised trials | serious <sup>d</sup> | very serious <sup>a,j</sup> | not serious | not serious | none <sup>c</sup> | 333 | 336 | - | MD 4.08 lower (6.33 lower to 1.82 lower) | <br>VERY LOW | IMPORTANT |
|---|-------------------|----------------------|-----------------------------|-------------|-------------|-------------------|-----|-----|---|------------------------------------------|---------------------------------------------------------------------------------------------------|-----------|

ECMO-Mortality

|   |                   |             |             |             |                             |                   |             |             |                        |                                                 |                                                                                              |          |
|---|-------------------|-------------|-------------|-------------|-----------------------------|-------------------|-------------|-------------|------------------------|-------------------------------------------------|----------------------------------------------------------------------------------------------|----------|
| 1 | randomised trials | not serious | not serious | not serious | very serious <sup>b,j</sup> | none <sup>c</sup> | 2/7 (28.6%) | 3/9 (33.3%) | RR 0.86 (0.19 to 3.81) | 47 fewer per 1,000 (from 270 fewer to 937 more) | <br>LOW | CRITICAL |
|---|-------------------|-------------|-------------|-------------|-----------------------------|-------------------|-------------|-------------|------------------------|-------------------------------------------------|----------------------------------------------------------------------------------------------|----------|

ECMO- Rebleeding

|   |                   |         |             |             |                             |                     |             |             |                        |                                                  |                                                                                                   |           |
|---|-------------------|---------|-------------|-------------|-----------------------------|---------------------|-------------|-------------|------------------------|--------------------------------------------------|---------------------------------------------------------------------------------------------------|-----------|
| 1 | randomised trials | serious | not serious | not serious | very serious <sup>l,m</sup> | none <sup>l,m</sup> | 2/7 (28.6%) | 6/9 (66.7%) | RR 0.43 (0.12 to 1.51) | 380 fewer per 1,000 (from 587 fewer to 340 more) | <br>VERY LOW | IMPORTANT |
|---|-------------------|---------|-------------|-------------|-----------------------------|---------------------|-------------|-------------|------------------------|--------------------------------------------------|---------------------------------------------------------------------------------------------------|-----------|



| Certainty assessment |              |              |               |              |             |                      | № of patients |              | Effect            |                   | Certainty | Importance |
|----------------------|--------------|--------------|---------------|--------------|-------------|----------------------|---------------|--------------|-------------------|-------------------|-----------|------------|
| № of studies         | Study design | Risk of bias | Inconsistency | Indirectness | Imprecision | Other considerations | TEG           | Conventional | Relative (95% CI) | Absolute (95% CI) |           |            |

#### ECMO-Thrombotic Complications

|   |                   |         |             |             |                             |                   |             |             |                        |                                                  |                                                                                                 |          |
|---|-------------------|---------|-------------|-------------|-----------------------------|-------------------|-------------|-------------|------------------------|--------------------------------------------------|-------------------------------------------------------------------------------------------------|----------|
| 1 | randomised trials | serious | not serious | not serious | very serious <sup>i,m</sup> | none <sup>c</sup> | 1/9 (11.1%) | 5/9 (55.6%) | RR 0.20 (0.03 to 1.39) | 444 fewer per 1,000 (from 539 fewer to 217 more) | <br>VERY LOW | CRITICAL |
|---|-------------------|---------|-------------|-------------|-----------------------------|-------------------|-------------|-------------|------------------------|--------------------------------------------------|-------------------------------------------------------------------------------------------------|----------|

CI: Confidence interval; RR: Risk ratio; MD: Mean difference

## Explanations

- Rated down for wide variance in the point estimates
- Rated down as confidence intervals overlaps 1, with no effect.
- Publication bias not formally assessed given few number of studies identified.
- Most studies included in the systematic review by Meco 2020 and Serriano and Murphy 2017, where of unclear or high risk of bias.
- Funnel plot though not asymmetric, given the small number of studies, still could be publication bias present.
- Rated down for considerable heterogeneity (I2 74%)
- Rated down for substantial heterogeneity (I2 68%)
- Rated down for substantial heterogeneity (I2 80%)
- Rated down for few number of events.
- Rated down for substantial heterogeneity (I2 84%)
- Rated down for substantial heterogeneity (I2 69%)
- Rated down for substantial heterogeneity (I2 85%)
- Rated down for overlapping confidence intervals

## GRADE-Massively Bleeding Patients

Author(s): ESICM Guideline Panel

Question: Point of Care compared to Conventional testing (TEG/ROTEM) for transfusions in massive bleeding?

Bibliography: Gurusamy 2011 (Wang 2010, Russo 2010), Kumar 2019, Rout 2019, Gonzalez 2017, Smart 2017

| Certainty assessment |              |              |               |              |             |                      | № of patients |              | Effect            |                   | Certainty | Importance |
|----------------------|--------------|--------------|---------------|--------------|-------------|----------------------|---------------|--------------|-------------------|-------------------|-----------|------------|
| № of studies         | Study design | Risk of bias | Inconsistency | Indirectness | Imprecision | Other considerations | TEG           | Conventional | Relative (95% CI) | Absolute (95% CI) |           |            |

#### GI-Cirrhrotic Bleeding-Mortality

|   |                   |             |             |                      |                      |                   |               |               |                        |                                                |                                                                                              |          |
|---|-------------------|-------------|-------------|----------------------|----------------------|-------------------|---------------|---------------|------------------------|------------------------------------------------|----------------------------------------------------------------------------------------------|----------|
| 2 | randomised trials | not serious | not serious | serious <sup>a</sup> | serious <sup>b</sup> | none <sup>c</sup> | 31/73 (42.5%) | 36/68 (52.9%) | RR 0.82 (0.59 to 1.13) | 95 fewer per 1,000 (from 217 fewer to 69 more) | <br>LOW | CRITICAL |
|---|-------------------|-------------|-------------|----------------------|----------------------|-------------------|---------------|---------------|------------------------|------------------------------------------------|----------------------------------------------------------------------------------------------|----------|

#### GI-Cirrhrotic Bleeding Rebleeding

|   |                   |             |                      |             |                           |                   |               |               |                        |                                                 |                                                                                                   |           |
|---|-------------------|-------------|----------------------|-------------|---------------------------|-------------------|---------------|---------------|------------------------|-------------------------------------------------|---------------------------------------------------------------------------------------------------|-----------|
| 2 | randomised trials | not serious | serious <sup>d</sup> | not serious | very serious <sup>e</sup> | none <sup>c</sup> | 22/62 (35.5%) | 27/54 (50.0%) | RR 0.71 (0.47 to 1.07) | 145 fewer per 1,000 (from 265 fewer to 35 more) | <br>VERY LOW | IMPORTANT |
|---|-------------------|-------------|----------------------|-------------|---------------------------|-------------------|---------------|---------------|------------------------|-------------------------------------------------|---------------------------------------------------------------------------------------------------|-----------|

#### GI-Cirrhrotic Bleeding-TRALI

| № of studies | Study design      | Certainty assessment |               |              |                           |                      | № of patients |               | Effect                 |                                                   | Certainty | Importance |
|--------------|-------------------|----------------------|---------------|--------------|---------------------------|----------------------|---------------|---------------|------------------------|---------------------------------------------------|-----------|------------|
|              |                   | Risk of bias         | Inconsistency | Indirectness | Imprecision               | Other considerations | TEG           | Conventional  | Relative (95% CI)      | Absolute (95% CI)                                 |           |            |
| 1            | randomised trials | not serious          | not serious   | not serious  | very serious <sup>e</sup> | none <sup>c</sup>    | 6/49 (12.2%)  | 23/47 (48.9%) | RR 0.25 (0.11 to 0.56) | 367 fewer per 1,000 (from 436 fewer to 215 fewer) | LOW       | IMPORTANT  |

#### GI-Cirrhotic Bleeding-TACO

|   |                   |             |             |             |                           |                   |              |               |                        |                                                 |     |           |
|---|-------------------|-------------|-------------|-------------|---------------------------|-------------------|--------------|---------------|------------------------|-------------------------------------------------|-----|-----------|
| 1 | randomised trials | not serious | not serious | not serious | very serious <sup>e</sup> | none <sup>c</sup> | 5/49 (10.2%) | 10/47 (21.3%) | RR 0.48 (0.18 to 1.30) | 111 fewer per 1,000 (from 174 fewer to 64 more) | LOW | IMPORTANT |
|---|-------------------|-------------|-------------|-------------|---------------------------|-------------------|--------------|---------------|------------------------|-------------------------------------------------|-----|-----------|

#### GI-Cirrhotic Bleeding-ARDS

|   |                   |             |             |             |                           |                   |             |              |                        |                                                  |     |           |
|---|-------------------|-------------|-------------|-------------|---------------------------|-------------------|-------------|--------------|------------------------|--------------------------------------------------|-----|-----------|
| 1 | randomised trials | not serious | not serious | not serious | very serious <sup>e</sup> | none <sup>c</sup> | 1/49 (2.0%) | 9/47 (19.1%) | RR 0.11 (0.01 to 0.81) | 170 fewer per 1,000 (from 190 fewer to 36 fewer) | LOW | IMPORTANT |
|---|-------------------|-------------|-------------|-------------|---------------------------|-------------------|-------------|--------------|------------------------|--------------------------------------------------|-----|-----------|

#### GI-Cirrhotic Bleeding-RBC Transfusion

|   |                   |             |             |             |                           |                   |               |               |                        |                                                |     |           |
|---|-------------------|-------------|-------------|-------------|---------------------------|-------------------|---------------|---------------|------------------------|------------------------------------------------|-----|-----------|
| 1 | randomised trials | not serious | not serious | not serious | very serious <sup>e</sup> | none <sup>c</sup> | 17/30 (56.7%) | 16/30 (53.3%) | RR 1.06 (0.67 to 1.68) | 32 more per 1,000 (from 176 fewer to 363 more) | LOW | IMPORTANT |
|---|-------------------|-------------|-------------|-------------|---------------------------|-------------------|---------------|---------------|------------------------|------------------------------------------------|-----|-----------|

#### GI-Cirrhotic Bleeding-Platelet Transfusion

|   |                   |             |             |             |                           |                   |              |               |                        |                                                   |     |           |
|---|-------------------|-------------|-------------|-------------|---------------------------|-------------------|--------------|---------------|------------------------|---------------------------------------------------|-----|-----------|
| 1 | randomised trials | not serious | not serious | not serious | very serious <sup>f</sup> | none <sup>c</sup> | 3/30 (10.0%) | 21/30 (70.0%) | RR 0.14 (0.05 to 0.43) | 602 fewer per 1,000 (from 665 fewer to 399 fewer) | LOW | IMPORTANT |
|---|-------------------|-------------|-------------|-------------|---------------------------|-------------------|--------------|---------------|------------------------|---------------------------------------------------|-----|-----------|

#### GI-Cirrhotic Bleeding-FFP Transfusion

|   |                   |             |             |             |                           |                   |              |               |                        |                                                   |     |           |
|---|-------------------|-------------|-------------|-------------|---------------------------|-------------------|--------------|---------------|------------------------|---------------------------------------------------|-----|-----------|
| 1 | randomised trials | not serious | not serious | not serious | very serious <sup>f</sup> | none <sup>c</sup> | 4/30 (13.3%) | 14/30 (46.7%) | RR 0.29 (0.11 to 0.77) | 331 fewer per 1,000 (from 415 fewer to 107 fewer) | LOW | IMPORTANT |
|---|-------------------|-------------|-------------|-------------|---------------------------|-------------------|--------------|---------------|------------------------|---------------------------------------------------|-----|-----------|

#### Trauma-Mortality

| № of studies | Study design      | Certainty assessment |               |              |                           |                      | № of patients |               | Effect                 |                                                | Certainty                                                                                       | Importance |
|--------------|-------------------|----------------------|---------------|--------------|---------------------------|----------------------|---------------|---------------|------------------------|------------------------------------------------|-------------------------------------------------------------------------------------------------|------------|
|              |                   | Risk of bias         | Inconsistency | Indirectness | Imprecision               | Other considerations | TEG           | Conventional  | Relative (95% CI)      | Absolute (95% CI)                              |                                                                                                 |            |
| 1            | randomised trials | serious              | not serious   | not serious  | very serious <sup>e</sup> | none <sup>c</sup>    | 11/56 (19.6%) | 20/55 (36.4%) | RR 0.54 (0.29 to 1.02) | 167 fewer per 1,000 (from 258 fewer to 7 more) | 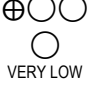<br>VERY LOW | CRITICAL   |

**Liver Transplant- Mortality**

|   |                   |             |             |             |                           |                   |              |              |                        |                                                 |                                                                                            |          |
|---|-------------------|-------------|-------------|-------------|---------------------------|-------------------|--------------|--------------|------------------------|-------------------------------------------------|--------------------------------------------------------------------------------------------|----------|
| 1 | randomised trials | not serious | not serious | not serious | very serious <sup>e</sup> | none <sup>c</sup> | 2/14 (14.3%) | 3/14 (21.4%) | RR 0.67 (0.13 to 3.40) | 71 fewer per 1,000 (from 186 fewer to 514 more) | <br>LOW | CRITICAL |
|---|-------------------|-------------|-------------|-------------|---------------------------|-------------------|--------------|--------------|------------------------|-------------------------------------------------|--------------------------------------------------------------------------------------------|----------|

**Liver Transplant- Blood Loss**

|   |                   |         |             |             |                           |                   |    |    |   |                                          |                                                                                                 |           |
|---|-------------------|---------|-------------|-------------|---------------------------|-------------------|----|----|---|------------------------------------------|-------------------------------------------------------------------------------------------------|-----------|
| 2 | randomised trials | serious | not serious | not serious | very serious <sup>f</sup> | none <sup>c</sup> | 31 | 31 | - | MD 1.13 lower (1.85 lower to 0.41 lower) | <br>VERY LOW | IMPORTANT |
|---|-------------------|---------|-------------|-------------|---------------------------|-------------------|----|----|---|------------------------------------------|-------------------------------------------------------------------------------------------------|-----------|

**Liver Transplant-RBC Transfusion**

|   |                   |         |                           |             |                      |                   |    |    |   |                                              |                                                                                                   |           |
|---|-------------------|---------|---------------------------|-------------|----------------------|-------------------|----|----|---|----------------------------------------------|---------------------------------------------------------------------------------------------------|-----------|
| 2 | randomised trials | serious | very serious <sup>g</sup> | not serious | serious <sup>b</sup> | none <sup>c</sup> | 31 | 31 | - | MD 12.22 lower (71.08 lower to 46.64 higher) | 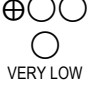<br>VERY LOW | IMPORTANT |
|---|-------------------|---------|---------------------------|-------------|----------------------|-------------------|----|----|---|----------------------------------------------|---------------------------------------------------------------------------------------------------|-----------|

**Liver Transplant-Platelet Transfusion**

|   |                   |         |             |             |                           |                   |    |    |   |                                           |                                                                                                   |           |
|---|-------------------|---------|-------------|-------------|---------------------------|-------------------|----|----|---|-------------------------------------------|---------------------------------------------------------------------------------------------------|-----------|
| 1 | randomised trials | serious | not serious | not serious | very serious <sup>e</sup> | none <sup>c</sup> | 14 | 14 | - | MD 2.8 lower (14.92 lower to 9.32 higher) | <br>VERY LOW | IMPORTANT |
|---|-------------------|---------|-------------|-------------|---------------------------|-------------------|----|----|---|-------------------------------------------|---------------------------------------------------------------------------------------------------|-----------|

**Liver Transplant- FFP Transfusion**

|   |                   |         |             |             |                           |                   |    |    |   |                                        |                                                                                                   |           |
|---|-------------------|---------|-------------|-------------|---------------------------|-------------------|----|----|---|----------------------------------------|---------------------------------------------------------------------------------------------------|-----------|
| 1 | randomised trials | serious | not serious | not serious | very serious <sup>f</sup> | none <sup>c</sup> | 14 | 14 | - | MD 8.7 lower (16.3 lower to 1.1 lower) | <br>VERY LOW | IMPORTANT |
|---|-------------------|---------|-------------|-------------|---------------------------|-------------------|----|----|---|----------------------------------------|---------------------------------------------------------------------------------------------------|-----------|

**Liver Transplant-Cryoprecipitate Transfusion**

|   |                   |         |             |             |                           |                   |    |    |   |                                          |                                                                                                   |           |
|---|-------------------|---------|-------------|-------------|---------------------------|-------------------|----|----|---|------------------------------------------|---------------------------------------------------------------------------------------------------|-----------|
| 1 | randomised trials | serious | not serious | not serious | very serious <sup>e</sup> | none <sup>c</sup> | 14 | 14 | - | MD 2.6 lower (9.94 lower to 4.74 higher) | <br>VERY LOW | IMPORTANT |
|---|-------------------|---------|-------------|-------------|---------------------------|-------------------|----|----|---|------------------------------------------|---------------------------------------------------------------------------------------------------|-----------|

**Liver Transplant Observational- Mortality**

| № of studies | Study design          | Certainty assessment |               |              |                           |                      | № of patients |                                  | Effect                  |                                               | Certainty                                                                                       | Importance |
|--------------|-----------------------|----------------------|---------------|--------------|---------------------------|----------------------|---------------|----------------------------------|-------------------------|-----------------------------------------------|-------------------------------------------------------------------------------------------------|------------|
|              |                       | Risk of bias         | Inconsistency | Indirectness | Imprecision               | Other considerations | Point of Care | Conventional testing (TEG/ROTEM) | Relative (95% CI)       | Absolute (95% CI)                             |                                                                                                 |            |
| 1            | observational studies | serious              | not serious   | not serious  | very serious <sup>e</sup> | none <sup>c</sup>    | 1/34 (2.9%)   | 1/34 (2.9%)                      | RR 1.00 (0.07 to 15.34) | 0 fewer per 1,000 (from 27 fewer to 422 more) | <br>VERY LOW | CRITICAL   |

#### Liver Transplant Observational-RBC Transfusion

|   |                       |         |             |             |                           |                   |               |               |                        |                                                 |                                                                                                 |           |
|---|-----------------------|---------|-------------|-------------|---------------------------|-------------------|---------------|---------------|------------------------|-------------------------------------------------|-------------------------------------------------------------------------------------------------|-----------|
| 1 | observational studies | serious | not serious | not serious | very serious <sup>e</sup> | none <sup>c</sup> | 28/34 (82.4%) | 33/34 (97.1%) | RR 0.85 (0.72 to 1.00) | 146 fewer per 1,000 (from 272 fewer to 0 fewer) | <br>VERY LOW | IMPORTANT |
|---|-----------------------|---------|-------------|-------------|---------------------------|-------------------|---------------|---------------|------------------------|-------------------------------------------------|-------------------------------------------------------------------------------------------------|-----------|

#### Liver Transplant Observational-Platelet Transfusion

|   |                       |         |             |             |                           |                   |               |               |                        |                                              |                                                                                                 |           |
|---|-----------------------|---------|-------------|-------------|---------------------------|-------------------|---------------|---------------|------------------------|----------------------------------------------|-------------------------------------------------------------------------------------------------|-----------|
| 1 | observational studies | serious | not serious | not serious | very serious <sup>e</sup> | none <sup>c</sup> | 27/34 (79.4%) | 19/34 (55.9%) | RR 1.42 (1.01 to 2.00) | 235 more per 1,000 (from 6 more to 559 more) | <br>VERY LOW | IMPORTANT |
|---|-----------------------|---------|-------------|-------------|---------------------------|-------------------|---------------|---------------|------------------------|----------------------------------------------|-------------------------------------------------------------------------------------------------|-----------|

#### Liver Transplant Observational-Cryoprecipitate Transfusions

|   |                       |         |             |             |                           |                   |               |               |                        |                                                |                                                                                                   |           |
|---|-----------------------|---------|-------------|-------------|---------------------------|-------------------|---------------|---------------|------------------------|------------------------------------------------|---------------------------------------------------------------------------------------------------|-----------|
| 1 | observational studies | serious | not serious | not serious | very serious <sup>e</sup> | none <sup>c</sup> | 25/34 (73.5%) | 19/34 (55.9%) | RR 1.32 (0.92 to 1.89) | 179 more per 1,000 (from 45 fewer to 497 more) | <br>VERY LOW | IMPORTANT |
|---|-----------------------|---------|-------------|-------------|---------------------------|-------------------|---------------|---------------|------------------------|------------------------------------------------|---------------------------------------------------------------------------------------------------|-----------|

CI: Confidence interval; RR: Risk ratio; MD: Mean difference

## Explanations

- a. Rated down for indirectness- one study was portal hypertensive bleeding, the other for non-portal hypertensive bleeding in cirrhotic patients
- b. Rated down as for confidence intervals overlap, and encompasses 1.
- c. Publication bias not formally assessed due to the limited number of studies identified
- d. Rated down for substantial heterogeneity
- e. Rated down for overlapping confidence intervals and few number of events
- f. Rated down for few number of events and small sample size
- g. rated down for wide variance in point estimates and substantial heterogeneity

## Evidence Summary

### Non-massively bleeding patients

### CV Surgery

## Mortality

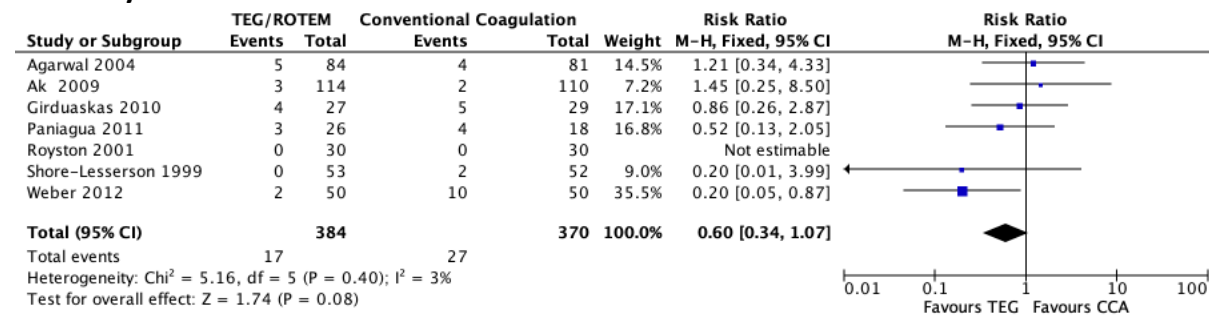

## Redo Surgery

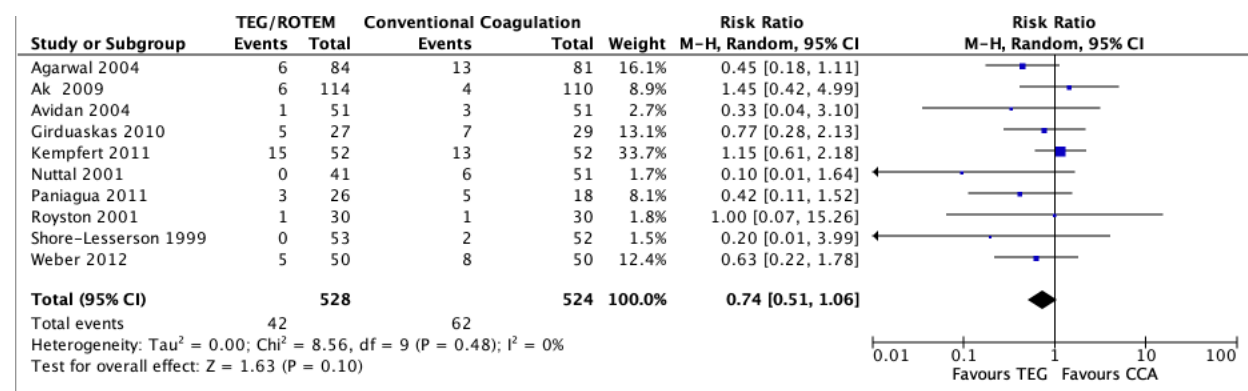

## RBC transfusions

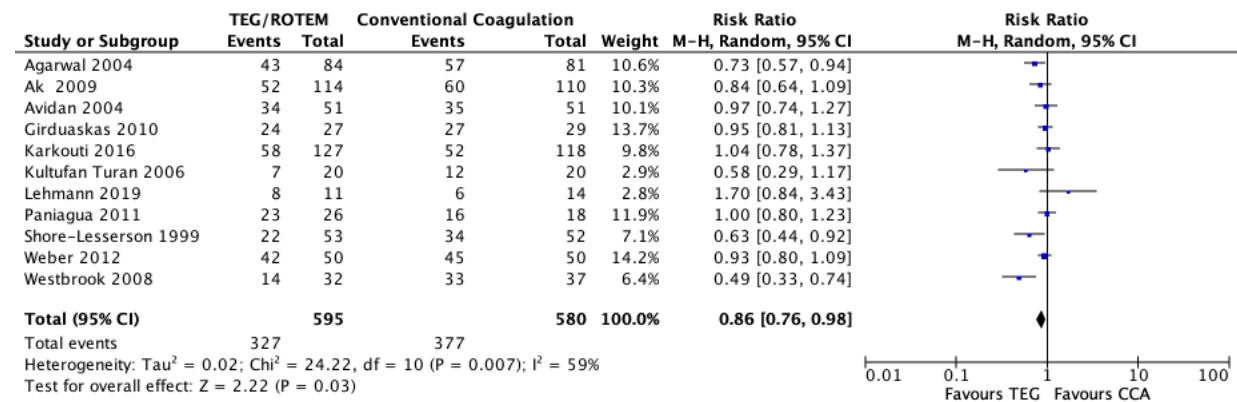

## Platelet transfusions

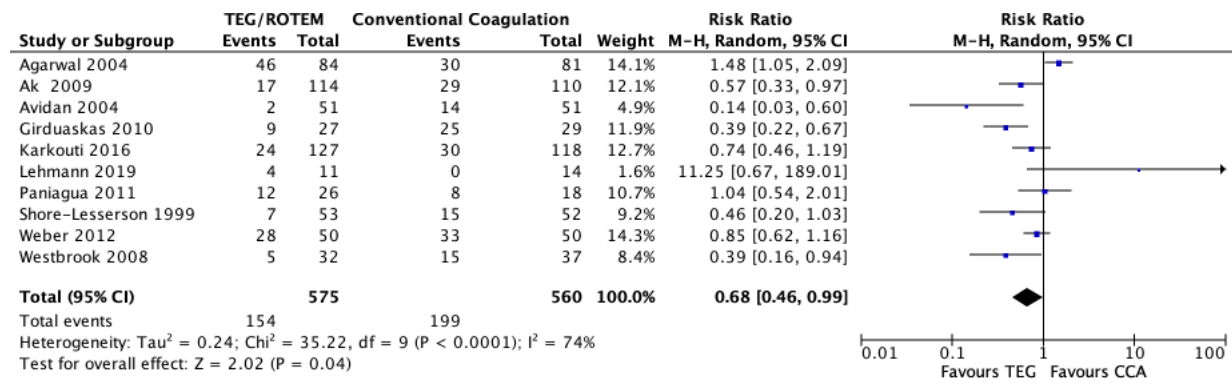

## FFP Transfusions

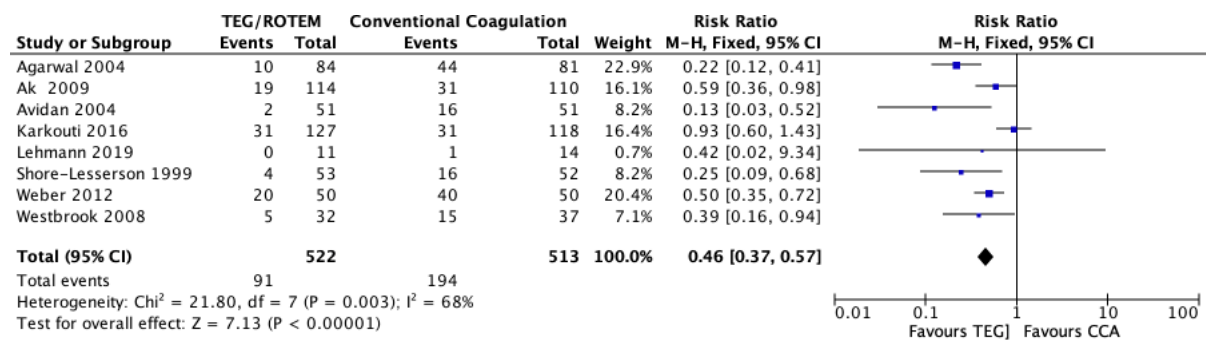

## Cryoprecipitate Transfusion

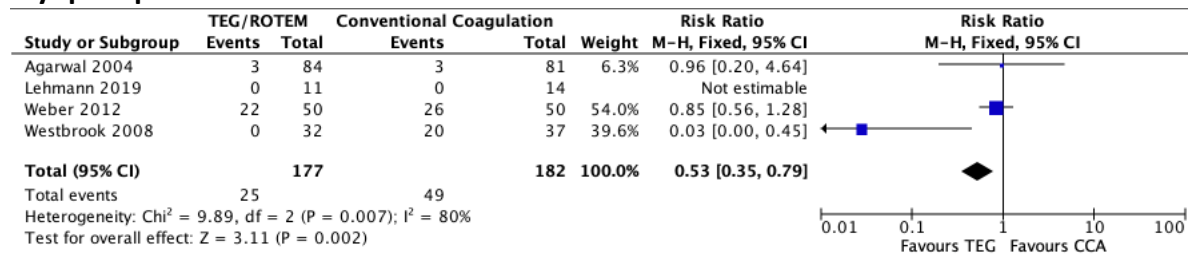

## Hemostasis- 12 hour post op bleeding

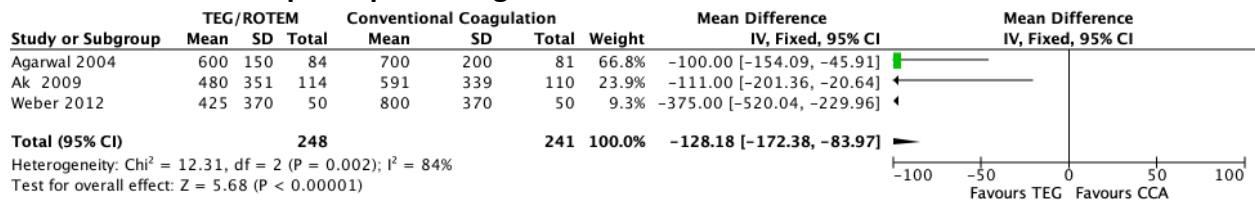

## Hemostasis-24hr post op bleeding

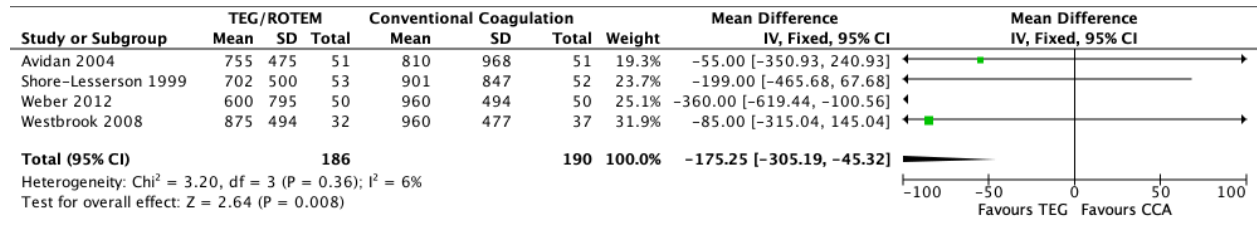

## ICU LOS

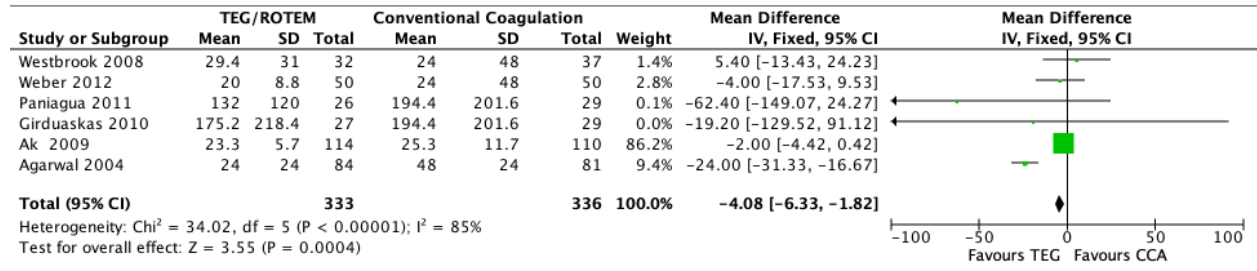

## Hospital LOS

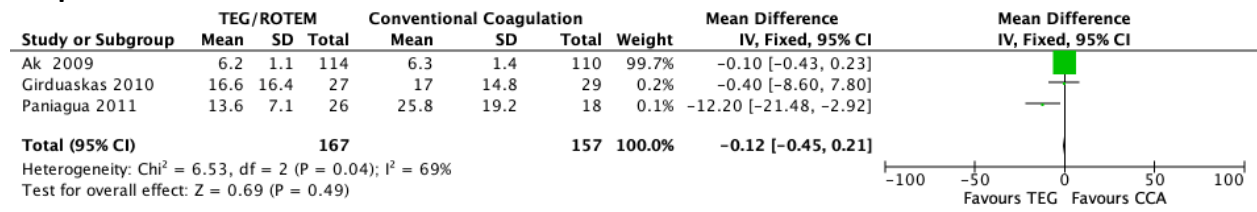

## Duration of Mechanical Ventilation (For your information only, not an included outcome)

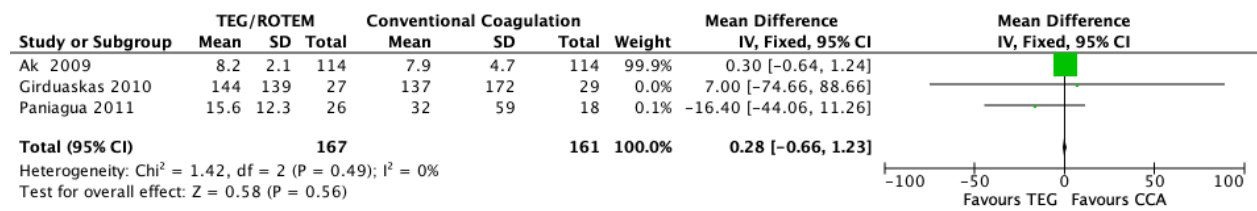

## ECMO

### Mortality

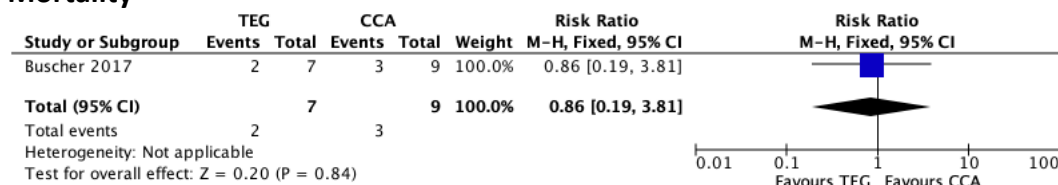

### Rebleeding

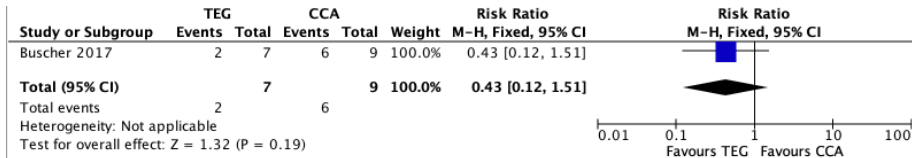

## Thrombotic Complications

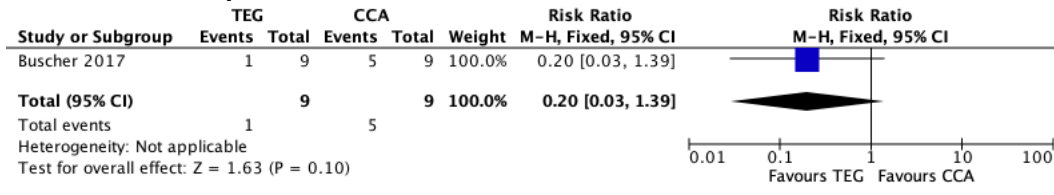

## Massively Bleeding

### GI-Cirrhotic Bleeding (variceal/nonvariceal)

#### Mortality

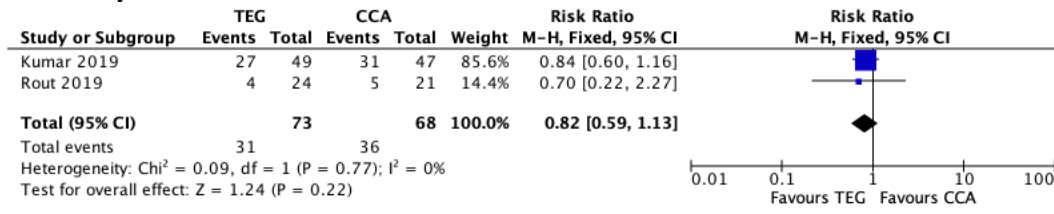

#### Rebleeding

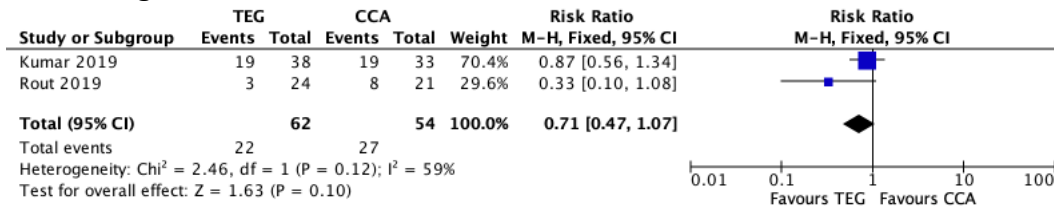

#### TRALI

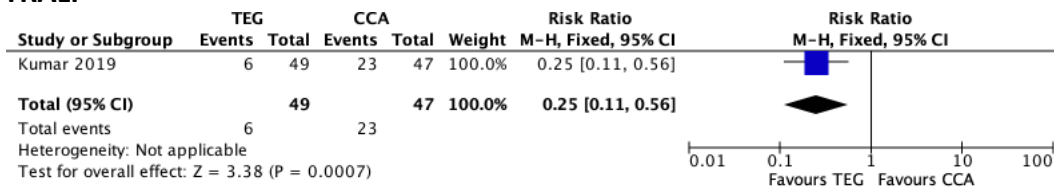

#### TACO

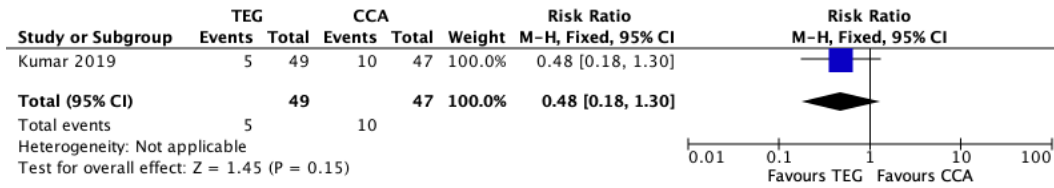

#### ARDS



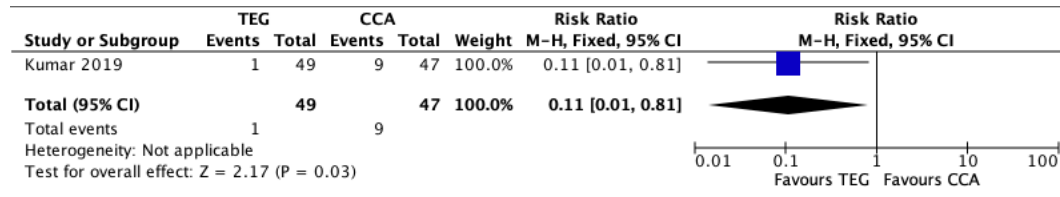

## RBC Transfusion

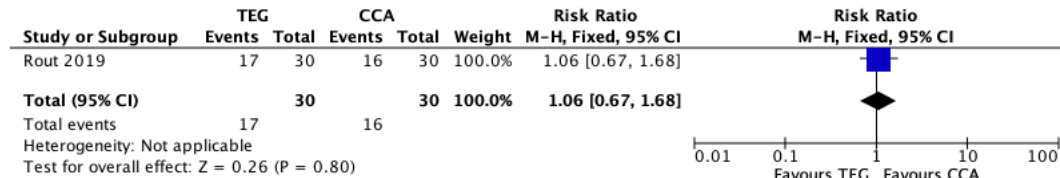

## Platelet Transfusion

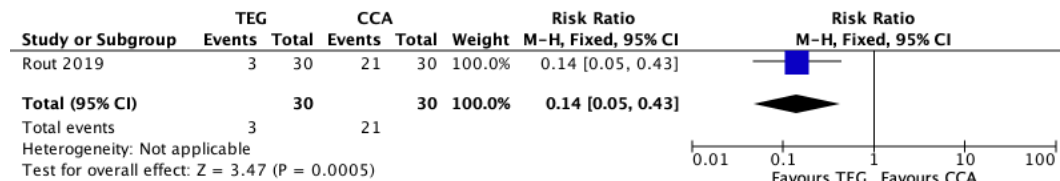

## FFP Transfusion

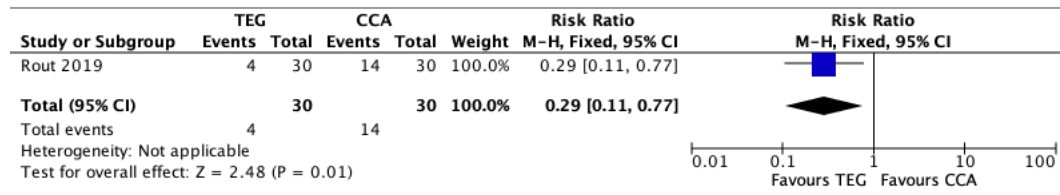

## Trauma

### Mortality

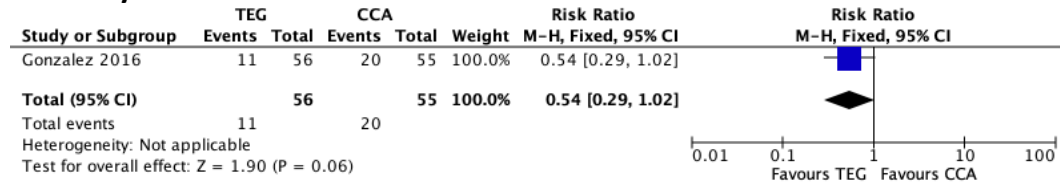

## Liver Transplant

### Mortality

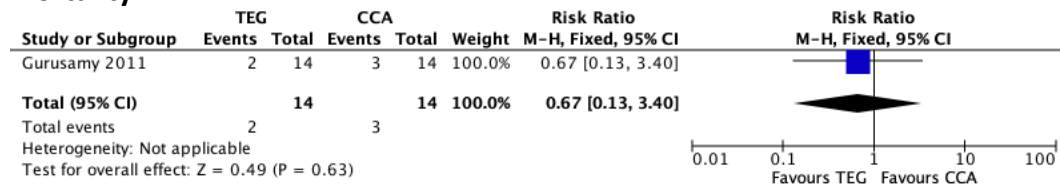

## Blood Loss

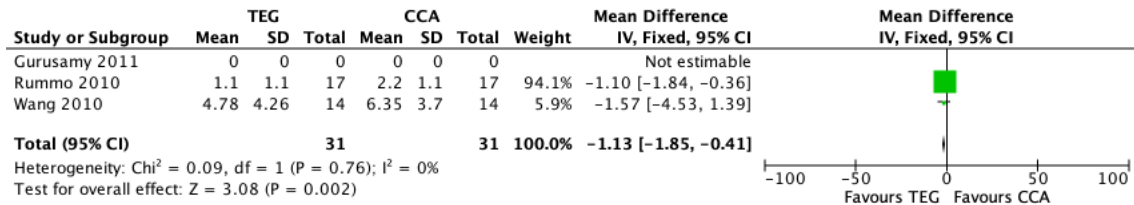

## RBC Transfusion

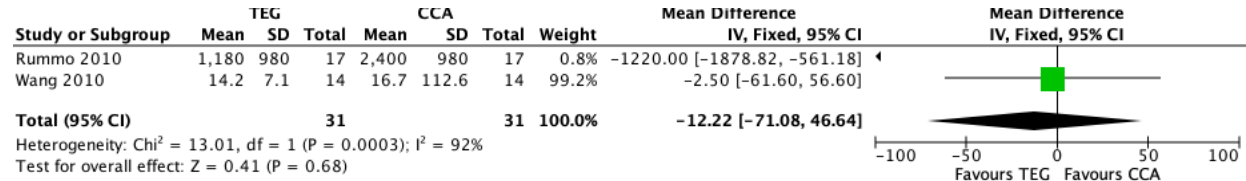

## Platelet Transfusion

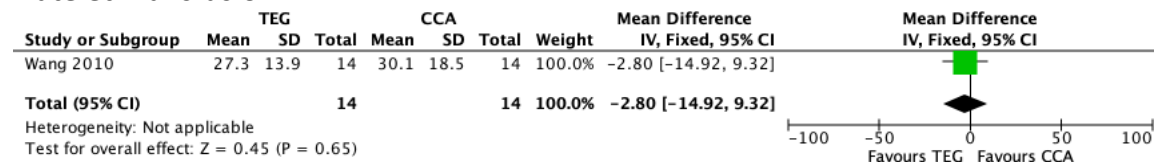

## FFP Transfusions

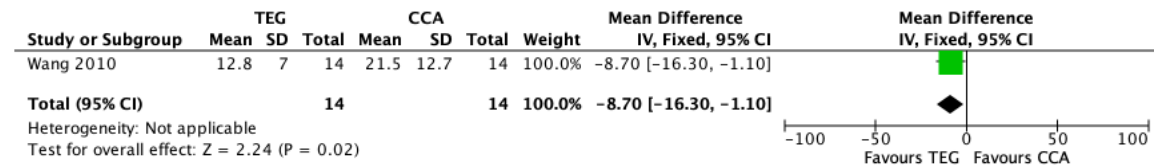

## Cryoprecipitate Transfusion

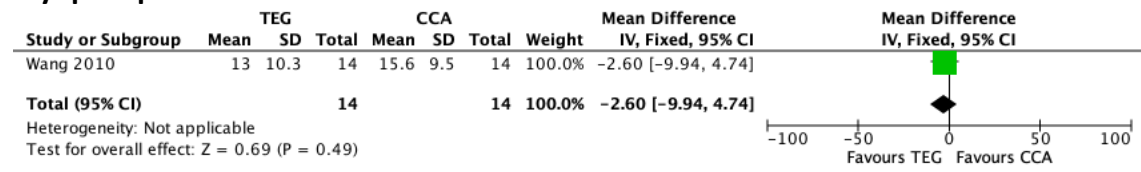

## Liver Transplant- Observational

### Mortality

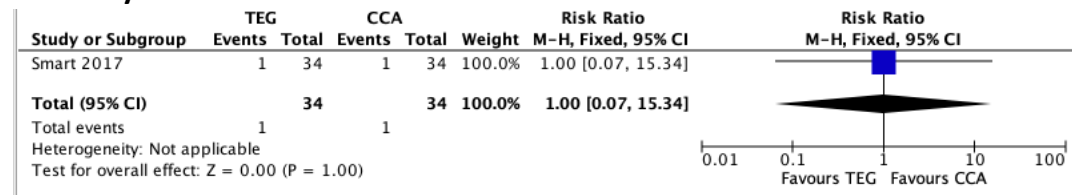

### RBC Transfusion

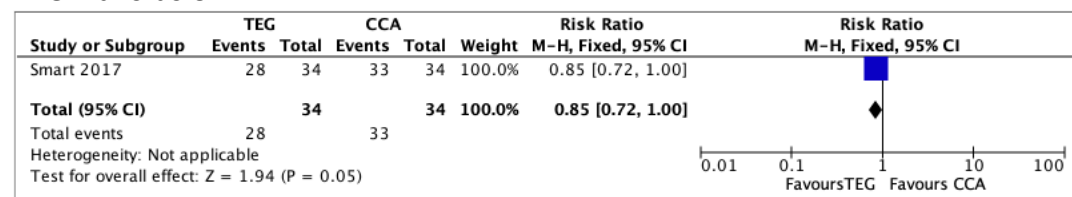

### Platelet Transfusion

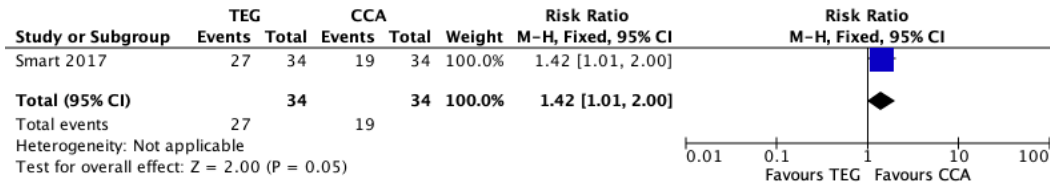

### Cryoprecipitate Transfusion

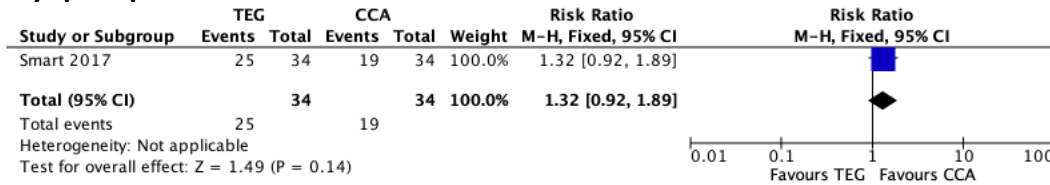

**Evidence Summary 6: Red blood cell transfusion in non-massively bleeding, critically ill adults**

## Restrictive vs. liberal RBC transfusion in non-massively bleeding patients

### 1. GI Bleeding

| Certainty assessment                                   |                      |               |                      |                           |       | № of patients  |                | Effect                 |                                                          | Certainty        | Importance |
|--------------------------------------------------------|----------------------|---------------|----------------------|---------------------------|-------|----------------|----------------|------------------------|----------------------------------------------------------|------------------|------------|
| № of studies                                           | Risk of bias         | Inconsistency | Indirectness         | Imprecision               | Other | Restrictive    | Liberal        | Relative (95% CI)      | Absolute (95% CI)                                        |                  |            |
| <b>Mortality - GI bleeding</b>                         |                      |               |                      |                           |       |                |                |                        |                                                          |                  |            |
| 4 RCTs                                                 | not serious          | not serious   | not serious          | serious <sup>a</sup>      | none  | 37/741 (5.0%)  | 68/865 (7.9%)  | RR 0.63 (0.43 to 0.93) | <b>29 fewer per 1,000</b><br>(from 45 fewer to 6 fewer)  | ⊕⊕⊕○<br>MODERATE | CRITICAL   |
| <b>Quality of life - GI bleeding</b>                   |                      |               |                      |                           |       |                |                |                        |                                                          |                  |            |
| 1 RCT                                                  | serious <sup>b</sup> | not serious   | not serious          | serious <sup>c</sup>      | none  | 257            | 383            | -                      | MD 0.07 lower<br>(0.12 lower to 0.02 lower)              | ⊕⊕○○<br>LOW      | CRITICAL   |
| <b>Stroke - GI bleeding</b>                            |                      |               |                      |                           |       |                |                |                        |                                                          |                  |            |
| 2 RCTs                                                 | not serious          | not serious   | not serious          | serious <sup>d</sup>      | none  | 12/701 (1.7%)  | 29/828 (3.5%)  | RR 0.56 (0.29 to 1.09) | <b>15 fewer per 1,000</b><br>(from 25 fewer to 3 more)   | ⊕⊕⊕○<br>MODERATE | CRITICAL   |
| <b>Myocardial infarction - GI bleeding</b>             |                      |               |                      |                           |       |                |                |                        |                                                          |                  |            |
| 1 RCT                                                  | not serious          | not serious   | not serious          | very serious <sup>e</sup> | none  | 8/444 (1.8%)   | 13/445 (2.9%)  | RR 0.62 (0.26 to 1.47) | <b>11 fewer per 1,000</b><br>(from 22 fewer to 14 more)  | ⊕⊕○○<br>LOW      | CRITICAL   |
| <b>Acute kidney injury - GI bleeding</b>               |                      |               |                      |                           |       |                |                |                        |                                                          |                  |            |
| 1 RCT                                                  | not serious          | not serious   | serious <sup>f</sup> | serious <sup>d</sup>      | none  | 78/444 (17.6%) | 97/445 (21.8%) | RR 0.81 (0.62 to 1.05) | <b>41 fewer per 1,000</b><br>(from 83 fewer to 11 more)  | ⊕⊕○○<br>LOW      | CRITICAL   |
| <b>Volume overload/TACO - GI bleeding</b>              |                      |               |                      |                           |       |                |                |                        |                                                          |                  |            |
| 1 RCT                                                  | not serious          | not serious   | not serious          | serious <sup>g</sup>      | none  | 2/444 (0.5%)   | 16/445 (3.6%)  | RR 0.13 (0.03 to 0.54) | <b>31 fewer per 1,000</b><br>(from 35 fewer to 17 fewer) | ⊕⊕⊕○<br>MODERATE | CRITICAL   |
| <b>Post-transfusion sepsis/infection - GI bleeding</b> |                      |               |                      |                           |       |                |                |                        |                                                          |                  |            |

## Restrictive vs. liberal RBC transfusion in non-massively bleeding patients

|                                                       |                      |                          |             |                      |      |                    |                        |                                  |                                                            |                  |           |
|-------------------------------------------------------|----------------------|--------------------------|-------------|----------------------|------|--------------------|------------------------|----------------------------------|------------------------------------------------------------|------------------|-----------|
| 2 RCTs                                                | not serious          | not serious              | not serious | serious <sup>d</sup> | none | 186/701<br>(26.5%) | 227/82<br>8<br>(27.4%) | <b>RR 0.95</b><br>(0.81 to 1.13) | <b>14 fewer per 1,000</b><br>(from 52 fewer to 36 more)    | ⊕⊕⊕○<br>MODERATE | IMPORTANT |
| <b>Rebleeding - GI bleeding</b>                       |                      |                          |             |                      |      |                    |                        |                                  |                                                            |                  |           |
| 4 RCTs                                                | not serious          | not serious              | not serious | not serious          | none | 65/759<br>(8.6%)   | 117/88<br>3<br>(13.3%) | <b>RR 0.61</b><br>(0.46 to 0.81) | <b>52 fewer per 1,000</b><br>(from 72 fewer to 25 fewer)   | ⊕⊕⊕⊕<br>HIGH     | IMPORTANT |
| <b>Transfusion reaction - GI bleeding</b>             |                      |                          |             |                      |      |                    |                        |                                  |                                                            |                  |           |
| 2 RCTs                                                | serious <sup>h</sup> | not serious              | not serious | serious <sup>g</sup> | none | 16/701<br>(2.3%)   | 47/828<br>(5.7%)       | <b>RR 0.36</b><br>(0.21 to 0.63) | <b>36 fewer per 1,000</b><br>(from 45 fewer to 21 fewer)   | ⊕⊕○○<br>LOW      | IMPORTANT |
| <b>Hospital length of stay - GI bleeding</b>          |                      |                          |             |                      |      |                    |                        |                                  |                                                            |                  |           |
| 2 RCTs                                                | not serious          | not serious              | not serious | not serious          | none | 701                | 828                    | -                                | <b>MD 1.12 lower</b><br>(1.66 lower to 0.59 lower)         | ⊕⊕⊕⊕<br>HIGH     | IMPORTANT |
| <b>Mean transfusions - GI bleeding</b>                |                      |                          |             |                      |      |                    |                        |                                  |                                                            |                  |           |
| 4 RCTs                                                | not serious          | not serious <sup>i</sup> | not serious | not serious          | none | 741                | 865                    | -                                | <b>MD 1.88 lower</b><br>(2.37 lower to 1.39 lower)         | ⊕⊕⊕⊕<br>HIGH     | IMPORTANT |
| <b>Proportion receiving transfusion - GI bleeding</b> |                      |                          |             |                      |      |                    |                        |                                  |                                                            |                  |           |
| 2 RCTs                                                | not serious          | not serious <sup>i</sup> | not serious | not serious          | none | 351/701<br>(50.1%) | 630/82<br>8<br>(76.1%) | <b>RR 0.67</b><br>(0.48 to 0.94) | <b>251 fewer per 1,000</b><br>(from 396 fewer to 46 fewer) | ⊕⊕⊕⊕<br>HIGH     | IMPORTANT |

CI: Confidence interval; RR: Risk ratio; MD: Mean difference

### Explanations

- Actual number of events is small. Given control group event rate of ~8% and RRR of 37%, the optimal information size is not met, resulting in serious imprecision.
- Significant loss to follow-up for EQ-5D scores in single trial reporting quality of life outcomes.
- Not statistically significant when restricted to patients with Hb <120, or in cluster-adjusted analyses.
- Wide confidence intervals which do not exclude the possibility of significant harm, resulting in serious imprecision.
- Very small number of events, resulting in very serious imprecision.
- Unclear definition of kidney injury, or patient relevance, in single study reporting this outcome.
- Though statistically significant, optimal information size is not met, resulting in serious imprecision.
- Lack of blinding bedside clinicians may result in under-reporting transfusion reactions in restrictive arm.
- Though statistical heterogeneity is present, it is of questionable relevance as all trials favour restrictive transfusion.

## Restrictive vs. liberal RBC transfusion in non-massively bleeding patients

### 2. Obstetric bleeding

| Certainty assessment                                          |                      |               |              |                           |       | № of patients    |                  | Effect                    |                                                  | Certainty        | Importance |
|---------------------------------------------------------------|----------------------|---------------|--------------|---------------------------|-------|------------------|------------------|---------------------------|--------------------------------------------------|------------------|------------|
| № of studies                                                  | Risk of bias         | Inconsistency | Indirectness | Imprecision               | Other | Restrictive      | Liberal          | Relative (95% CI)         | Absolute (95% CI)                                |                  |            |
| <b>Quality of life - Obstetric bleeding</b>                   |                      |               |              |                           |       |                  |                  |                           |                                                  |                  |            |
| 1 RCT                                                         | serious <sup>a</sup> | not serious   | not serious  | serious <sup>b</sup>      | none  | 262              | 259              | -                         | MD 0.1 lower<br>(3.5 lower to 3.3 higher)        | ⊕⊕○○<br>LOW      | CRITICAL   |
| <b>Venous thrombosis - Obstetric bleeding</b>                 |                      |               |              |                           |       |                  |                  |                           |                                                  |                  |            |
| 1 RCT                                                         | not serious          | not serious   | not serious  | very serious <sup>c</sup> | none  | 2/262<br>(0.8%)  | 2/259<br>(0.8%)  | RR 0.99<br>(0.14 to 6.97) | 0 fewer per 1,000<br>(from 7 fewer to 46 more)   | ⊕⊕○○<br>LOW      | IMPORTANT  |
| <b>Post-transfusion sepsis/infection - Obstetric bleeding</b> |                      |               |              |                           |       |                  |                  |                           |                                                  |                  |            |
| 1 RCT                                                         | not serious          | not serious   | not serious  | very serious <sup>c</sup> | none  | 24/262<br>(9.2%) | 22/259<br>(8.5%) | RR 1.08<br>(0.62 to 1.87) | 7 more per 1,000<br>(from 32 fewer to 74 more)   | ⊕⊕○○<br>LOW      | IMPORTANT  |
| <b>Transfusion reaction - Obstetric bleeding</b>              |                      |               |              |                           |       |                  |                  |                           |                                                  |                  |            |
| 1 RCT                                                         | serious <sup>d</sup> | not serious   | not serious  | very serious <sup>c</sup> | none  | 0/262<br>(0.0%)  | 3/259<br>(1.2%)  | RR 0.14<br>(0.01 to 2.72) | 10 fewer per 1,000<br>(from 11 fewer to 20 more) | ⊕○○○<br>VERY LOW | IMPORTANT  |
| <b>Mean transfusions - Obstetric bleeding</b>                 |                      |               |              |                           |       |                  |                  |                           |                                                  |                  |            |
| 1 RCT                                                         | not serious          | not serious   | not serious  | serious <sup>c</sup>      | none  | 262              | 259              | -                         | MD 2 higher<br>(0 to 0)                          | ⊕⊕⊕○<br>MODERATE | IMPORTANT  |

CI: Confidence interval; RR: Risk ratio; MD: Mean difference

#### Explanations

- Patients were not blinded which may have impacted assessment of quality of life using SF-36.
- Wide confidence intervals which do not exclude the possibility of significant harm, resulting in serious imprecision.
- Very small number of events, resulting in very serious imprecision.
- Lack of blinding bedside clinicians may result in under-reporting transfusion reactions in restrictive arm.

## Restrictive vs. liberal RBC transfusion in non-massively bleeding patients

### 3. Vascular surgery

| Certainty assessment                                       |                      |               |              |                           |       | № of patients |                | Effect                            |                                                             | Certainty        | Importance |
|------------------------------------------------------------|----------------------|---------------|--------------|---------------------------|-------|---------------|----------------|-----------------------------------|-------------------------------------------------------------|------------------|------------|
| № of studies                                               | Risk of bias         | Inconsistency | Indirectness | Imprecision               | Other | Restrictive   | Liberal        | Relative (95% CI)                 | Absolute (95% CI)                                           |                  |            |
| <b>Mortality - Vascular surgery</b>                        |                      |               |              |                           |       |               |                |                                   |                                                             |                  |            |
| 1 RCT                                                      | not serious          | not serious   | not serious  | very serious <sup>a</sup> | none  | 2/29 (6.9%)   | 1/29 (3.4%)    | <b>RR 2.00</b><br>(0.19 to 20.86) | <b>34 more per 1,000</b><br>(from 28 fewer to 685 more)     | ⊕⊕○○<br>LOW      | CRITICAL   |
| <b>Myocardial infarction - Vascular surgery</b>            |                      |               |              |                           |       |               |                |                                   |                                                             |                  |            |
| 1 RCT                                                      | not serious          | not serious   | not serious  | very serious <sup>a</sup> | none  | 2/29 (6.9%)   | 2/29 (6.9%)    | <b>RR 1.00</b><br>(0.15 to 6.63)  | <b>0 fewer per 1,000</b><br>(from 59 fewer to 388 more)     | ⊕⊕○○<br>LOW      | CRITICAL   |
| <b>Transfusion reaction - Vascular surgery</b>             |                      |               |              |                           |       |               |                |                                   |                                                             |                  |            |
| 1 RCT                                                      | serious <sup>b</sup> | not serious   | not serious  | very serious <sup>a</sup> | none  | 0/29 (0.0%)   | 1/29 (3.4%)    | <b>RR 0.33</b><br>(0.01 to 7.86)  | <b>23 fewer per 1,000</b><br>(from 34 fewer to 237 more)    | ⊕○○○<br>VERY LOW | IMPORTANT  |
| <b>Mean transfusions - Vascular surgery</b>                |                      |               |              |                           |       |               |                |                                   |                                                             |                  |            |
| 1 RCT                                                      | not serious          | not serious   | not serious  | not serious               | none  | 29            | 29             | -                                 | <b>MD 2 lower</b><br>(3.22 lower to 0.78 lower)             | ⊕⊕⊕⊕<br>HIGH     | IMPORTANT  |
| <b>Proportion receiving transfusion - Vascular surgery</b> |                      |               |              |                           |       |               |                |                                   |                                                             |                  |            |
| 1 RCT                                                      | not serious          | not serious   | not serious  | not serious               | none  | 19/29 (65.5%) | 29/29 (100.0%) | <b>RR 0.66</b><br>(0.51 to 0.86)  | <b>340 fewer per 1,000</b><br>(from 490 fewer to 140 fewer) | ⊕⊕⊕⊕<br>HIGH     | IMPORTANT  |

CI: Confidence interval; RR: Risk ratio; MD: Mean difference

#### Explanations

a. Very small number of events, resulting in very serious imprecision.

b. Lack of blinding bedside clinicians may result in under-reporting transfusion reactions in restrictive arm.





## Restrictive vs. liberal RBC transfusion in non-massively bleeding patients

### 3. Stroke

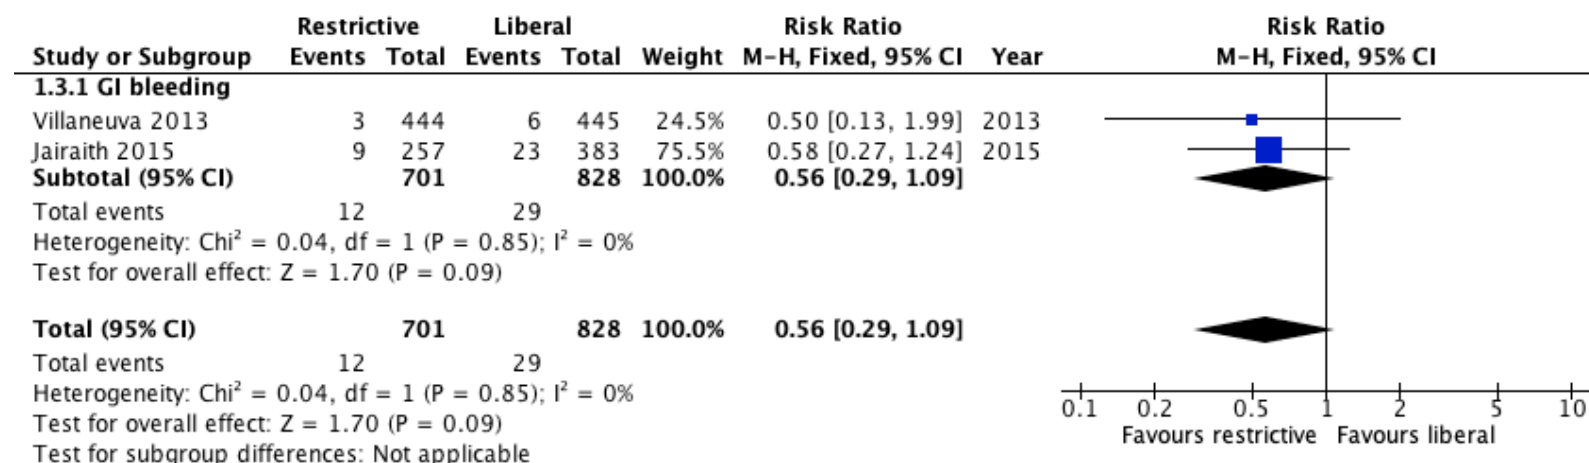

### 4. Myocardial infarction

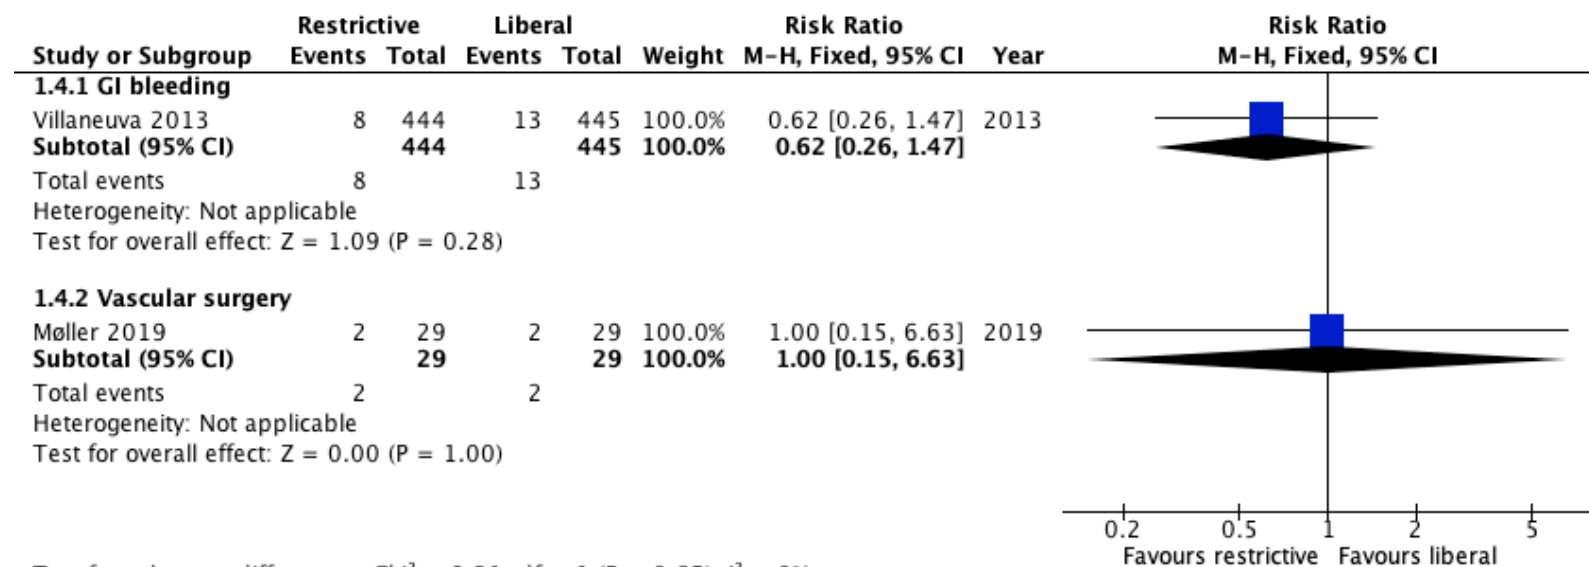

Test for subgroup differences: Chi<sup>2</sup> = 0.21, df = 1 (P = 0.65), I<sup>2</sup> = 0%

## Restrictive vs. liberal RBC transfusion in non-massively bleeding patients

### 5. ARDS/TRALI - no studies identified

### 6. Acute kidney injury (AKI not specified in Villaneuva 2013; need for RRT in Moller 2019)

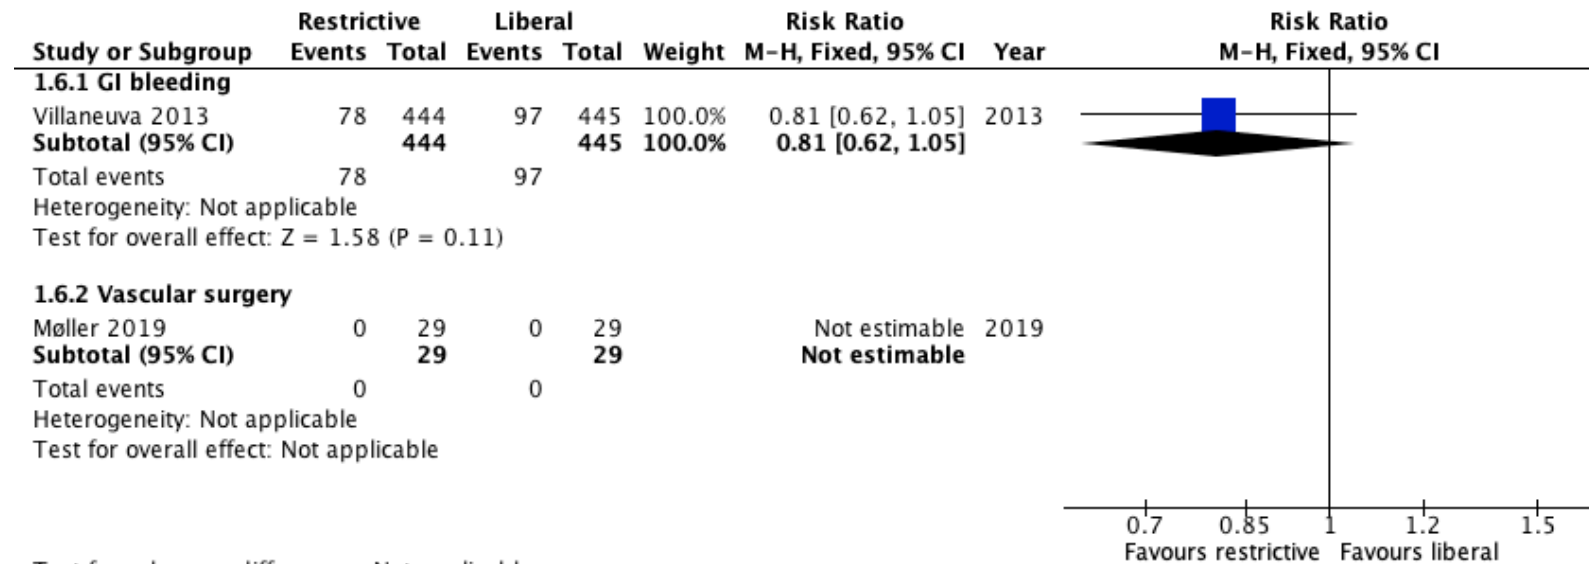

### 7. Volume overload/TACO

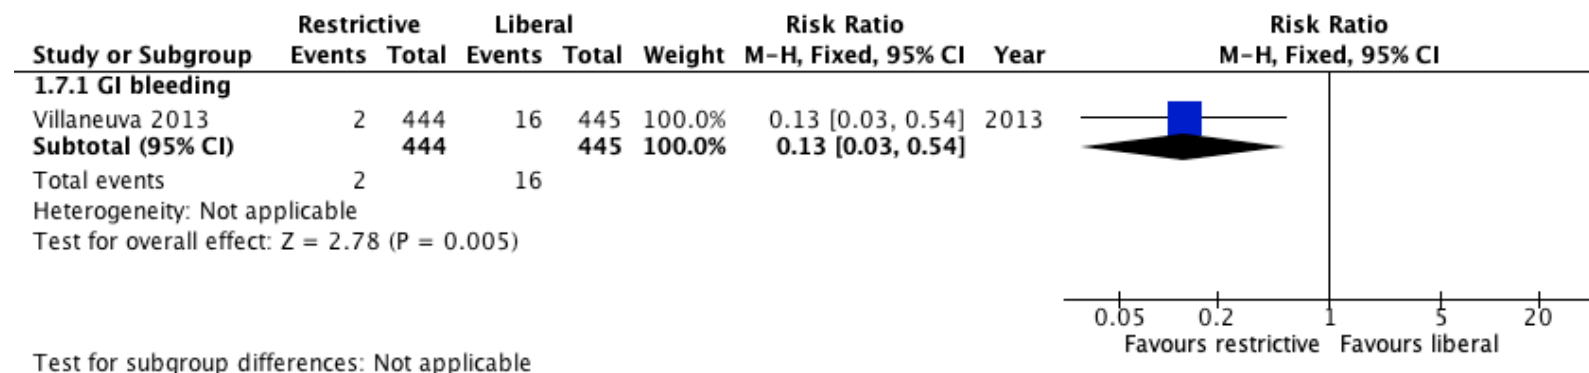

## Restrictive vs. liberal RBC transfusion in non-massively bleeding patients

### 8. Venous thrombosis

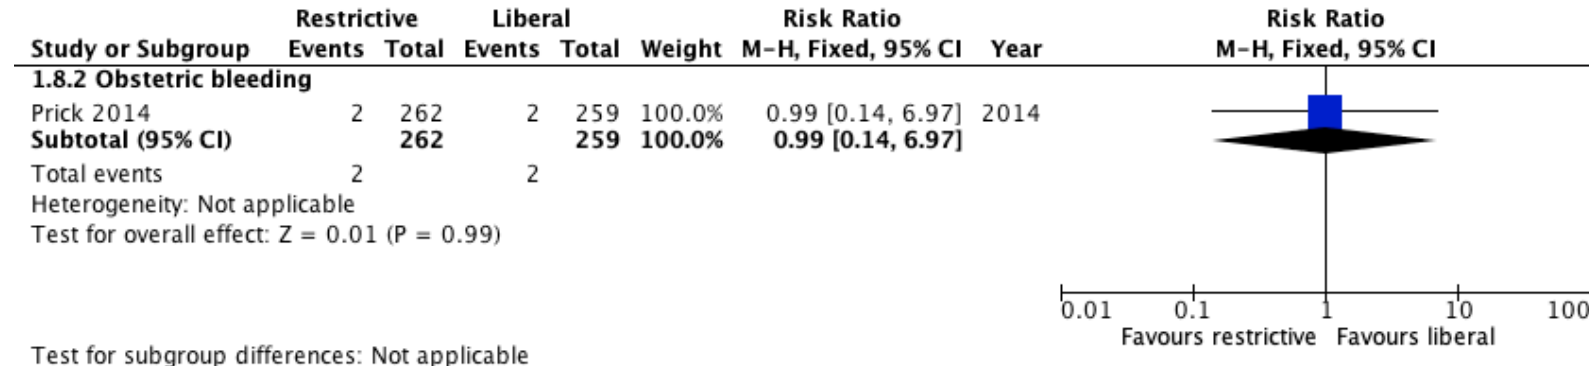

### 9. Post-transfusion sepsis/infection

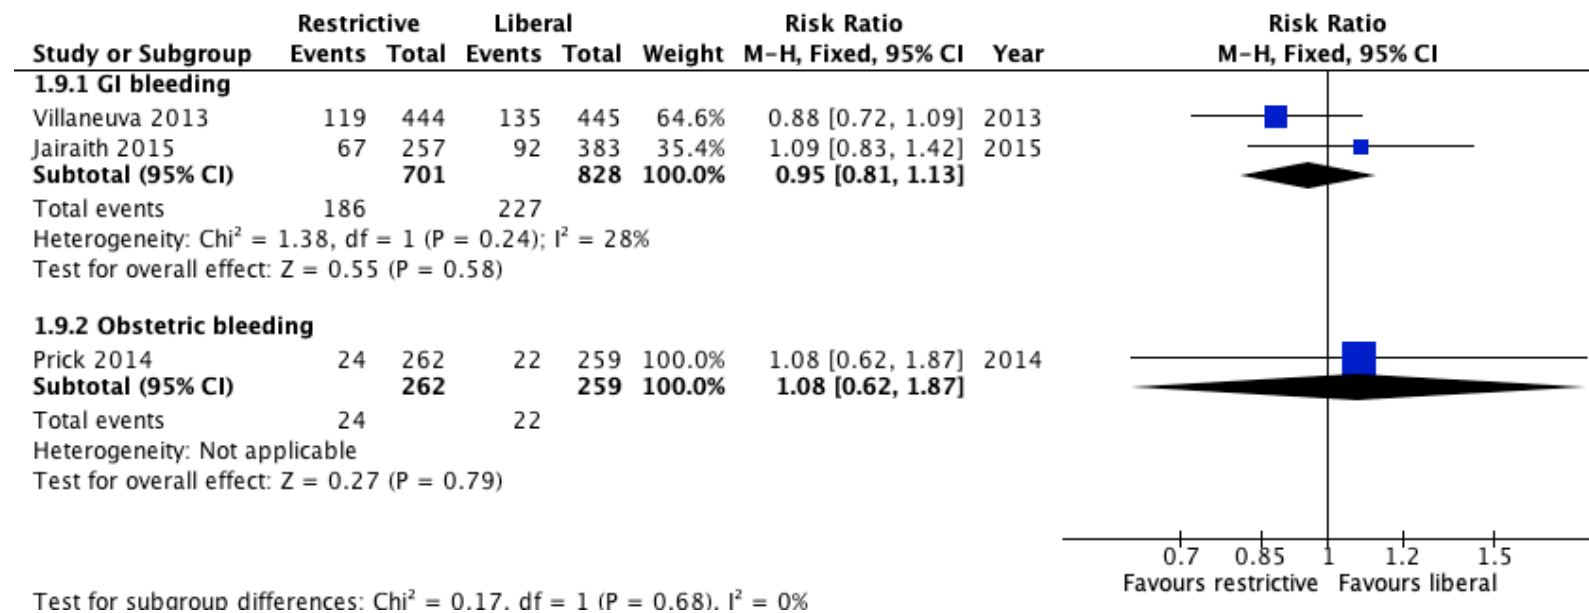

## Restrictive vs. liberal RBC transfusion in non-massively bleeding patients

### 10. Rebleeding (clinical hemostasis)

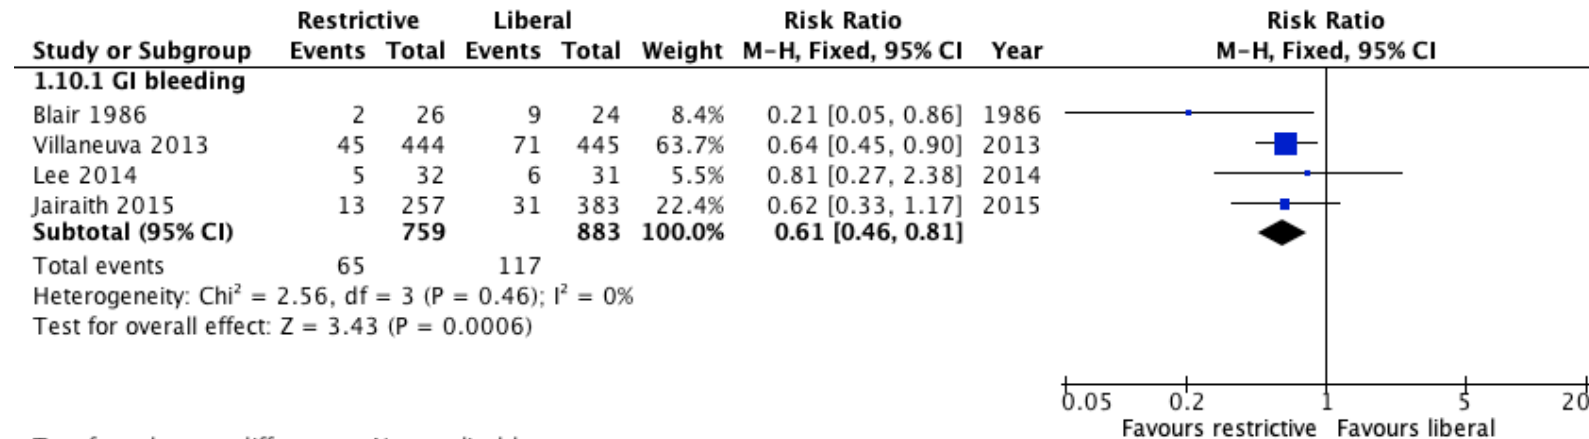

### 11. Transfusion reaction

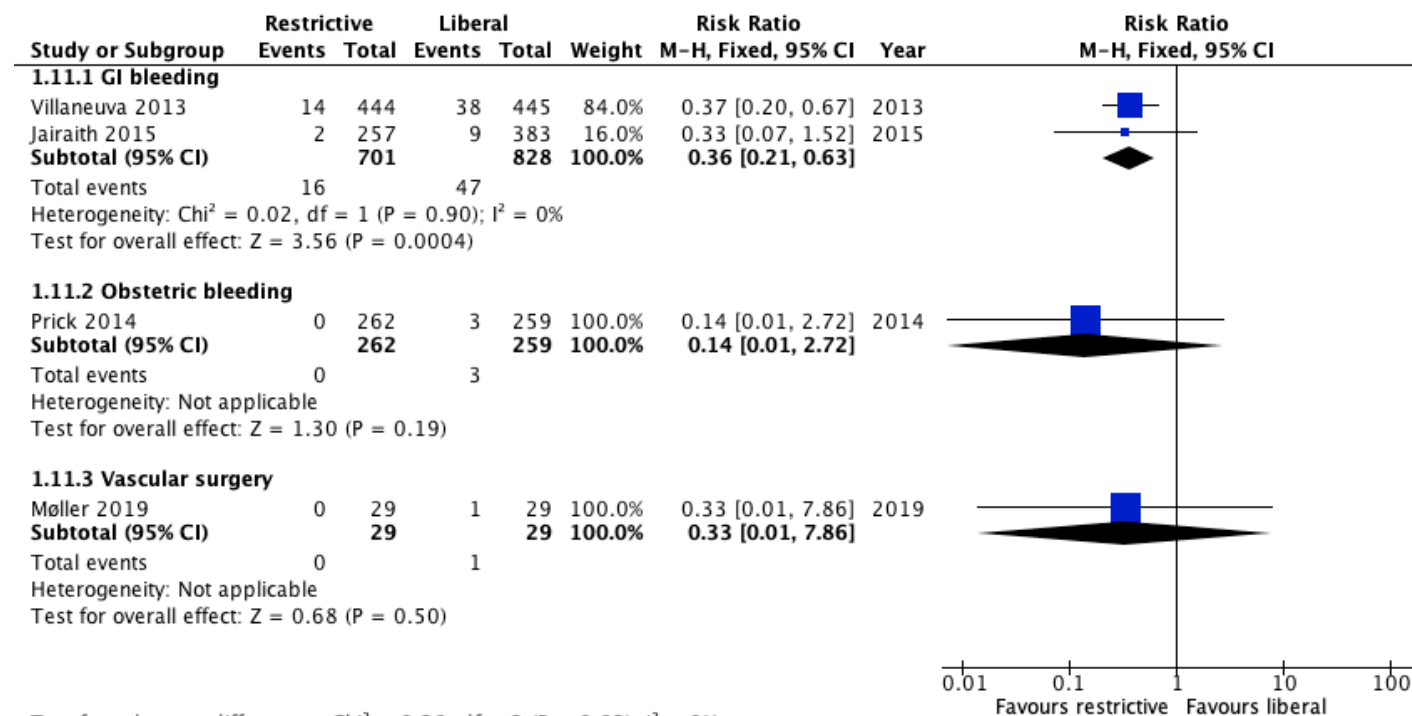

Test for subgroup differences:  $\text{Chi}^2 = 0.38$ ,  $\text{df} = 2$  ( $P = 0.83$ ),  $I^2 = 0\%$

## Restrictive vs. liberal RBC transfusion in non-massively bleeding patients

### 12. Hospital length of stay

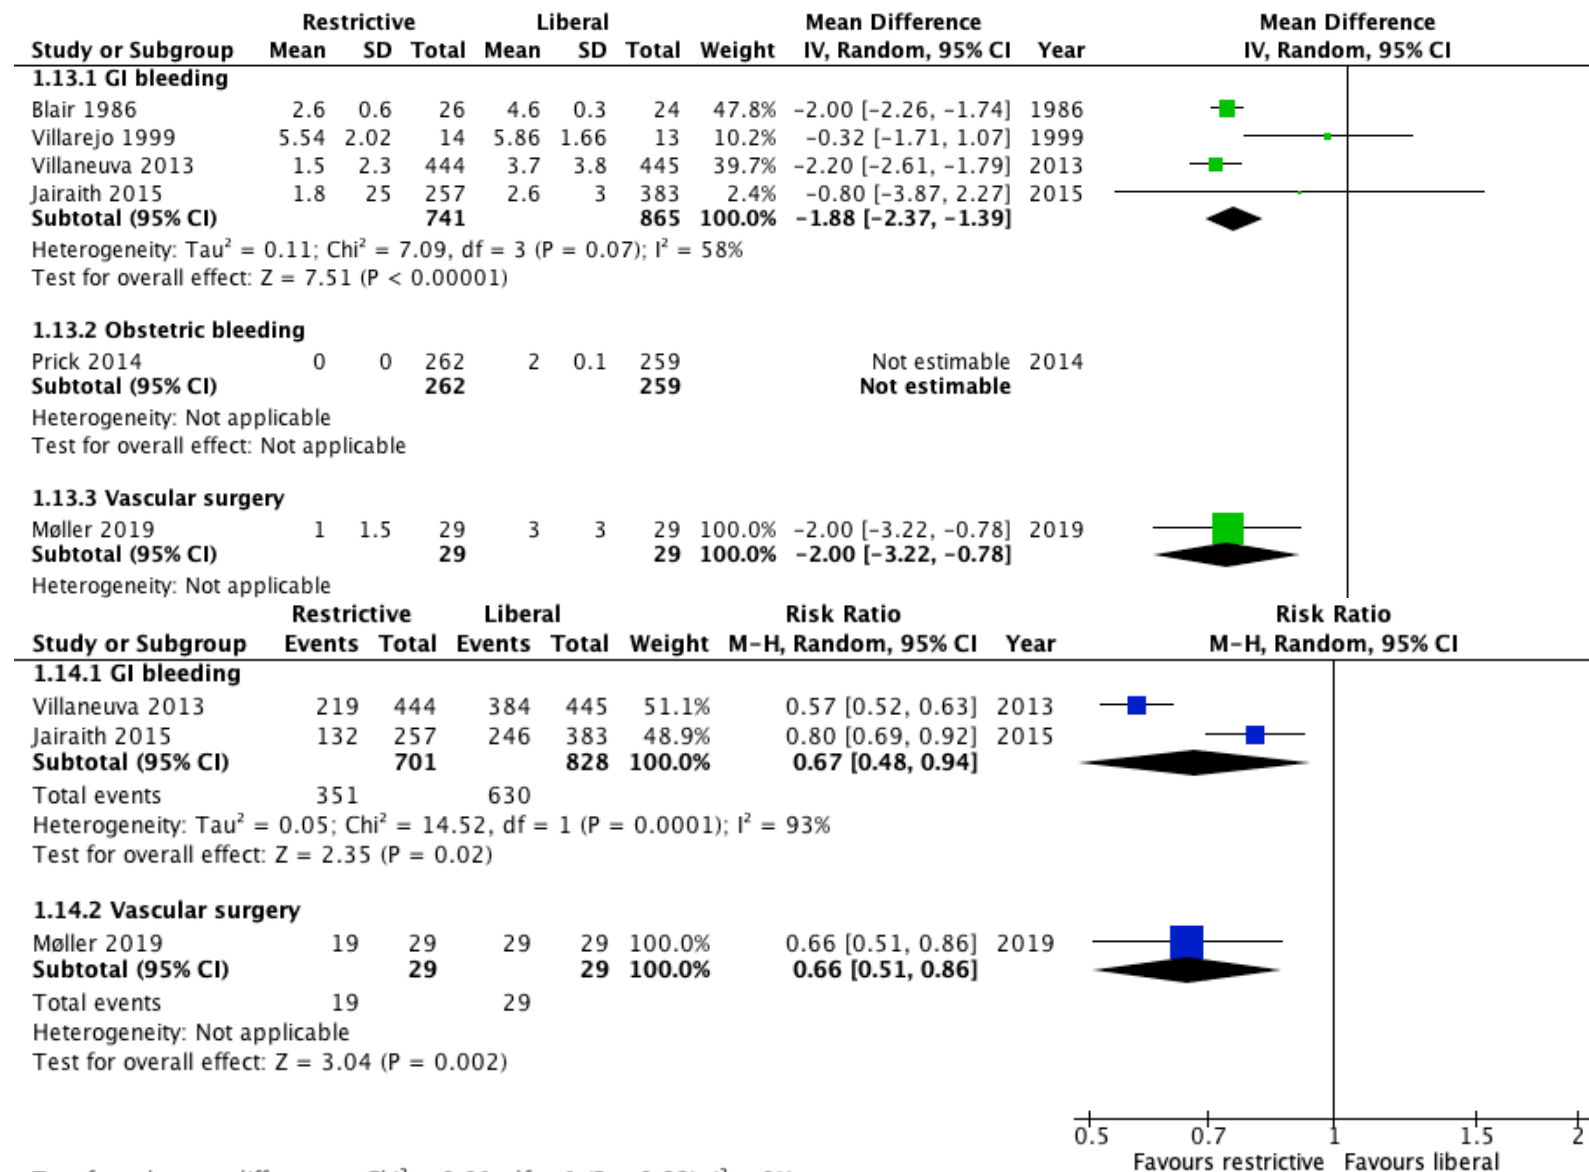

13. Mean number of transfusions

14. Proportion of patients receiving transfusion

Test for subgroup differences: Chi<sup>2</sup> = 0.01, df = 1 (P = 0.93), I<sup>2</sup> = 0%

**Evidence Summary 7: Platelet transfusion in non-massively bleeding, critically ill adults**

*See Evidence Summary 2 for cold-stored platelets in non-massively bleeding critically ill adults*

## Restrictive vs. Liberal Platelet Transfusion Strategy- Evidence Summaries

Restrictive platelet transfusions compared to liberal platelet transfusion for non-massively bleeding patients on anti-platelet therapy

| Certainty assessment                         |                   |              |               |              |                      |                      | N <sub>o</sub> of patients        |                              | Effect                           |                                                           | Certainty        | Importance |
|----------------------------------------------|-------------------|--------------|---------------|--------------|----------------------|----------------------|-----------------------------------|------------------------------|----------------------------------|-----------------------------------------------------------|------------------|------------|
| N <sub>o</sub> of studies                    | Study design      | Risk of bias | Inconsistency | Indirectness | Imprecision          | Other considerations | Restrictive platelet transfusions | liberal platelet transfusion | Relative (95% CI)                | Absolute (95% CI)                                         |                  |            |
| <b>Mortality (3 month)</b>                   |                   |              |               |              |                      |                      |                                   |                              |                                  |                                                           |                  |            |
| 1                                            | randomised trials | not serious  | not serious   | not serious  | serious <sup>a</sup> | none <sup>b</sup>    | 21/93 (22.6%)                     | 31/97 (32.0%)                | <b>RR 0.71</b><br>(0.44 to 1.14) | <b>93 fewer per 1,000</b><br>(from 179 fewer to 45 more)  | ⊕⊕⊕⊖<br>MODERATE | CRITICAL   |
| <b>Mortality-Overall</b>                     |                   |              |               |              |                      |                      |                                   |                              |                                  |                                                           |                  |            |
| 2                                            | randomised trials | not serious  | not serious   | not serious  | serious <sup>a</sup> | none <sup>b</sup>    | 39/205 (19.0%)                    | 48/211 (22.7%)               | <b>RR 0.84</b><br>(0.58 to 1.22) | <b>36 fewer per 1,000</b><br>(from 96 fewer to 50 more)   | ⊕⊕⊕⊖<br>MODERATE | CRITICAL   |
| <b>Modified Rankin Score 4-6 at 3 months</b> |                   |              |               |              |                      |                      |                                   |                              |                                  |                                                           |                  |            |
| 1                                            | randomised trials | not serious  | not serious   | not serious  | serious <sup>a</sup> | none <sup>b</sup>    | 52/93 (55.9%)                     | 66/97 (68.0%)                | <b>RR 0.82</b><br>(0.66 to 1.03) | <b>122 fewer per 1,000</b><br>(from 231 fewer to 20 more) | ⊕⊕⊕⊖<br>MODERATE | CRITICAL   |
| <b>Modified Rankin Score 3-6 at 3 months</b> |                   |              |               |              |                      |                      |                                   |                              |                                  |                                                           |                  |            |
| 1                                            | randomised trials | not serious  | not serious   | not serious  | serious <sup>a</sup> | none <sup>b</sup>    | 76/93 (81.7%)                     | 70/97 (72.2%)                | <b>RR 1.13</b><br>(0.97 to 1.32) | <b>94 more per 1,000</b><br>(from 22 fewer to 231 more)   | ⊕⊕⊕⊖<br>MODERATE | CRITICAL   |
| <b>ICH enlargement</b>                       |                   |              |               |              |                      |                      |                                   |                              |                                  |                                                           |                  |            |
| 1                                            | randomised trials | not serious  | not serious   | not serious  | serious <sup>a</sup> | none <sup>b</sup>    | 13/93 (14.0%)                     | 15/97 (15.5%)                | <b>RR 0.90</b><br>(0.46 to 1.80) | <b>15 fewer per 1,000</b><br>(from 84 fewer to 124 more)  | ⊕⊕⊕⊖<br>MODERATE | IMPORTANT  |
| <b>Ischemic Stroke</b>                       |                   |              |               |              |                      |                      |                                   |                              |                                  |                                                           |                  |            |



|   |                   |             |             |             |                           |                   |             |             |                                  |                                                        |                                                                                            |          |
|---|-------------------|-------------|-------------|-------------|---------------------------|-------------------|-------------|-------------|----------------------------------|--------------------------------------------------------|--------------------------------------------------------------------------------------------|----------|
| 1 | randomised trials | not serious | not serious | not serious | very serious <sup>c</sup> | none <sup>b</sup> | 0/93 (0.0%) | 1/97 (1.0%) | <b>RR 0.35</b><br>(0.01 to 8.42) | <b>7 fewer per 1,000</b><br>(from 10 fewer to 76 more) | <br>LOW | CRITICAL |
|---|-------------------|-------------|-------------|-------------|---------------------------|-------------------|-------------|-------------|----------------------------------|--------------------------------------------------------|--------------------------------------------------------------------------------------------|----------|

**MI**

|   |                   |             |             |             |                           |                   |             |             |                                   |                                                         |                                                                                            |           |
|---|-------------------|-------------|-------------|-------------|---------------------------|-------------------|-------------|-------------|-----------------------------------|---------------------------------------------------------|--------------------------------------------------------------------------------------------|-----------|
| 1 | randomised trials | not serious | not serious | not serious | very serious <sup>c</sup> | none <sup>b</sup> | 1/93 (1.1%) | 1/97 (1.0%) | <b>RR 1.04</b><br>(0.07 to 16.43) | <b>0 fewer per 1,000</b><br>(from 10 fewer to 159 more) | <br>LOW | IMPORTANT |
|---|-------------------|-------------|-------------|-------------|---------------------------|-------------------|-------------|-------------|-----------------------------------|---------------------------------------------------------|--------------------------------------------------------------------------------------------|-----------|

**DVT**

|   |                   |             |             |             |                           |                   |             |             |                                  |                                                         |                                                                                            |           |
|---|-------------------|-------------|-------------|-------------|---------------------------|-------------------|-------------|-------------|----------------------------------|---------------------------------------------------------|--------------------------------------------------------------------------------------------|-----------|
| 1 | randomised trials | not serious | not serious | not serious | very serious <sup>c</sup> | none <sup>b</sup> | 0/93 (0.0%) | 2/97 (2.1%) | <b>RR 0.21</b><br>(0.01 to 4.29) | <b>16 fewer per 1,000</b><br>(from 20 fewer to 68 more) | <br>LOW | IMPORTANT |
|---|-------------------|-------------|-------------|-------------|---------------------------|-------------------|-------------|-------------|----------------------------------|---------------------------------------------------------|--------------------------------------------------------------------------------------------|-----------|

**Pulmonary Embolism**

|   |                   |             |             |             |                           |                   |             |             |                                  |                                                        |                                                                                            |           |
|---|-------------------|-------------|-------------|-------------|---------------------------|-------------------|-------------|-------------|----------------------------------|--------------------------------------------------------|--------------------------------------------------------------------------------------------|-----------|
| 1 | randomised trials | not serious | not serious | not serious | very serious <sup>c</sup> | none <sup>b</sup> | 0/93 (0.0%) | 1/97 (1.0%) | <b>RR 0.35</b><br>(0.01 to 8.42) | <b>7 fewer per 1,000</b><br>(from 10 fewer to 76 more) | <br>LOW | IMPORTANT |
|---|-------------------|-------------|-------------|-------------|---------------------------|-------------------|-------------|-------------|----------------------------------|--------------------------------------------------------|--------------------------------------------------------------------------------------------|-----------|

**Post operative Hemorrhage**

|   |                   |             |             |             |                           |                   |                |                |                                  |                                                         |                                                                                            |           |
|---|-------------------|-------------|-------------|-------------|---------------------------|-------------------|----------------|----------------|----------------------------------|---------------------------------------------------------|--------------------------------------------------------------------------------------------|-----------|
| 1 | randomised trials | not serious | not serious | not serious | very serious <sup>c</sup> | none <sup>b</sup> | 17/112 (15.2%) | 15/112 (13.4%) | <b>RR 1.13</b><br>(0.60 to 2.16) | <b>17 more per 1,000</b><br>(from 54 fewer to 155 more) | <br>LOW | IMPORTANT |
|---|-------------------|-------------|-------------|-------------|---------------------------|-------------------|----------------|----------------|----------------------------------|---------------------------------------------------------|--------------------------------------------------------------------------------------------|-----------|

**ADL- Completely dependent**

|   |                   |             |             |             |                           |                   |              |              |                                   |                                                         |                                                                                              |          |
|---|-------------------|-------------|-------------|-------------|---------------------------|-------------------|--------------|--------------|-----------------------------------|---------------------------------------------------------|----------------------------------------------------------------------------------------------|----------|
| 1 | randomised trials | not serious | not serious | not serious | very serious <sup>c</sup> | none <sup>b</sup> | 4/112 (3.6%) | 2/114 (1.8%) | <b>RR 2.04</b><br>(0.38 to 10.89) | <b>18 more per 1,000</b><br>(from 11 fewer to 174 more) | <br>LOW | CRITICAL |
|---|-------------------|-------------|-------------|-------------|---------------------------|-------------------|--------------|--------------|-----------------------------------|---------------------------------------------------------|----------------------------------------------------------------------------------------------|----------|

**CI:** Confidence interval; **RR:** Risk ratio

**Explanations**

- a. Rated down for imprecision by 1 level because of the small number of events and the 95% CI cross the level of significant
- b. Due to the small number of studies publication bias could not be assessed.
- c. Rated down for imprecision by 2 levels given small sample size, very small number of event and the 95% CI crosses the level of significance.

Restrictive platelet transfusion strategy compared to liberal platelet transfusion strategy for thrombocytopenic non-massively bleeding patients

| Certainty assessment         |                       |              |               |                      |                           |                      | N <sub>o</sub> of patients                |                                       | Effect                           |                                                            | Certainty        | Importance |
|------------------------------|-----------------------|--------------|---------------|----------------------|---------------------------|----------------------|-------------------------------------------|---------------------------------------|----------------------------------|------------------------------------------------------------|------------------|------------|
| N <sub>o</sub> of studies    | Study design          | Risk of bias | Inconsistency | Indirectness         | Imprecision               | Other considerations | restrictive platelet transfusion strategy | liberal platelet transfusion strategy | Relative (95% CI)                | Absolute (95% CI)                                          |                  |            |
| <b>Increase in hematoma</b>  |                       |              |               |                      |                           |                      |                                           |                                       |                                  |                                                            |                  |            |
| 1                            | observational studies | serious      | not serious   | serious <sup>a</sup> | very serious <sup>b</sup> | none                 | 7/24 (29.2%)                              | 16/39 (41.0%)                         | <b>RR 0.71</b><br>(0.34 to 1.47) | <b>119 fewer per 1,000</b><br>(from 271 fewer to 193 more) | ⊕○○○<br>VERY LOW | IMPORTANT  |
| <b>No change in hematoma</b> |                       |              |               |                      |                           |                      |                                           |                                       |                                  |                                                            |                  |            |
| 1                            | observational studies | serious      | not serious   | serious <sup>a</sup> | very serious <sup>b</sup> | none                 | 14/18 (77.8%)                             | 13/24 (54.2%)                         | <b>RR 1.44</b><br>(0.92 to 2.24) | <b>238 more per 1,000</b><br>(from 43 fewer to 672 more)   | ⊕○○○<br>VERY LOW | IMPORTANT  |

CI: Confidence interval; RR: Risk ratio

**Explanations**

a. Rated down for indirectness.

b. Rated down for two levels for imprecision do to small number of events, and the 95% confidence interval encompasses 1.

## Restrictive vs. Liberal Platelet Strategy in Non-massively Bleeding Patients On Antiplatelet Therapy

### RCT- Restrictive vs. Liberal Platelet transfusion in patients on antiplatelet therapy

#### Mortality 3 months

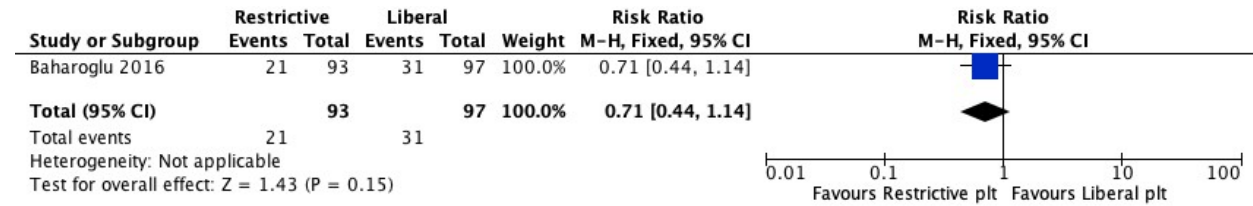

#### Mortality- Overall

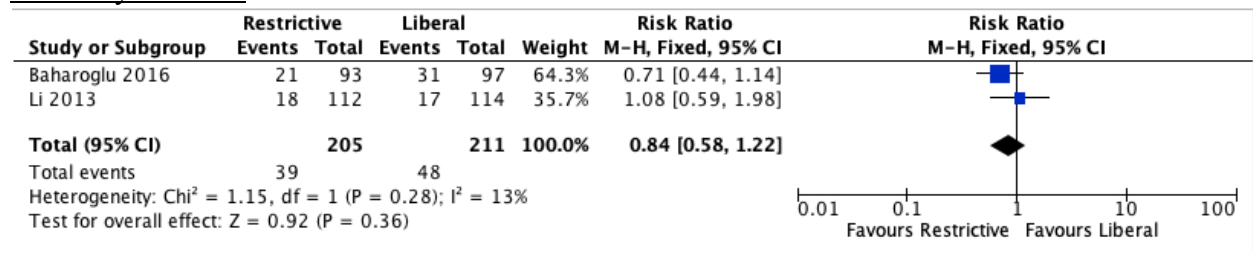

#### Disability- Modified Rankin Score 4-6 at 3 months

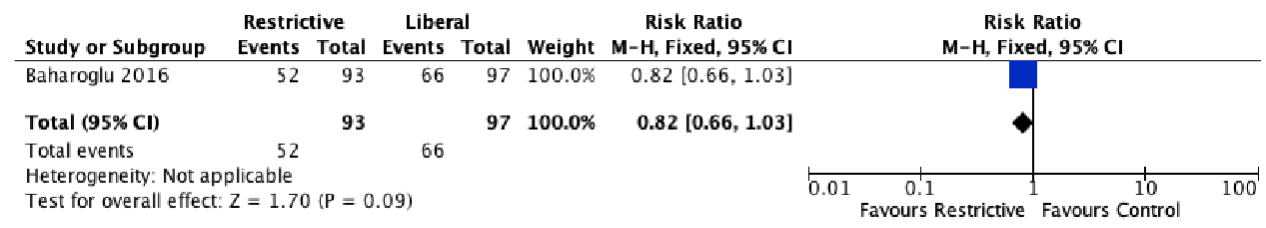

#### Disability- Modified Rankin Score 3-6 at 3 months

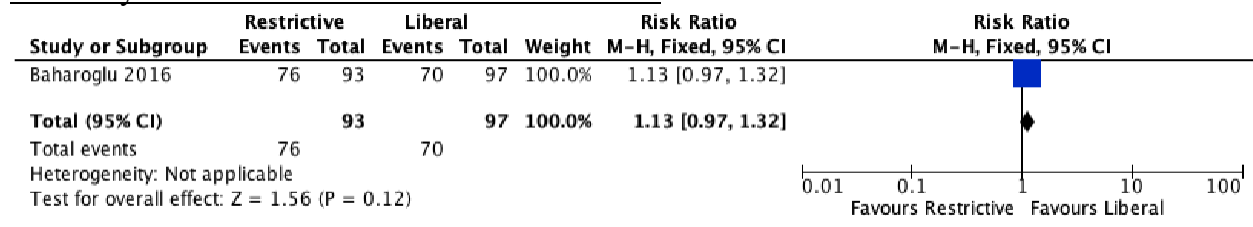

#### Disability- ADL Grade 4- Completely dependent

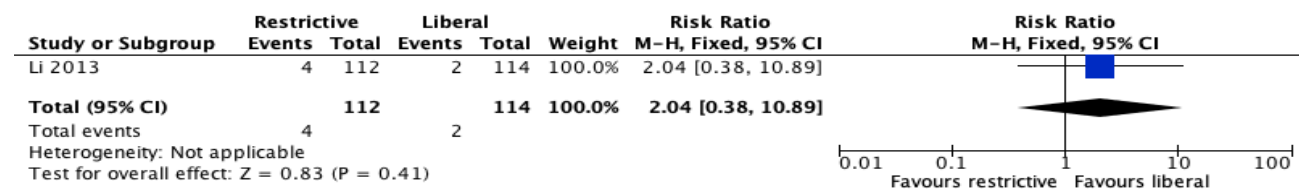

## Postoperative Hemorrhage

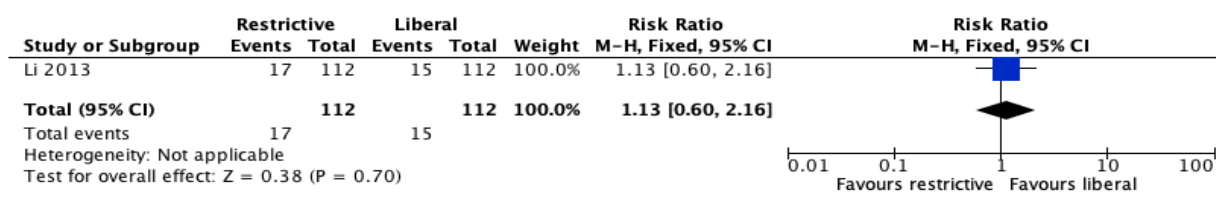

## ICH Enlargement

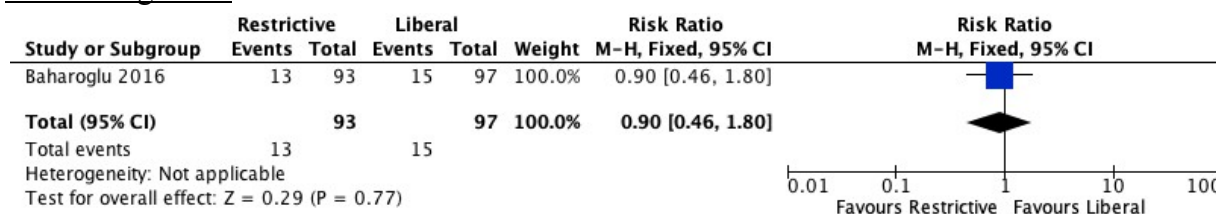

## CVA (Ischemic)

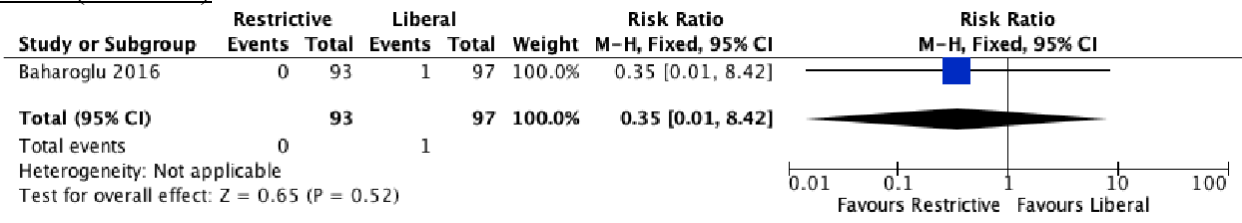

## MI

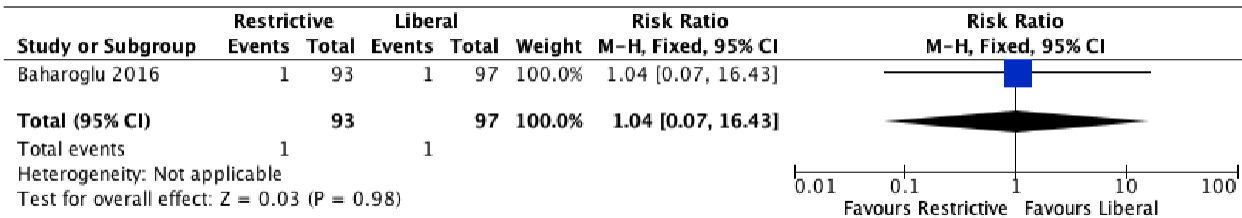

## DVT

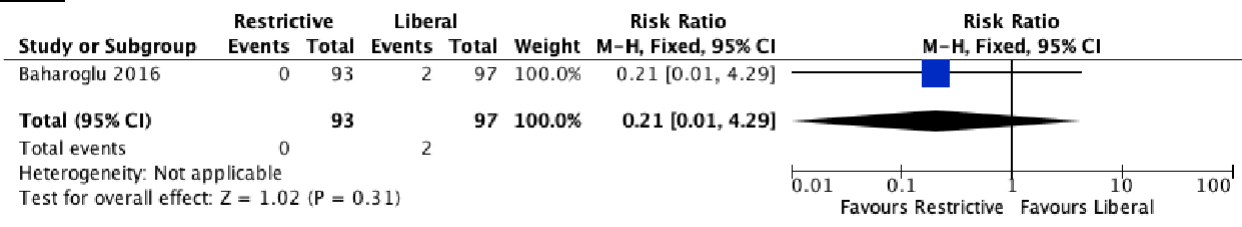

## Observational Studies- Neuro and GI Bleeding

### Neuro

#### Mortality

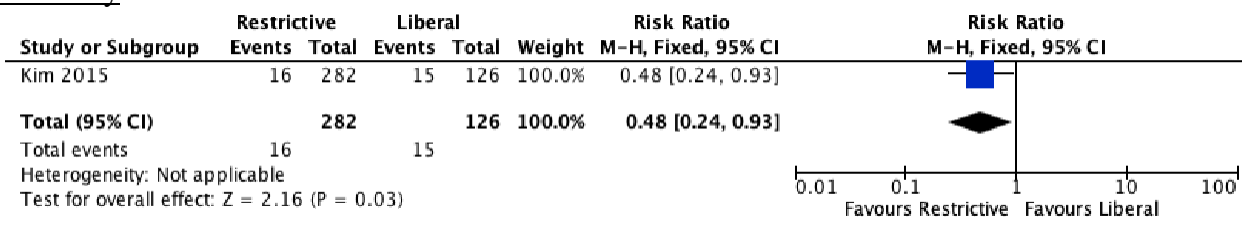

#### Permanent Disability

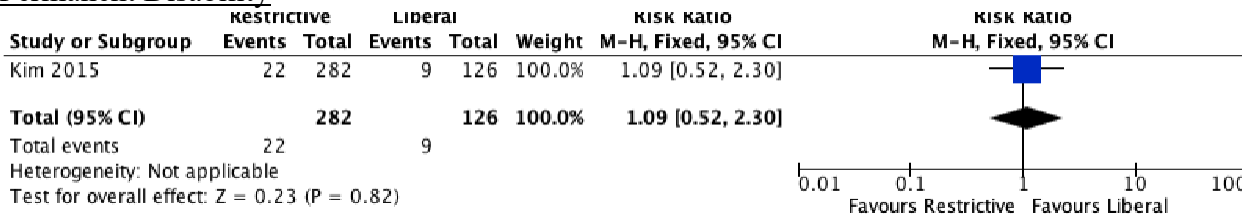

## Temporary Disability

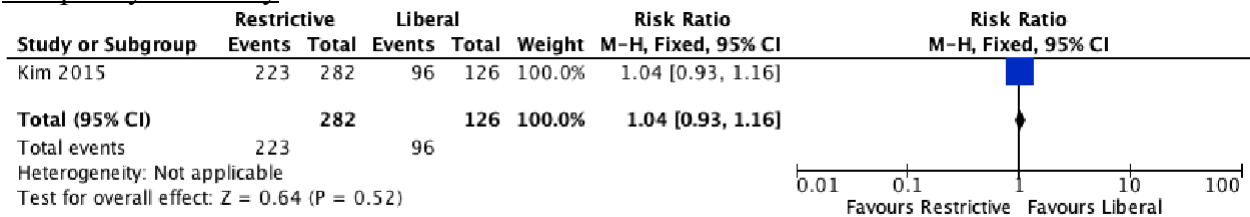

## VTE

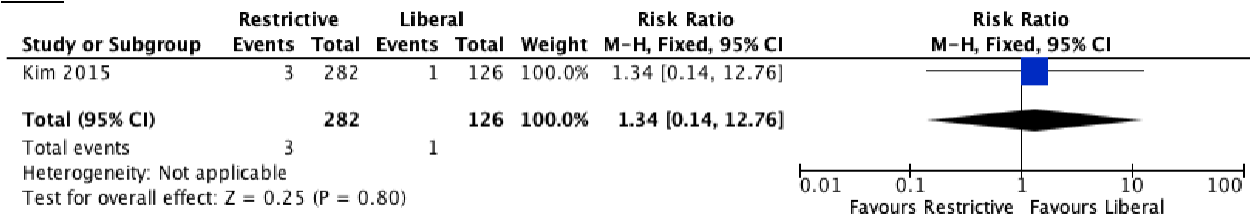

## CVA

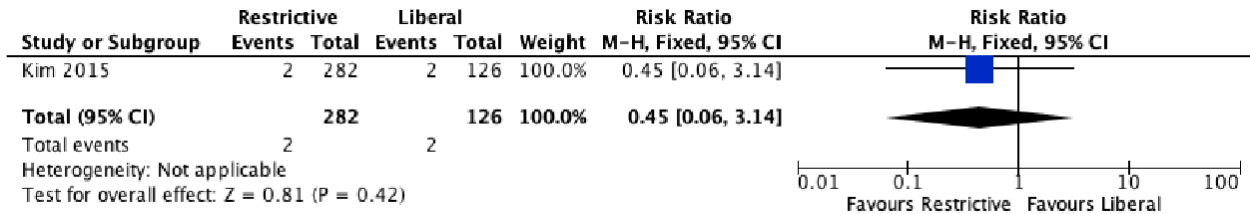

## Increase in ICH

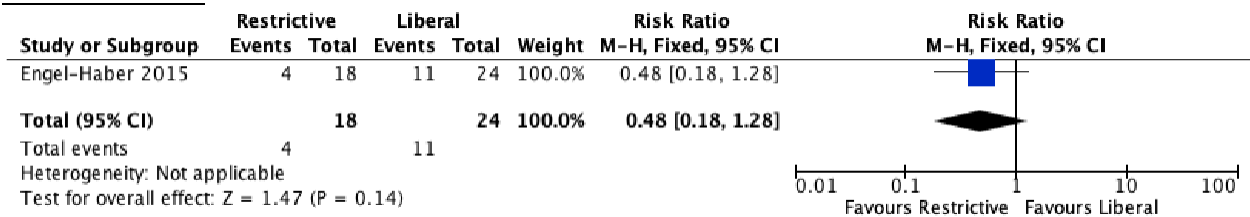

## No Change in ICU

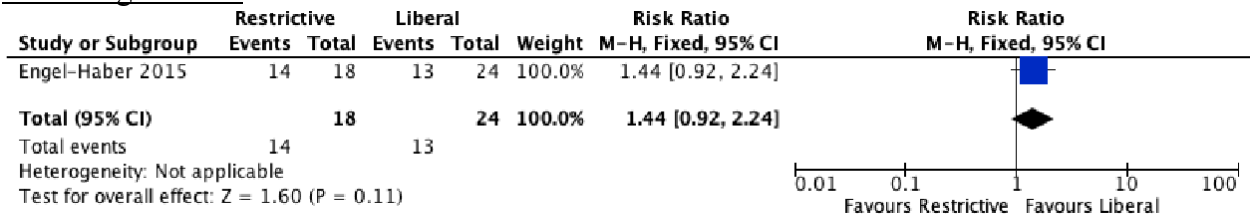

## GI Bleeding

### Mortality

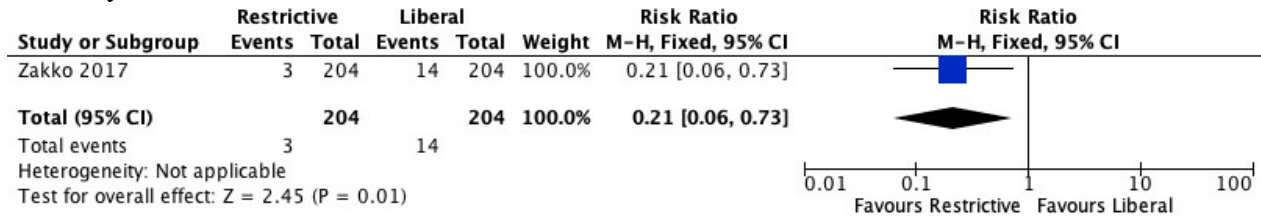

### MI

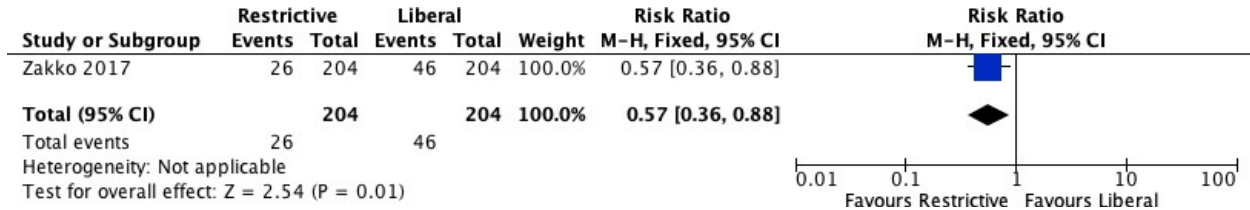

### Major Cardiac Events

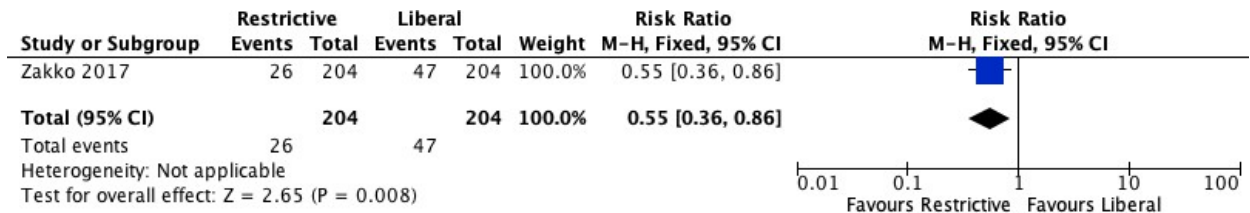

### Recurrent GIB

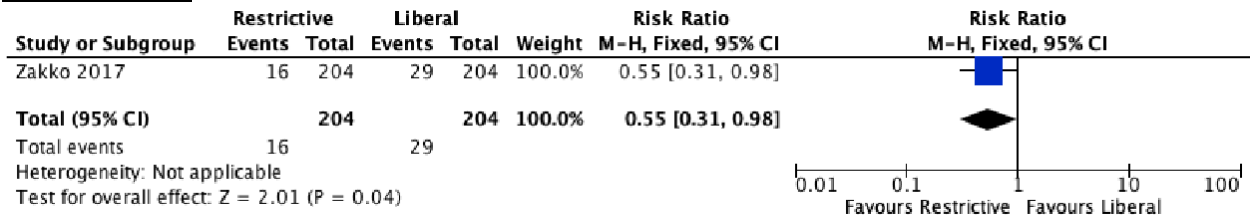

### Hospital LOS > 4 Days

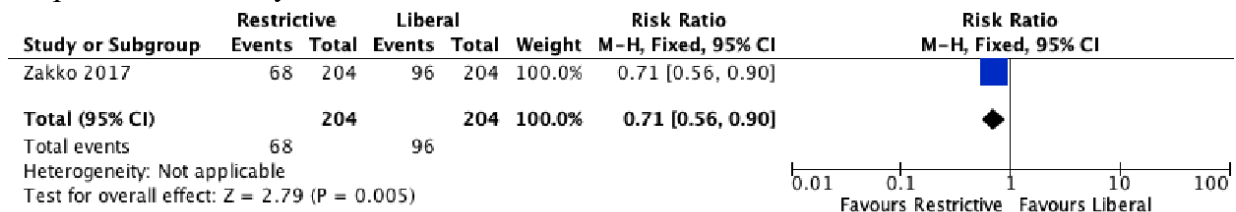

## Restrictive vs. Liberal Platelet Strategy in Non-massively Bleeding Patients

NB: Engel-Haber 2015 did have a cohort not exposed to antiplatelet therapy.

### Increase in hematoma

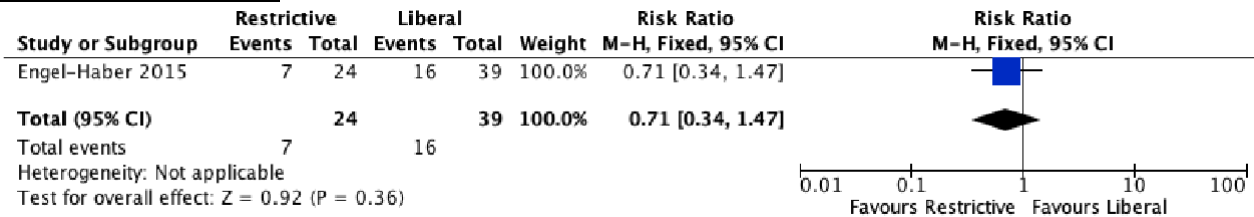

### No change in hematoma

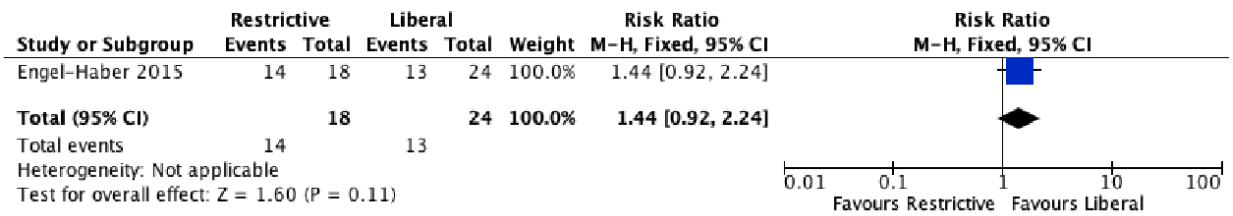



**Evidence Summary 8: Fibrinogen replacement in non-massively bleeding, critically ill adults**

## Fibrinogen in non-massively bleeding critically ill patients

| Certainty assessment                               |              |                      |              |                           |       | № of patients    |               | Effect                            |                                                           | Certainty        | Importance |
|----------------------------------------------------|--------------|----------------------|--------------|---------------------------|-------|------------------|---------------|-----------------------------------|-----------------------------------------------------------|------------------|------------|
| № of studies                                       | Risk of bias | Inconsistency        | Indirectness | Imprecision               | Other | Early fibrinogen | Control       | Relative (95% CI)                 | Absolute (95% CI)                                         |                  |            |
| <b>Mortality - Cardiac surgery</b>                 |              |                      |              |                           |       |                  |               |                                   |                                                           |                  |            |
| 5 RCT                                              | not serious  | not serious          | not serious  | very serious <sup>a</sup> | none  | 5/235 (2.1%)     | 12/234 (5.1%) | <b>RR 0.44</b><br>(0.17 to 1.19)  | <b>29 fewer per 1,000</b><br>(from 43 fewer to 10 more)   | ⊕⊕○○<br>LOW      | CRITICAL   |
| <b>Mortality - Vascular surgery</b>                |              |                      |              |                           |       |                  |               |                                   |                                                           |                  |            |
| 1 RCT                                              | not serious  | not serious          | not serious  | very serious <sup>a</sup> | none  | 0/10 (0.0%)      | 1/10 (10.0%)  | <b>RR 0.33</b><br>(0.02 to 7.32)  | <b>67 fewer per 1,000</b><br>(from 98 fewer to 632 more)  | ⊕⊕○○<br>LOW      | CRITICAL   |
| <b>Stroke - Cardiac surgery</b>                    |              |                      |              |                           |       |                  |               |                                   |                                                           |                  |            |
| 3 RCT                                              | not serious  | serious <sup>b</sup> | not serious  | very serious <sup>a</sup> | none  | 6/196 (3.1%)     | 5/192 (2.6%)  | <b>RR 1.16</b><br>(0.36 to 3.72)  | <b>4 more per 1,000</b><br>(from 17 fewer to 71 more)     | ⊕○○○<br>VERY LOW | CRITICAL   |
| <b>Stroke - Vascular surgery</b>                   |              |                      |              |                           |       |                  |               |                                   |                                                           |                  |            |
| 1 RCT                                              | not serious  | not serious          | not serious  | very serious <sup>a</sup> | none  | 0/10 (0.0%)      | 0/10 (0.0%)   | not pooled                        | see comment                                               | -                | CRITICAL   |
| <b>Myocardial infarction - Cardiac surgery</b>     |              |                      |              |                           |       |                  |               |                                   |                                                           |                  |            |
| 3 RCT                                              | not serious  | not serious          | not serious  | very serious <sup>a</sup> | none  | 3/128 (2.3%)     | 2/128 (1.6%)  | <b>RR 1.40</b><br>(0.29 to 6.87)  | <b>6 more per 1,000</b><br>(from 11 fewer to 92 more)     | ⊕⊕○○<br>LOW      | CRITICAL   |
| <b>Myocardial infarction - Non-cardiac surgery</b> |              |                      |              |                           |       |                  |               |                                   |                                                           |                  |            |
| 1 RCT                                              | not serious  | not serious          | not serious  | very serious <sup>a</sup> | none  | 1/10 (10.0%)     | 1/10 (10.0%)  | <b>RR 1.00</b><br>(0.07 to 13.87) | <b>0 fewer per 1,000</b><br>(from 93 fewer to 1,000 more) | ⊕⊕○○<br>LOW      | CRITICAL   |
| <b>Acute kidney injury - Cardiac surgery</b>       |              |                      |              |                           |       |                  |               |                                   |                                                           |                  |            |

## Fibrinogen in non-massively bleeding critically ill patients

|                                                  |             |                          |             |                           |      |                   |                   |                                   |                                                          |                  |           |
|--------------------------------------------------|-------------|--------------------------|-------------|---------------------------|------|-------------------|-------------------|-----------------------------------|----------------------------------------------------------|------------------|-----------|
| 3 RCT                                            | not serious | not serious              | not serious | very serious <sup>a</sup> | none | 11/196<br>(5.6%)  | 14/192<br>(7.3%)  | <b>RR 0.77</b><br>(0.36 to 1.65)  | <b>17 fewer per 1,000</b><br>(from 47 fewer to 47 more)  | ⊕⊕○○<br>LOW      | CRITICAL  |
| <b>Acute kidney injury - Non-cardiac surgery</b> |             |                          |             |                           |      |                   |                   |                                   |                                                          |                  |           |
| 1 RCT                                            | not serious | not serious              | not serious | very serious <sup>a</sup> | none | 0/10<br>(0.0%)    | 1/10<br>(10.0%)   | <b>RR 0.33</b><br>(0.02 to 7.32)  | <b>67 fewer per 1,000</b><br>(from 98 fewer to 632 more) | ⊕⊕○○<br>LOW      | CRITICAL  |
| <b>Venous thrombosis - Cardiac surgery</b>       |             |                          |             |                           |      |                   |                   |                                   |                                                          |                  |           |
| 4 RCT                                            | not serious | not serious              | not serious | very serious <sup>a</sup> | none | 1/206<br>(0.5%)   | 0/202<br>(0.0%)   | <b>RR 2.85</b><br>(0.12 to 68.83) | <b>0 fewer per 1,000</b><br>(from 0 fewer to 0 fewer)    | ⊕⊕○○<br>LOW      | IMPORTANT |
| <b>Venous thrombosis - Non-cardiac surgery</b>   |             |                          |             |                           |      |                   |                   |                                   |                                                          |                  |           |
| 1 RCT                                            | not serious | not serious              | not serious | very serious <sup>a</sup> | none | 0/10<br>(0.0%)    | 1/10<br>(10.0%)   | <b>RR 0.33</b><br>(0.02 to 7.32)  | <b>67 fewer per 1,000</b><br>(from 98 fewer to 632 more) | ⊕⊕○○<br>LOW      | IMPORTANT |
| <b>Infection - Cardiac surgery</b>               |             |                          |             |                           |      |                   |                   |                                   |                                                          |                  |           |
| 3 RCT                                            | not serious | not serious              | not serious | very serious <sup>a</sup> | none | 23/196<br>(11.7%) | 23/192<br>(12.0%) | <b>RR 0.97</b><br>(0.57 to 1.67)  | <b>4 fewer per 1,000</b><br>(from 52 fewer to 80 more)   | ⊕⊕○○<br>LOW      | IMPORTANT |
| <b>Infection - Non-cardiac surgery</b>           |             |                          |             |                           |      |                   |                   |                                   |                                                          |                  |           |
| 1 RCT                                            | not serious | not serious              | not serious | very serious <sup>a</sup> | none | 3/22<br>(13.6%)   | 3/21<br>(14.3%)   | <b>RR 0.95</b><br>(0.22 to 4.21)  | <b>7 fewer per 1,000</b><br>(from 111 fewer to 459 more) | ⊕⊕○○<br>LOW      | IMPORTANT |
| <b>Blood loss - Cardiac surgery</b>              |             |                          |             |                           |      |                   |                   |                                   |                                                          |                  |           |
| 3 RCT                                            | not serious | not serious <sup>c</sup> | not serious | serious <sup>d</sup>      | none | 176               | 172               | -                                 | <b>MD 87.76 lower</b><br>(149.49 lower to 26.03 lower)   | ⊕⊕⊕○<br>MODERATE | IMPORTANT |
| <b>Reoperation - Cardiac surgery</b>             |             |                          |             |                           |      |                   |                   |                                   |                                                          |                  |           |

## Fibrinogen in non-massively bleeding critically ill patients

|                                                         |             |                      |             |                           |      |                   |                   |                                  |                                                            |                  |           |
|---------------------------------------------------------|-------------|----------------------|-------------|---------------------------|------|-------------------|-------------------|----------------------------------|------------------------------------------------------------|------------------|-----------|
| 4 RCT                                                   | not serious | not serious          | not serious | very serious <sup>a</sup> | none | 20/168<br>(11.9%) | 23/168<br>(13.7%) | <b>RR 0.87</b><br>(0.54 to 1.42) | <b>18 fewer per 1,000</b><br>(from 63 fewer to 57 more)    | ⊕⊕○○<br>LOW      | IMPORTANT |
| <b>ICU length of stay - Non-cardiac surgery</b>         |             |                      |             |                           |      |                   |                   |                                  |                                                            |                  |           |
| 1 RCT                                                   | not serious | not serious          | not serious | very serious <sup>e</sup> | none | 19                | 10                | -                                | <b>MD 0</b><br>(2.93 lower to 2.93 higher)                 | ⊕⊕○○<br>LOW      | IMPORTANT |
| <b>Hospital length of stay - Non-cardiac surgery</b>    |             |                      |             |                           |      |                   |                   |                                  |                                                            |                  |           |
| 1 RCT                                                   | not serious | not serious          | not serious | very serious <sup>e</sup> | none | 10                | 10                | -                                | <b>MD 1.5 lower</b><br>(9.96 lower to 6.96 higher)         | ⊕⊕○○<br>LOW      | IMPORTANT |
| <b>Proportion receiving RBCs - Cardiac surgery</b>      |             |                      |             |                           |      |                   |                   |                                  |                                                            |                  |           |
| 3 RCT                                                   | not serious | serious <sup>b</sup> | not serious | serious <sup>d</sup>      | none | 38/128<br>(29.7%) | 61/128<br>(47.7%) | <b>RR 0.62</b><br>(0.46 to 0.84) | <b>181 fewer per 1,000</b><br>(from 257 fewer to 76 fewer) | ⊕⊕○○<br>LOW      | IMPORTANT |
| <b>Proportion receiving plasma - Cardiac surgery</b>    |             |                      |             |                           |      |                   |                   |                                  |                                                            |                  |           |
| 2 RCT                                                   | not serious | serious <sup>b</sup> | not serious | serious <sup>d</sup>      | none | 9/118<br>(7.6%)   | 21/118<br>(17.8%) | <b>RR 0.44</b><br>(0.22 to 0.90) | <b>100 fewer per 1,000</b><br>(from 139 fewer to 18 fewer) | ⊕⊕○○<br>LOW      | IMPORTANT |
| <b>Proportion receiving platelets - Cardiac surgery</b> |             |                      |             |                           |      |                   |                   |                                  |                                                            |                  |           |
| 3 RCT                                                   | not serious | not serious          | not serious | serious <sup>d</sup>      | none | 13/128<br>(10.2%) | 27/128<br>(21.1%) | <b>RR 0.50</b><br>(0.29 to 0.86) | <b>105 fewer per 1,000</b><br>(from 150 fewer to 30 fewer) | ⊕⊕⊕○<br>MODERATE | IMPORTANT |
| <b>Mean RBCs transfused - Cardiac surgery</b>           |             |                      |             |                           |      |                   |                   |                                  |                                                            |                  |           |
| 3 RCT                                                   | not serious | serious <sup>b</sup> | not serious | serious <sup>e</sup>      | none | 176               | 172               | -                                | <b>MD 0.37 lower</b><br>(1.6 lower to 0.86 higher)         | ⊕⊕○○<br>LOW      | IMPORTANT |
| <b>Mean RBCs transfused - Non-cardiac surgery</b>       |             |                      |             |                           |      |                   |                   |                                  |                                                            |                  |           |

## Fibrinogen in non-massively bleeding critically ill patients

|                                                    |             |                      |             |                           |      |     |     |   |                                                     |             |           |
|----------------------------------------------------|-------------|----------------------|-------------|---------------------------|------|-----|-----|---|-----------------------------------------------------|-------------|-----------|
| 1 RCT                                              | not serious | not serious          | not serious | very serious <sup>a</sup> | none | 10  | 10  | - | MD <b>1.5 lower</b><br>(3.15 lower to 0.15 higher)  | ⊕⊕○○<br>LOW | IMPORTANT |
| <b>Mean plasma transfused - Cardiac surgery</b>    |             |                      |             |                           |      |     |     |   |                                                     |             |           |
| 2 RCT                                              | not serious | serious <sup>b</sup> | not serious | serious <sup>e</sup>      | none | 118 | 114 | - | MD <b>0.42 lower</b><br>(0.99 lower to 0.14 higher) | ⊕⊕○○<br>LOW | IMPORTANT |
| <b>Mean platelets transfused - Cardiac surgery</b> |             |                      |             |                           |      |     |     |   |                                                     |             |           |
| 2 RCT                                              | not serious | not serious          | not serious | very serious <sup>e</sup> | none | 118 | 114 | - | MD <b>0.01 lower</b><br>(0.31 lower to 0.29 higher) | ⊕⊕○○<br>LOW | IMPORTANT |

CI: Confidence interval; RR: Risk ratio; MD: Mean difference

### Explanations

- Few events with very wide confidence intervals which do not exclude significant benefit or harm.
- Significant heterogeneity with point estimates on both sides of the line of no effect.
- Statistical heterogeneity, but of little clinical significance as all point estimates and confidence intervals favour fibrinogen.
- Though statistically significant, but optimal information size is not met, resulting in likely imprecision.
- Small number of patients with very wide confidence intervals resulting in very significant imprecision.

# Fibrinogen in non-massively bleeding critically ill patients

## 1. Mortality

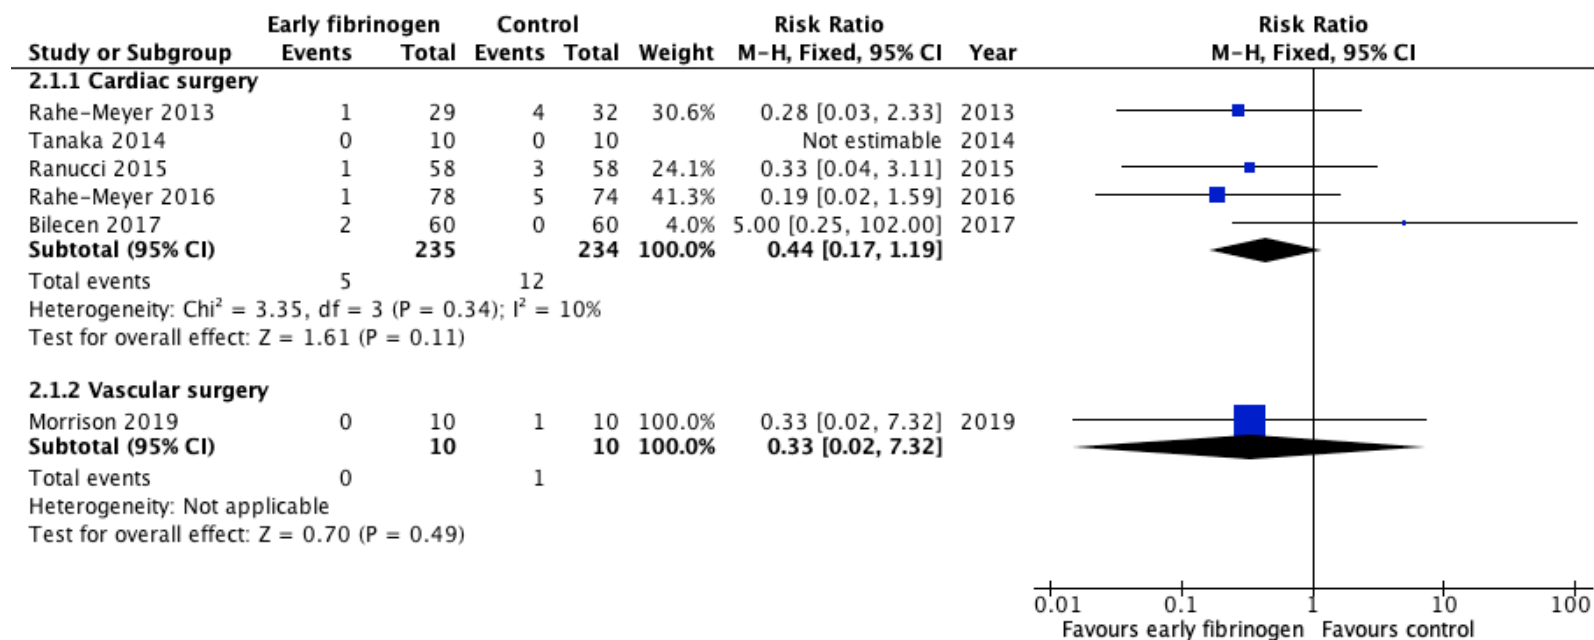

## 2. Stroke

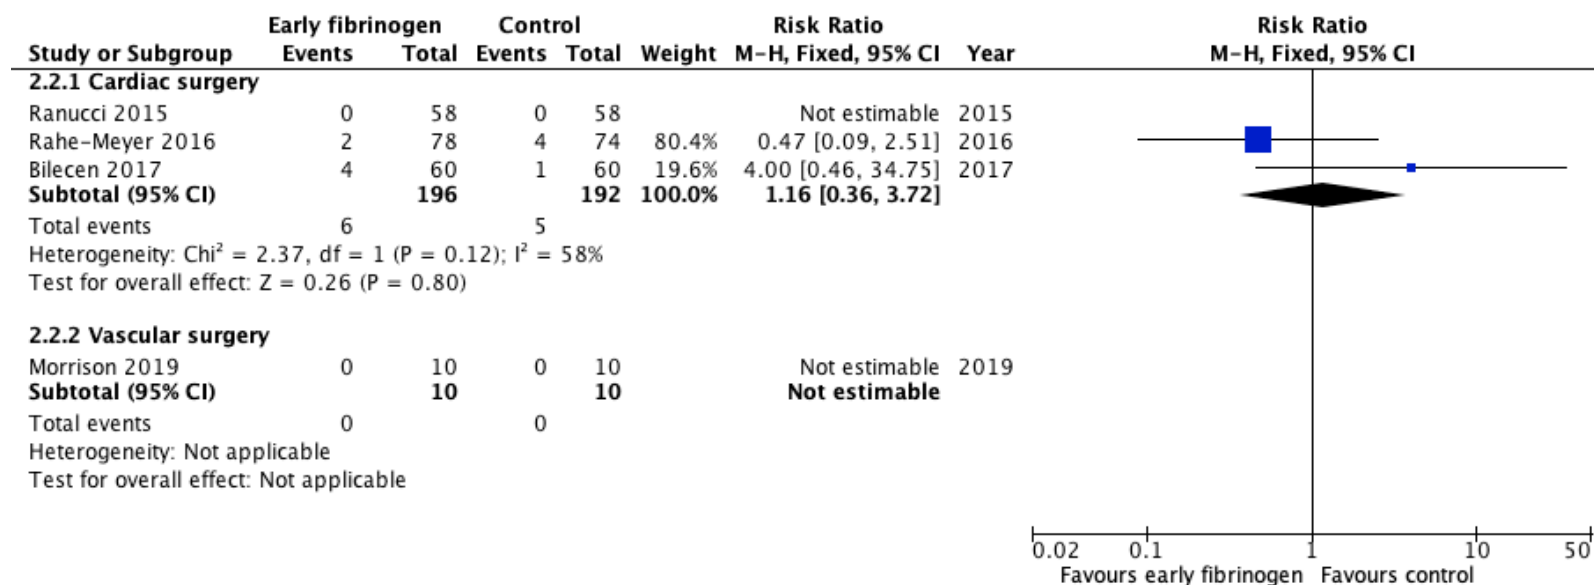

# Fibrinogen in non-massively bleeding critically ill patients

## 3. Myocardial infarction

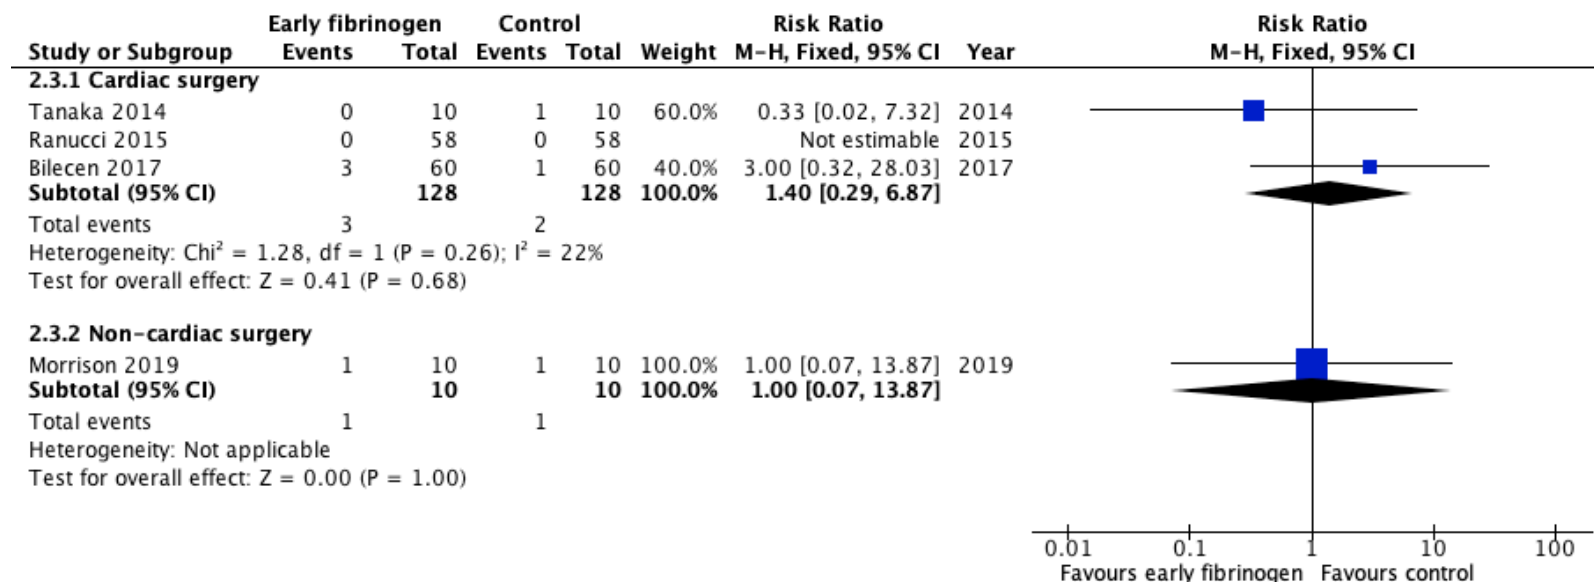

## 4. Venous thrombosis

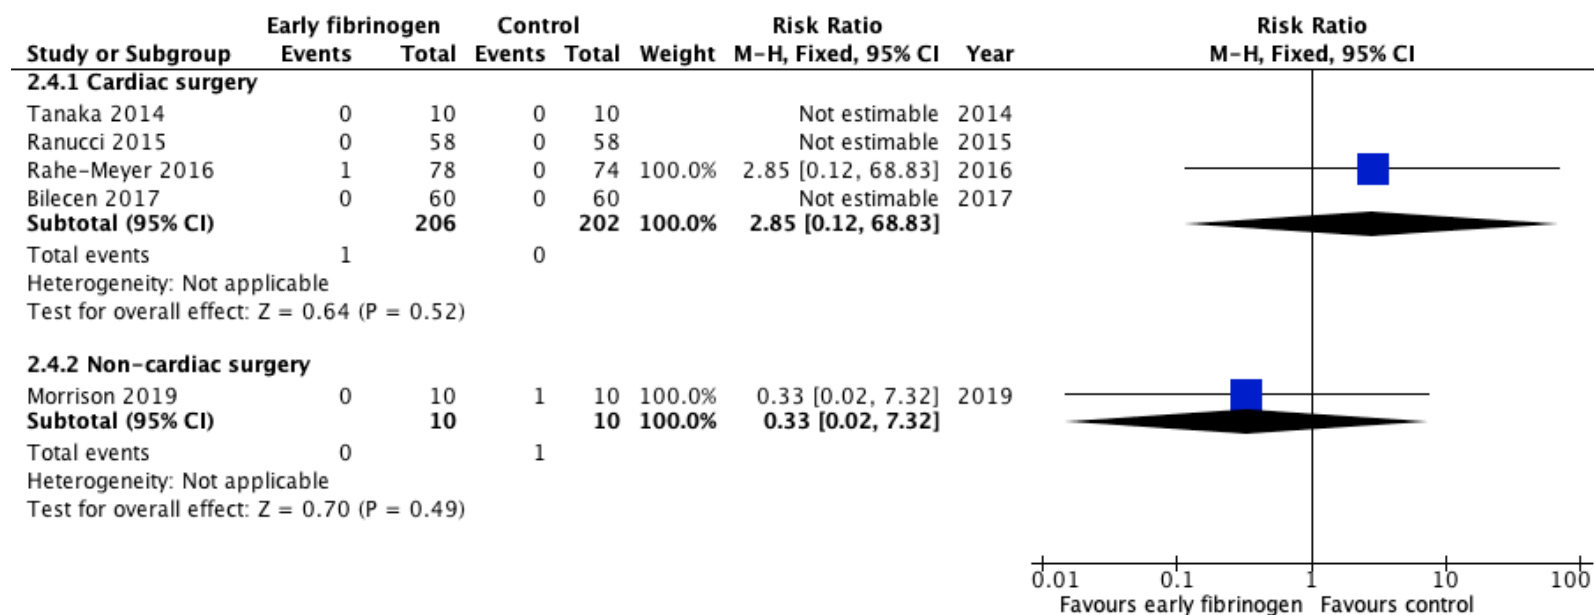

## Fibrinogen in non-massively bleeding critically ill patients

### 5. Acute Kidney Injury

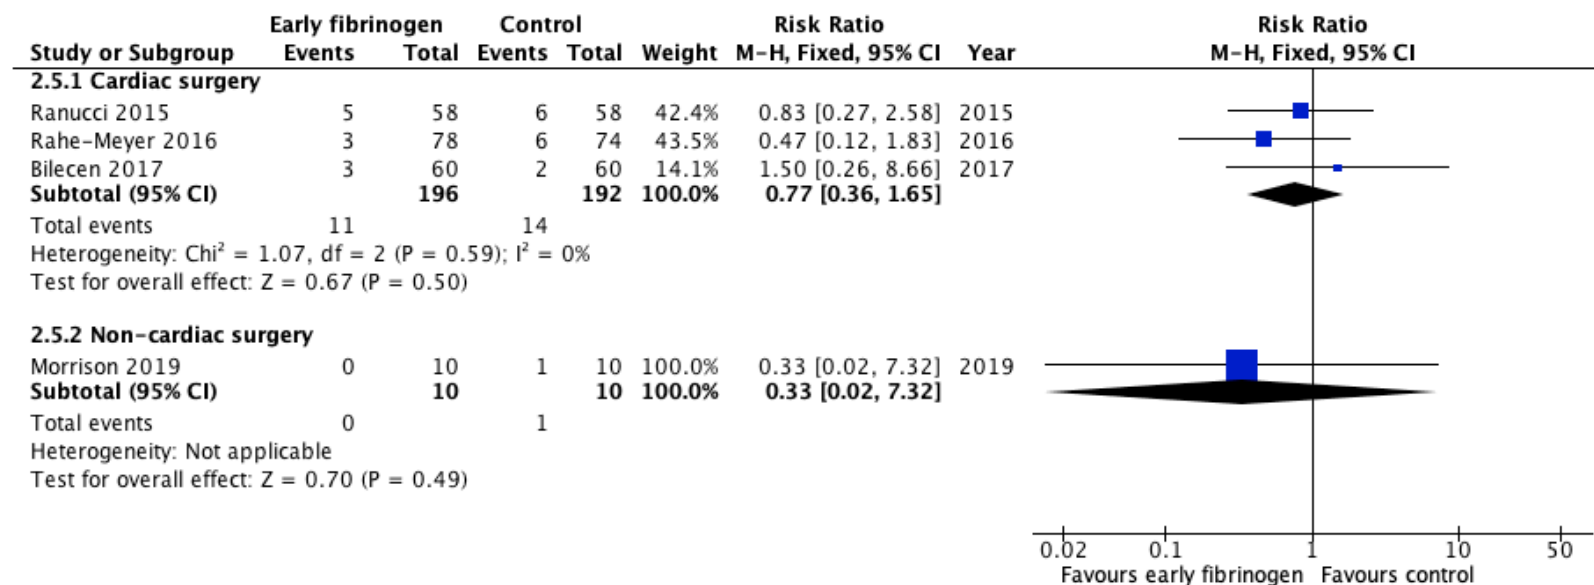

### 6. Infections/sepsis

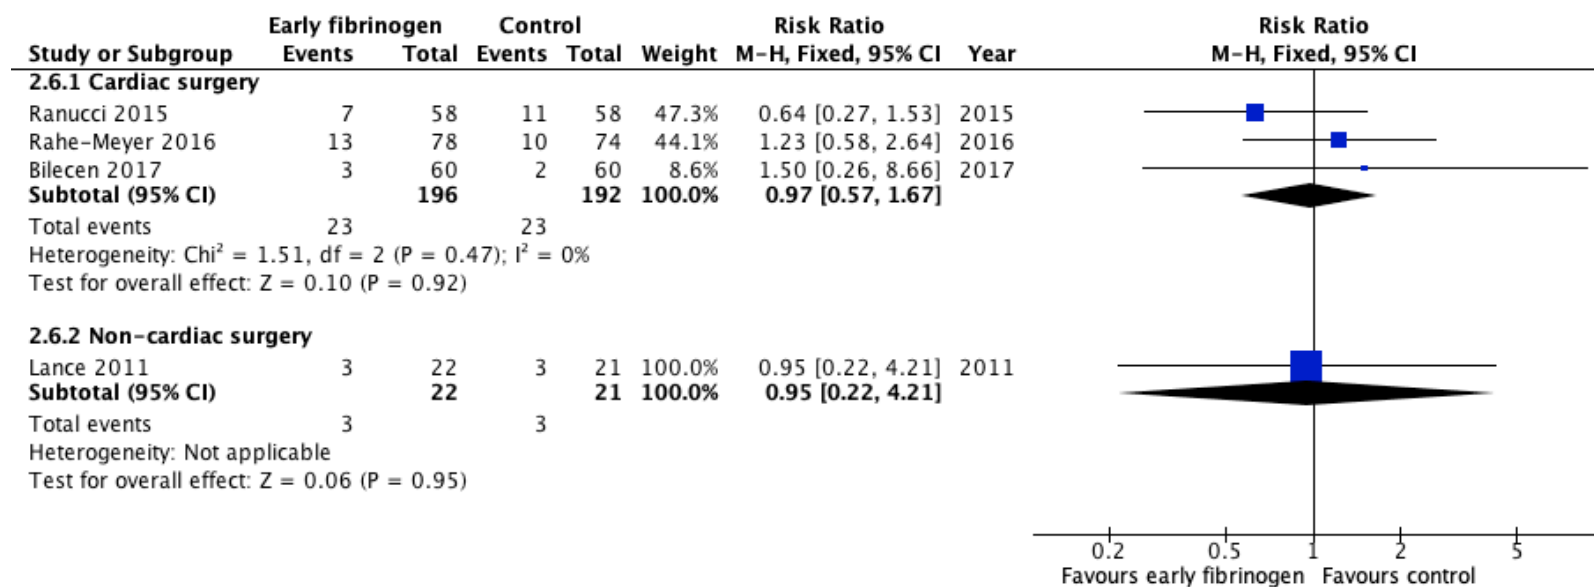



## Fibrinogen in non-massively bleeding critically ill patients

### 7. Blood loss

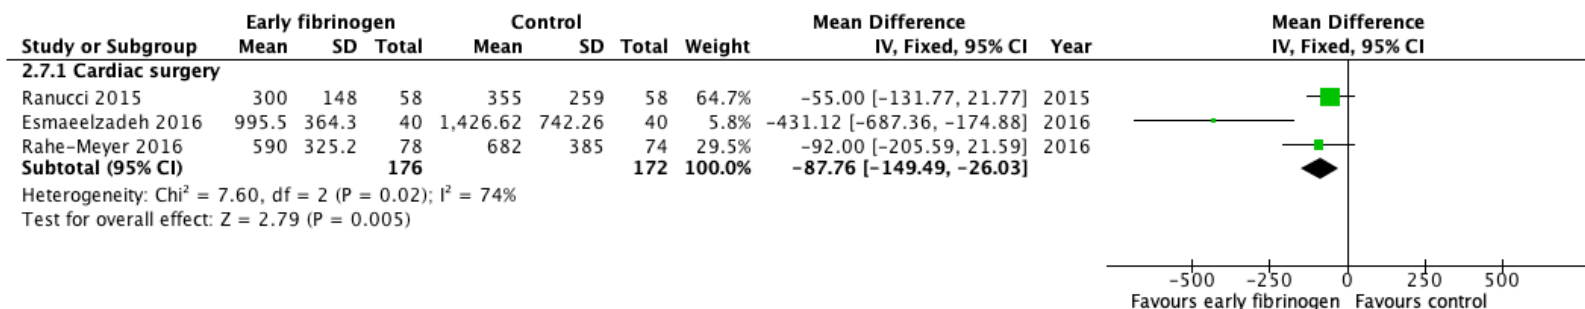

### 8. Reoperation

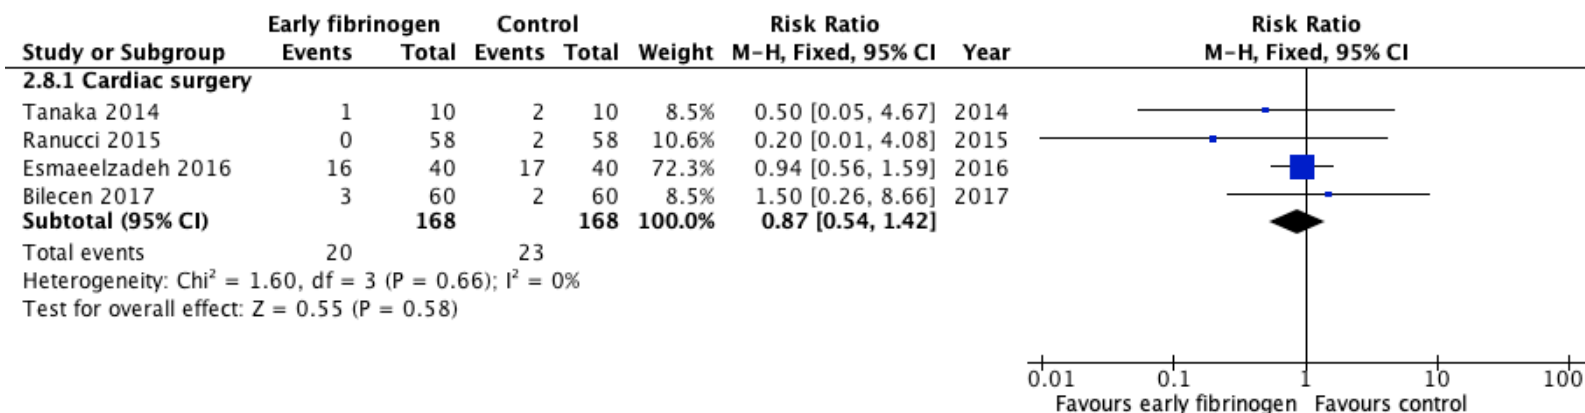

### 9. ICU length of stay

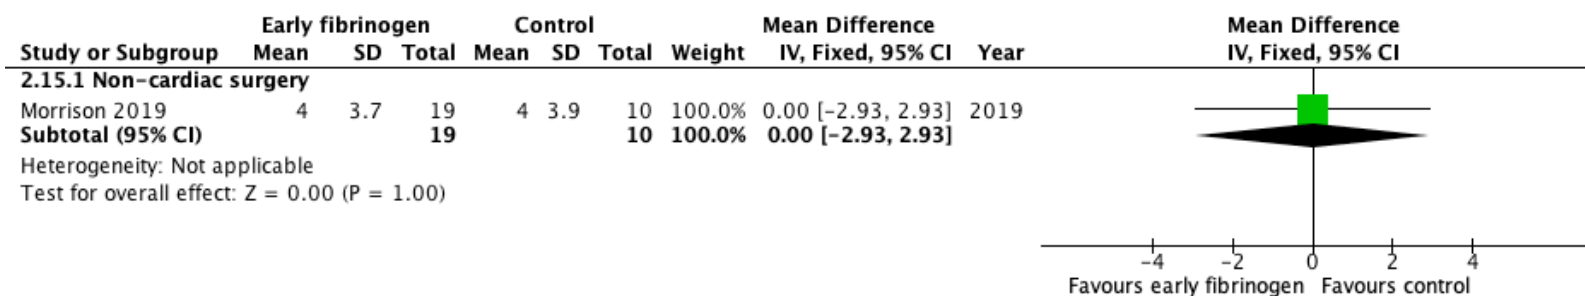

## Fibrinogen in non-massively bleeding critically ill patients

### 10. Hospital length of stay

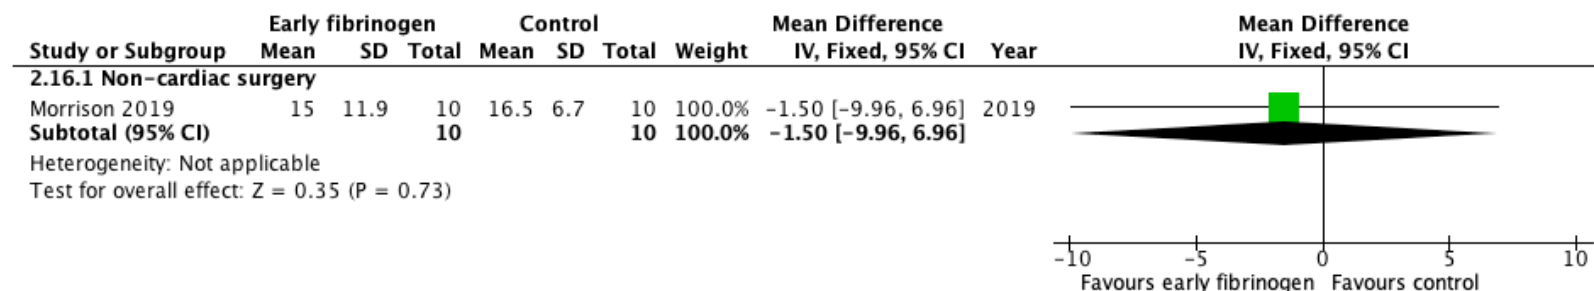

### 11. Proportion receiving RBCs

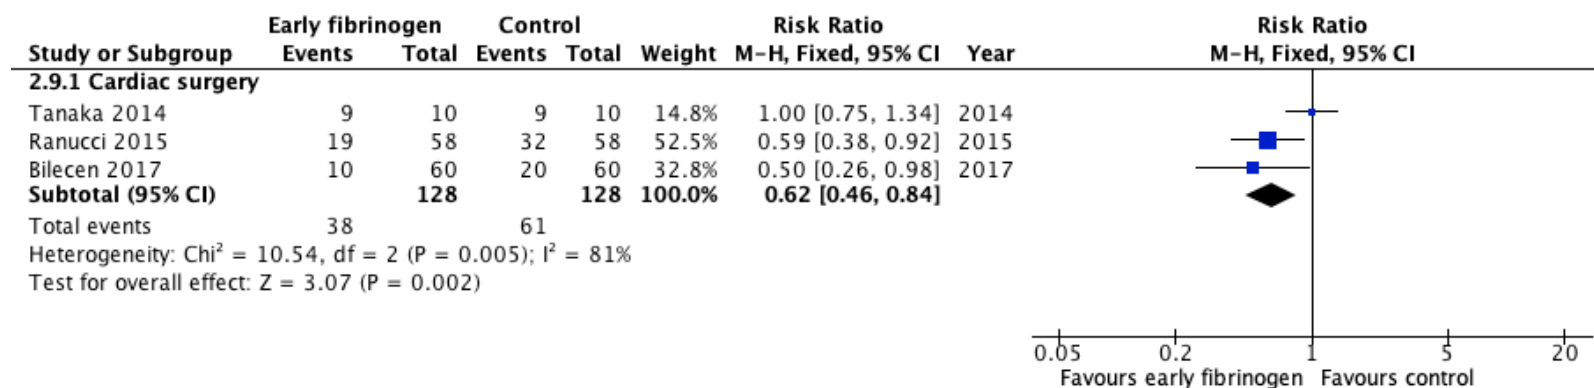

### 12. Proportion receiving plasma

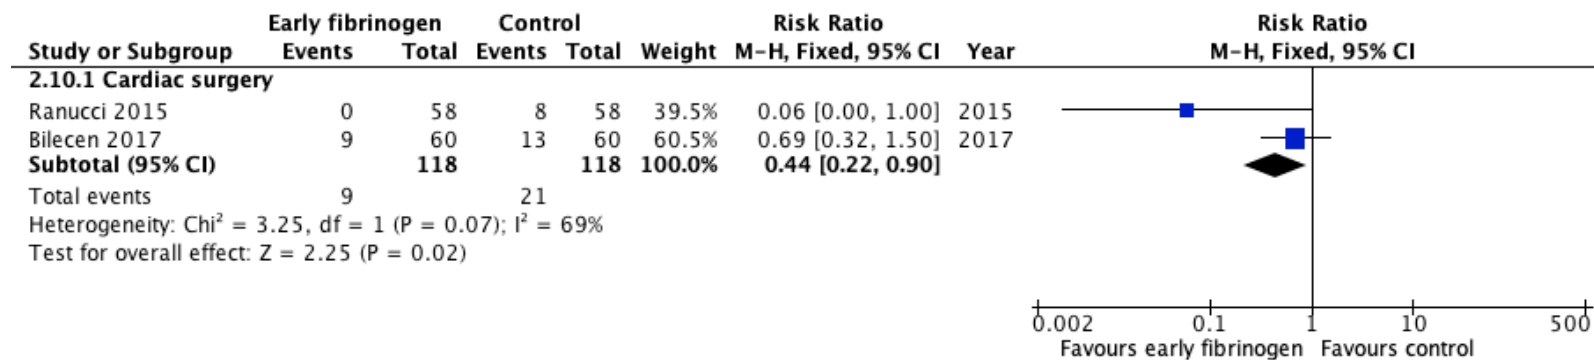

## Fibrinogen in non-massively bleeding critically ill patients

### 13. Proportion receiving platelets

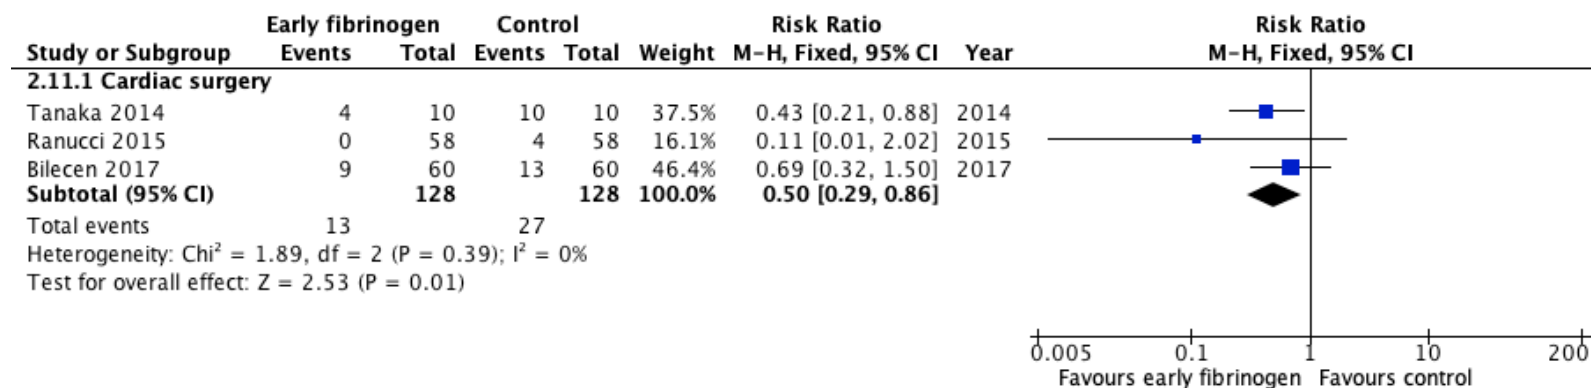

### 14. Mean RBCs transfused

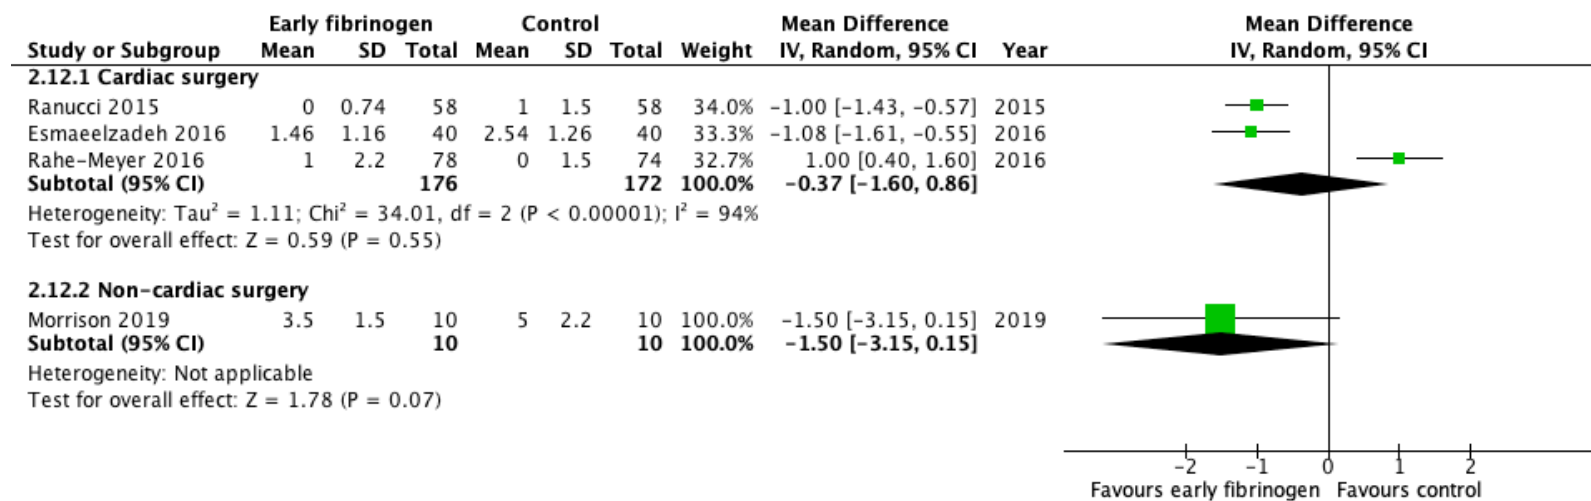

## Fibrinogen in non-massively bleeding critically ill patients

### 15. Mean plasma transfused

| Study or Subgroup             | Early fibrinogen |      |            | Control |      |            | Weight        | Mean Difference<br>IV, Fixed, 95% CI | Year |
|-------------------------------|------------------|------|------------|---------|------|------------|---------------|--------------------------------------|------|
|                               | Mean             | SD   | Total      | Mean    | SD   | Total      |               |                                      |      |
| <b>2.13.1 Cardiac surgery</b> |                  |      |            |         |      |            |               |                                      |      |
| Esmaelzadeh 2016              | 1.34             | 1.54 | 40         | 3.05    | 1.39 | 40         | 77.5%         | -1.71 [-2.35, -1.07]                 | 2016 |
| Rahe-Meyer 2016               | 4                | 4.4  | 78         | 0       | 3    | 74         | 22.5%         | 4.00 [2.81, 5.19]                    | 2016 |
| <b>Subtotal (95% CI)</b>      |                  |      | <b>118</b> |         |      | <b>114</b> | <b>100.0%</b> | <b>-0.42 [-0.99, 0.14]</b>           |      |

Heterogeneity:  $\text{Chi}^2 = 68.29$ ,  $\text{df} = 1$  ( $P < 0.00001$ );  $I^2 = 99\%$   
 Test for overall effect:  $Z = 1.47$  ( $P = 0.14$ )

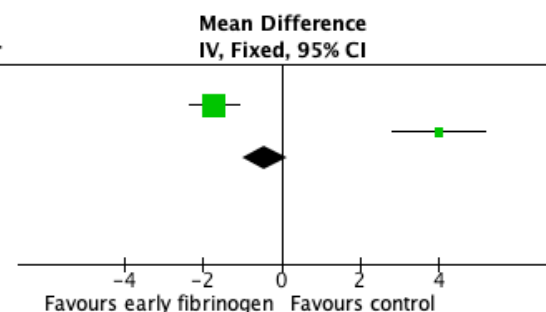

### 16. Mean platelets transfused

| Study or Subgroup             | Early fibrinogen |      |            | Control |      |            | Weight        | Mean Difference<br>IV, Fixed, 95% CI | Year |
|-------------------------------|------------------|------|------------|---------|------|------------|---------------|--------------------------------------|------|
|                               | Mean             | SD   | Total      | Mean    | SD   | Total      |               |                                      |      |
| <b>2.14.1 Cardiac surgery</b> |                  |      |            |         |      |            |               |                                      |      |
| Esmaelzadeh 2016              | 0.35             | 1.16 | 40         | 0.37    | 1.1  | 40         | 36.2%         | -0.02 [-0.52, 0.48]                  | 2016 |
| Rahe-Meyer 2016               | 1                | 1.5  | 78         | 1       | 0.74 | 74         | 63.8%         | 0.00 [-0.37, 0.37]                   | 2016 |
| <b>Subtotal (95% CI)</b>      |                  |      | <b>118</b> |         |      | <b>114</b> | <b>100.0%</b> | <b>-0.01 [-0.31, 0.29]</b>           |      |

Heterogeneity:  $\text{Chi}^2 = 0.00$ ,  $\text{df} = 1$  ( $P = 0.95$ );  $I^2 = 0\%$   
 Test for overall effect:  $Z = 0.05$  ( $P = 0.96$ )

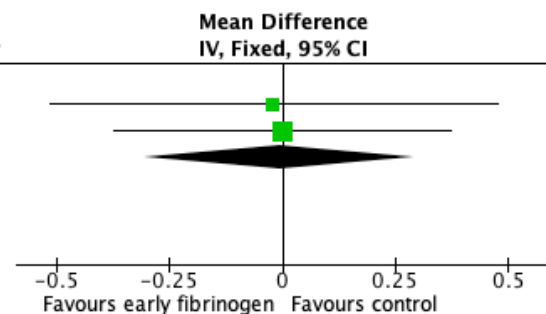

**Evidence Summary 9: Plasma transfusion in non-massively bleeding, critically ill adults**

## Restrictive plasma transfusion strategy compared to liberal plasma transfusion strategy for non-massively bleeding patients

| Certainty assessment                     |                       |                          |               |              |                           |                      | N <sub>o</sub> of patients              |                                     | Effect                        |                                                          | Certainty        | Importance |
|------------------------------------------|-----------------------|--------------------------|---------------|--------------|---------------------------|----------------------|-----------------------------------------|-------------------------------------|-------------------------------|----------------------------------------------------------|------------------|------------|
| N <sub>o</sub> of studies                | Study design          | Risk of bias             | Inconsistency | Indirectness | Imprecision               | Other considerations | restrictive plasma transfusion strategy | liberal plasma transfusion strategy | Relative (95% CI)             | Absolute (95% CI)                                        |                  |            |
| <b>RCT Mortality- 30 Day</b>             |                       |                          |               |              |                           |                      |                                         |                                     |                               |                                                          |                  |            |
| 1                                        | randomised trials     | not serious <sup>a</sup> | not serious   | not serious  | very serious <sup>b</sup> | none <sup>c</sup>    | 11/30 (36.7%)                           | 11/30 (36.7%)                       | <b>RR 1.00</b> (0.51 to 1.94) | <b>0 fewer per 1,000</b> (from 180 fewer to 345 more)    | ⊕⊕○○<br>LOW      | CRITICAL   |
| <b>Sepsis</b>                            |                       |                          |               |              |                           |                      |                                         |                                     |                               |                                                          |                  |            |
| 1                                        | randomised trials     | serious <sup>d</sup>     | not serious   | not serious  | serious <sup>e</sup>      | none <sup>c</sup>    | 4/30 (13.3%)                            | 16/30 (53.3%)                       | <b>RR 0.25</b> (0.09 to 0.66) | <b>400 fewer per 1,000</b> (from 485 fewer to 181 fewer) | ⊕⊕○○<br>LOW      | IMPORTANT  |
| <b>Duration of Hospital Stay in Days</b> |                       |                          |               |              |                           |                      |                                         |                                     |                               |                                                          |                  |            |
| 1                                        | randomised trials     | serious <sup>d</sup>     | not serious   | not serious  | serious <sup>e</sup>      | none <sup>c</sup>    | 30                                      | 30                                  | -                             | <b>MD 4.4 higher</b> (0.4 higher to 8.4 higher)          | ⊕⊕○○<br>LOW      | IMPORTANT  |
| <b>Mortality</b>                         |                       |                          |               |              |                           |                      |                                         |                                     |                               |                                                          |                  |            |
| 1                                        | observational studies | serious <sup>f</sup>     | not serious   | not serious  | serious <sup>e</sup>      | none <sup>c</sup>    | 73/455 (16.0%)                          | 39/178 (21.9%)                      | <b>RR 0.73</b> (0.52 to 1.04) | <b>59 fewer per 1,000</b> (from 105 fewer to 9 more)     | ⊕○○○<br>VERY LOW | CRITICAL   |

CI: Confidence interval; RR: Risk ratio; MD: Mean difference

### Explanations

- Akbari 2018 is at a high risk of bias with concerns regarding the lack of blinding and concealment. However, the high risk of bias is unlikely to influence mortality outcome.
- Data rated down two levels for wide confidence intervals and low number of events.
- Publication bias not assessed formally given only one study found.
- Akbari 2018 at high risk of bias for concerns regarding the lack of blinding, appropriate allocation and concealment.
- Dated down one level for wide confidence intervals and low number of events.
- Chang 2017 is a retrospective registry study, outcomes were not adjudicated and concerns regarding follow-up. Therefore rated down one level. However, these concerns are unlikely to effect mortality as an outcome

Restrictive vs. Liberal Plasma Transfusion Strategy in non-massively bleeding critically ill patients

Forrest Plots

Restrictive vs. Liberal Plasma Transfusions in non-massively bleeding critically ill patients

RCT

Mortality

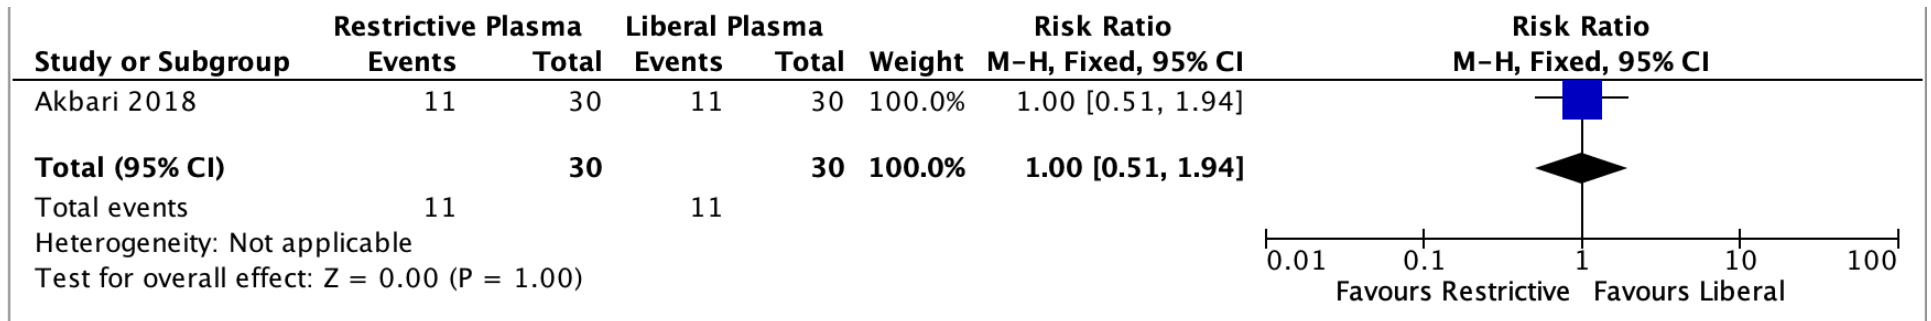

Multiorgan Failure

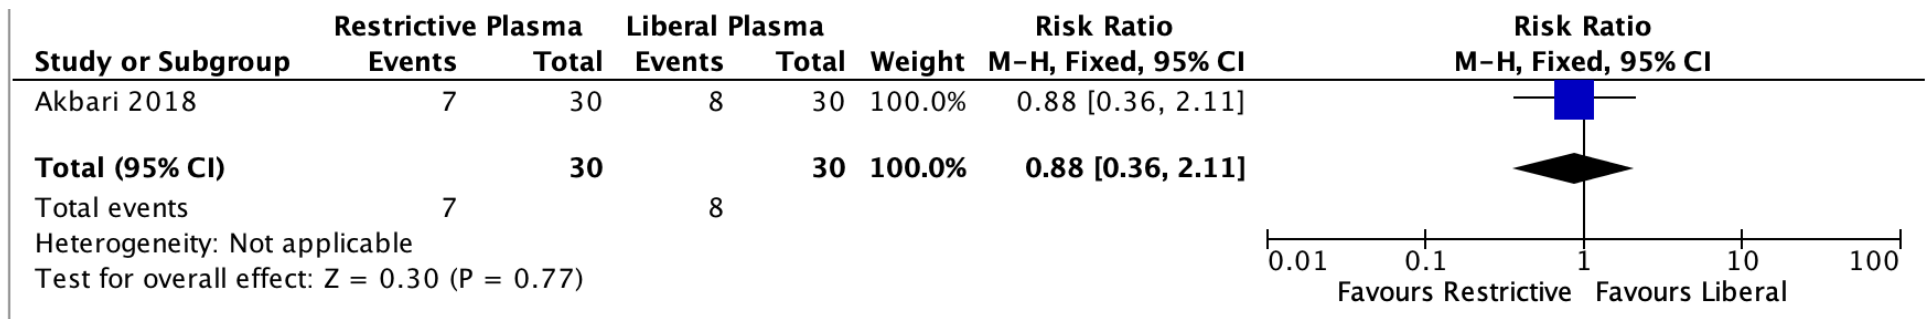

## Sepsis

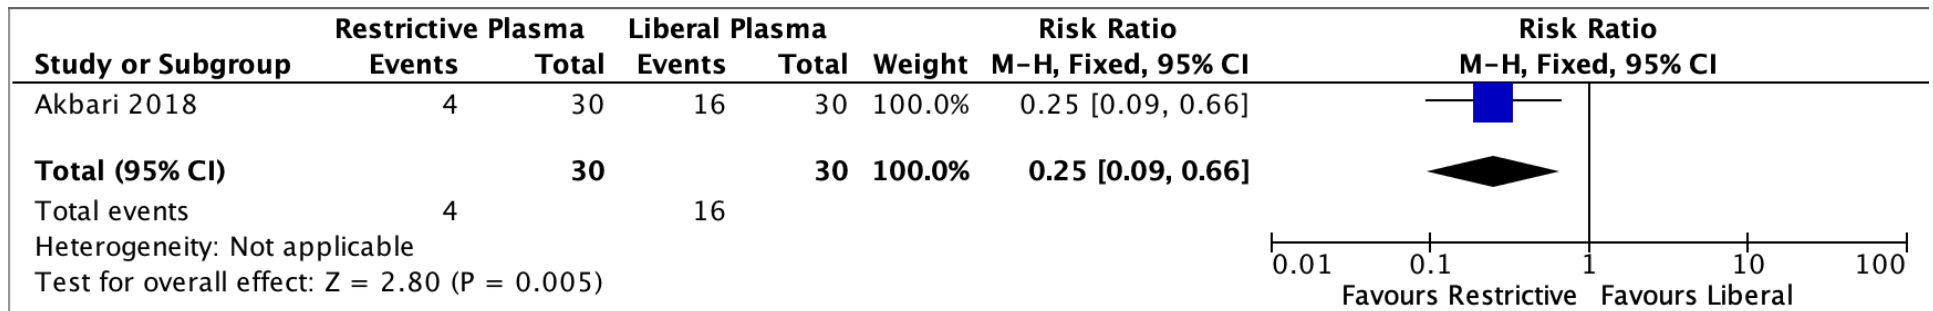

## Duration of Hospital Stay (Days)

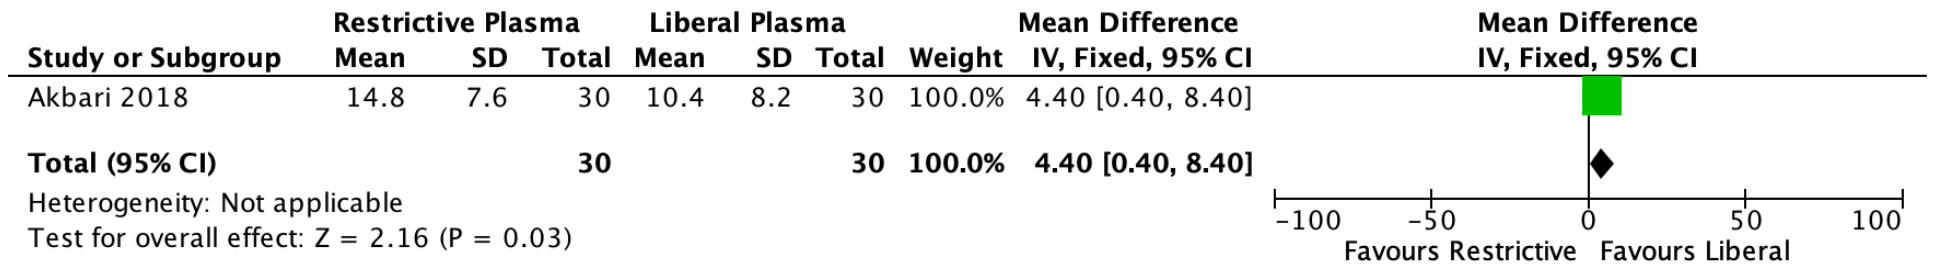

## Observational Study- Neuro

### Mortality



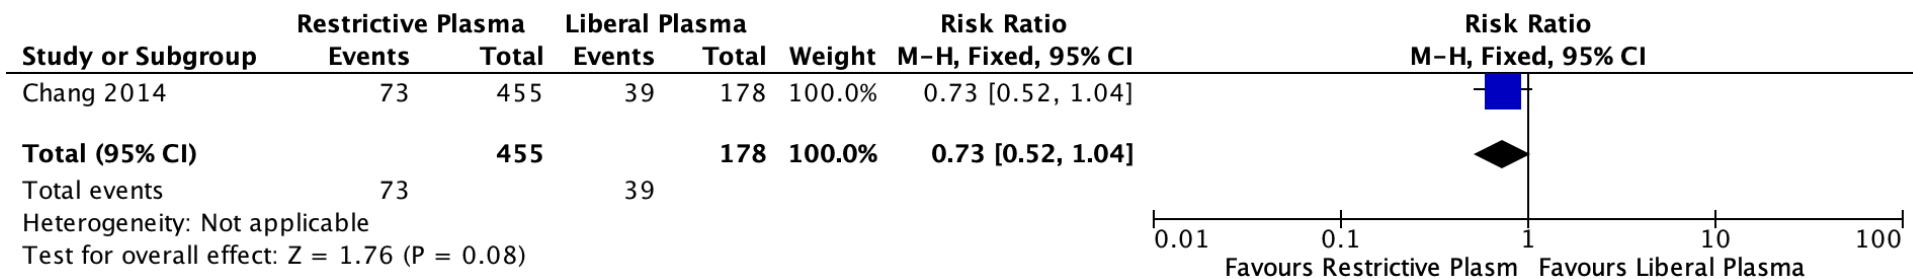

***Evidence summary: Point of care vs. conventional coagulation testing in non-massively bleeding critically ill adults***

*See evidence summary 5: evidence summaries for point of care vs. conventional coagulation testing in massively bleeding critically ill adults and non-massively bleeding critically ill adults*

**Evidence Summary 10: Tranexamic acid in critically ill patients with traumatic bleeding, including traumatic brain injury**

## TXA in massively bleeding critically ill patients

Table 1: Trauma

| Certainty assessment                   |              |               |              |             |                      | № of patients      |                    | Effect                           |                                                         | Certainty    | Importance |
|----------------------------------------|--------------|---------------|--------------|-------------|----------------------|--------------------|--------------------|----------------------------------|---------------------------------------------------------|--------------|------------|
| № of studies                           | Risk of bias | Inconsistency | Indirectness | Imprecision | Other considerations | TXA                | No TXA             | Relative (95% CI)                | Absolute (95% CI)                                       |              |            |
| <b>Mortality - Trauma</b>              |              |               |              |             |                      |                    |                    |                                  |                                                         |              |            |
| 1 RCT                                  | not serious  | not serious   | not serious  | not serious | none                 | 1463/10060 (14.5%) | 1613/10067 (16.0%) | <b>RR 0.91</b><br>(0.85 to 0.97) | <b>14 fewer per 1,000</b><br>(from 24 fewer to 5 fewer) | ⊕⊕⊕⊕<br>HIGH | CRITICAL   |
| <b>Stroke - Trauma</b>                 |              |               |              |             |                      |                    |                    |                                  |                                                         |              |            |
| 1 RCT                                  | not serious  | not serious   | not serious  | not serious | none                 | 57/10060 (0.6%)    | 66/10067 (0.7%)    | <b>RR 0.86</b><br>(0.61 to 1.23) | <b>1 fewer per 1,000</b><br>(from 3 fewer to 2 more)    | ⊕⊕⊕⊕<br>HIGH | CRITICAL   |
| <b>Myocardial infarction - Trauma</b>  |              |               |              |             |                      |                    |                    |                                  |                                                         |              |            |
| 1 RCT                                  | not serious  | not serious   | not serious  | not serious | none                 | 35/10060 (0.3%)    | 55/10067 (0.5%)    | <b>RR 0.64</b><br>(0.42 to 0.97) | <b>2 fewer per 1,000</b><br>(from 3 fewer to 0 fewer)   | ⊕⊕⊕⊕<br>HIGH | CRITICAL   |
| <b>Deep venous thrombosis - Trauma</b> |              |               |              |             |                      |                    |                    |                                  |                                                         |              |            |
| 1 RCT                                  | not serious  | not serious   | not serious  | not serious | none                 | 40/10060 (0.4%)    | 41/10067 (0.4%)    | <b>RR 0.98</b><br>(0.63 to 1.51) | <b>0 fewer per 1,000</b><br>(from 2 fewer to 2 more)    | ⊕⊕⊕⊕<br>HIGH | IMPORTANT  |
| <b>Pulmonary embolism - Trauma</b>     |              |               |              |             |                      |                    |                    |                                  |                                                         |              |            |
| 1 RCT                                  | not serious  | not serious   | not serious  | not serious | none                 | 72/10060 (0.7%)    | 71/10067 (0.7%)    | <b>RR 1.01</b><br>(0.73 to 1.41) | <b>0 fewer per 1,000</b><br>(from 2 fewer to 3 more)    | ⊕⊕⊕⊕<br>HIGH | IMPORTANT  |
| <b>Surgical intervention - Trauma</b>  |              |               |              |             |                      |                    |                    |                                  |                                                         |              |            |
| 1 RCT                                  | not serious  | not serious   | not serious  | not serious | none                 | 4814/10060 (47.9%) | 4836/10067 (48.0%) | <b>RR 1.00</b><br>(0.97 to 1.03) | <b>0 fewer per 1,000</b><br>(from 14 fewer to 14 more)  | ⊕⊕⊕⊕<br>HIGH | IMPORTANT  |
| <b>RBC transfusion - Trauma</b>        |              |               |              |             |                      |                    |                    |                                  |                                                         |              |            |
| 1 RCT                                  | not serious  | not serious   | not serious  | not serious | none                 | 5067/10060 (50.4%) | 5160/10067 (51.3%) | <b>RR 0.98</b><br>(0.96 to 1.01) | <b>10 fewer per 1,000</b><br>(from 21 fewer to 5 more)  | ⊕⊕⊕⊕<br>HIGH | IMPORTANT  |
| <b>RBCs transfused - Trauma</b>        |              |               |              |             |                      |                    |                    |                                  |                                                         |              |            |
| 1 RCT                                  | not serious  | not serious   | not serious  | not serious | none                 | 10060              | 10067              | -                                | <b>MD 0.17 lower</b><br>(0.39 lower to 0.05 higher)     | ⊕⊕⊕⊕<br>HIGH | IMPORTANT  |

CI: Confidence interval; RR: Risk ratio; MD: Mean difference

## TXA in massively bleeding critically ill patients

Table 2: Traumatic brain injury

| Certainty assessment                                    |              |               |              |                      |                      | No of patients    |                   | Effect                           |                                                         | Certainty        | Importance |
|---------------------------------------------------------|--------------|---------------|--------------|----------------------|----------------------|-------------------|-------------------|----------------------------------|---------------------------------------------------------|------------------|------------|
| No of studies                                           | Risk of bias | Inconsistency | Indirectness | Imprecision          | Other considerations | TXA               | No TXA            | Relative (95% CI)                | Absolute (95% CI)                                       |                  |            |
| <b>Mortality - Traumatic brain injury</b>               |              |               |              |                      |                      |                   |                   |                                  |                                                         |                  |            |
| 6 RCTs                                                  | not serious  | not serious   | not serious  | serious <sup>a</sup> | none                 | 1074/5382 (20.0%) | 1109/5239 (21.2%) | <b>RR 0.88</b><br>(0.72 to 1.06) | <b>25 fewer per 1,000</b><br>(from 59 fewer to 13 more) | ⊕⊕⊕○<br>MODERATE | CRITICAL   |
| <b>Poor functional outcome - Traumatic brain injury</b> |              |               |              |                      |                      |                   |                   |                                  |                                                         |                  |            |
| 5 RCTs                                                  | not serious  | not serious   | not serious  | serious <sup>a</sup> | none                 | 214/769 (27.8%)   | 225/725 (31.0%)   | <b>RR 0.89</b><br>(0.76 to 1.04) | <b>34 fewer per 1,000</b><br>(from 74 fewer to 12 more) | ⊕⊕⊕○<br>MODERATE | CRITICAL   |
| <b>Stroke - Traumatic brain injury</b>                  |              |               |              |                      |                      |                   |                   |                                  |                                                         |                  |            |
| 3 RCTs                                                  | not serious  | not serious   | not serious  | not serious          | none                 | 46/6612 (0.7%)    | 43/6537 (0.7%)    | <b>RR 1.06</b><br>(0.70 to 1.60) | <b>0 fewer per 1,000</b><br>(from 2 fewer to 4 more)    | ⊕⊕⊕⊕<br>HIGH     | CRITICAL   |
| <b>Myocardial infarction - Traumatic brain injury</b>   |              |               |              |                      |                      |                   |                   |                                  |                                                         |                  |            |
| 3 RCTs                                                  | not serious  | not serious   | not serious  | not serious          | none                 | 19/6612 (0.3%)    | 23/6537 (0.4%)    | <b>RR 0.83</b><br>(0.46 to 1.49) | <b>1 fewer per 1,000</b><br>(from 2 fewer to 2 more)    | ⊕⊕⊕⊕<br>HIGH     | CRITICAL   |
| <b>Renal failure - Traumatic brain injury</b>           |              |               |              |                      |                      |                   |                   |                                  |                                                         |                  |            |
| 1 RCT                                                   | not serious  | not serious   | not serious  | not serious          | none                 | 100/6359 (1.6%)   | 84/6280 (1.3%)    | <b>RR 1.18</b><br>(0.88 to 1.57) | <b>2 more per 1,000</b><br>(from 2 fewer to 8 more)     | ⊕⊕⊕⊕<br>HIGH     | CRITICAL   |
| <b>Sepsis - Traumatic brain injury</b>                  |              |               |              |                      |                      |                   |                   |                                  |                                                         |                  |            |
| 1 RCT                                                   | not serious  | not serious   | not serious  | not serious          | none                 | 411/6359 (6.5%)   | 412/6280 (6.6%)   | <b>RR 0.99</b><br>(0.86 to 1.12) | <b>1 fewer per 1,000</b><br>(from 9 fewer to 8 more)    | ⊕⊕⊕⊕<br>HIGH     | CRITICAL   |
| <b>Deep venous thrombosis - Traumatic brain injury</b>  |              |               |              |                      |                      |                   |                   |                                  |                                                         |                  |            |
| 4 RCTs                                                  | not serious  | not serious   | not serious  | not serious          | none                 | 22/6708 (0.3%)    | 22/6621 (0.3%)    | <b>RR 0.98</b><br>(0.55 to 1.74) | <b>0 fewer per 1,000</b><br>(from 1 fewer to 2 more)    | ⊕⊕⊕⊕<br>HIGH     | CRITICAL   |
| <b>Pulmonary embolism - Traumatic brain injury</b>      |              |               |              |                      |                      |                   |                   |                                  |                                                         |                  |            |

## TXA in massively bleeding critically ill patients

|                                                                     |             |             |             |                      |      |                 |                 |                                  |                                                          |                  |           |
|---------------------------------------------------------------------|-------------|-------------|-------------|----------------------|------|-----------------|-----------------|----------------------------------|----------------------------------------------------------|------------------|-----------|
| 4 RCTs                                                              | not serious | not serious | not serious | not serious          | none | 35/6708 (0.5%)  | 34/6621 (0.5%)  | <b>RR 0.99</b><br>(0.62 to 1.59) | <b>0 fewer per 1,000</b><br>(from 2 fewer to 3 more)     | ⊕⊕⊕⊕<br>HIGH     | CRITICAL  |
| <b>Surgical intervention - Traumatic brain injury</b>               |             |             |             |                      |      |                 |                 |                                  |                                                          |                  |           |
| 4 RCTs                                                              | not serious | not serious | not serious | serious <sup>a</sup> | none | 31/327 (9.5%)   | 33/332 (9.9%)   | <b>RR 0.96</b><br>(0.61 to 1.51) | <b>4 fewer per 1,000</b><br>(from 39 fewer to 51 more)   | ⊕⊕⊕○<br>MODERATE | IMPORTANT |
| <b>Progressive intracranial hemorrhage - Traumatic brain injury</b> |             |             |             |                      |      |                 |                 |                                  |                                                          |                  |           |
| 3 RCTs                                                              | not serious | not serious | not serious | not serious          | none | 80/311 (25.7%)  | 105/316 (33.2%) | <b>RR 0.78</b><br>(0.61 to 0.99) | <b>73 fewer per 1,000</b><br>(from 130 fewer to 3 fewer) | ⊕⊕⊕⊕<br>HIGH     | IMPORTANT |
| <b>Seizure - Traumatic brain injury</b>                             |             |             |             |                      |      |                 |                 |                                  |                                                          |                  |           |
| 2 RCTs                                                              | not serious | not serious | not serious | not serious          | none | 213/6705 (3.2%) | 189/6589 (2.9%) | <b>RR 1.11</b><br>(0.92 to 1.35) | <b>3 more per 1,000</b><br>(from 2 fewer to 10 more)     | ⊕⊕⊕⊕<br>HIGH     | IMPORTANT |
| <b>RBC transfusion - Traumatic brain injury</b>                     |             |             |             |                      |      |                 |                 |                                  |                                                          |                  |           |
| 2 RCTs                                                              | not serious | not serious | not serious | serious <sup>a</sup> | none | 72/253 (28.5%)  | 85/257 (33.1%)  | <b>RR 0.86</b><br>(0.66 to 1.12) | <b>46 fewer per 1,000</b><br>(from 112 fewer to 40 more) | ⊕⊕⊕○<br>MODERATE | IMPORTANT |
| <b>ICU length of stay - Traumatic brain injury</b>                  |             |             |             |                      |      |                 |                 |                                  |                                                          |                  |           |
| 2 RCTs                                                              | not serious | not serious | not serious | serious <sup>b</sup> | none | 170             | 159             | -                                | <b>MD 2.85 higher</b><br>(0.07 lower to 5.76 higher)     | ⊕⊕⊕○<br>MODERATE | IMPORTANT |
| <b>Hospital length of stay - Traumatic brain injury</b>             |             |             |             |                      |      |                 |                 |                                  |                                                          |                  |           |
| 2 RCTs                                                              | not serious | not serious | not serious | serious <sup>a</sup> | none | 170             | 159             | -                                | <b>MD 0.3 lower</b><br>(3.39 lower to 2.79 higher)       | ⊕⊕⊕○<br>MODERATE | IMPORTANT |

CI: Confidence interval; RR: Risk ratio; MD: Mean difference

### Explanations

a. Significant imprecision which does not exclude clinically meaningful benefit or harm.

b. Borderline statistically significant result, but small sample size resulting in serious imprecision.

## TXA in massively bleeding critically ill patients

### 1. Mortality

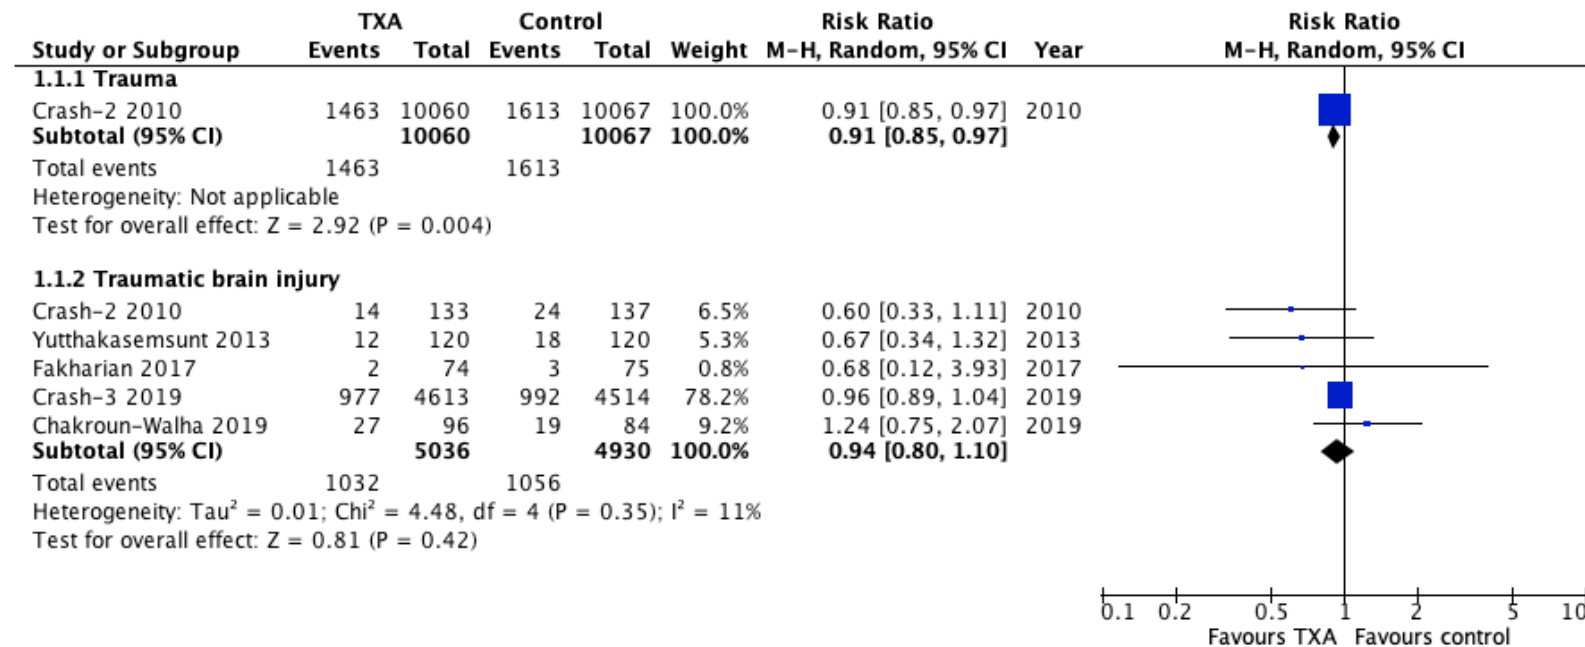

### 2. Poor functional outcome

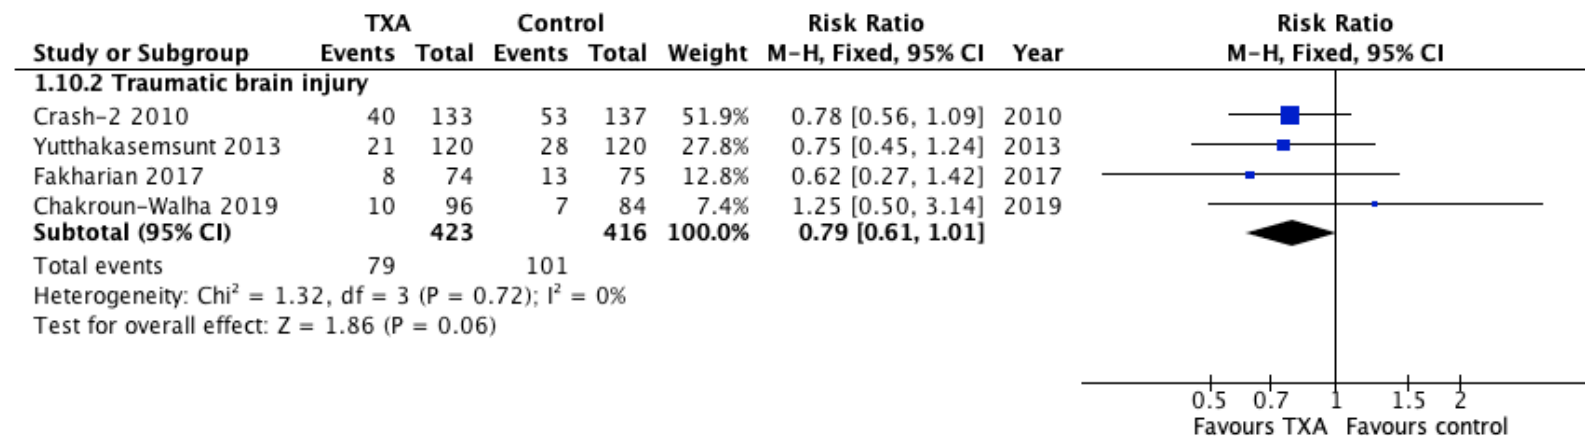

## TXA in massively bleeding critically ill patients

### 3. Stroke

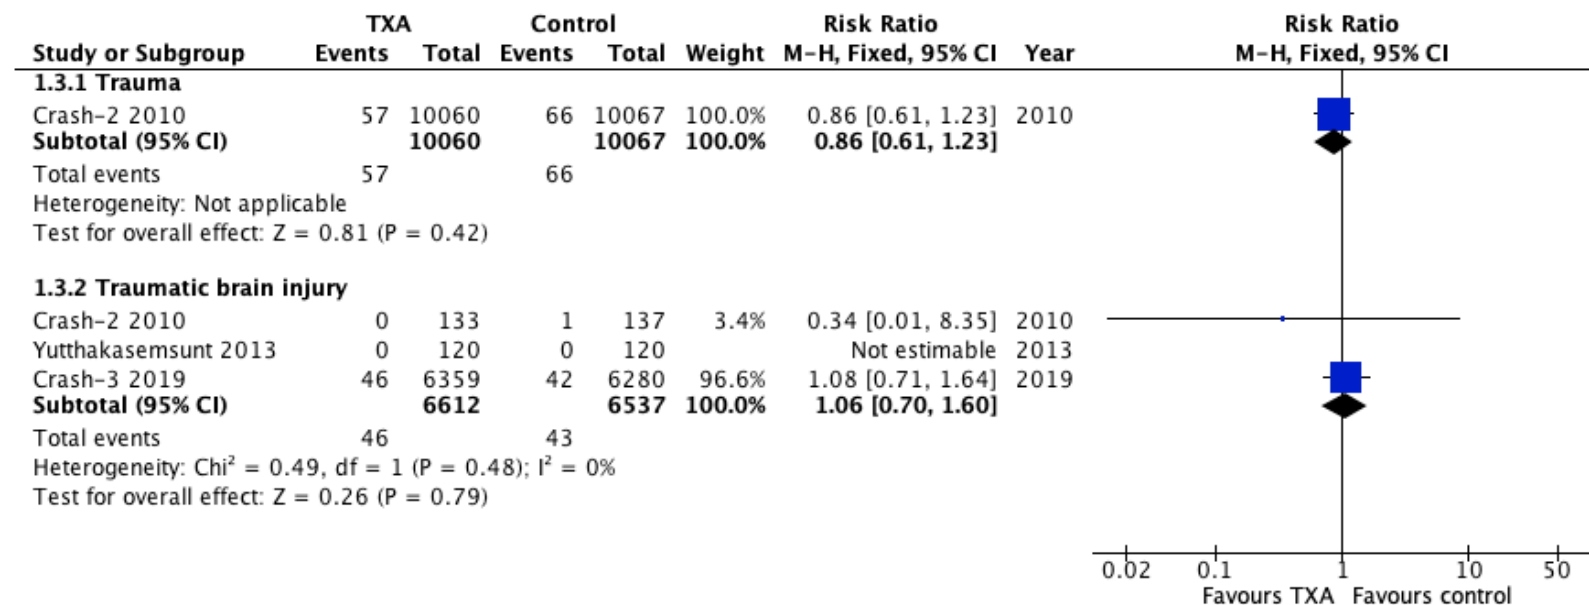

### 4. Myocardial infarction

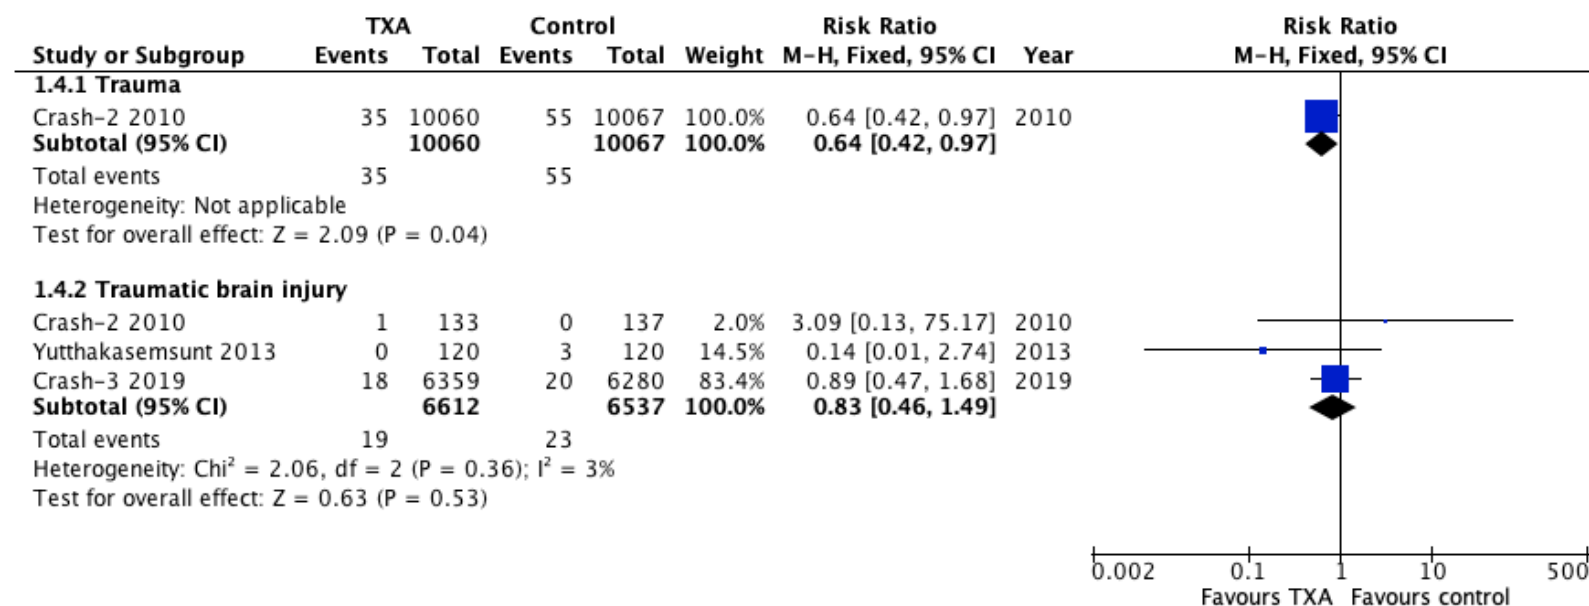



## TXA in massively bleeding critically ill patients

### 5. Deep venous thrombosis

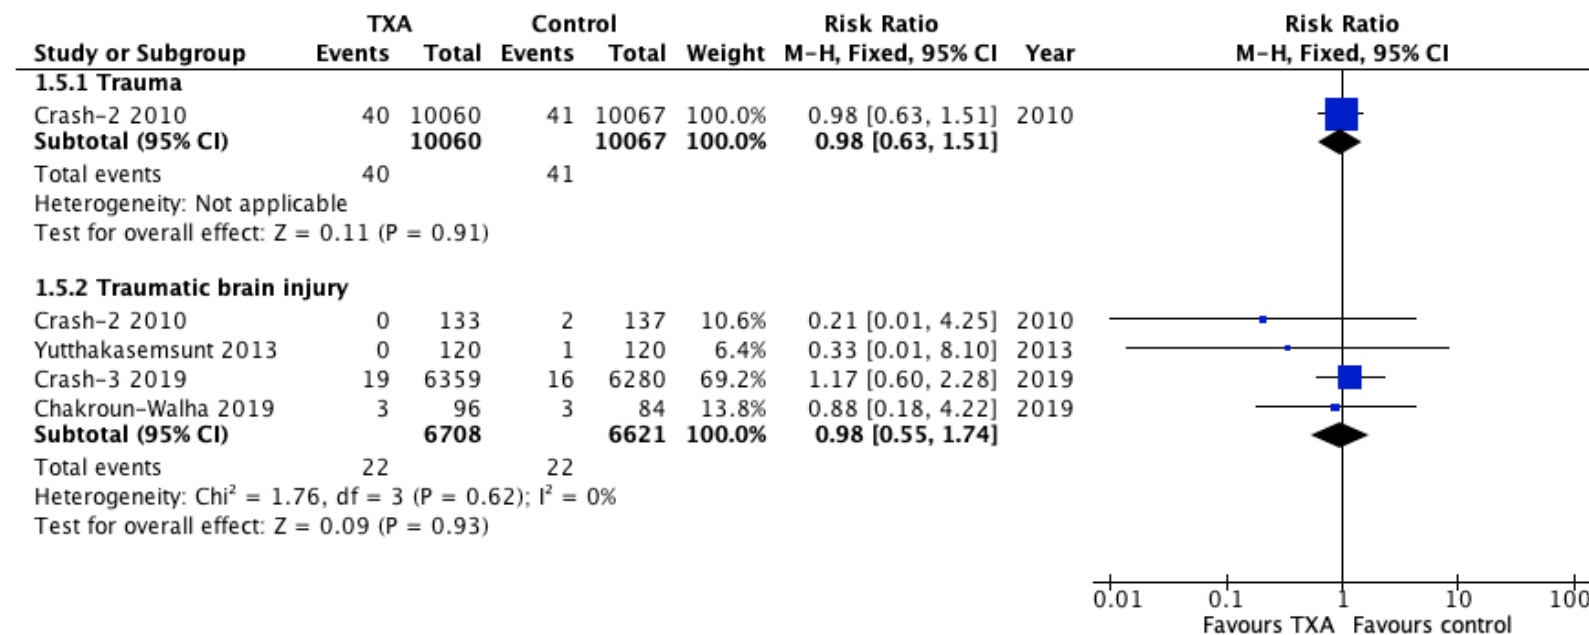

### 6. Pulmonary embolism

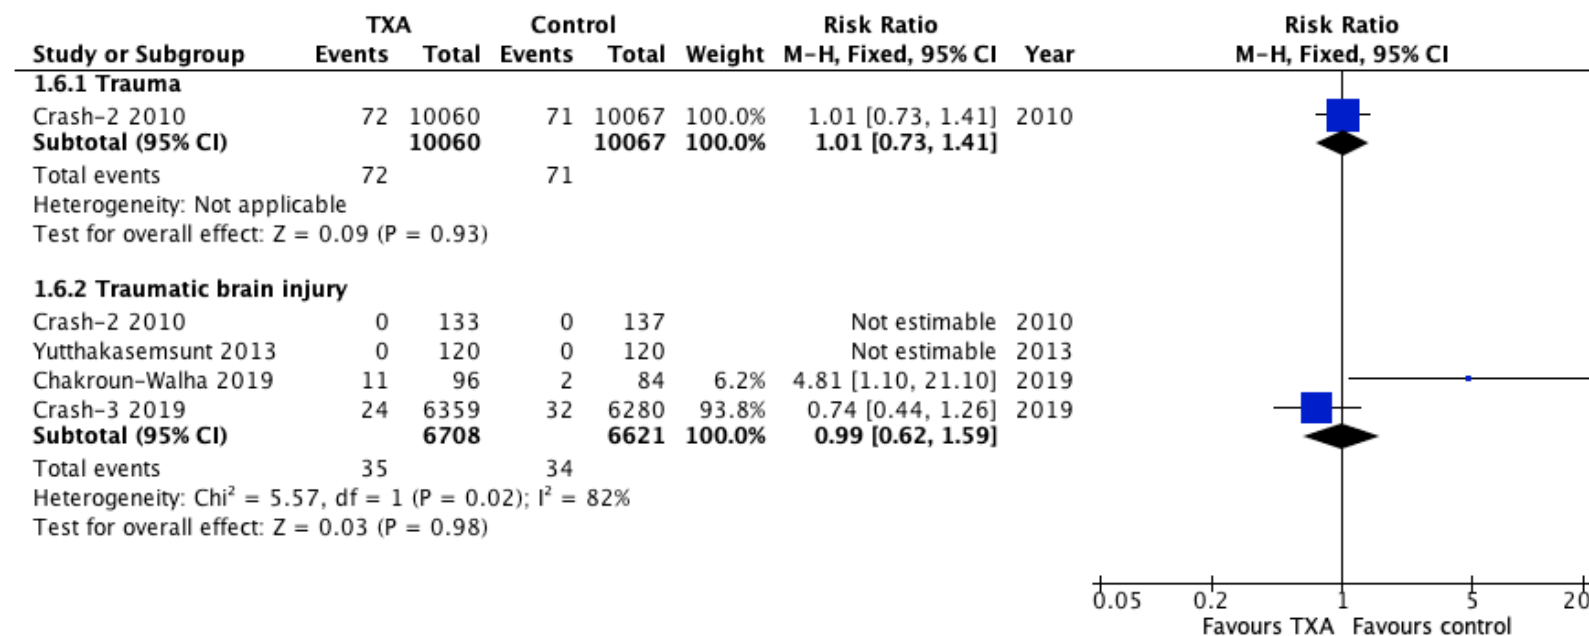

## TXA in massively bleeding critically ill patients

### 7. Progressive intracranial hemorrhage

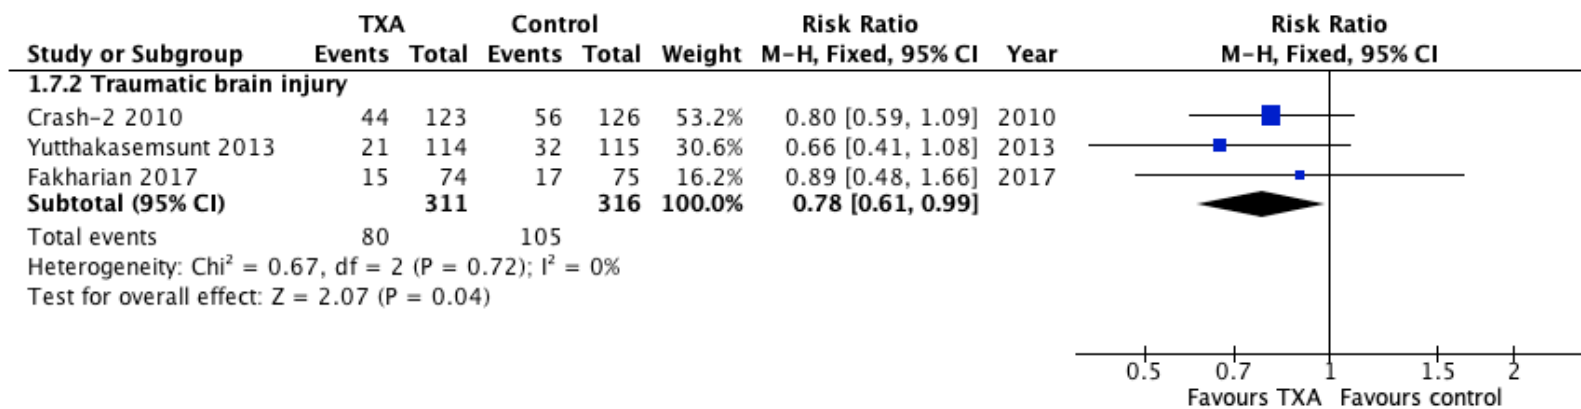

### 8. Surgical intervention (note: though specified as an outcome in the manuscript, CRASH-3 did not report need for neurosurgery in the manuscript)

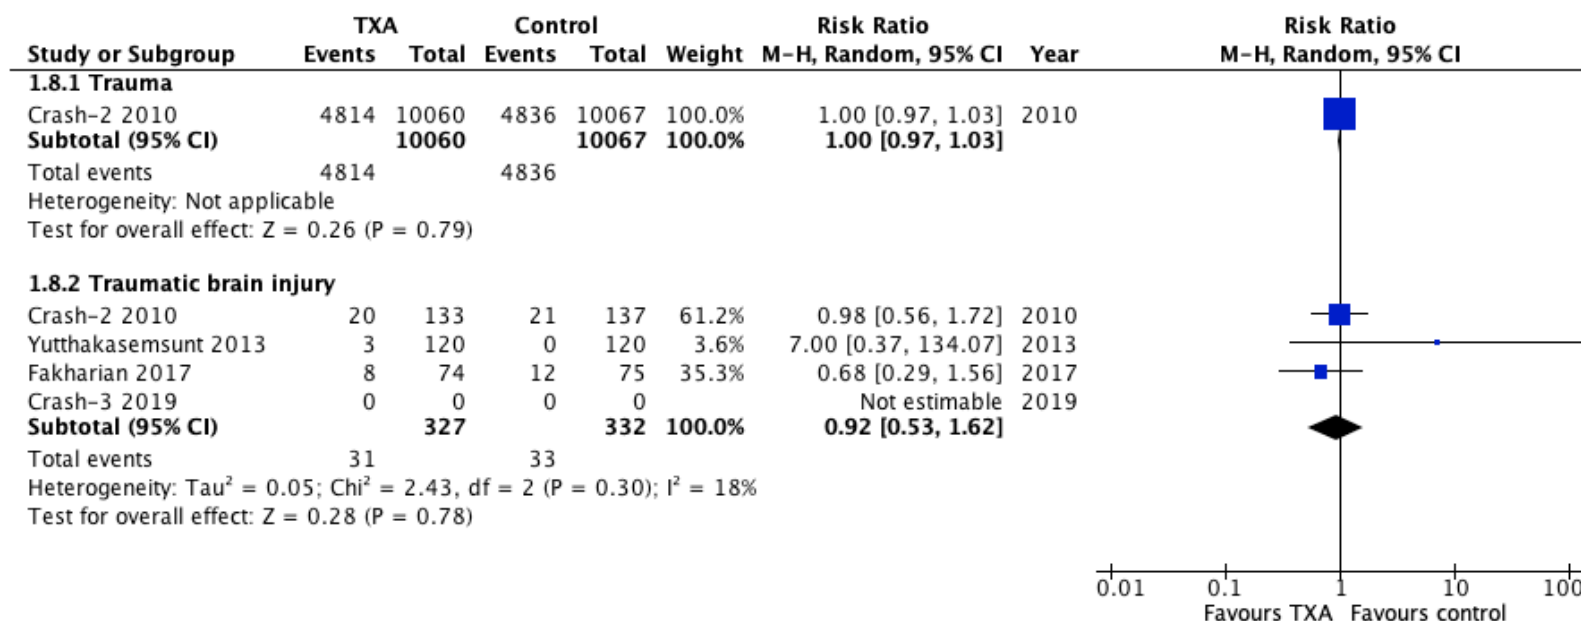

## TXA in massively bleeding critically ill patients

### 9. Sepsis/infection

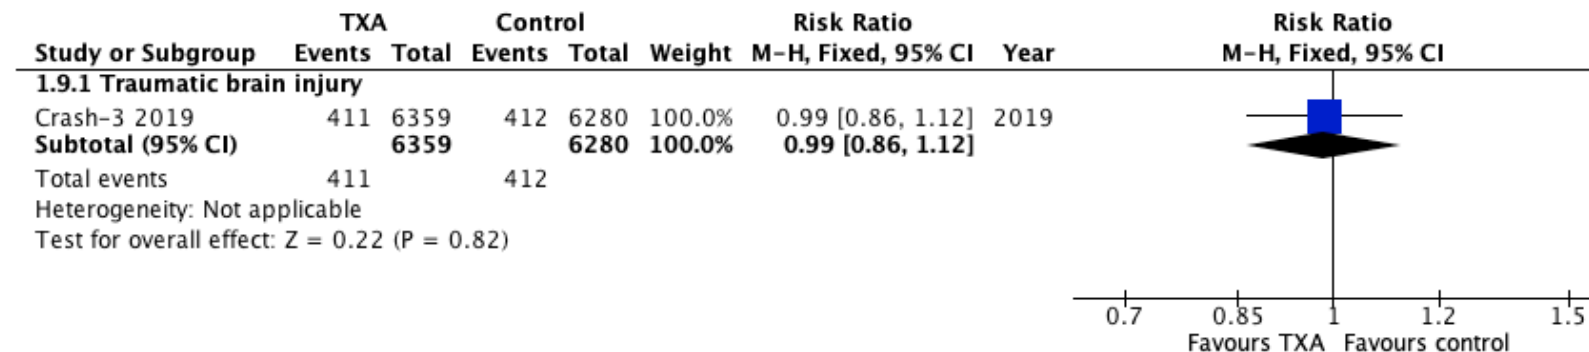

### 10. Seizure

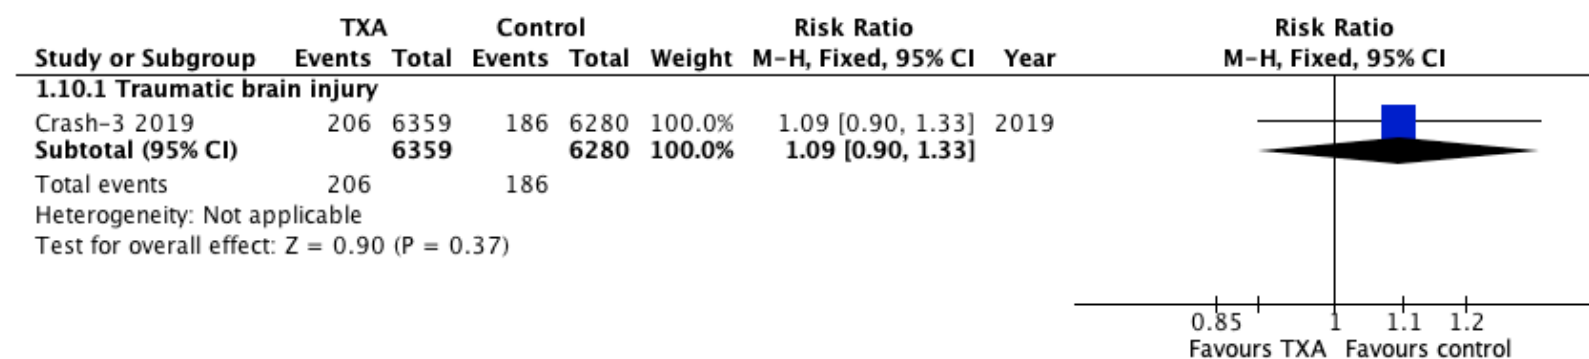

### 11. Renal failure

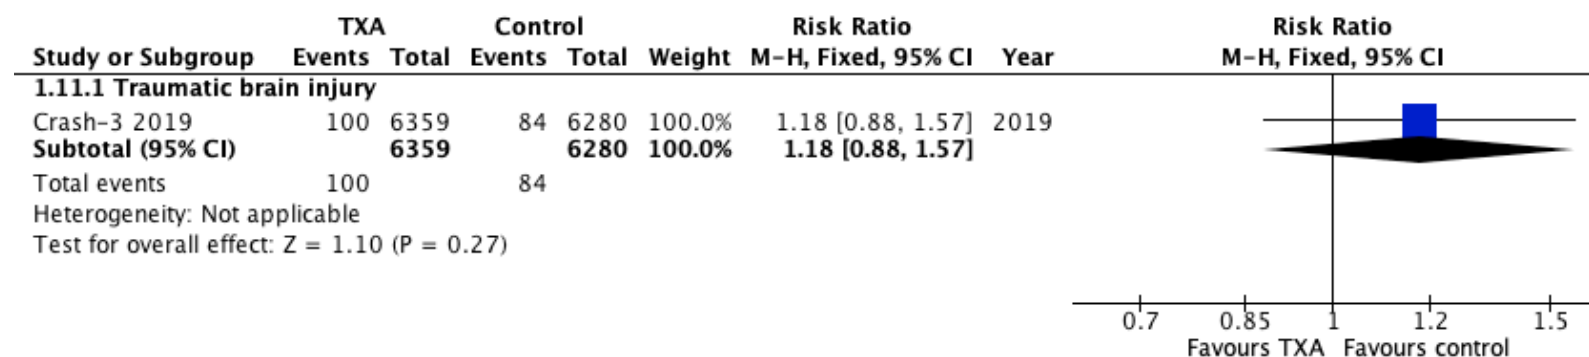

## TXA in massively bleeding critically ill patients

### 11. RBC Transfusion

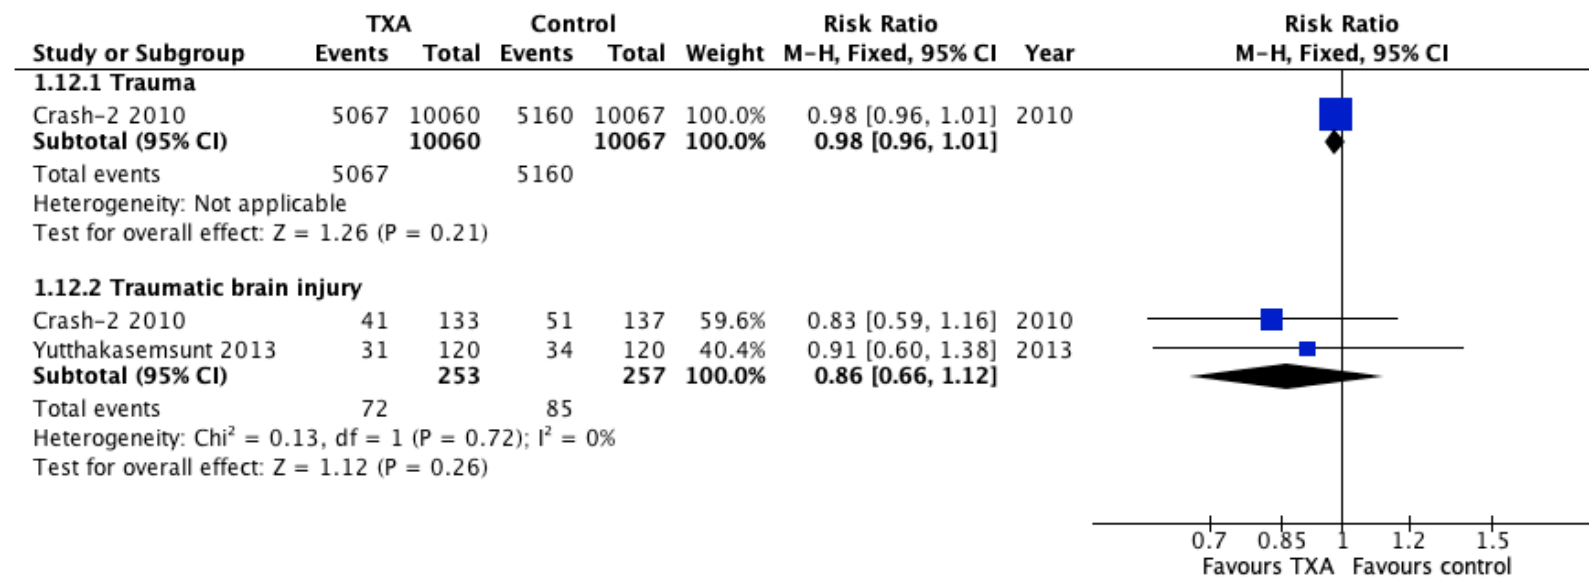

### 12. RBCs transfused

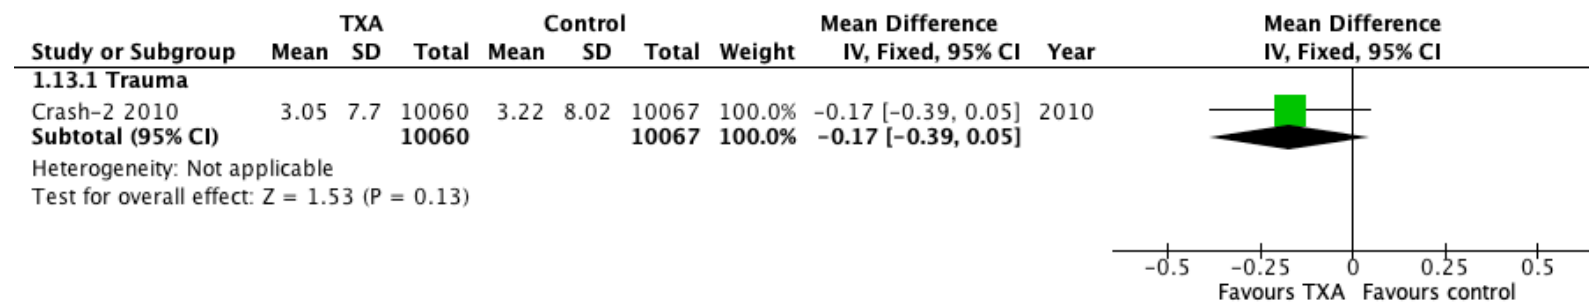

## TXA in massively bleeding critically ill patients

### 13. ICU length of stay

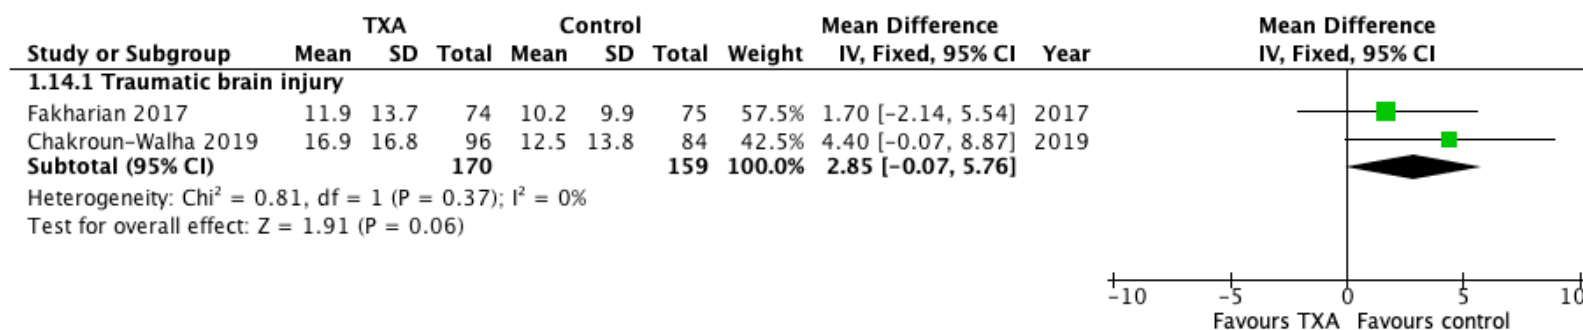

### 14. Hospital length of stay

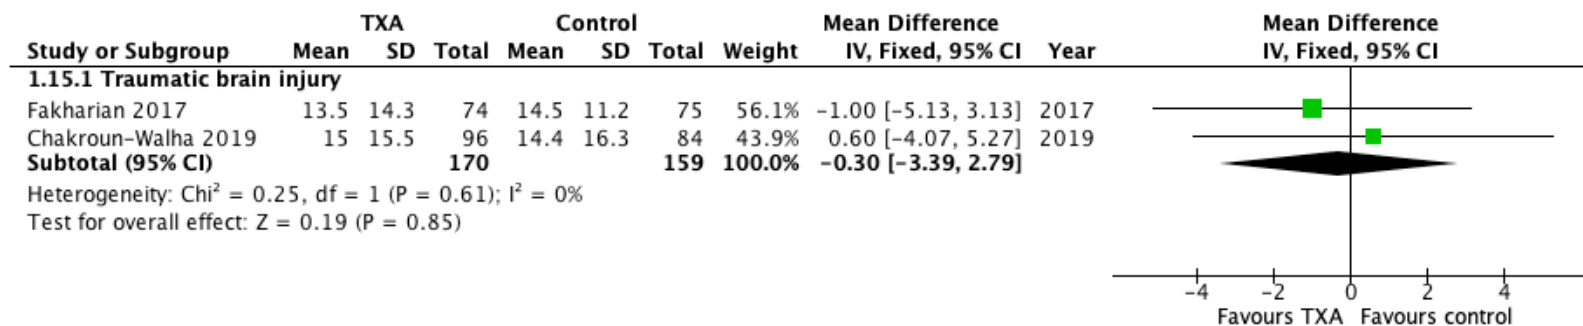

**Evidence Summary 11: Tranexamic acid in critically ill patients with subarachnoid hemorrhage, non-traumatic intracranial hemorrhage, postpartum hemorrhage, and post-cardiac surgery**

*See evidence summary 12 for tranexamic acid in critically ill patients with GI bleeding*

## TXA in non-massively bleeding critically ill patients

**Table 1: Cardiac surgery**

| Certainty assessment                             |              |                          |              |             |                      | № of patients     |                   | Effect                            |                                                             | Certainty    | Importance |
|--------------------------------------------------|--------------|--------------------------|--------------|-------------|----------------------|-------------------|-------------------|-----------------------------------|-------------------------------------------------------------|--------------|------------|
| № of studies                                     | Risk of bias | Inconsistency            | Indirectness | Imprecision | Other considerations | TXA               | no TXA            | Relative (95% CI)                 | Absolute (95% CI)                                           |              |            |
| <b>Mortality - Cardiac surgery</b>               |              |                          |              |             |                      |                   |                   |                                   |                                                             |              |            |
| 36 RCTs                                          | not serious  | not serious              | not serious  | not serious | none                 | 40/4419 (0.9%)    | 53/4354 (1.2%)    | <b>RR 0.75</b><br>(0.50 to 1.13)  | <b>3 fewer per 1,000</b><br>(from 6 fewer to 2 more)        | ⊕⊕⊕⊕<br>HIGH | CRITICAL   |
| <b>Post-operative bleeding - Cardiac surgery</b> |              |                          |              |             |                      |                   |                   |                                   |                                                             |              |            |
| 56 RCTs                                          | not serious  | not serious <sup>a</sup> | not serious  | not serious | none                 | 5273              | 5015              | -                                 | <b>MD 268.52 lower</b><br>(314.99 lower to 222.04 lower)    | ⊕⊕⊕⊕<br>HIGH | IMPORTANT  |
| <b>Surgical intervention - Cardiac surgery</b>   |              |                          |              |             |                      |                   |                   |                                   |                                                             |              |            |
| 25 RCTs                                          | not serious  | not serious              | not serious  | not serious | none                 | 69/3797 (1.8%)    | 140/3778 (3.7%)   | <b>RR 0.53</b><br>(0.40 to 0.71)  | <b>17 fewer per 1,000</b><br>(from 22 fewer to 11 fewer)    | ⊕⊕⊕⊕<br>HIGH | IMPORTANT  |
| <b>Seizure - Cardiac surgery</b>                 |              |                          |              |             |                      |                   |                   |                                   |                                                             |              |            |
| 7 RCTs                                           | not serious  | not serious              | not serious  | not serious | none                 | 20/2794 (0.7%)    | 4/2821 (0.1%)     | <b>RR 4.11</b><br>(1.44 to 11.72) | <b>4 more per 1,000</b><br>(from 1 more to 15 more)         | ⊕⊕⊕⊕<br>HIGH | IMPORTANT  |
| <b>RBC transfusion - Cardiac surgery</b>         |              |                          |              |             |                      |                   |                   |                                   |                                                             |              |            |
| 25 RCTs                                          | not serious  | not serious              | not serious  | not serious | none                 | 1272/3755 (33.9%) | 1843/3738 (49.3%) | <b>RR 0.67</b><br>(0.60 to 0.74)  | <b>163 fewer per 1,000</b><br>(from 197 fewer to 128 fewer) | ⊕⊕⊕⊕<br>HIGH | IMPORTANT  |

CI: Confidence interval; RR: Risk ratio; MD: Mean difference

### Explanations

a. Although very high value of I-squared (97%) the vast majority of trials demonstrate an effect estimate in favour of TXA without any clear signal of harm.

## TXA in non-massively bleeding critically ill patients

Table 2: Obstetric bleeding

| Certainty assessment                               |              |               |              |                          |                      | No of patients   |                  | Effect                           |                                                       | Certainty    | Importance |
|----------------------------------------------------|--------------|---------------|--------------|--------------------------|----------------------|------------------|------------------|----------------------------------|-------------------------------------------------------|--------------|------------|
| No of studies                                      | Risk of bias | Inconsistency | Indirectness | Imprecision              | Other considerations | TXA              | no TXA           | Relative (95% CI)                | Absolute (95% CI)                                     |              |            |
| <b>Mortality - Obstetric bleeding</b>              |              |               |              |                          |                      |                  |                  |                                  |                                                       |              |            |
| 2 RCTs                                             | not serious  | not serious   | not serious  | not serious <sup>a</sup> | none                 | 227/10108 (2.2%) | 256/10057 (2.5%) | <b>RR 0.88</b><br>(0.74 to 1.05) | <b>3 fewer per 1,000</b><br>(from 7 fewer to 1 more)  | ⊕⊕⊕⊕<br>HIGH | CRITICAL   |
| <b>Stroke - Obstetric bleeding</b>                 |              |               |              |                          |                      |                  |                  |                                  |                                                       |              |            |
| 2 RCTs                                             | not serious  | not serious   | not serious  | not serious              | none                 | 8/10104 (0.1%)   | 6/10057 (0.1%)   | <b>RR 1.33</b><br>(0.46 to 3.82) | <b>0 fewer per 1,000</b><br>(from 0 fewer to 2 more)  | ⊕⊕⊕⊕<br>HIGH | CRITICAL   |
| <b>Myocardial infarction - Obstetric bleeding</b>  |              |               |              |                          |                      |                  |                  |                                  |                                                       |              |            |
| 2 RCTs                                             | not serious  | not serious   | not serious  | not serious              | none                 | 2/10104 (0.0%)   | 3/10057 (0.0%)   | <b>RR 0.66</b><br>(0.11 to 3.97) | <b>0 fewer per 1,000</b><br>(from 0 fewer to 1 more)  | ⊕⊕⊕⊕<br>HIGH | CRITICAL   |
| <b>Deep venous thrombosis - Obstetric bleeding</b> |              |               |              |                          |                      |                  |                  |                                  |                                                       |              |            |
| 2 RCTs                                             | not serious  | not serious   | not serious  | not serious              | none                 | 3/10104 (0.0%)   | 7/10057 (0.1%)   | <b>RR 0.43</b><br>(0.11 to 1.65) | <b>0 fewer per 1,000</b><br>(from 1 fewer to 0 fewer) | ⊕⊕⊕⊕<br>HIGH | CRITICAL   |
| <b>Pulmonary embolism - Obstetric bleeding</b>     |              |               |              |                          |                      |                  |                  |                                  |                                                       |              |            |
| 2 RCTs                                             | not serious  | not serious   | not serious  | not serious              | none                 | 17/10104 (0.2%)  | 20/10057 (0.2%)  | <b>RR 0.85</b><br>(0.44 to 1.61) | <b>0 fewer per 1,000</b><br>(from 1 fewer to 1 more)  | ⊕⊕⊕⊕<br>HIGH | CRITICAL   |
| <b>Sepsis - Obstetric bleeding</b>                 |              |               |              |                          |                      |                  |                  |                                  |                                                       |              |            |
| 1 RCT                                              | not serious  | not serious   | not serious  | not serious              | none                 | 180/10032 (1.8%) | 185/9985 (1.9%)  | <b>RR 0.97</b><br>(0.79 to 1.19) | <b>1 fewer per 1,000</b><br>(from 4 fewer to 4 more)  | ⊕⊕⊕⊕<br>HIGH | IMPORTANT  |
| <b>Renal failure - Obstetric bleeding</b>          |              |               |              |                          |                      |                  |                  |                                  |                                                       |              |            |
| 1 RCT                                              | not serious  | not serious   | not serious  | not serious              | none                 | 129/10032 (1.3%) | 118/9985 (1.2%)  | <b>RR 1.09</b><br>(0.85 to 1.39) | <b>1 more per 1,000</b><br>(from 2 fewer to 5 more)   | ⊕⊕⊕⊕<br>HIGH | IMPORTANT  |
| <b>Seizure - Obstetric bleeding</b>                |              |               |              |                          |                      |                  |                  |                                  |                                                       |              |            |
| 1 RCT                                              | not serious  | not serious   | not serious  | not serious              | none                 | 33/10032 (0.3%)  | 43/9985 (0.4%)   | <b>RR 0.76</b><br>(0.49 to 1.20) | <b>1 fewer per 1,000</b><br>(from 2 fewer to 1 more)  | ⊕⊕⊕⊕<br>HIGH | IMPORTANT  |



## TXA in non-massively bleeding critically ill patients

| Surgical intervention - Obstetric bleeding (hysterectomy) |             |             |             |                      |      |                       |                       |                                  |                                                        |                  |           |
|-----------------------------------------------------------|-------------|-------------|-------------|----------------------|------|-----------------------|-----------------------|----------------------------------|--------------------------------------------------------|------------------|-----------|
| 2 RCTs                                                    | not serious | not serious | not serious | serious <sup>b</sup> | none | 358/10104<br>(3.5%)   | 353/1005<br>7 (3.5%)  | <b>RR 0.93</b><br>(0.46 to 1.89) | <b>2 fewer per 1,000</b><br>(from 19 fewer to 31 more) | ⊕⊕⊕○<br>MODERATE | IMPORTANT |
| RBC transfusion - Obstetric bleeding                      |             |             |             |                      |      |                       |                       |                                  |                                                        |                  |           |
| 2 RCTs                                                    | not serious | not serious | not serious | not serious          | none | 5471/10108<br>(54.1%) | 5439/10057<br>(54.1%) | <b>RR 1.00</b><br>(0.98 to 1.03) | <b>0 fewer per 1,000</b><br>(from 11 fewer to 16 more) | ⊕⊕⊕⊕<br>HIGH     | IMPORTANT |

**CI:** Confidence interval; **RR:** Risk ratio; **MD:** Mean difference

### Explanations

- a. Though the 95% confidence interval crosses 1, the result is very precise and essentially rules out a clinically meaningful increase in mortality (0.1%).
- b. Wide 95% confidence intervals do not exclude clinically significant benefit or harm.

## TXA in non-massively bleeding critically ill patients

**Table 3: Subarachnoid hemorrhage**

| Certainty assessment                                     |                      |                          |              |                      |                      | No of patients   |                  | Effect                           |                                                           | Certainty        | Importance |
|----------------------------------------------------------|----------------------|--------------------------|--------------|----------------------|----------------------|------------------|------------------|----------------------------------|-----------------------------------------------------------|------------------|------------|
| No of studies                                            | Risk of bias         | Inconsistency            | Indirectness | Imprecision          | Other considerations | TXA              | no TXA           | Relative (95% CI)                | Absolute (95% CI)                                         |                  |            |
| <b>Mortality - Subarachnoid hemorrhage</b>               |                      |                          |              |                      |                      |                  |                  |                                  |                                                           |                  |            |
| 10 RCTs                                                  | not serious          | not serious              | not serious  | serious <sup>a</sup> | none                 | 368/1400 (26.3%) | 366/1393 (26.3%) | <b>RR 1.01</b><br>(0.88 to 1.16) | <b>3 more per 1,000</b><br>(from 32 fewer to 42 more)     | ⊕⊕⊕○<br>MODERATE | CRITICAL   |
| <b>Poor functional outcome - Subarachnoid hemorrhage</b> |                      |                          |              |                      |                      |                  |                  |                                  |                                                           |                  |            |
| 5 RCTs                                                   | serious <sup>b</sup> | not serious              | not serious  | serious <sup>a</sup> | none                 | 508/1254 (40.5%) | 486/1247 (39.0%) | <b>RR 1.05</b><br>(0.95 to 1.15) | <b>19 more per 1,000</b><br>(from 19 fewer to 58 more)    | ⊕⊕○○<br>LOW      | CRITICAL   |
| <b>Rebleeding - Subarachnoid hemorrhage</b>              |                      |                          |              |                      |                      |                  |                  |                                  |                                                           |                  |            |
| 10 RCTs                                                  | not serious          | not serious <sup>c</sup> | not serious  | serious <sup>d</sup> | none                 | 157/1400 (11.2%) | 273/1393 (19.6%) | <b>RR 0.60</b><br>(0.44 to 0.80) | <b>78 fewer per 1,000</b><br>(from 110 fewer to 39 fewer) | ⊕⊕⊕○<br>MODERATE | IMPORTANT  |
| <b>Stroke - Subarachnoid hemorrhage</b>                  |                      |                          |              |                      |                      |                  |                  |                                  |                                                           |                  |            |
| 7 RCTs                                                   | serious <sup>b</sup> | not serious <sup>c</sup> | not serious  | serious <sup>d</sup> | none                 | 324/1307 (24.8%) | 273/1299 (21.0%) | <b>RR 1.29</b><br>(1.01 to 1.67) | <b>61 more per 1,000</b><br>(from 2 more to 141 more)     | ⊕⊕○○<br>LOW      | CRITICAL   |

CI: Confidence interval; RR: Risk ratio

### Explanations

- Though statistically significant, optimal information size not met resulting in serious imprecision of the overall estimate.
- Wide 95% confidence intervals do not exclude clinically significant benefit or harm.
- Unclear in several studies whether blinded outcome assessment, leading to an uncertain risk of detection bias.
- Though moderate statistical heterogeneity, it is of questionable clinical significance as almost all trials have similar point estimates with the majority of the 95% CI on the same side of the line of effect.

## TXA in non-massively bleeding critically ill patients

Table 4: Non-traumatic ICH

| Certainty assessment                               |              |               |              |                      |                      | № of patients    |                  | Effect                 |                                               | Certainty        | Importance |
|----------------------------------------------------|--------------|---------------|--------------|----------------------|----------------------|------------------|------------------|------------------------|-----------------------------------------------|------------------|------------|
| № of studies                                       | Risk of bias | Inconsistency | Indirectness | Imprecision          | Other considerations | TXA              | no TXA           | Relative (95% CI)      | Absolute (95% CI)                             |                  |            |
| <b>Mortality - Non-traumatic ICH</b>               |              |               |              |                      |                      |                  |                  |                        |                                               |                  |            |
| 3 RCTs                                             | not serious  | not serious   | not serious  | serious <sup>a</sup> | none                 | 266/1227 (21.7%) | 259/1222 (21.2%) | RR 1.02 (0.88 to 1.19) | 4 more per 1,000 (from 25 fewer to 40 more)   | ⊕⊕⊕○<br>MODERATE | CRITICAL   |
| <b>Poor functional outcome - Non-traumatic ICH</b> |              |               |              |                      |                      |                  |                  |                        |                                               |                  |            |
| 2 RCTs                                             | not serious  | not serious   | not serious  | serious <sup>a</sup> | none                 | 836/1211 (69.0%) | 853/1214 (70.3%) | RR 0.98 (0.93 to 1.04) | 14 fewer per 1,000 (from 49 fewer to 28 more) | ⊕⊕⊕○<br>MODERATE | CRITICAL   |
| <b>Stroke - Non-traumatic ICH</b>                  |              |               |              |                      |                      |                  |                  |                        |                                               |                  |            |
| 2 RCTs                                             | not serious  | not serious   | not serious  | serious <sup>a</sup> | none                 | 17/1211 (1.4%)   | 12/1214 (1.0%)   | RR 1.42 (0.68 to 2.96) | 4 more per 1,000 (from 3 fewer to 19 more)    | ⊕⊕⊕○<br>MODERATE | CRITICAL   |
| <b>Myocardial infarction - Non-traumatic ICH</b>   |              |               |              |                      |                      |                  |                  |                        |                                               |                  |            |
| 2 RCTs                                             | not serious  | not serious   | not serious  | serious <sup>a</sup> | none                 | 11/1211 (0.9%)   | 6/1214 (0.5%)    | RR 1.84 (0.68 to 4.95) | 4 more per 1,000 (from 2 fewer to 20 more)    | ⊕⊕⊕○<br>MODERATE | CRITICAL   |
| <b>Deep venous thrombosis - Non-traumatic ICH</b>  |              |               |              |                      |                      |                  |                  |                        |                                               |                  |            |
| 1 RCT                                              | not serious  | not serious   | not serious  | serious <sup>a</sup> | none                 | 19/1161 (1.6%)   | 14/1164 (1.2%)   | RR 1.36 (0.69 to 2.70) | 4 more per 1,000 (from 4 fewer to 20 more)    | ⊕⊕⊕○<br>MODERATE | CRITICAL   |
| <b>Pulmonary embolism - Non-traumatic ICH</b>      |              |               |              |                      |                      |                  |                  |                        |                                               |                  |            |
| 2 RCTs                                             | not serious  | not serious   | not serious  | serious <sup>a</sup> | none                 | 20/1211 (1.7%)   | 24/1214 (2.0%)   | RR 0.84 (0.47 to 1.50) | 3 fewer per 1,000 (from 10 fewer to 10 more)  | ⊕⊕⊕○<br>MODERATE | CRITICAL   |
| <b>Venous thrombosis - Non-traumatic ICH</b>       |              |               |              |                      |                      |                  |                  |                        |                                               |                  |            |
| 2                                                  | not serious  | not serious   | not serious  | serious <sup>a</sup> | none                 | 40/1177 (3.4%)   | 37/1172 (3.2%)   | RR 1.07 (0.69 to 1.65) | 2 more per 1,000 (from 10 fewer to 21 more)   | ⊕⊕⊕○<br>MODERATE | CRITICAL   |

## TXA in non-massively bleeding critically ill patients

| Seizure - Non-traumatic ICH                 |             |             |             |                      |      |                   |                   |                                  |                                                        |                  |           |
|---------------------------------------------|-------------|-------------|-------------|----------------------|------|-------------------|-------------------|----------------------------------|--------------------------------------------------------|------------------|-----------|
| 1 RCT                                       | not serious | not serious | not serious | serious <sup>a</sup> | none | 77/1161<br>(6.6%) | 85/1164<br>(7.3%) | <b>RR 0.91</b><br>(0.67 to 1.22) | <b>7 fewer per 1,000</b><br>(from 24 fewer to 16 more) | ⊕⊕⊕○<br>MODERATE | CRITICAL  |
| Hospital length of stay - Non-traumatic ICH |             |             |             |                      |      |                   |                   |                                  |                                                        |                  |           |
| 2 RCTs                                      | not serious | not serious | not serious | serious <sup>a</sup> | none | 1177              | 1172              | -                                | <b>MD 0.07 lower</b><br>(3.82 lower to 3.69 higher)    | ⊕⊕⊕○<br>MODERATE | IMPORTANT |

**CI:** Confidence interval; **RR:** Risk ratio; **MD:** Mean difference

### Explanations

a. Wide 95% confidence intervals do not exclude clinically significant benefit or harm.

# TXA in non-massively bleeding critically ill patients

## 1a. Mortality - cardiac surgery

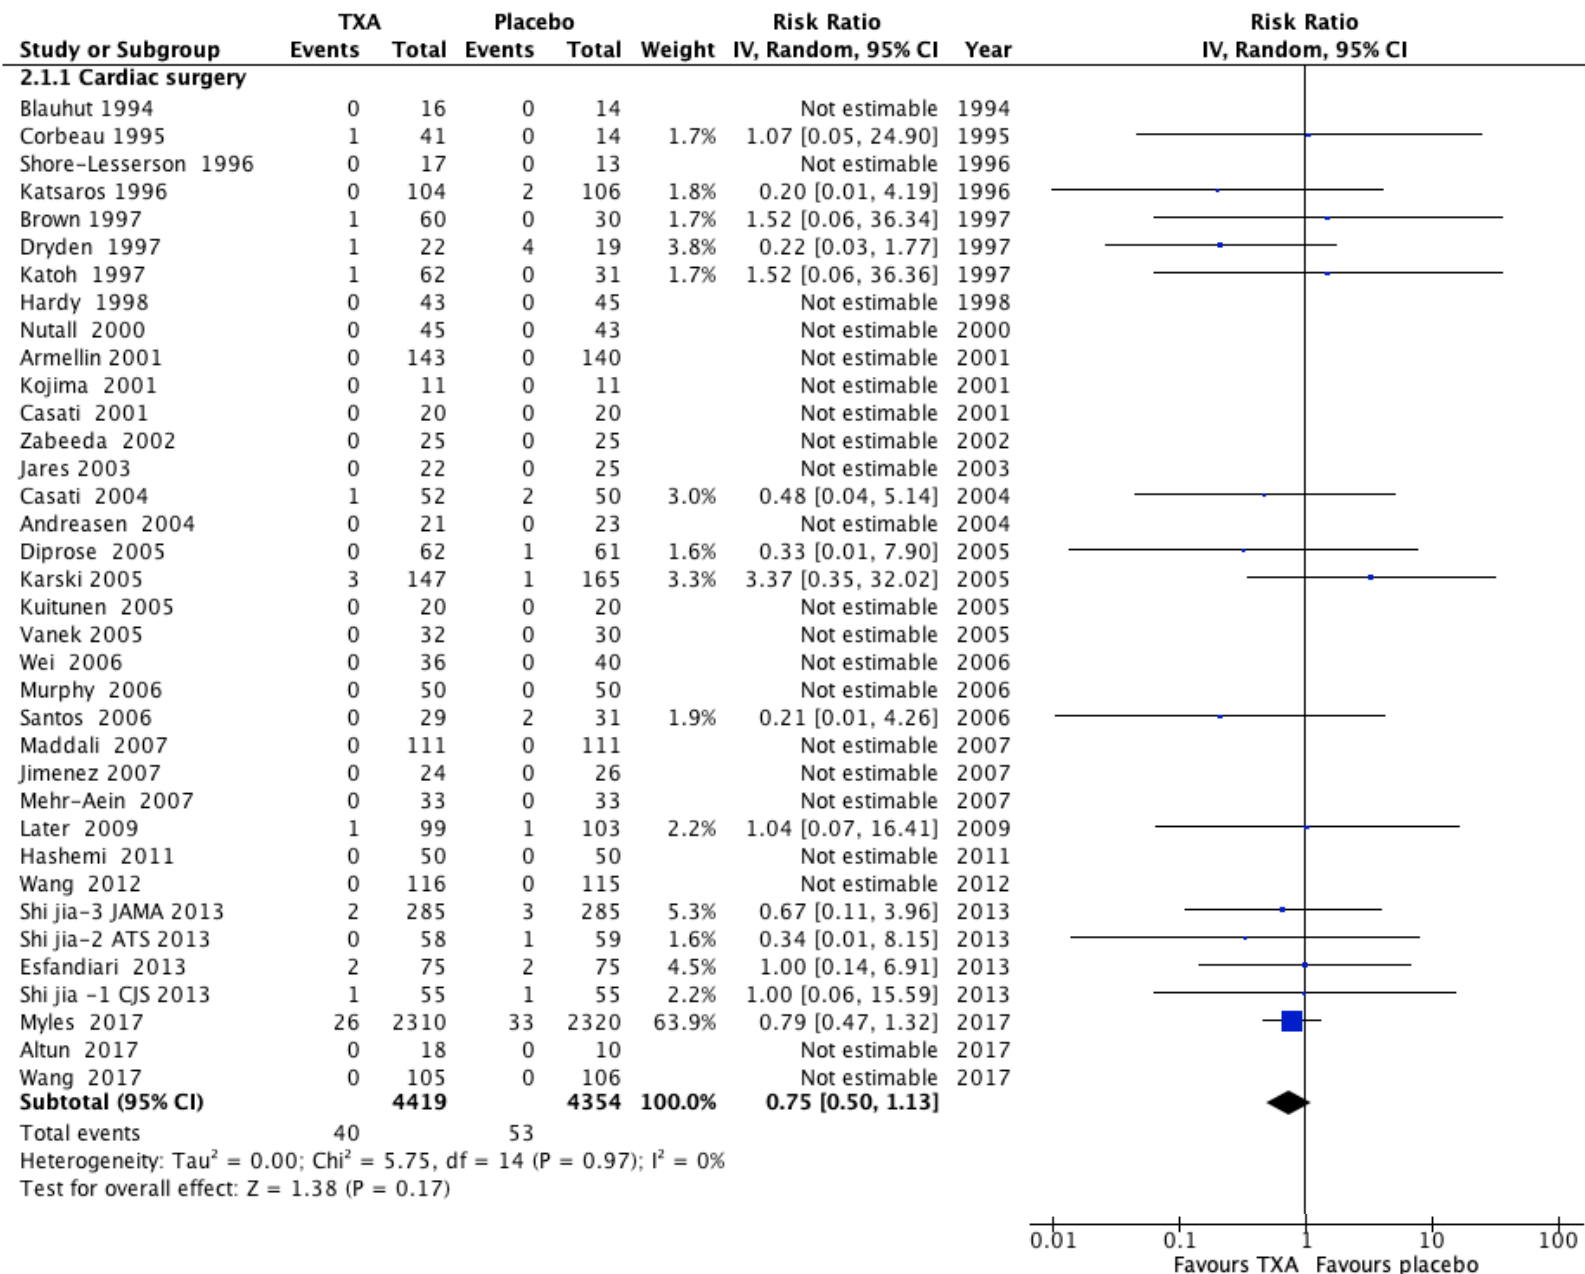

## TXA in non-massively bleeding critically ill patients

### 1b. Mortality - obstetrical bleeding

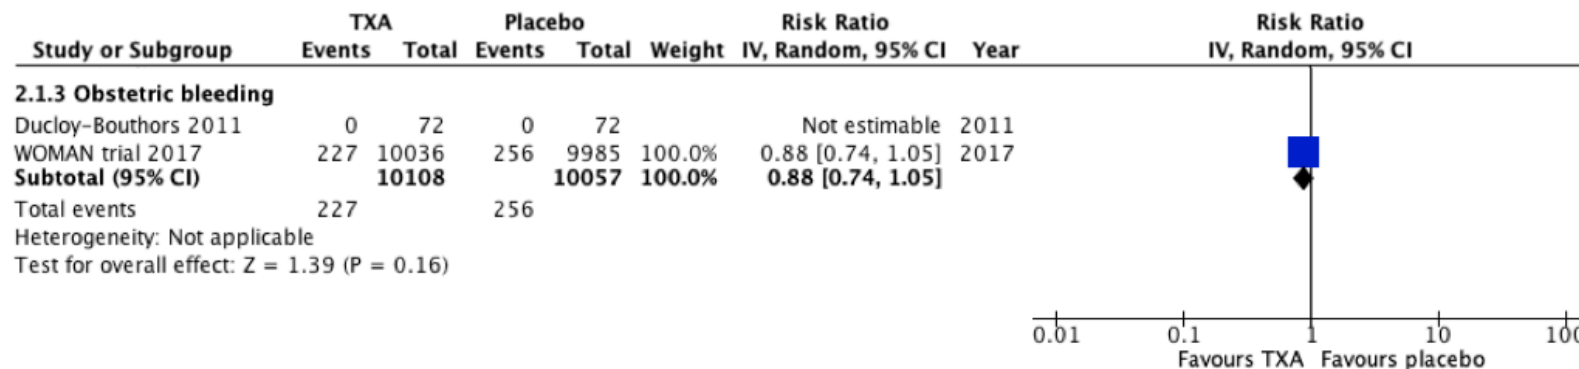

### 1c. Mortality - Subarachnoid hemorrhage and non-traumatic ICH

#### 2.1.4 Subarachnoid hemorrhage

|                          |     |             |     |             |               |                          |      |
|--------------------------|-----|-------------|-----|-------------|---------------|--------------------------|------|
| van Rossum 1977          | 15  | 26          | 11  | 25          | 6.0%          | 1.31 [0.76, 2.28]        | 1977 |
| Chandra 1978             | 1   | 20          | 5   | 19          | 0.5%          | 0.19 [0.02, 1.48]        | 1978 |
| Maurice 1978             | 5   | 38          | 13  | 41          | 2.2%          | 0.41 [0.16, 1.05]        | 1978 |
| Kaste 1979               | 4   | 32          | 4   | 32          | 1.1%          | 1.00 [0.27, 3.66]        | 1979 |
| Fodstad 1981             | 11  | 30          | 9   | 29          | 3.6%          | 1.18 [0.58, 2.42]        | 1981 |
| Vermeulen 1984           | 82  | 241         | 89  | 238         | 24.2%         | 0.91 [0.72, 1.16]        | 1984 |
| Tsementzis 1990          | 19  | 50          | 14  | 50          | 5.7%          | 1.36 [0.77, 2.40]        | 1990 |
| Roos 2000                | 76  | 229         | 75  | 233         | 21.4%         | 1.03 [0.79, 1.34]        | 2000 |
| Hillman 2002             | 27  | 254         | 32  | 251         | 7.7%          | 0.83 [0.52, 1.35]        | 2002 |
| Post 2020                | 128 | 480         | 114 | 475         | 27.7%         | 1.11 [0.89, 1.38]        | 2020 |
| <b>Subtotal (95% CI)</b> |     | <b>1400</b> |     | <b>1393</b> | <b>100.0%</b> | <b>1.01 [0.88, 1.16]</b> |      |

Total events 368 366  
Heterogeneity: Tau<sup>2</sup> = 0.01; Chi<sup>2</sup> = 10.21, df = 9 (P = 0.33); I<sup>2</sup> = 12%  
Test for overall effect: Z = 0.16 (P = 0.87)

#### 2.1.5 Non-traumatic ICH

|                          |     |             |     |             |               |                          |      |
|--------------------------|-----|-------------|-----|-------------|---------------|--------------------------|------|
| Sprigg 2014              | 3   | 16          | 2   | 8           | 0.9%          | 0.75 [0.16, 3.62]        | 2014 |
| Sprigg 2018              | 250 | 1161        | 249 | 1164        | 95.4%         | 1.01 [0.86, 1.18]        | 2018 |
| Meretoja 2020            | 13  | 50          | 8   | 50          | 3.7%          | 1.63 [0.74, 3.58]        | 2020 |
| <b>Subtotal (95% CI)</b> |     | <b>1227</b> |     | <b>1222</b> | <b>100.0%</b> | <b>1.02 [0.88, 1.19]</b> |      |

Total events 266 259  
Heterogeneity: Tau<sup>2</sup> = 0.00; Chi<sup>2</sup> = 1.51, df = 2 (P = 0.47); I<sup>2</sup> = 0%  
Test for overall effect: Z = 0.28 (P = 0.78)

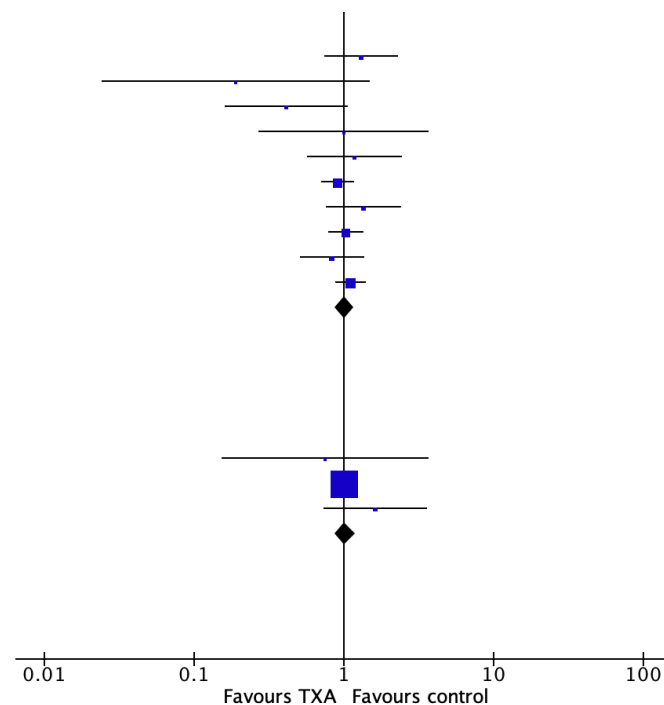

## TXA in non-massively bleeding critically ill patients

### 2a. Poor functional outcome

| Study or Subgroup                    | TXA    |             | Control |             | Weight        | Risk Ratio<br>M-H, Random, 95% CI | Year |
|--------------------------------------|--------|-------------|---------|-------------|---------------|-----------------------------------|------|
|                                      | Events | Total       | Events  | Total       |               |                                   |      |
| <b>2.3.1 Subarachnoid hemorrhage</b> |        |             |         |             |               |                                   |      |
| Vermeulen 1984                       | 114    | 241         | 112     | 238         | 25.1%         | 1.01 [0.83, 1.21]                 | 1984 |
| Tsementzis 1990                      | 23     | 50          | 20      | 50          | 4.4%          | 1.15 [0.73, 1.81]                 | 1990 |
| Roos 2000                            | 114    | 229         | 105     | 233         | 24.4%         | 1.10 [0.91, 1.34]                 | 2000 |
| Hillman 2002                         | 64     | 254         | 74      | 251         | 11.1%         | 0.85 [0.64, 1.14]                 | 2002 |
| Post 2020                            | 193    | 480         | 175     | 475         | 35.0%         | 1.09 [0.93, 1.28]                 | 2020 |
| <b>Subtotal (95% CI)</b>             |        | <b>1254</b> |         | <b>1247</b> | <b>100.0%</b> | <b>1.05 [0.95, 1.15]</b>          |      |

Total events

508

486

Heterogeneity:  $\text{Tau}^2 = 0.00$ ;  $\text{Chi}^2 = 2.85$ ,  $\text{df} = 4$  ( $P = 0.58$ );  $I^2 = 0\%$

Test for overall effect:  $Z = 0.93$  ( $P = 0.35$ )

#### 2.3.2 Non-traumatic ICH

|                          |     |             |     |             |               |                          |      |
|--------------------------|-----|-------------|-----|-------------|---------------|--------------------------|------|
| Sprigg 2018              | 814 | 1161        | 826 | 1164        | 98.3%         | 0.99 [0.94, 1.04]        | 2018 |
| Meretoja 2020            | 22  | 50          | 27  | 50          | 1.7%          | 0.81 [0.54, 1.22]        | 2020 |
| <b>Subtotal (95% CI)</b> |     | <b>1211</b> |     | <b>1214</b> | <b>100.0%</b> | <b>0.98 [0.93, 1.04]</b> |      |

Total events

836

853

Heterogeneity:  $\text{Tau}^2 = 0.00$ ;  $\text{Chi}^2 = 0.87$ ,  $\text{df} = 1$  ( $P = 0.35$ );  $I^2 = 0\%$

Test for overall effect:  $Z = 0.57$  ( $P = 0.57$ )

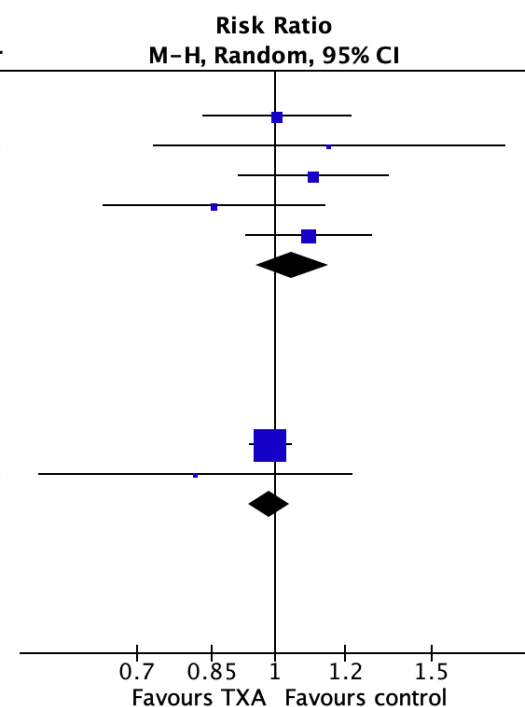

### 2b. Quality of life

#### Obstetric bleeding:

Woman Trial - EQ5D values were similar between two groups (not reported)

#### Non-traumatic ICH:

TICH trial: Euro QoL visual analogue scale: 66.3 (17.0) in TXA vs. 73.3 (15.3) in control ( $p=0.28$ ).

TICH-2 trial: EQ5D scores were identical between groups 0.34 (0.4)

# TXA in non-massively bleeding critically ill patients

## 3a. Bleeding - cardiac surgery

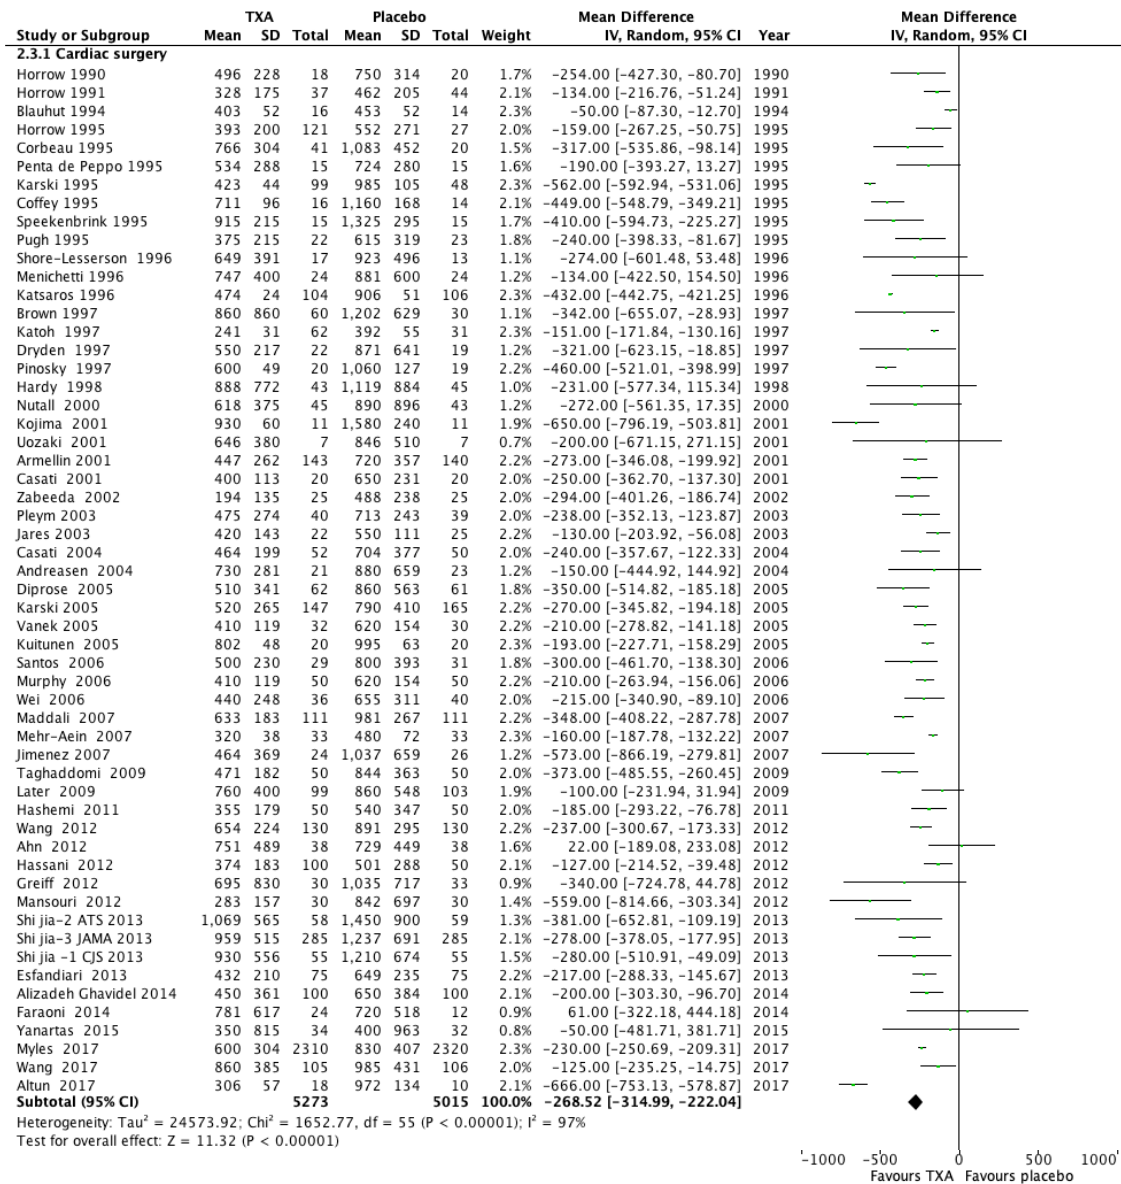



## TXA in non-massively bleeding critically ill patients

### 3b. Rebleeding events

#### 2.9.2 Subarachnoid hemorrhage

|                          |             |     |             |               |       |                          |      |
|--------------------------|-------------|-----|-------------|---------------|-------|--------------------------|------|
| van Rossum 1977          | 5           | 26  | 4           | 25            | 4.9%  | 1.20 [0.36, 3.97]        | 1977 |
| Fodstad 1978             | 6           | 30  | 7           | 29            | 6.8%  | 0.83 [0.32, 2.17]        | 1978 |
| Maurice 1978             | 6           | 38  | 14          | 41            | 8.2%  | 0.46 [0.20, 1.08]        | 1978 |
| Chandra 1978             | 1           | 20  | 4           | 19            | 1.8%  | 0.24 [0.03, 1.94]        | 1978 |
| Kaste 1979               | 7           | 32  | 6           | 32            | 6.7%  | 1.17 [0.44, 3.09]        | 1979 |
| Vermeulen 1984           | 21          | 241 | 56          | 238           | 15.3% | 0.37 [0.23, 0.59]        | 1984 |
| Tsementzis 1990          | 12          | 50  | 12          | 50            | 10.4% | 1.00 [0.50, 2.01]        | 1990 |
| Roos 2000                | 44          | 229 | 77          | 233           | 19.2% | 0.58 [0.42, 0.80]        | 2000 |
| Hillman 2002             | 6           | 254 | 27          | 251           | 7.9%  | 0.22 [0.09, 0.52]        | 2002 |
| Post 2020                | 49          | 480 | 66          | 475           | 18.5% | 0.73 [0.52, 1.04]        | 2020 |
| <b>Subtotal (95% CI)</b> | <b>1400</b> |     | <b>1393</b> | <b>100.0%</b> |       | <b>0.60 [0.44, 0.80]</b> |      |

Total events

157                      273

Heterogeneity:  $\tau^2 = 0.09$ ;  $\chi^2 = 17.43$ ,  $df = 9$  ( $P = 0.04$ );  $I^2 = 48\%$

Test for overall effect:  $Z = 3.42$  ( $P = 0.0006$ )

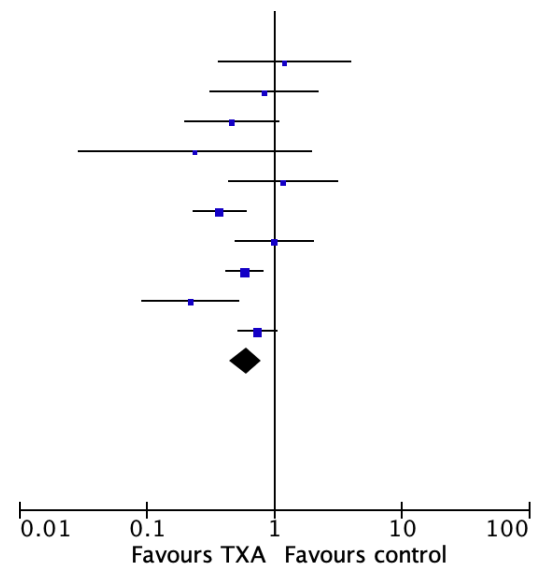

## TXA in non-massively bleeding critically ill patients

### 3c. Need for surgical intervention

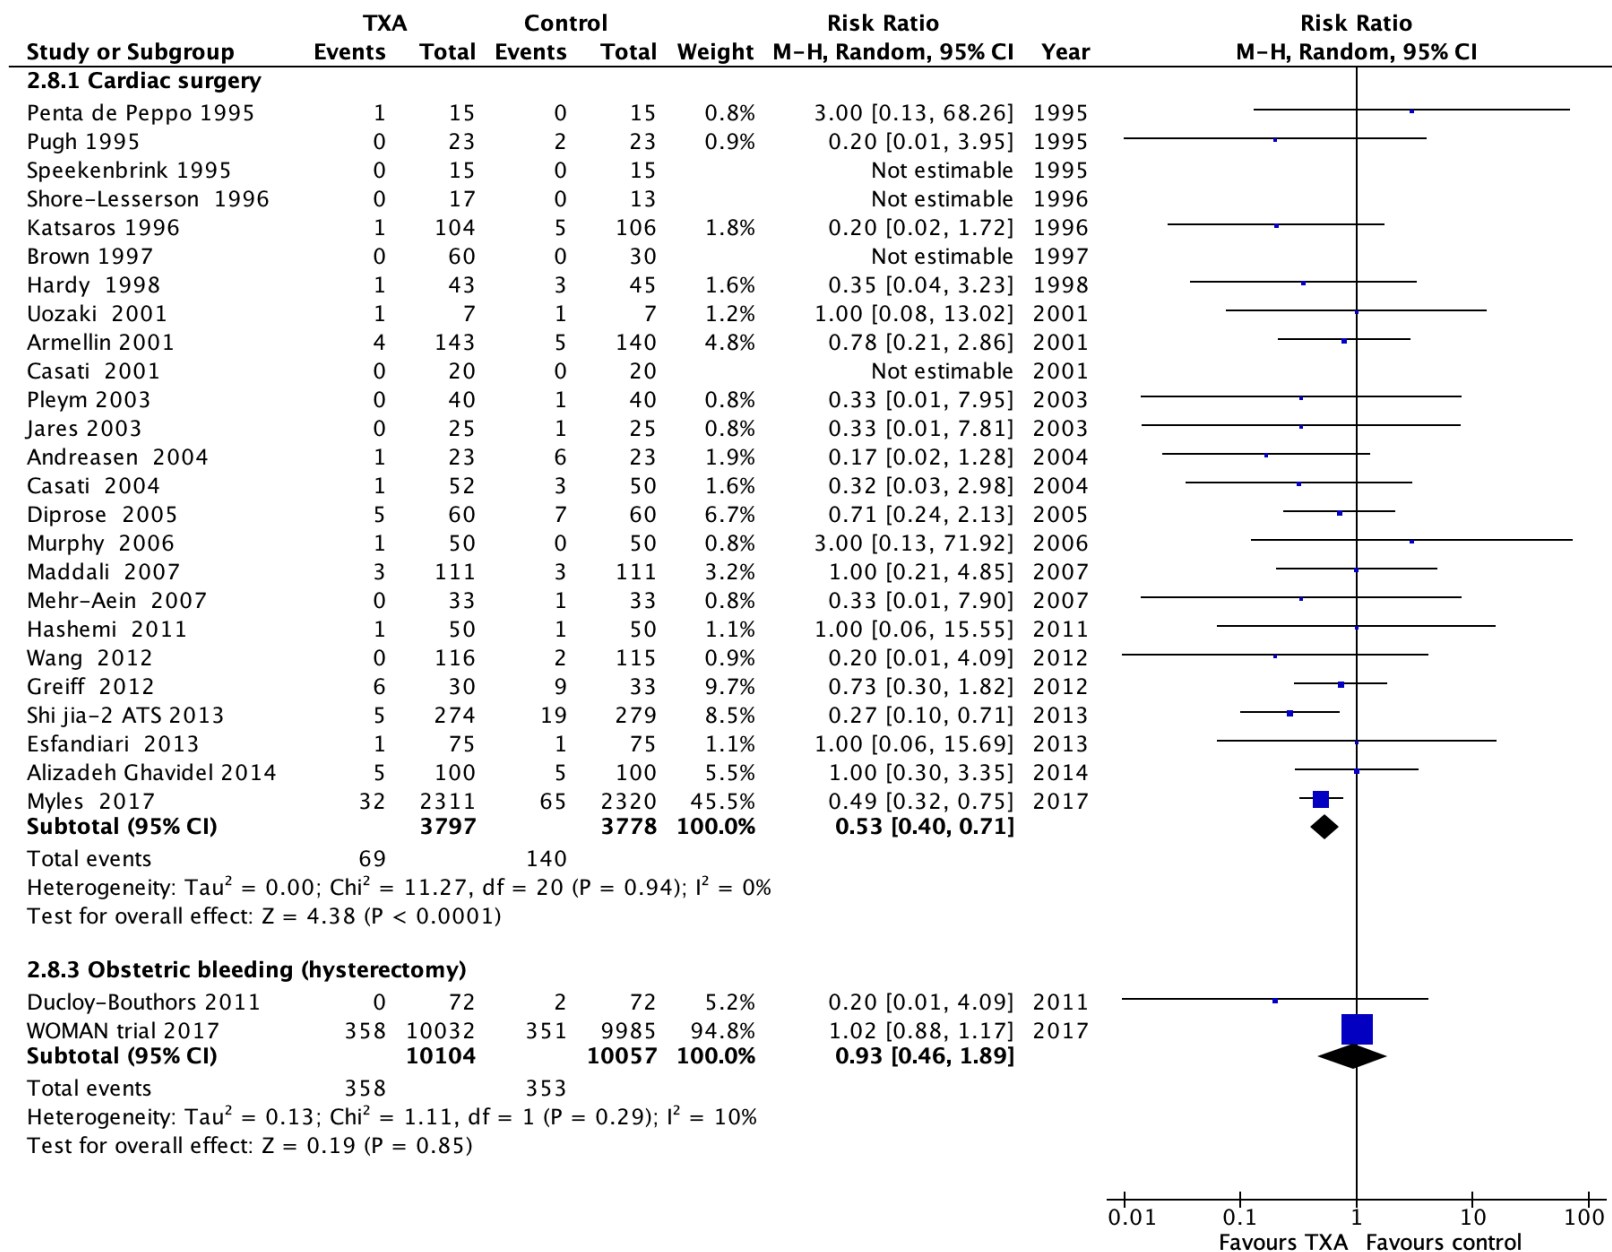

# TXA in non-massively bleeding critically ill patients

## 4. Stroke

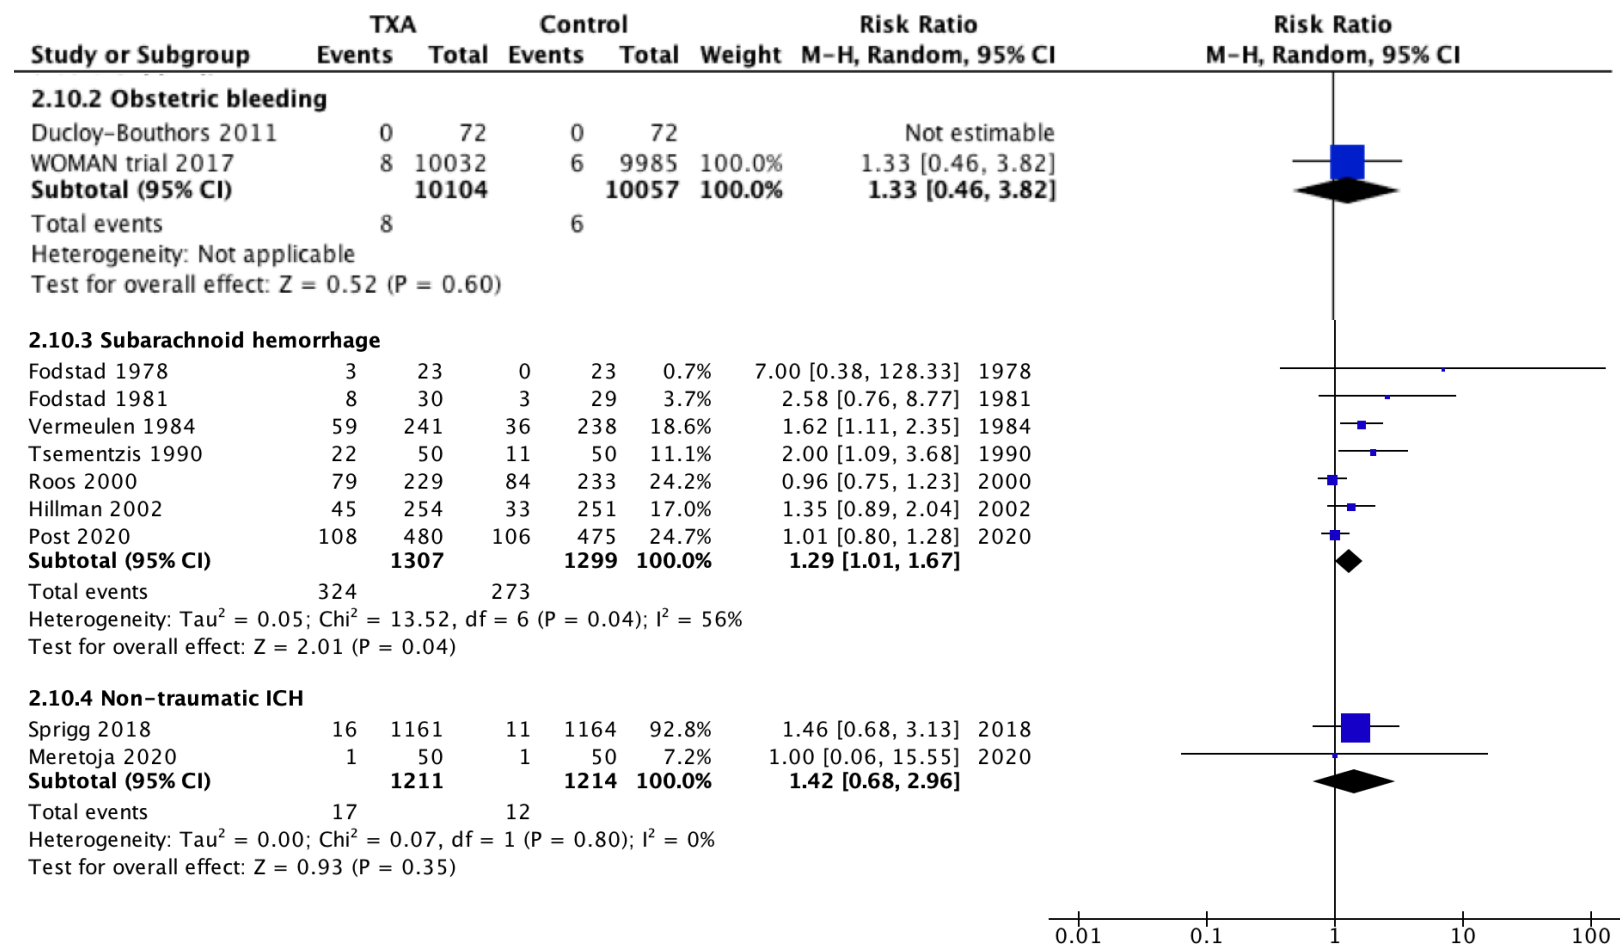

## TXA in non-massively bleeding critically ill patients

### 5. Myocardial infarction

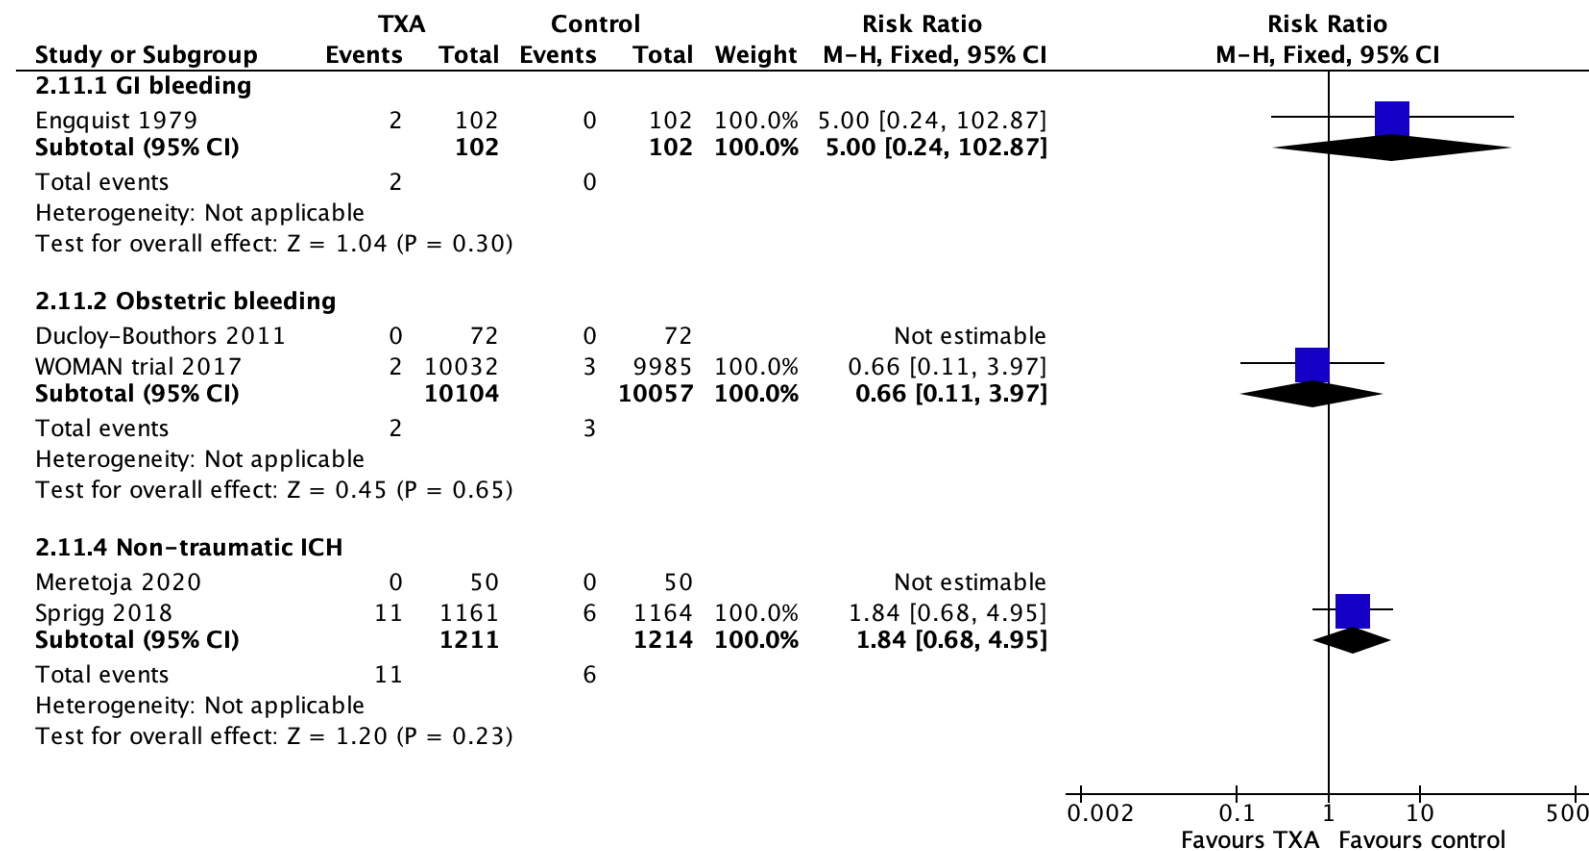

## TXA in non-massively bleeding critically ill patients

### 6a. Thrombosis — DVT

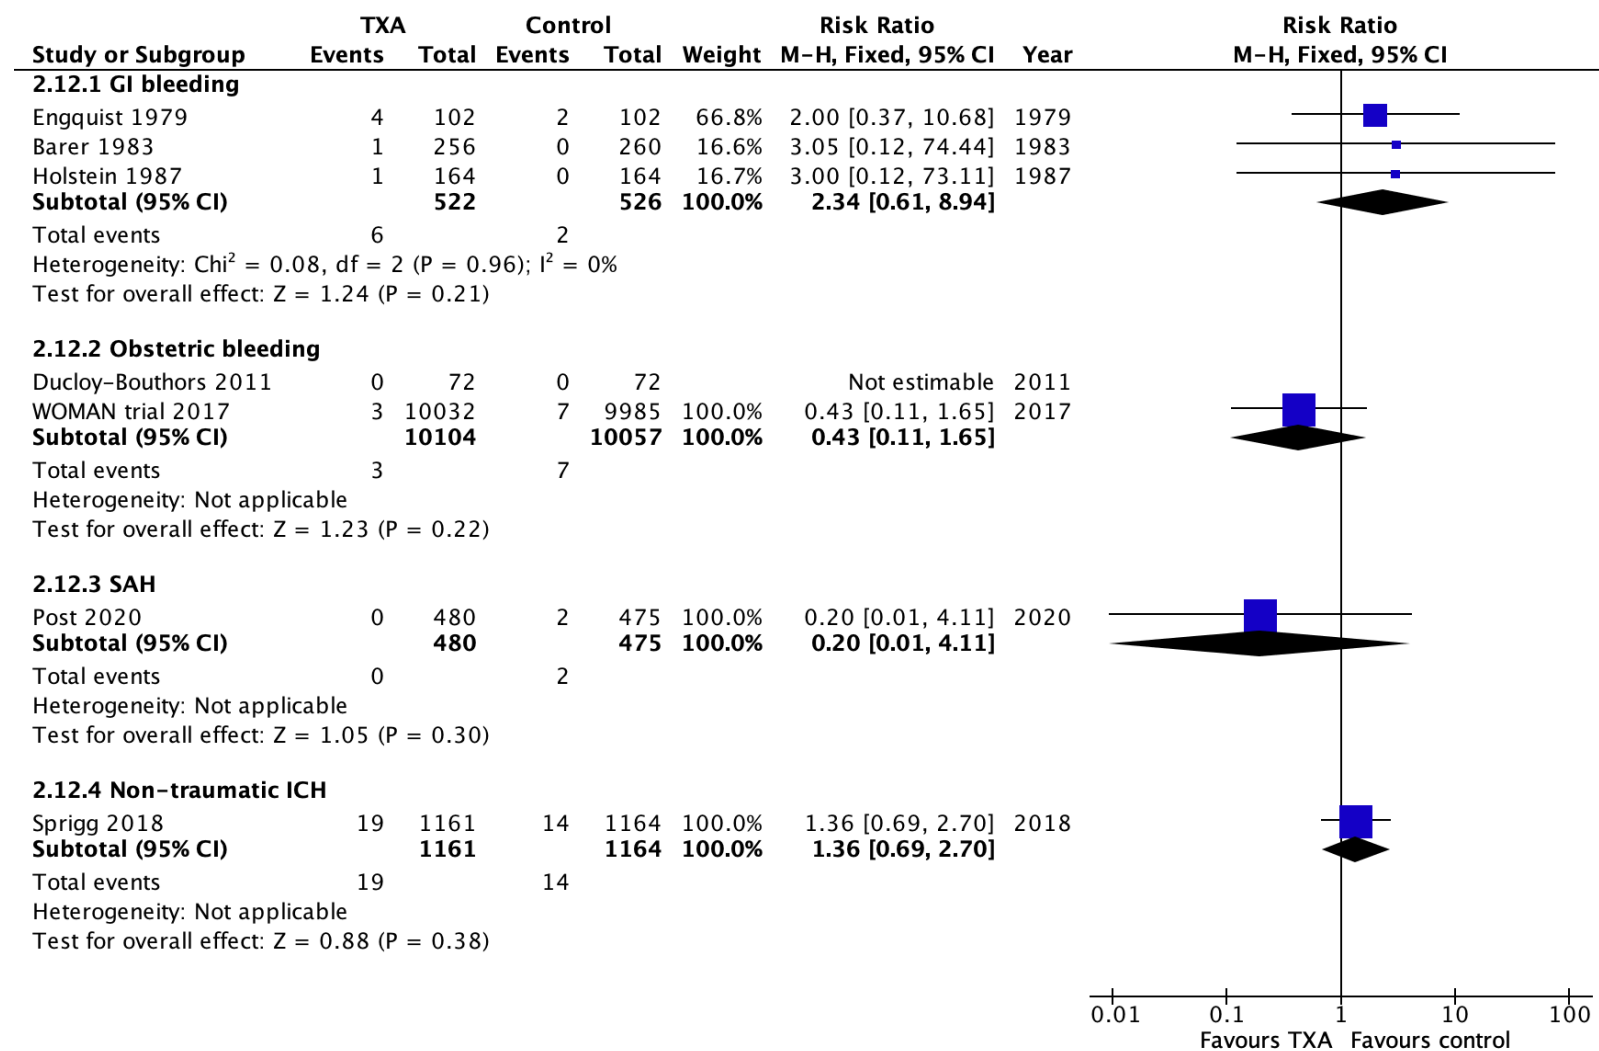

## TXA in non-massively bleeding critically ill patients

### 6b. Thrombosis - pulmonary embolism

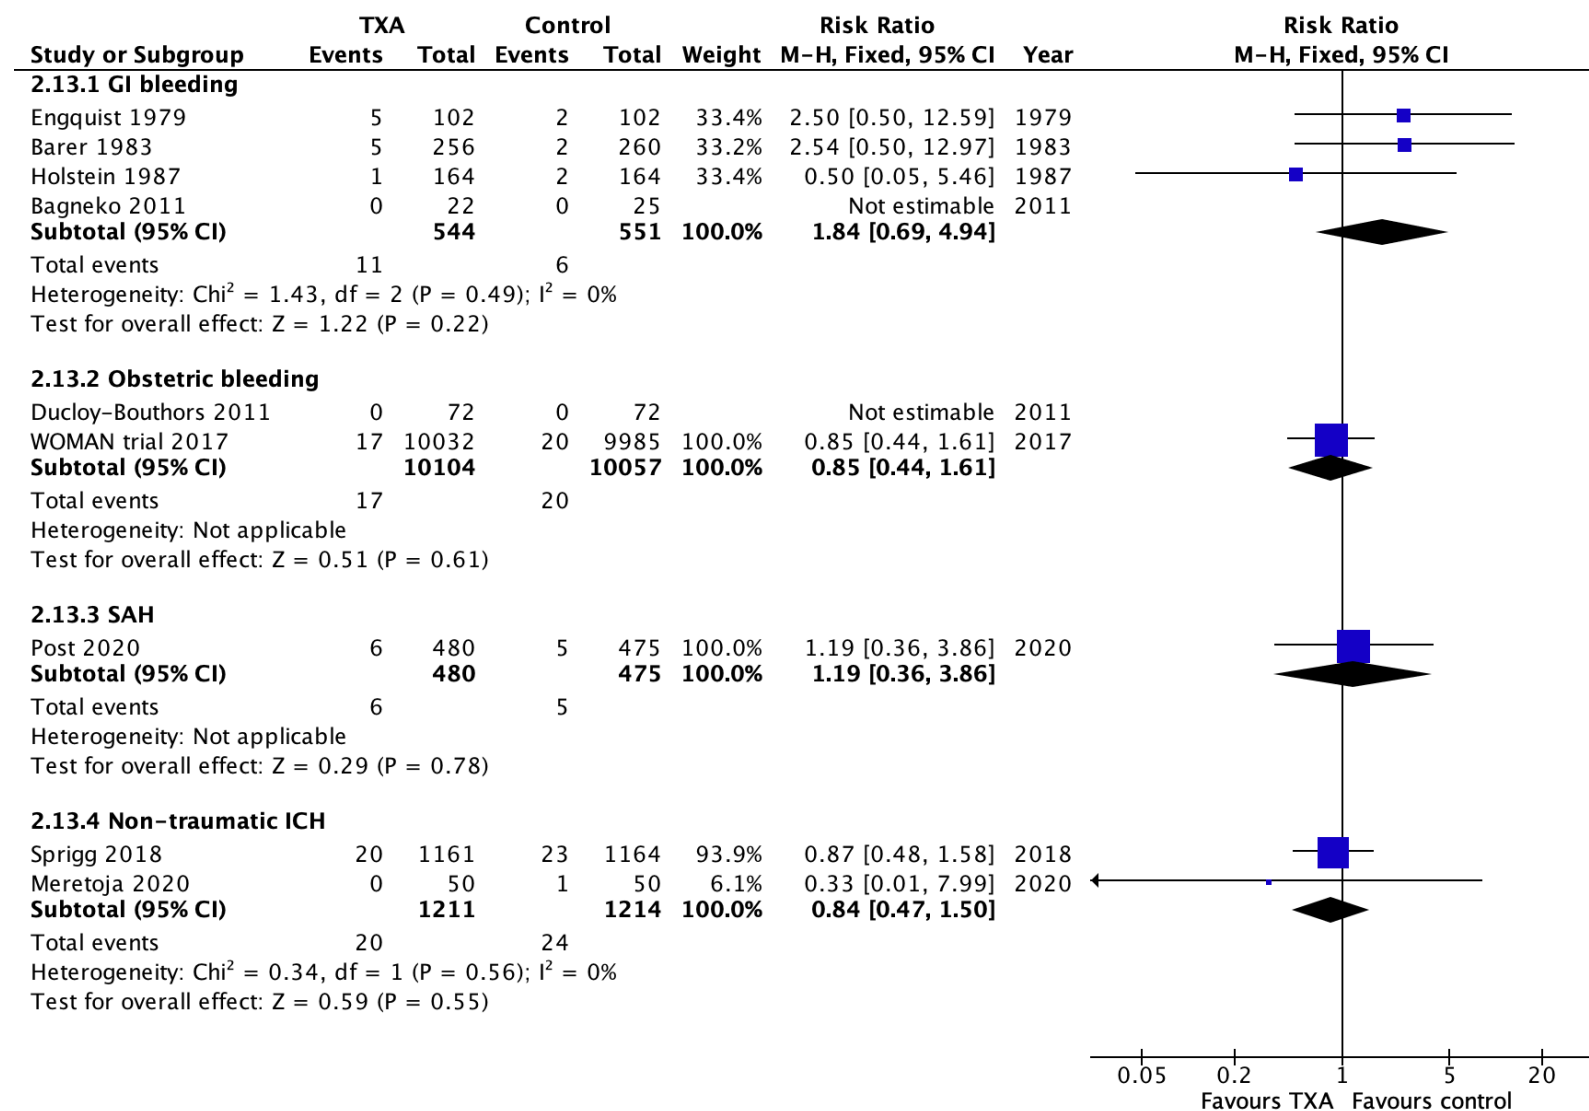

## TXA in non-massively bleeding critically ill patients

### 6c. Thrombosis - venous thrombosis not otherwise specified or combined DVT/PE

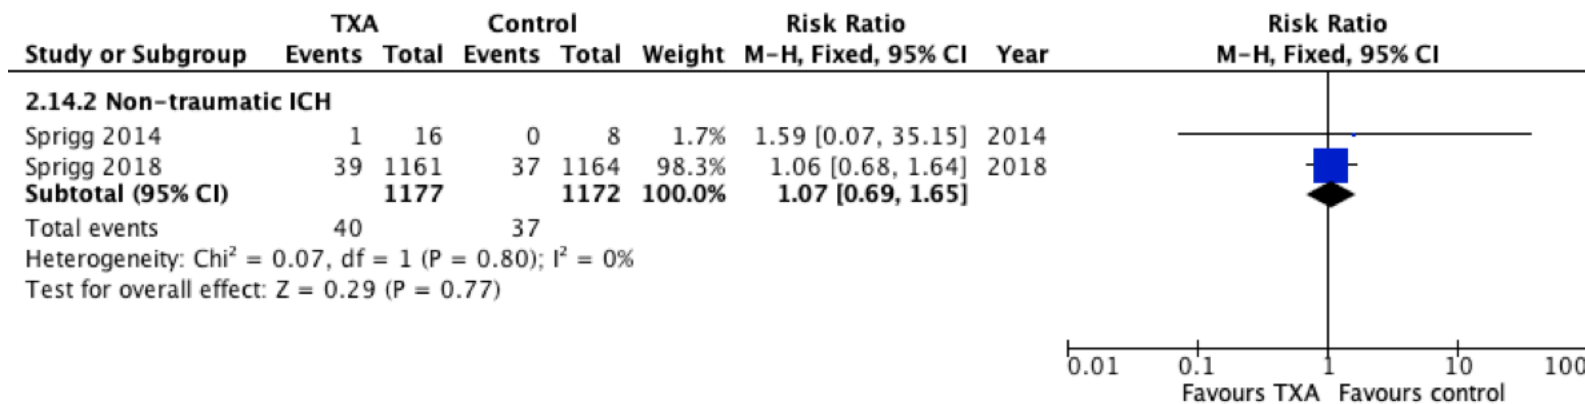

## TXA in non-massively bleeding critically ill patients

### 7. Seizure

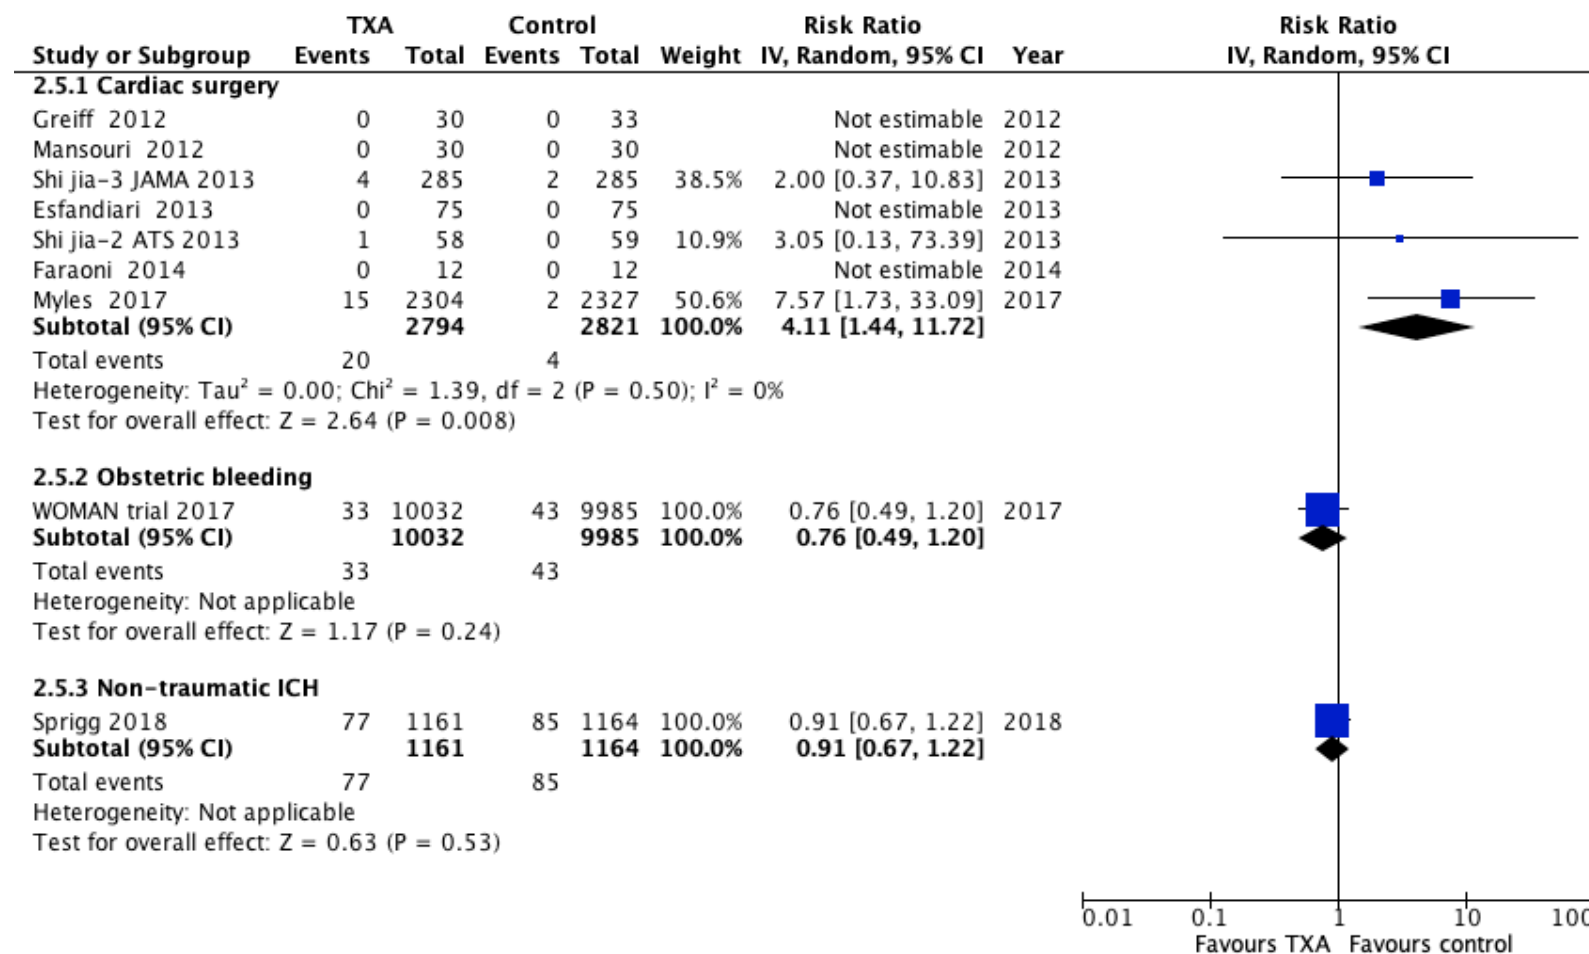



# TXA in non-massively bleeding critically ill patients

## 8. Need for RBC transfusion

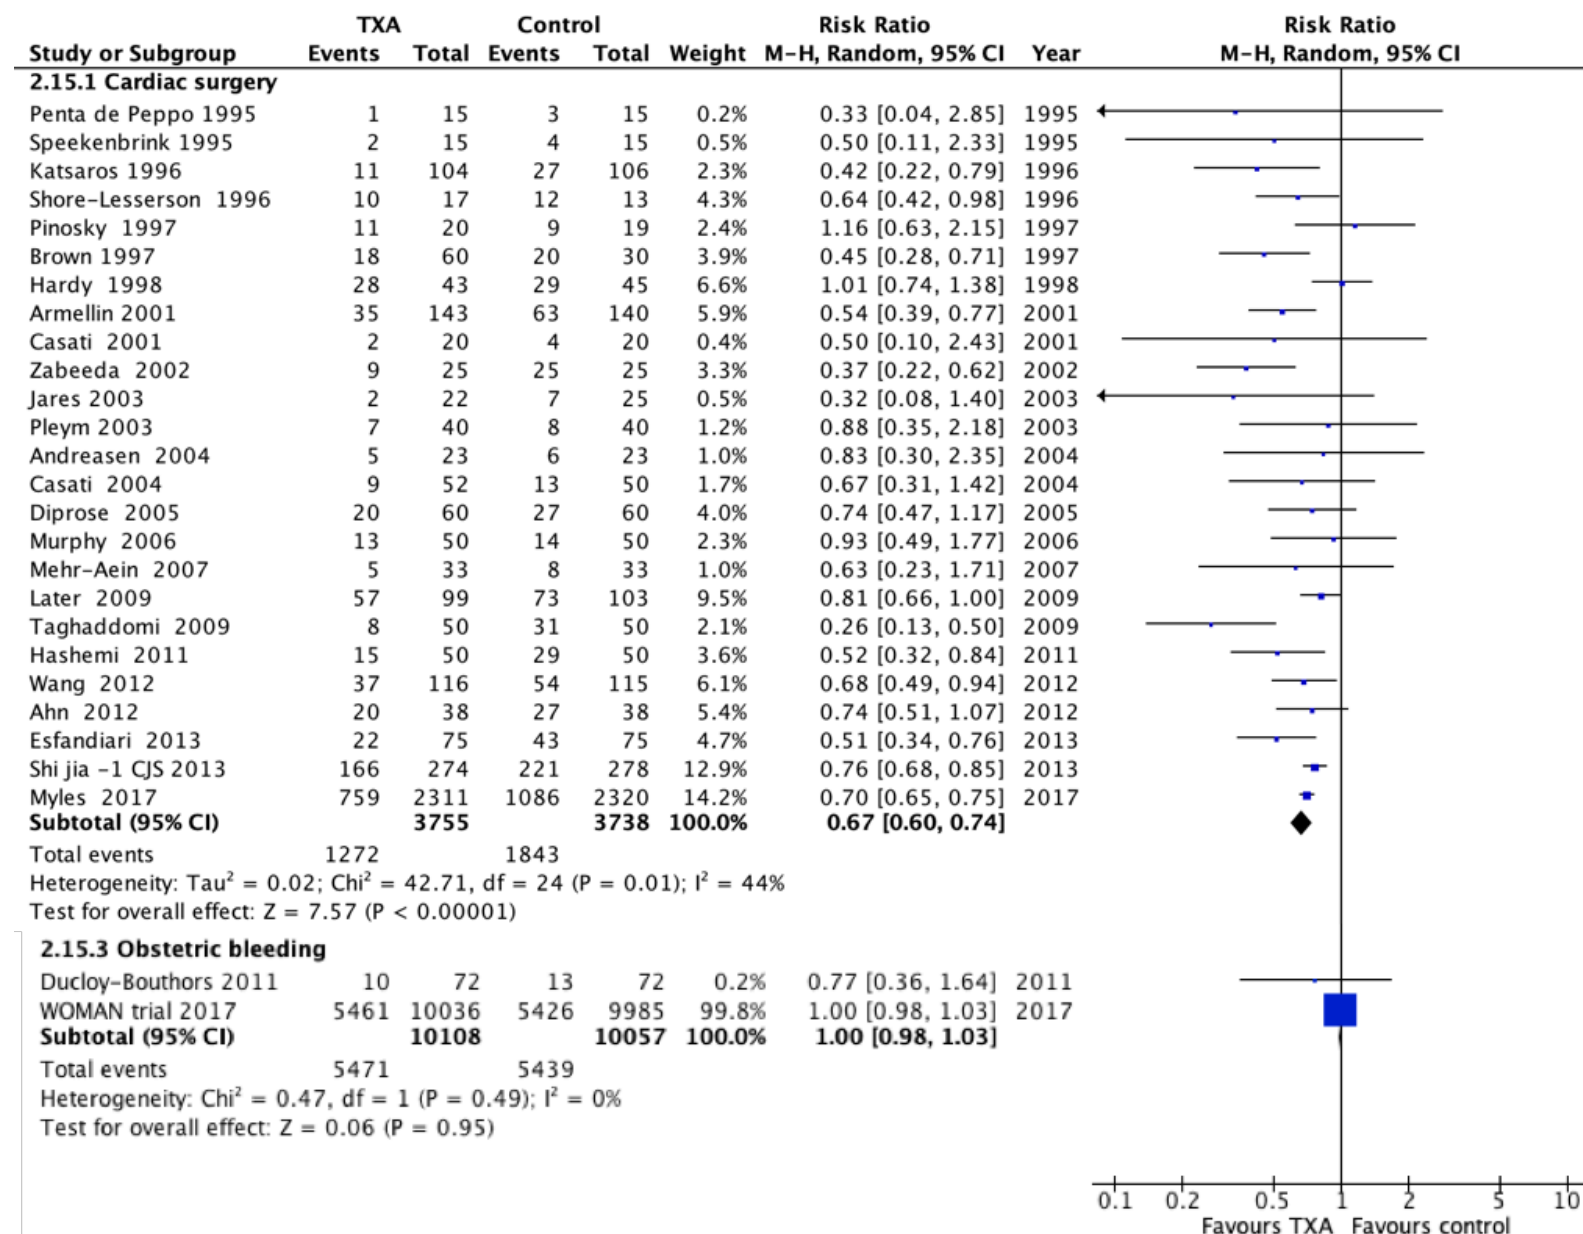

## TXA in non-massively bleeding critically ill patients

### 9. Hospital length of stay

| Study or Subgroup               | TXA   |      |             | Control |      |             | Weight        | Mean Difference<br>IV, Fixed, 95% CI |
|---------------------------------|-------|------|-------------|---------|------|-------------|---------------|--------------------------------------|
|                                 | Mean  | SD   | Total       | Mean    | SD   | Total       |               |                                      |
| <b>2.16.1 Non-traumatic ICH</b> |       |      |             |         |      |             |               |                                      |
| Sprigg 2014                     | 19.4  | 24.5 | 16          | 10.8    | 14   | 8           | 5.9%          | 8.60 [-6.83, 24.03]                  |
| Sprigg 2018                     | 63.12 | 47.1 | 1161        | 63.73   | 48.1 | 1164        | 94.1%         | -0.61 [-4.48, 3.26]                  |
| <b>Subtotal (95% CI)</b>        |       |      | <b>1177</b> |         |      | <b>1172</b> | <b>100.0%</b> | <b>-0.07 [-3.82, 3.69]</b>           |

Heterogeneity:  $\text{Chi}^2 = 1.29$ ,  $\text{df} = 1$  ( $P = 0.26$ );  $I^2 = 22\%$

Test for overall effect:  $Z = 0.03$  ( $P = 0.97$ )

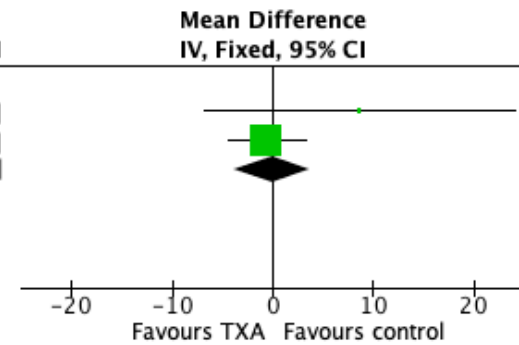

**Evidence Summary 12: Tranexamic acid in critically ill patients with gastrointestinal bleeding**

## TXA in patients with GI bleeding

### 1. High-dose IV TXA

| Certainty assessment                                     |              |                          |              |                          |                      | № of patients   |                 | Effect                           |                                                       | Certainty    | Importance |
|----------------------------------------------------------|--------------|--------------------------|--------------|--------------------------|----------------------|-----------------|-----------------|----------------------------------|-------------------------------------------------------|--------------|------------|
| № of studies                                             | Risk of bias | Inconsistency            | Indirectness | Imprecision              | Other considerations | TXA             | no TXA          | Relative (95% CI)                | Absolute (95% CI)                                     |              |            |
| <b>Mortality at longest follow-up - High-dose IV TXA</b> |              |                          |              |                          |                      |                 |                 |                                  |                                                       |              |            |
| 5 RCTs                                                   | not serious  | not serious <sup>a</sup> | not serious  | not serious              | none                 | 602/6593 (9.1%) | 617/6626 (9.3%) | <b>RR 0.98</b><br>(0.88 to 1.09) | <b>2 fewer per 1,000</b><br>(from 11 fewer to 8 more) | ⊕⊕⊕⊕<br>HIGH | CRITICAL   |
| <b>Stroke - High-dose IV TXA</b>                         |              |                          |              |                          |                      |                 |                 |                                  |                                                       |              |            |
| 4 RCTs                                                   | not serious  | not serious              | not serious  | not serious <sup>b</sup> | none                 | 20/6474 (0.3%)  | 22/6503 (0.3%)  | <b>RR 0.92</b><br>(0.51 to 1.65) | <b>0 fewer per 1,000</b><br>(from 2 fewer to 2 more)  | ⊕⊕⊕⊕<br>HIGH | CRITICAL   |
| <b>Myocardial infarction - High-dose IV TXA</b>          |              |                          |              |                          |                      |                 |                 |                                  |                                                       |              |            |
| 2 RCTs                                                   | not serious  | not serious              | not serious  | not serious <sup>b</sup> | none                 | 26/6054 (0.4%)  | 28/6079 (0.5%)  | <b>RR 0.93</b><br>(0.55 to 1.58) | <b>0 fewer per 1,000</b><br>(from 2 fewer to 3 more)  | ⊕⊕⊕⊕<br>HIGH | CRITICAL   |
| <b>Rebleeding - High-dose IV TXA</b>                     |              |                          |              |                          |                      |                 |                 |                                  |                                                       |              |            |
| 4 RCTs                                                   | not serious  | not serious              | not serious  | not serious <sup>b</sup> | none                 | 503/6611 (7.6%) | 548/6645 (8.2%) | <b>RR 0.92</b><br>(0.82 to 1.04) | <b>7 fewer per 1,000</b><br>(from 15 fewer to 3 more) | ⊕⊕⊕⊕<br>HIGH | IMPORTANT  |
| <b>Surgical intervention - High-dose IV TXA</b>          |              |                          |              |                          |                      |                 |                 |                                  |                                                       |              |            |
| 5 RCTs                                                   | not serious  | not serious <sup>c</sup> | not serious  | not serious <sup>b</sup> | none                 | 210/6613 (3.2%) | 233/6642 (3.5%) | <b>RR 0.91</b><br>(0.76 to 1.09) | <b>3 fewer per 1,000</b><br>(from 8 fewer to 3 more)  | ⊕⊕⊕⊕<br>HIGH | IMPORTANT  |
| <b>Seizure - High-dose IV TXA</b>                        |              |                          |              |                          |                      |                 |                 |                                  |                                                       |              |            |
| 1 RCT                                                    | not serious  | not serious              | not serious  | not serious              | none                 | 38/5952 (0.6%)  | 22/5977 (0.4%)  | <b>RR 1.73</b><br>(1.03 to 2.93) | <b>3 more per 1,000</b><br>(from 0 fewer to 7 more)   | ⊕⊕⊕⊕<br>HIGH | IMPORTANT  |
| <b>Sepsis - High-dose IV TXA</b>                         |              |                          |              |                          |                      |                 |                 |                                  |                                                       |              |            |
| 1 RCT                                                    | not serious  | not serious              | not serious  | not serious <sup>b</sup> | none                 | 210/5952 (3.5%) | 216/5977 (3.6%) | <b>RR 0.98</b><br>(0.81 to 1.18) | <b>1 fewer per 1,000</b><br>(from 7 fewer to 7 more)  | ⊕⊕⊕⊕<br>HIGH | CRITICAL   |

## TXA in patients with GI bleeding

|                                                  |             |             |             |                          |      |                          |                       |                                  |                                                        |              |           |
|--------------------------------------------------|-------------|-------------|-------------|--------------------------|------|--------------------------|-----------------------|----------------------------------|--------------------------------------------------------|--------------|-----------|
| <b>Renal failure - High-dose IV TXA</b>          |             |             |             |                          |      |                          |                       |                                  |                                                        |              |           |
| 1 RCT                                            | not serious | not serious | not serious | not serious <sup>b</sup> | none | 142/5951<br>(2.4%)       | 157/5978<br>(2.6%)    | <b>RR 0.91</b><br>(0.73 to 1.14) | <b>2 fewer per 1,000</b><br>(from 7 fewer to 4 more)   | ⊕⊕⊕⊕<br>HIGH | IMPORTANT |
| <b>Deep venous thrombosis - High-dose IV TXA</b> |             |             |             |                          |      |                          |                       |                                  |                                                        |              |           |
| 4 RCTs                                           | not serious | not serious | not serious | not serious              | none | 29/6474<br>(0.4%)        | 14/6503<br>(0.2%)     | <b>RR 2.01</b><br>(1.08 to 3.72) | <b>2 more per 1,000</b><br>(from 0 fewer to 6 more)    | ⊕⊕⊕⊕<br>HIGH | IMPORTANT |
| <b>Pulmonary embolism - High-dose IV TXA</b>     |             |             |             |                          |      |                          |                       |                                  |                                                        |              |           |
| 5 RCTs                                           | not serious | not serious | not serious | not serious              | none | 39/6496<br>(0.6%)        | 22/6528<br>(0.3%)     | <b>RR 1.78</b><br>(1.06 to 3.00) | <b>3 more per 1,000</b><br>(from 0 fewer to 7 more)    | ⊕⊕⊕⊕<br>HIGH | IMPORTANT |
| <b>RBC transfusion - High-dose IV TXA</b>        |             |             |             |                          |      |                          |                       |                                  |                                                        |              |           |
| 3 RCTs                                           | not serious | not serious | not serious | not serious <sup>b</sup> | none | 4033/437<br>3<br>(92.2%) | 4073/443<br>1 (91.9%) | <b>RR 1.00</b><br>(0.99 to 1.01) | <b>0 fewer per 1,000</b><br>(from 9 fewer to 9 more)   | ⊕⊕⊕⊕<br>HIGH | IMPORTANT |
| <b>Plasma transfusion - High-dose IV TXA</b>     |             |             |             |                          |      |                          |                       |                                  |                                                        |              |           |
| 1 RCT                                            | not serious | not serious | not serious | not serious <sup>b</sup> | none | 910/4076<br>(22.3%)      | 993/4129<br>(24.0%)   | <b>RR 0.93</b><br>(0.86 to 1.01) | <b>17 fewer per 1,000</b><br>(from 34 fewer to 2 more) | ⊕⊕⊕⊕<br>HIGH | IMPORTANT |
| <b>Platelet transfusion - High-dose IV TXA</b>   |             |             |             |                          |      |                          |                       |                                  |                                                        |              |           |
| 1 RCT                                            | not serious | not serious | not serious | not serious <sup>b</sup> | none | 219/4076<br>(5.4%)       | 255/4129<br>(6.2%)    | <b>RR 0.87</b><br>(0.73 to 1.04) | <b>8 fewer per 1,000</b><br>(from 17 fewer to 2 more)  | ⊕⊕⊕⊕<br>HIGH | IMPORTANT |
| <b>RBCs transfused - High-dose IV TXA</b>        |             |             |             |                          |      |                          |                       |                                  |                                                        |              |           |
| 1 RCT                                            | not serious | not serious | not serious | not serious <sup>b</sup> | none | 5953                     | 5978                  | -                                | <b>MD 0.1 lower</b><br>(0.19 lower to 0.01 lower)      | ⊕⊕⊕⊕<br>HIGH | IMPORTANT |
| <b>Plasma transfused - High-dose IV TXA</b>      |             |             |             |                          |      |                          |                       |                                  |                                                        |              |           |
| 1 RCT                                            | not serious | not serious | not serious | not serious <sup>b</sup> | none | 5953                     | 5978                  | -                                | <b>MD 0.1 lower</b><br>(0.19 lower to 0.01 lower)      | ⊕⊕⊕⊕<br>HIGH | IMPORTANT |
| <b>Platelets transfused - High-dose IV TXA</b>   |             |             |             |                          |      |                          |                       |                                  |                                                        |              |           |

## TXA in patients with GI bleeding

|       |             |             |             |                          |      |      |      |   |                                     |              |           |
|-------|-------------|-------------|-------------|--------------------------|------|------|------|---|-------------------------------------|--------------|-----------|
| 1 RCT | not serious | not serious | not serious | not serious <sup>b</sup> | none | 5953 | 5978 | - | MD 0<br>(0.03 lower to 0.03 higher) | ⊕⊕⊕⊕<br>HIGH | IMPORTANT |
|-------|-------------|-------------|-------------|--------------------------|------|------|------|---|-------------------------------------|--------------|-----------|

CI: Confidence interval; RR: Risk ratio; MD: Mean difference

### Explanations

- Although moderate statistical heterogeneity ( $I^2 > 60\%$ ), this is driven by a single older trial (Barer 1983); excluding this trial reduces heterogeneity but has as similar point estimate (RR 1.01, 95% CI 0.91, 1.13). The effect estimate is thus unlikely to be effected by statistical heterogeneity.
- Though the 95% confidence interval crosses 1, the absolute risk difference is small and possibly of minimal clinical significance.
- Although moderate statistical heterogeneity ( $I^2 > 60\%$ ), this is driven by a single older trial (Holstein 1987); excluding this trial results in a similar estimate of effect (RR 0.96, 95% CI 0.79, 1.15). The effect estimate is thus minimally impacted by the statistical heterogeneity.

## TXA in patients with GI bleeding

### 2. Low dose IV TXA or enteral TXA only

| Certainty assessment                                                 |              |               |              |                      |                      | № of patients   |                 | Effect                           |                                                           | Certainty        | Importance |
|----------------------------------------------------------------------|--------------|---------------|--------------|----------------------|----------------------|-----------------|-----------------|----------------------------------|-----------------------------------------------------------|------------------|------------|
| № of studies                                                         | Risk of bias | Inconsistency | Indirectness | Imprecision          | Other considerations | TXA             | no TXA          | Relative (95% CI)                | Absolute (95% CI)                                         |                  |            |
| <b>Mortality at longest follow-up - Low-dose or enteral TXA only</b> |              |               |              |                      |                      |                 |                 |                                  |                                                           |                  |            |
| 7 RCTs                                                               | not serious  | not serious   | not serious  | serious <sup>a</sup> | none                 | 19/445 (4.3%)   | 30/435 (6.9%)   | <b>RR 0.62</b><br>(0.36 to 1.09) | <b>26 fewer per 1,000</b><br>(from 44 fewer to 6 more)    | ⊕⊕⊕○<br>MODERATE | CRITICAL   |
| <b>Rebleeding - Low-dose or enteral TXA only</b>                     |              |               |              |                      |                      |                 |                 |                                  |                                                           |                  |            |
| 5 RCTs                                                               | not serious  | not serious   | not serious  | serious <sup>b</sup> | none                 | 30/371 (8.1%)   | 59/363 (16.3%)  | <b>RR 0.5</b><br>(0.33 to 0.75)  | <b>81 fewer per 1,000</b><br>(from 109 fewer to 41 fewer) | ⊕⊕⊕○<br>MODERATE | IMPORTANT  |
| <b>Surgical intervention - Low-dose or enteral TXA only</b>          |              |               |              |                      |                      |                 |                 |                                  |                                                           |                  |            |
| 5 RCTs                                                               | not serious  | not serious   | not serious  | serious <sup>b</sup> | none                 | 29/302 (9.6%)   | 49/297 (16.5%)  | <b>RR 0.58</b><br>(0.38 to 0.88) | <b>69 fewer per 1,000</b><br>(from 102 fewer to 20 fewer) | ⊕⊕⊕○<br>MODERATE | IMPORTANT  |
| <b>RBC transfusion - Low-dose or enteral TXA only</b>                |              |               |              |                      |                      |                 |                 |                                  |                                                           |                  |            |
| 4 RCTs                                                               | not serious  | not serious   | not serious  | serious <sup>a</sup> | none                 | 217/304 (71.4%) | 207/299 (69.2%) | <b>RR 1.03</b><br>(0.93 to 1.13) | <b>21 more per 1,000</b><br>(from 48 fewer to 90 more)    | ⊕⊕⊕○<br>MODERATE | IMPORTANT  |
| <b>RBCs transfused - Low-dose or enteral TXA</b>                     |              |               |              |                      |                      |                 |                 |                                  |                                                           |                  |            |
| 2 RCTs                                                               | not serious  | not serious   | not serious  | serious <sup>b</sup> | none                 | 116             | 111             | -                                | <b>MD 1.12 lower</b><br>(1.56 lower to 0.67 lower)        | ⊕⊕⊕○<br>MODERATE | IMPORTANT  |

CI: Confidence interval; RR: Risk ratio; MD: Mean difference

#### Explanations

a. Wide 95% confidence intervals do not exclude clinically significant benefit or harm.

b. Though statistically significant, optimal information size not met resulting in serious imprecision of the overall estimate.

## TXA in patients with GI bleeding

### 1. Mortality at longest follow-up

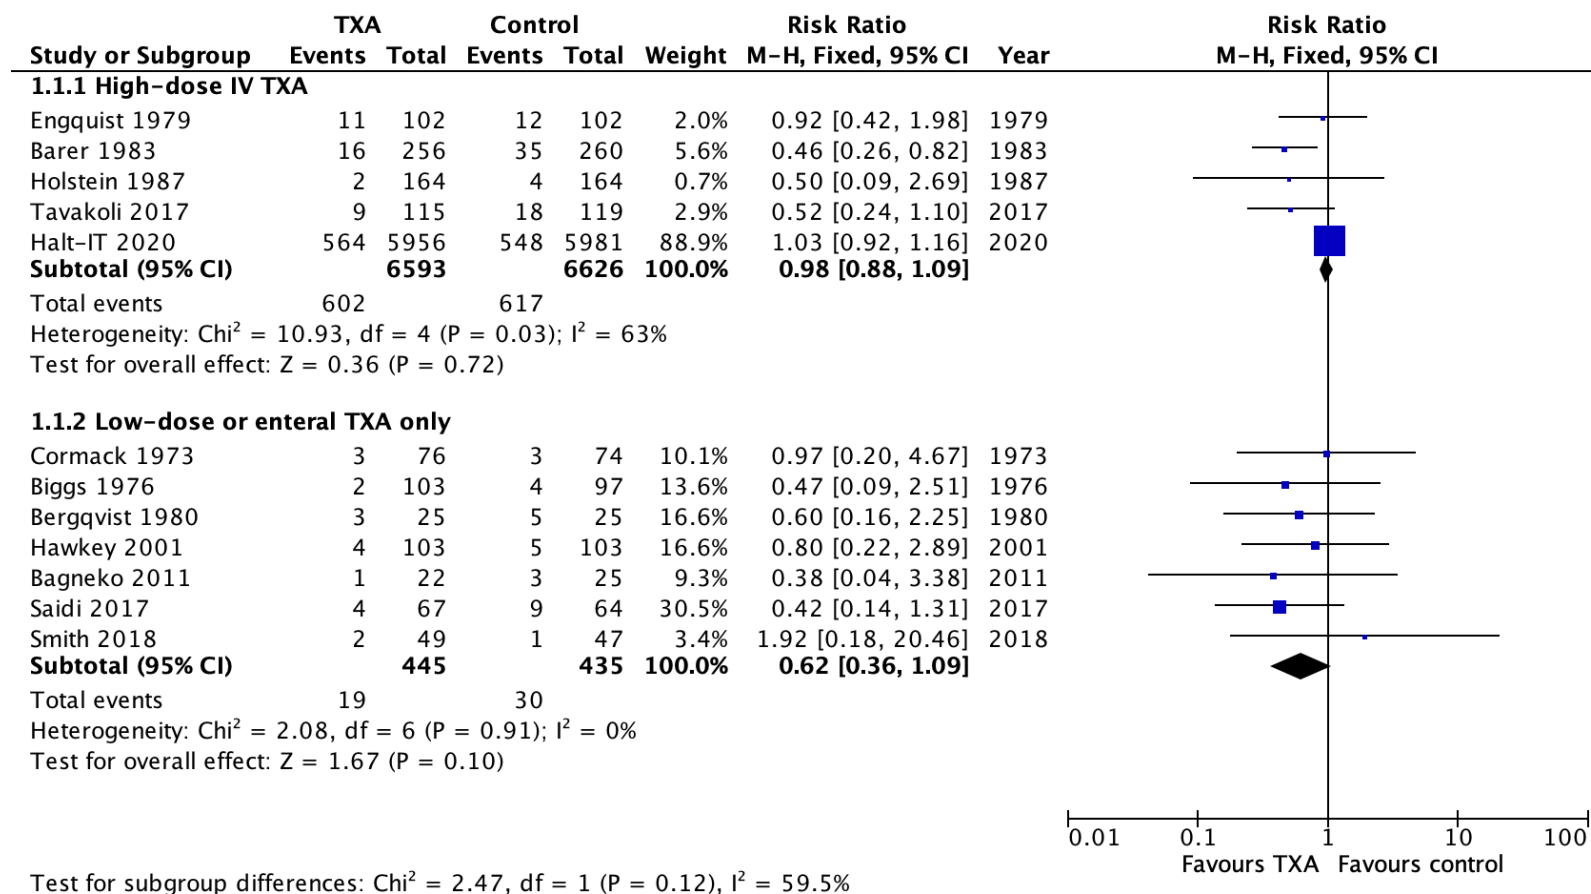



## TXA in patients with GI bleeding

### 2. Rebleeding

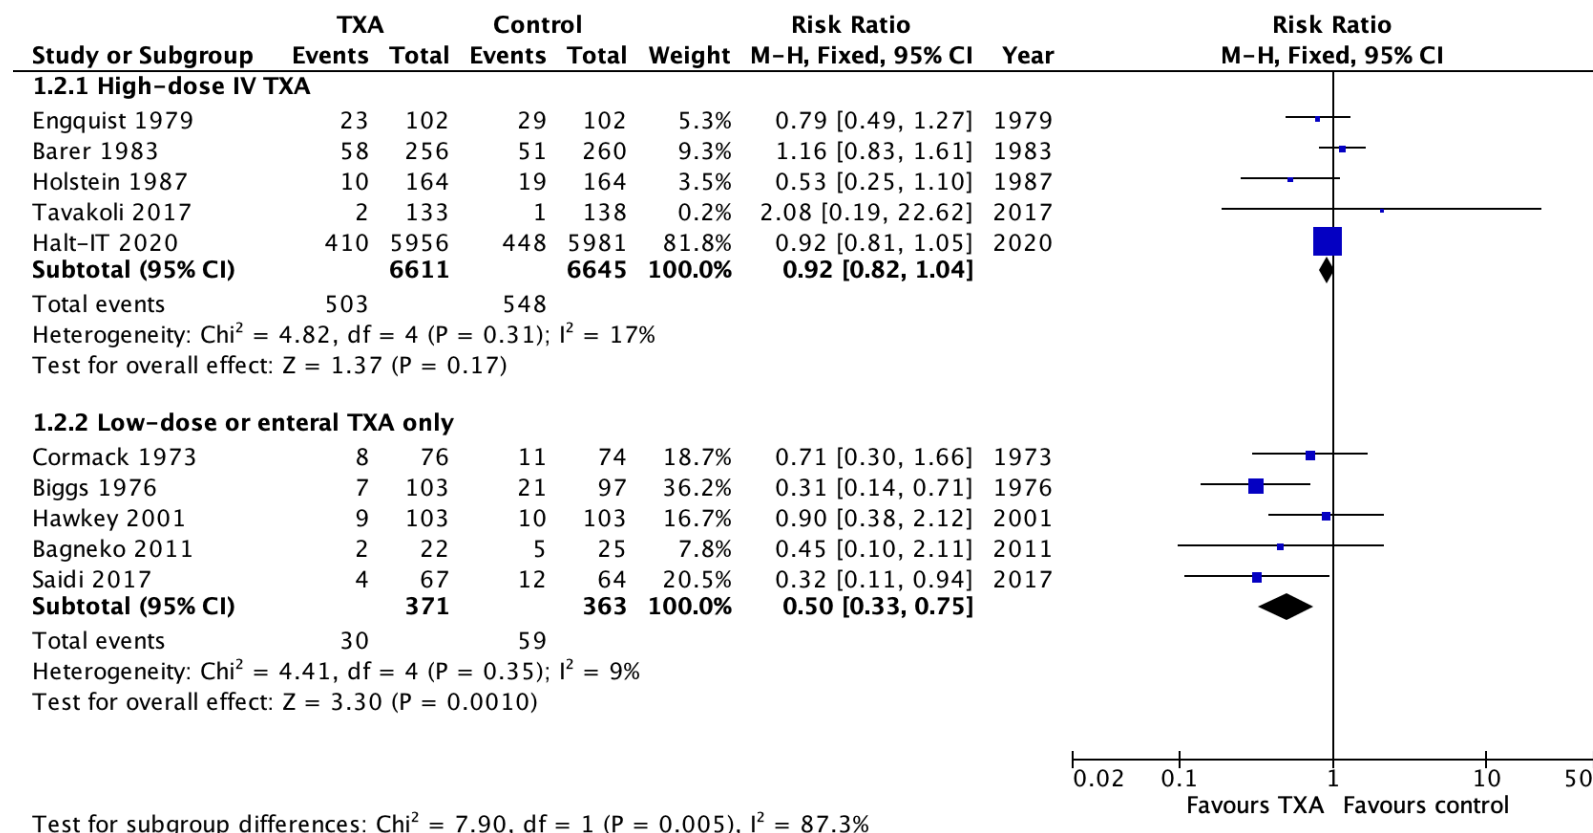

## TXA in patients with GI bleeding

### 3. Surgical intervention

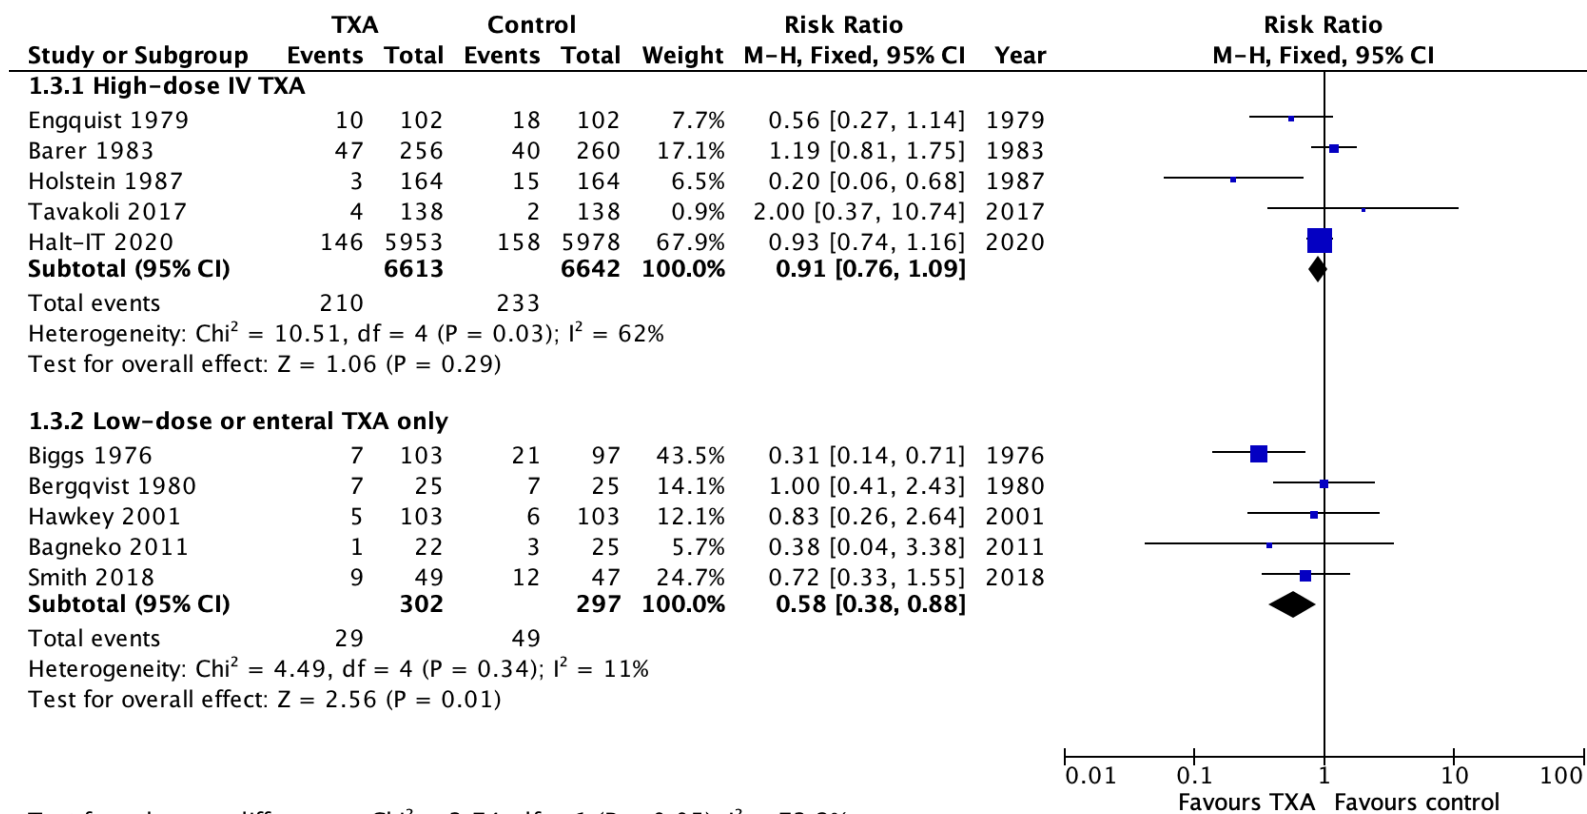

## TXA in patients with GI bleeding

### 4. Stroke

| Study or Subgroup                                                                  | TXA    |             | Control |             | Weight        | Risk Ratio<br>M-H, Fixed, 95% CI | Year |
|------------------------------------------------------------------------------------|--------|-------------|---------|-------------|---------------|----------------------------------|------|
|                                                                                    | Events | Total       | Events  | Total       |               |                                  |      |
| <b>1.7.1 High-dose IV TXA</b>                                                      |        |             |         |             |               |                                  |      |
| Engquist 1979                                                                      | 0      | 102         | 2       | 102         | 10.7%         | 0.20 [0.01, 4.11]                | 1979 |
| Barer 1983                                                                         | 1      | 256         | 0       | 260         | 2.1%          | 3.05 [0.12, 74.44]               | 1983 |
| Holstein 1987                                                                      | 0      | 164         | 2       | 164         | 10.7%         | 0.20 [0.01, 4.13]                | 1987 |
| Halt-IT 2020                                                                       | 19     | 5952        | 18      | 5977        | 76.6%         | 1.06 [0.56, 2.02]                | 2020 |
| <b>Subtotal (95% CI)</b>                                                           |        | <b>6474</b> |         | <b>6503</b> | <b>100.0%</b> | <b>0.92 [0.51, 1.65]</b>         |      |
| Total events                                                                       | 20     |             | 22      |             |               |                                  |      |
| Heterogeneity: $\text{Chi}^2 = 2.68$ , $\text{df} = 3$ ( $P = 0.44$ ); $I^2 = 0\%$ |        |             |         |             |               |                                  |      |
| Test for overall effect: $Z = 0.28$ ( $P = 0.78$ )                                 |        |             |         |             |               |                                  |      |

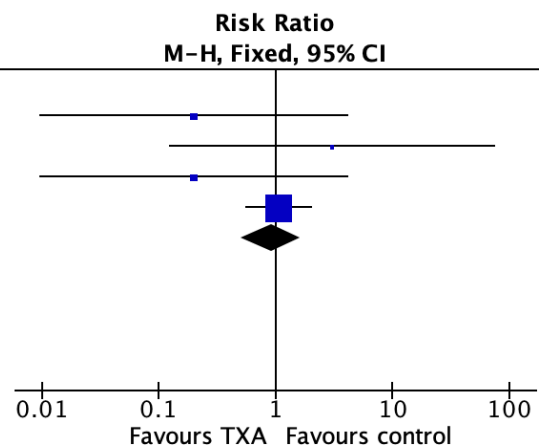

Test for subgroup differences: Not applicable

### 5. Myocardial infarction

| Study or Subgroup                                                                   | TXA    |             | Control |             | Weight        | Risk Ratio<br>M-H, Fixed, 95% CI | Year |
|-------------------------------------------------------------------------------------|--------|-------------|---------|-------------|---------------|----------------------------------|------|
|                                                                                     | Events | Total       | Events  | Total       |               |                                  |      |
| <b>1.8.1 High-dose IV TXA</b>                                                       |        |             |         |             |               |                                  |      |
| Engquist 1979                                                                       | 2      | 102         | 0       | 102         | 1.8%          | 5.00 [0.24, 102.87]              | 1979 |
| Halt-IT 2020                                                                        | 24     | 5952        | 28      | 5977        | 98.2%         | 0.86 [0.50, 1.48]                | 2020 |
| <b>Subtotal (95% CI)</b>                                                            |        | <b>6054</b> |         | <b>6079</b> | <b>100.0%</b> | <b>0.93 [0.55, 1.58]</b>         |      |
| Total events                                                                        | 26     |             | 28      |             |               |                                  |      |
| Heterogeneity: $\text{Chi}^2 = 1.27$ , $\text{df} = 1$ ( $P = 0.26$ ); $I^2 = 21\%$ |        |             |         |             |               |                                  |      |
| Test for overall effect: $Z = 0.26$ ( $P = 0.80$ )                                  |        |             |         |             |               |                                  |      |

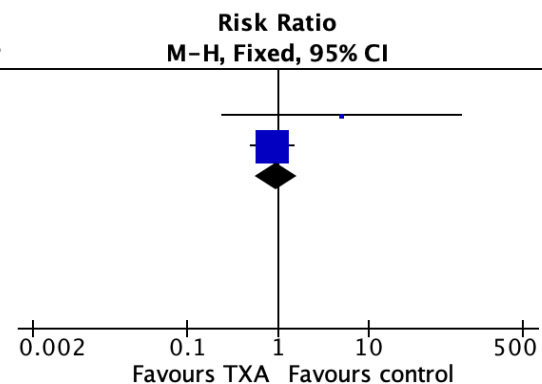

Test for subgroup differences: Not applicable

## TXA in patients with GI bleeding

### 6. Deep venous thrombosis

| Study or Subgroup                                                                  | TXA    |             | Control |             | Weight        | Risk Ratio<br>M-H, Fixed, 95% CI | Year |
|------------------------------------------------------------------------------------|--------|-------------|---------|-------------|---------------|----------------------------------|------|
|                                                                                    | Events | Total       | Events  | Total       |               |                                  |      |
| <b>1.9.1 High-dose IV TXA</b>                                                      |        |             |         |             |               |                                  |      |
| Engquist 1979                                                                      | 4      | 102         | 2       | 102         | 13.4%         | 2.00 [0.37, 10.68]               | 1979 |
| Barer 1983                                                                         | 1      | 256         | 0       | 260         | 3.3%          | 3.05 [0.12, 74.44]               | 1983 |
| Holstein 1987                                                                      | 1      | 164         | 0       | 164         | 3.3%          | 3.00 [0.12, 73.11]               | 1987 |
| Halt-IT 2020                                                                       | 23     | 5952        | 12      | 5977        | 80.0%         | 1.92 [0.96, 3.86]                | 2020 |
| <b>Subtotal (95% CI)</b>                                                           |        | <b>6474</b> |         | <b>6503</b> | <b>100.0%</b> | <b>2.01 [1.08, 3.72]</b>         |      |
| Total events                                                                       | 29     |             | 14      |             |               |                                  |      |
| Heterogeneity: $\text{Chi}^2 = 0.14$ , $\text{df} = 3$ ( $P = 0.99$ ); $I^2 = 0\%$ |        |             |         |             |               |                                  |      |
| Test for overall effect: $Z = 2.21$ ( $P = 0.03$ )                                 |        |             |         |             |               |                                  |      |

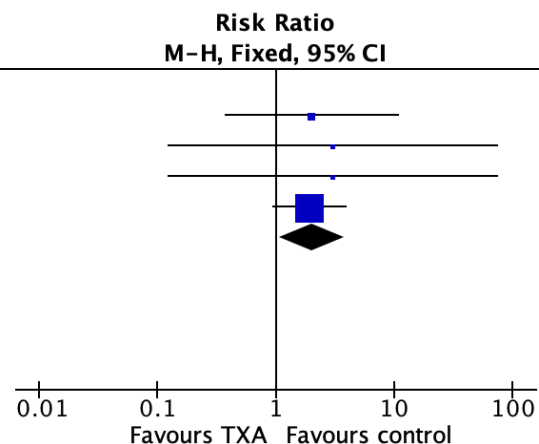

Test for subgroup differences: Not applicable

### 7. Pulmonary embolism

| Study or Subgroup                                                                  | TXA    |             | Control |             | Weight        | Risk Ratio<br>M-H, Fixed, 95% CI | Year |
|------------------------------------------------------------------------------------|--------|-------------|---------|-------------|---------------|----------------------------------|------|
|                                                                                    | Events | Total       | Events  | Total       |               |                                  |      |
| <b>1.10.1 High-dose IV TXA</b>                                                     |        |             |         |             |               |                                  |      |
| Engquist 1979                                                                      | 5      | 102         | 2       | 102         | 9.1%          | 2.50 [0.50, 12.59]               | 1979 |
| Barer 1983                                                                         | 5      | 256         | 2       | 260         | 9.0%          | 2.54 [0.50, 12.97]               | 1983 |
| Holstein 1987                                                                      | 1      | 164         | 2       | 164         | 9.1%          | 0.50 [0.05, 5.46]                | 1987 |
| Bagneko 2011                                                                       | 0      | 22          | 0       | 25          |               | Not estimable                    | 2011 |
| Halt-IT 2020                                                                       | 28     | 5952        | 16      | 5977        | 72.7%         | 1.76 [0.95, 3.24]                | 2020 |
| <b>Subtotal (95% CI)</b>                                                           |        | <b>6496</b> |         | <b>6528</b> | <b>100.0%</b> | <b>1.78 [1.06, 3.00]</b>         |      |
| Total events                                                                       | 39     |             | 22      |             |               |                                  |      |
| Heterogeneity: $\text{Chi}^2 = 1.44$ , $\text{df} = 3$ ( $P = 0.70$ ); $I^2 = 0\%$ |        |             |         |             |               |                                  |      |
| Test for overall effect: $Z = 2.17$ ( $P = 0.03$ )                                 |        |             |         |             |               |                                  |      |

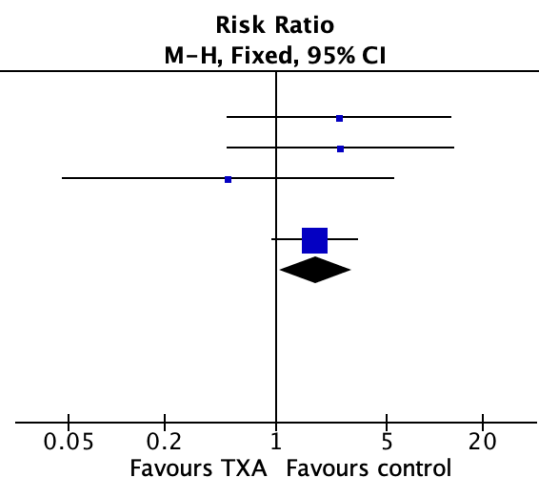

Test for subgroup differences: Not applicable

## TXA in patients with GI bleeding

### 8. Need for RBC Transfusion

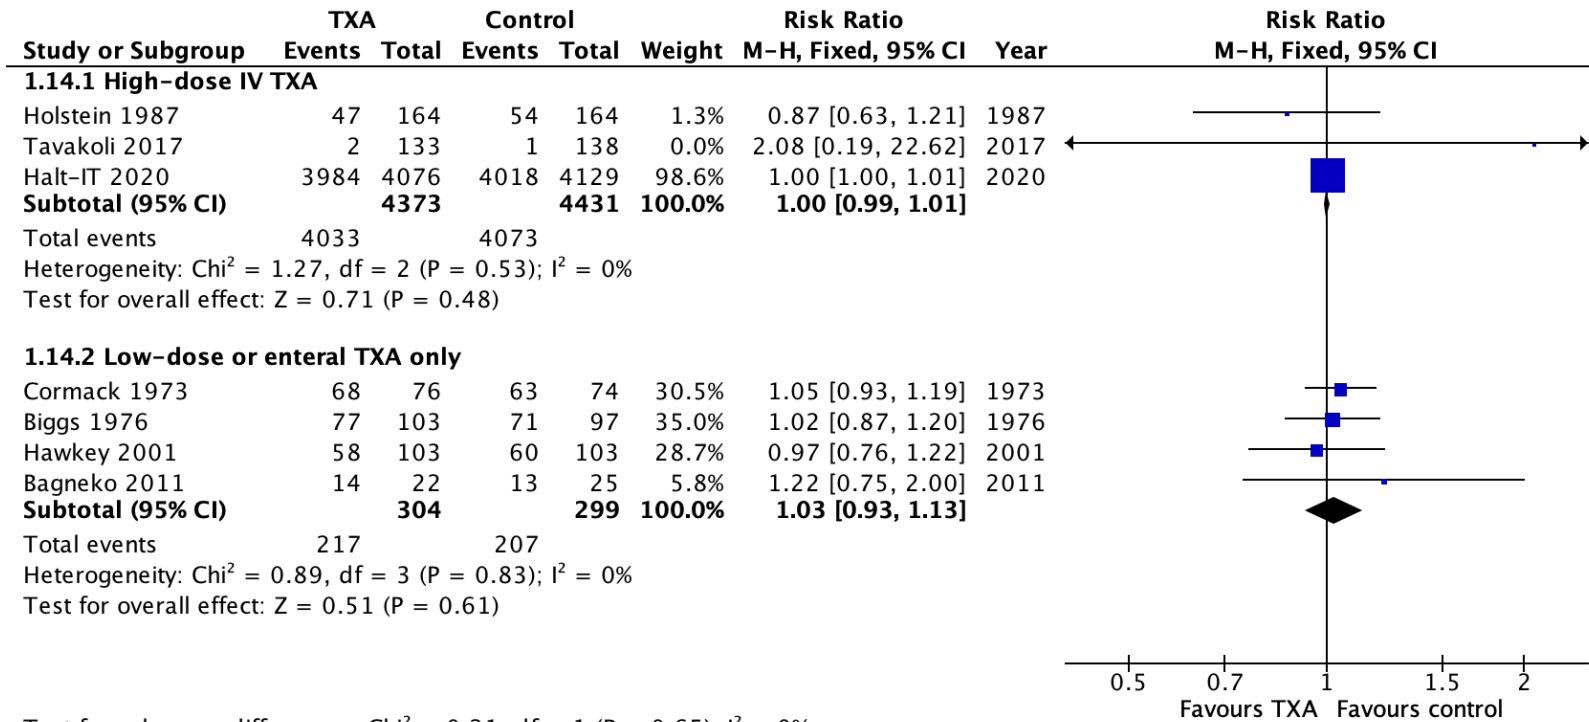

Supplement: MOESM1 [file 19785426]
