# Supplementary material for: Transfusion strategies in bleeding critically ill adults: a clinical practice guideline from the European Society of Intensive Care Medicine
Source: Springer Nature journal article supplement (doi:10.1007/s00134-021-06531-x), 2021-10-22
Supplement: MOESM2 [file 19785426]

**PICO 1 (massive bleeding) & PICO 2 (non-massive bleeding)****Point of care testing**

Updated Wikkels 2016 et al. from January 2016 to September 3, 2019

Total references imported= 2053; duplicates removed= 507

|   |                                                                                                                                                                                                             |         |
|---|-------------------------------------------------------------------------------------------------------------------------------------------------------------------------------------------------------------|---------|
| 1 | exp Thrombelastography/ or Thromb?elastograph*.mp. or (ROTEM or TEG or ROTEG).mp. or Thromboelastometry.mp.                                                                                                 | 11107   |
| 2 | ((randomized controlled trial or controlled clinical trial).pt. or randomized.ab. or placebo.ab. or drug therapy.fs. or randomly.ab. or trial.ab. or groups.ab.) not (animals not (humans and animals)).sh. | 6706906 |
| 3 | 1 and 2                                                                                                                                                                                                     | 3772    |
| 4 | limit 3 to yr="2016 -Current"                                                                                                                                                                               | 1313    |

**Embase 1974 to 2019 August 30**

|   |                                                                                                                                                                                                                                                                                                                                                                                                  |         |
|---|--------------------------------------------------------------------------------------------------------------------------------------------------------------------------------------------------------------------------------------------------------------------------------------------------------------------------------------------------------------------------------------------------|---------|
| 1 | Thromboelastography/ or (thromboelastogra\$ or thrombelastogra\$ or thrombo elastogra\$ or thromboelastom\$ or thrombo elastom\$).ti,ab. or (ROTEM or ROTEG or TEG).mp.                                                                                                                                                                                                                          | 10362   |
| 2 | (randomized-controlled-trial/ or randomization/ or controlled-study/ or multicenter-study/ or phase-3-clinical-trial/ or phase-4-clinical-trial/ or double-blind-procedure/ or single-blind-procedure/ or (random* or cross?over* or factorial* or placebo* or volunteer* or ((singl* or doubl* or trebl* or tripl*) adj3 (blind* or mask*))).ti,ab.) not (animals not (humans and animals)).sh. | 8008033 |
| 3 | 1 and 2                                                                                                                                                                                                                                                                                                                                                                                          | 3876    |
| 4 | limit 3 to yr="2016 -Current"                                                                                                                                                                                                                                                                                                                                                                    | 1774    |

**EBM Reviews - Cochrane Central Register of Controlled Trials July 2019 (Run Sept. 3, 2019)**

|   |                                                                                                                                                                 |     |
|---|-----------------------------------------------------------------------------------------------------------------------------------------------------------------|-----|
| 1 | Thromboelastography.mp. or exp Thrombelastography/                                                                                                              | 512 |
| 2 | (thromboelastogra* or thrombelastogra* or thromboelastom*ROTEG or ROTEM or TEG).mp. [mp=title, original title, abstract, mesh headings, heading words, keyword] | 837 |
| 3 | 1 or 2                                                                                                                                                          | 837 |
| 4 | limit 3 to yr="2016 -Current"                                                                                                                                   | 282 |

**PICO 2 (massive bleeding) & PICO 8 (non-massive bleeding) - TXA vs. no TXA**

Search strategy modified from Ker K, Roberts I, Shakur H, Coats TJ. Antifibrinolytic drugs for acute traumatic injury. Cochrane Database of Systematic Reviews 2015, Issue 5. Art. No.: CD004896. DOI: 10.1002/14651858.CD004896.pub4.

17398 studies imported; 6705 duplicates removed

**OVID Medline Epub Ahead of Print, In-Process & Other Non-Indexed Citations, Ovid MEDLINE(R) Daily and Ovid MEDLINE(R) 1946 to Present (August 28 2019)**

|    |                                                                                                                                                                                                                                                                                                                                                                                                                                                                                                                                                                                                                                                                                                                                                                                                                                                                           |         |
|----|---------------------------------------------------------------------------------------------------------------------------------------------------------------------------------------------------------------------------------------------------------------------------------------------------------------------------------------------------------------------------------------------------------------------------------------------------------------------------------------------------------------------------------------------------------------------------------------------------------------------------------------------------------------------------------------------------------------------------------------------------------------------------------------------------------------------------------------------------------------------------|---------|
| 1  | exp Antifibrinolytic Agents/                                                                                                                                                                                                                                                                                                                                                                                                                                                                                                                                                                                                                                                                                                                                                                                                                                              | 26737   |
| 2  | (anti-fibrinolytic* or antifibrinolytic* or antifibrinolysin* or anti-fibrinolysin* or antiplasmin* or anti-plasmin* or ((plasmin or fibrinolysis) adj3 inhibitor*)).ab,ti.                                                                                                                                                                                                                                                                                                                                                                                                                                                                                                                                                                                                                                                                                               | 8325    |
| 3  | exp Tranexamic Acid/                                                                                                                                                                                                                                                                                                                                                                                                                                                                                                                                                                                                                                                                                                                                                                                                                                                      | 3200    |
| 4  | (tranexamic or Cyclohexanecarboxylic Acid* or Methylamine* or amcha or trans-4-aminomethyl-cyclohexanecarboxylic acid* or t- amcha or amca or kabi 2161 or transamin* or exacyl or amchafibrin or anvitoff or spotof or cyklokapron or ugurol or amino methylcyclo- hexane carboxylate or aminomethylcyclohexanecarbonic acid or aminomethylcyclohexanecarboxylic acid or AMCHA or amchafibrin or amikapron or aminomethyl cyclohexane carboxylic acid or aminomethyl cyclohexanecarboxylic acid or aminomethylcyclohexane carbonic acid or aminomethylcyclohexane carboxylic acid or aminomethylcyclohexanecarbonic acid or aminomethylcyclohexanecarboxylic acid or aminomethylcyclohexanoic acid or amstat or anvitoff or cl?65336 or cl65336 or cyclocapron or cyclokapron or cyklocapron or exacyl or frenolyse or hexacapron or hexakapron or tranex or TXA).ab,ti. | 39719   |
| 5  | 1 or 2 or 3 or 4                                                                                                                                                                                                                                                                                                                                                                                                                                                                                                                                                                                                                                                                                                                                                                                                                                                          | 68435   |
| 6  | randomi?ed.ab,ti.                                                                                                                                                                                                                                                                                                                                                                                                                                                                                                                                                                                                                                                                                                                                                                                                                                                         | 583195  |
| 7  | randomized controlled trial.pt.                                                                                                                                                                                                                                                                                                                                                                                                                                                                                                                                                                                                                                                                                                                                                                                                                                           | 488125  |
| 8  | controlled clinical trial.pt.                                                                                                                                                                                                                                                                                                                                                                                                                                                                                                                                                                                                                                                                                                                                                                                                                                             | 93250   |
| 9  | placebo.ab.                                                                                                                                                                                                                                                                                                                                                                                                                                                                                                                                                                                                                                                                                                                                                                                                                                                               | 200377  |
| 10 | clinical trials as topic.sh.                                                                                                                                                                                                                                                                                                                                                                                                                                                                                                                                                                                                                                                                                                                                                                                                                                              | 188123  |
| 11 | randomly.ab.                                                                                                                                                                                                                                                                                                                                                                                                                                                                                                                                                                                                                                                                                                                                                                                                                                                              | 317182  |
| 12 | trial.ti.                                                                                                                                                                                                                                                                                                                                                                                                                                                                                                                                                                                                                                                                                                                                                                                                                                                                 | 203894  |
| 13 | 6 or 7 or 8 or 9 or 10 or 11 or 12                                                                                                                                                                                                                                                                                                                                                                                                                                                                                                                                                                                                                                                                                                                                                                                                                                        | 1275814 |
| 14 | (animals not (humans and animals)).sh.                                                                                                                                                                                                                                                                                                                                                                                                                                                                                                                                                                                                                                                                                                                                                                                                                                    | 4579433 |
| 15 | 13 not 14                                                                                                                                                                                                                                                                                                                                                                                                                                                                                                                                                                                                                                                                                                                                                                                                                                                                 | 1175551 |
| 16 | 5 and 15                                                                                                                                                                                                                                                                                                                                                                                                                                                                                                                                                                                                                                                                                                                                                                                                                                                                  | 5475    |

## EMBASE 1974 to 2019 August 27

|    |                                                                                                                                                                                                                                                                                                                                                                                                                                                                                                                                                                                                                                                                                                                                                                                                                                                                                                                    |         |
|----|--------------------------------------------------------------------------------------------------------------------------------------------------------------------------------------------------------------------------------------------------------------------------------------------------------------------------------------------------------------------------------------------------------------------------------------------------------------------------------------------------------------------------------------------------------------------------------------------------------------------------------------------------------------------------------------------------------------------------------------------------------------------------------------------------------------------------------------------------------------------------------------------------------------------|---------|
| 1  | exp Antifibrinolytic Agent/                                                                                                                                                                                                                                                                                                                                                                                                                                                                                                                                                                                                                                                                                                                                                                                                                                                                                        | 30226   |
| 2  | (anti-fibrinolytic* or antifibrinolytic* or antifibrinolysin* or anti-fibrinolysin* or antiplasmin* or anti-plasmin* or ((plasmin or fibrinolysis) adj3 inhibitor*)).ab,ti.                                                                                                                                                                                                                                                                                                                                                                                                                                                                                                                                                                                                                                                                                                                                        | 10482   |
| 3  | exp Tranexamic Acid/                                                                                                                                                                                                                                                                                                                                                                                                                                                                                                                                                                                                                                                                                                                                                                                                                                                                                               | 12293   |
| 4  | (tranexamic or Cyclohexanecarboxylic Acid* or Methylamine* or amcha or trans-4-aminomethyl-cyclohexanecarboxylic acid* or t- amcha or amca or kabi 2161 or transamin* or exacyl or amchafibrin or anvitoff or spotof or cyklokapron or ugurol or amino methylcyclo- hexane carboxylate or aminomethylcyclohexanecarbonic acid or aminomethylcyclohexanecarboxylic acid or AMCHA or amchafibrin or amikapron or aminomethyl cyclohexane carboxylic acid or aminomethyl cyclohexanecarboxylic acid or aminomethylcyclohexane carbonic acid or aminomethylcyclohexane carboxylic acid or aminomethylcyclohexanecarbonic acid or aminomethylcyclohexanecarboxylic acid or aminomethylcyclohexanocarboxylic acid or aminomethylcyclohexanoic acid or amstat or anvitoff or cl?65336 or cl65336 or cyclocapron or cyclokapron or cyklocapron or exacyl or frenolyse or hexacapron or hexakapron or tranex or TXA).ab,ti. | 52265   |
| 5  | 1 or 2 or 3 or 4                                                                                                                                                                                                                                                                                                                                                                                                                                                                                                                                                                                                                                                                                                                                                                                                                                                                                                   | 82145   |
| 6  | exp Randomized Controlled Trial/                                                                                                                                                                                                                                                                                                                                                                                                                                                                                                                                                                                                                                                                                                                                                                                                                                                                                   | 567516  |
| 7  | exp controlled clinical trial/                                                                                                                                                                                                                                                                                                                                                                                                                                                                                                                                                                                                                                                                                                                                                                                                                                                                                     | 752918  |
| 8  | randomi?ed.ab,ti.                                                                                                                                                                                                                                                                                                                                                                                                                                                                                                                                                                                                                                                                                                                                                                                                                                                                                                  | 838495  |
| 9  | placebo.ab.                                                                                                                                                                                                                                                                                                                                                                                                                                                                                                                                                                                                                                                                                                                                                                                                                                                                                                        | 285955  |
| 10 | *Clinical Trial/                                                                                                                                                                                                                                                                                                                                                                                                                                                                                                                                                                                                                                                                                                                                                                                                                                                                                                   | 17557   |
| 11 | randomly.ab.                                                                                                                                                                                                                                                                                                                                                                                                                                                                                                                                                                                                                                                                                                                                                                                                                                                                                                       | 419434  |
| 12 | trial.ti.                                                                                                                                                                                                                                                                                                                                                                                                                                                                                                                                                                                                                                                                                                                                                                                                                                                                                                          | 279393  |
| 13 | 6 or 7 or 8 or 9 or 10 or 11 or 12                                                                                                                                                                                                                                                                                                                                                                                                                                                                                                                                                                                                                                                                                                                                                                                                                                                                                 | 1615161 |
| 14 | exp animal/ not (exp human/ and exp animal/)                                                                                                                                                                                                                                                                                                                                                                                                                                                                                                                                                                                                                                                                                                                                                                                                                                                                       | 4505841 |
| 15 | 13 not 14                                                                                                                                                                                                                                                                                                                                                                                                                                                                                                                                                                                                                                                                                                                                                                                                                                                                                                          | 1478052 |
| 16 | 5 and 15                                                                                                                                                                                                                                                                                                                                                                                                                                                                                                                                                                                                                                                                                                                                                                                                                                                                                                           | 7581    |

### EBM Reviews - Cochrane Central Register of Controlled Trials July 2019

1. Tranexamic Acid.mp. or exp Tranexamic Acid/ Results - 2342

**PICO 3 (Empiric/early fibrinogen vs. lab-driven fibrinogen) & PICO 11: Liberal vs. restrictive fibrinogen (non-massive)**

Update from PMID: 23986527 From August 1 2013 to September 1, 2019

Total references imported= 2511; Duplicates removed = 911

**OVID Medline Epub Ahead of Print, In-Process & Other Non-Indexed Citations,  
Ovid MEDLINE(R) Daily and Ovid MEDLINE(R) 1946 to Present (run Sept 1, 2019)**

|    |                                              |         |
|----|----------------------------------------------|---------|
| 1  | Fibrin Tissue Adhesive/ or exp Fibrinogen/   | 43330   |
| 2  | fibrinogen concentrate.mp. or fibrin*.ti,ab. | 101899  |
| 3  | 1 or 2                                       | 114230  |
| 4  | exp Hemorrhage/ or Afibrinogenemia/          | 320519  |
| 5  | (hypofibrinogen?em* or bleeding).mp.         | 193084  |
| 6  | 4 or 5                                       | 438165  |
| 7  | 3 and 6                                      | 13841   |
| 8  | randomi?ed.ab,ti.                            | 583387  |
| 9  | randomized controlled trial.pt.              | 488336  |
| 10 | controlled clinical trial.pt.                | 93253   |
| 11 | placebo.ab.                                  | 200411  |
| 12 | clinical trials as topic.sh.                 | 188167  |
| 13 | randomly.ab.                                 | 317270  |
| 14 | trial.ti.                                    | 203972  |
| 15 | 8 or 9 or 10 or 11 or 12 or 13 or 14         | 1276116 |
| 16 | 7 and 15                                     | 1871    |
| 17 | limit 16 to yr="2012 -Current"               | 551     |

**Embase 1996 to 2019 August 30**

|   |                                         |        |
|---|-----------------------------------------|--------|
| 1 | fibrin glue/                            | 8437   |
| 2 | fibrinogen/                             | 46950  |
| 3 | fibrinogen concentrate.mp.              | 1161   |
| 4 | fibrin*.ti,ab.                          | 90193  |
| 5 | 1 or 2 or 3 or 4                        | 105322 |
| 6 | bleeding/                               | 245385 |
| 7 | afibrinogenemia/                        | 676    |
| 8 | (hypofibrinogen?em* or bleeding).ti,ab. | 258929 |

|    |                                        |         |
|----|----------------------------------------|---------|
| 9  | 6 or 7 or 8                            | 387955  |
| 10 | 5 and 9                                | 15882   |
| 11 | exp Randomized Controlled Trial/       | 523199  |
| 12 | exp controlled clinical trial/         | 684172  |
| 13 | randomi?ed.ab,ti.                      | 781053  |
| 14 | placebo.ab.                            | 239813  |
| 15 | *Clinical Trial/                       | 11581   |
| 16 | randomly.ab.                           | 380468  |
| 17 | trial.ti.                              | 248849  |
| 18 | 11 or 12 or 13 or 14 or 15 or 16 or 17 | 1437785 |
| 19 | 10 and 18                              | 2163    |
| 20 | limit 19 to yr="2013 -Current"         | 862     |

### EBM Reviews - Cochrane Central Register of Controlled Trials July 2019

|    |                                                           |       |
|----|-----------------------------------------------------------|-------|
| 1  | fibrin tissue adhesive.mp. or exp Fibrin Tissue Adhesive/ | 465   |
| 2  | exp Fibrinogen/ or fibrinogen.mp.                         | 5387  |
| 3  | (fibrinogen?concentrate or fibrin*).ti,ab.                | 9107  |
| 4  | 1 or 2 or 3                                               | 10048 |
| 5  | exp Hemorrhage/ or hemorrhage.mp.                         | 28426 |
| 6  | Afibrinogenemia/                                          | 10    |
| 7  | (hypofibrinogen?em* or bleeding).mp.                      | 40208 |
| 8  | 5 or 6 or 7                                               | 57116 |
| 9  | 4 and 8                                                   | 2470  |
| 10 | limit 9 to yr "2013-Current"                              | 913   |

**PICO 4: PCC vs. plasma in massive bleeding***Modified from PMID: 30342540*

Total references =2,717, duplicates removed = 165

**OVID Medline Epub Ahead of Print, In-Process & Other Non-Indexed Citations, Ovid MEDLINE(R) Daily and Ovid MEDLINE(R) 1946 to Present (run August 30 2019)**

|    |                                                                                                                                                                                                                                                                                                                                                                                                                           |         |
|----|---------------------------------------------------------------------------------------------------------------------------------------------------------------------------------------------------------------------------------------------------------------------------------------------------------------------------------------------------------------------------------------------------------------------------|---------|
| 1  | Hemostatics/ or exp prothrombin/                                                                                                                                                                                                                                                                                                                                                                                          | 19787   |
| 2  | Prothrombin complex concentrate.ti,ab.                                                                                                                                                                                                                                                                                                                                                                                    | 999     |
| 3  | (PCC\$ or 4F-PCC\$ or 3F-PCC\$).ti,ab.                                                                                                                                                                                                                                                                                                                                                                                    | 13003   |
| 4  | (Kaskadil or Beriplex or Cofact or Confidex or Kcentra or Ocplex or Octaplex or PPSB or Profilnine or Profiline SD or ProthoRAAS or Prothrombin Complex Octapharm or Prothrombinex or Prothromplex or Prothromplex Immuno Tim4 or Prothromplex NF or Prothromplex Total or Prothromplex Total NF or Protromplex TIM 3 or Proplex or Proplex-T or Pushu Laishi or TachoSil or Uman or Uman Complex or Uman-Complex).ti,ab. | 569     |
| 5  | 1 or 2 or 3 or 4                                                                                                                                                                                                                                                                                                                                                                                                          | 33497   |
| 6  | Plasma/ or plasma.ti,ab.                                                                                                                                                                                                                                                                                                                                                                                                  | 856509  |
| 7  | exp Blood Component Transfusion/ or exp Blood Transfusion/                                                                                                                                                                                                                                                                                                                                                                | 83341   |
| 8  | 6 or 7                                                                                                                                                                                                                                                                                                                                                                                                                    | 927195  |
| 9  | 5 and 8                                                                                                                                                                                                                                                                                                                                                                                                                   | 4485    |
| 10 | Randomized controlled trial.pt.                                                                                                                                                                                                                                                                                                                                                                                           | 488277  |
| 11 | controlled clinical trial.pt.                                                                                                                                                                                                                                                                                                                                                                                             | 93253   |
| 12 | randomized.ab.                                                                                                                                                                                                                                                                                                                                                                                                            | 452973  |
| 13 | placebo.ab.                                                                                                                                                                                                                                                                                                                                                                                                               | 200359  |
| 14 | drug therapy.fs.                                                                                                                                                                                                                                                                                                                                                                                                          | 2134779 |
| 15 | randomly.ab.                                                                                                                                                                                                                                                                                                                                                                                                              | 317145  |
| 16 | trial.ab.                                                                                                                                                                                                                                                                                                                                                                                                                 | 474761  |
| 17 | groups.ab.                                                                                                                                                                                                                                                                                                                                                                                                                | 1948385 |
| 18 | 10 or 11 or 12 or 13 or 14 or 15 or 16 or 17                                                                                                                                                                                                                                                                                                                                                                              | 4512629 |
| 19 | 9 and 18                                                                                                                                                                                                                                                                                                                                                                                                                  | 1410    |

**Embase** 1974 to 2019 August 29

|    |                                                                                                                                                                                                                                                                                                                                                                                                                                                                                                            |        |
|----|------------------------------------------------------------------------------------------------------------------------------------------------------------------------------------------------------------------------------------------------------------------------------------------------------------------------------------------------------------------------------------------------------------------------------------------------------------------------------------------------------------|--------|
| 1  | exp prothrombin complex/                                                                                                                                                                                                                                                                                                                                                                                                                                                                                   | 4171   |
| 2  | Prothrombin complex concentrate.tw.                                                                                                                                                                                                                                                                                                                                                                                                                                                                        | 2018   |
| 3  | (PCC\$ or 4F-PCC\$ or 3F-PCC\$).ti,ab.                                                                                                                                                                                                                                                                                                                                                                                                                                                                     | 17244  |
| 4  | (Kaskadil or Beriplex or Beriplex or Cofact or Confidex or Kcentra or Ocplex or Octaplex or PPSB or PPSB-HT Nichiyaku or PPSB-HT or Profilnine or Profiline SD or ProthroRAAS or Prothrombin Complex Octapharm or Prothrombinex-HT or Prothrombinex or Prothromplex or Prothromplex Immuno Tim4 or Prothromplex NF or Prothromplex Total or Prothromplex Total NF or Protromplex TIM 3 or Proplex or Proplex-T or Pushu Laishi or TachoSil or Uman or Uman Complex or Uman-Complex or Uman-Complex).ti,ab. | 1151   |
| 5  | 1 or 2 or 3 or 4                                                                                                                                                                                                                                                                                                                                                                                                                                                                                           | 21362  |
| 6  | exp plasma transfusion/                                                                                                                                                                                                                                                                                                                                                                                                                                                                                    | 4512   |
| 7  | exp blood transfusion/                                                                                                                                                                                                                                                                                                                                                                                                                                                                                     | 167478 |
| 8  | plasma transfusion.ti,ab.                                                                                                                                                                                                                                                                                                                                                                                                                                                                                  | 1022   |
| 9  | 6 or 7 or 8                                                                                                                                                                                                                                                                                                                                                                                                                                                                                                | 167623 |
| 10 | 5 and 9                                                                                                                                                                                                                                                                                                                                                                                                                                                                                                    | 1159   |

**EBM Reviews - Cochrane Central Register of Controlled Trials July 2019**

|   |                                                                                                                                                                                                                                                                                                                                                                                                                                                                   |        |
|---|-------------------------------------------------------------------------------------------------------------------------------------------------------------------------------------------------------------------------------------------------------------------------------------------------------------------------------------------------------------------------------------------------------------------------------------------------------------------|--------|
| 1 | Prothrombin complex.mp.                                                                                                                                                                                                                                                                                                                                                                                                                                           | 239    |
| 2 | (Kaskadil or Beriplex or Cofact or Confidex or Kcentra or Ocplex or Octaplex or PPSB or PPSB-HT Nichiyaku or Profilnine or Profiline or ProthroRAAS or Prothrombin Complex Octapharm or Prothrombinex-HT or Prothrombinex or Prothromplex or Prothromplex Immuno Tim4 or Prothromplex or Prothromplex Total or Prothromplex Total NF or Protromplex TIM 3 or Proplex or Proplex-T or Pushu Laishi or TachoSil or Uman or Uman Complex or Uman-Complex or PCC).mp. | 576    |
| 3 | 1 or 2                                                                                                                                                                                                                                                                                                                                                                                                                                                            | 696    |
| 4 | plasma.mp. or Plasma/                                                                                                                                                                                                                                                                                                                                                                                                                                             | 94190  |
| 5 | Blood Component Transfusion/ or transfusion.mp                                                                                                                                                                                                                                                                                                                                                                                                                    | 14102  |
| 6 | 4 or 5                                                                                                                                                                                                                                                                                                                                                                                                                                                            | 106566 |
| 7 | 3 and 6                                                                                                                                                                                                                                                                                                                                                                                                                                                           | 148    |

**PICO 5 & 14 - Cold storage of platelets (MTP or non-massive bleeding)**

New search: Conducted September 3 2019

*Total references imported= 7965; duplicates removed= 529***Embase** 1974 to 2019 August 30

|   |                                                                                                                                                                                             |      |
|---|---------------------------------------------------------------------------------------------------------------------------------------------------------------------------------------------|------|
| 1 | thrombocyte storage.mp. or exp thrombocyte preservation/                                                                                                                                    | 1664 |
| 2 | ((cold stor\$ adj4 platelet\$) or (platelet\$ stor\$ adj4 temp\$) or (cold stor\$ adj4 thrombocyt\$) or (thrombocyt\$ stor\$ adj4 temp\$) or cold platelet\$ or cold-stor\$ platelet\$).mp. | 223  |
| 3 | 1 or 2                                                                                                                                                                                      | 1802 |

**OVID Medline Epub Ahead of Print, In-Process & Other Non-Indexed Citations, Ovid MEDLINE(R) Daily and Ovid MEDLINE(R) 1946 to Present (Run September 3, 2019)**

|    |                                                                                                                                                                                             |        |
|----|---------------------------------------------------------------------------------------------------------------------------------------------------------------------------------------------|--------|
| 1  | thrombocyte storage.mp. or exp thrombocyte preservation/                                                                                                                                    | 8      |
| 2  | ((cold stor\$ adj4 platelet\$) or (platelet\$ stor\$ adj4 temp\$) or (cold stor\$ adj4 thrombocyt\$) or (thrombocyt\$ stor\$ adj4 temp\$) or cold platelet\$ or cold-stor\$ platelet\$).mp. | 106    |
| 3  | Blood Platelets/                                                                                                                                                                            | 75269  |
| 4  | 1 or 2 or 3                                                                                                                                                                                 | 75305  |
| 5  | Hemorrhage/ or hemorrhage.mp.                                                                                                                                                               | 273125 |
| 6  | massive hemorrhage.mp.                                                                                                                                                                      | 2281   |
| 7  | life threatening bleeding.mp.                                                                                                                                                               | 1306   |
| 8  | exp Blood Transfusion/ or transfusion.mp.                                                                                                                                                   | 140636 |
| 9  | 5 or 6 or 7 or 8                                                                                                                                                                            | 399703 |
| 10 | 4 and 9                                                                                                                                                                                     | 6502   |
| 11 | (animals not (humans and animals)).sh.                                                                                                                                                      | 458060 |
| 12 | 10 not 11                                                                                                                                                                                   | 5862   |

**EBM Reviews - Cochrane Central Register of Controlled Trials July 2019 (Run Sept 3 2019)**

|   |                                                                                                                                                                                             |     |
|---|---------------------------------------------------------------------------------------------------------------------------------------------------------------------------------------------|-----|
| 1 | ((cold stor\$ adj4 platelet\$) or (platelet\$ stor\$ adj4 temp\$) or (cold stor\$ adj4 thrombocyt\$) or (thrombocyt\$ stor\$ adj4 temp\$) or cold platelet\$ or cold-stor\$ platelet\$).mp. | 9   |
| 2 | exp platelet transfusion/                                                                                                                                                                   | 293 |
| 3 | 1 or 2                                                                                                                                                                                      | 301 |



**PICO 6: High vs. low ratio transfusion in massive bleeding***Update of McQuilten et al from January 1, 2017 to September 14, 2019**References retrieved = 5666; duplicates removed = 612***OVID Medline Epub Ahead of Print, In-Process & Other Non-Indexed Citations, Ovid MEDLINE(R) Daily and Ovid MEDLINE(R) 1946 to Present (run September 14 2019)**

|    |                                                                                                                                                                                                                                                                                                                                                                    |        |
|----|--------------------------------------------------------------------------------------------------------------------------------------------------------------------------------------------------------------------------------------------------------------------------------------------------------------------------------------------------------------------|--------|
| 1  | exp *Hemorrhage/                                                                                                                                                                                                                                                                                                                                                   | 207383 |
| 2  | Shock, Hemorrhagic/                                                                                                                                                                                                                                                                                                                                                | 11243  |
| 3  | Exsanguination/                                                                                                                                                                                                                                                                                                                                                    | 334    |
| 4  | ((major* or critical* or severe* or serious* or significant* or massive* or life threatening or substantial* or extrem* or catastrophic or uncontroll* or recurrent or control* or excessive* or acute*) adj3 (bleed* or haemorrhag* or hemorrhag* or blood loss* or bloodloss*)).tw.                                                                              | 91573  |
| 5  | ((haemorrhagic or hemorrhagic or hypovolemic or hypovolaemic) adj shock).tw.                                                                                                                                                                                                                                                                                       | 12026  |
| 6  | or/1-5                                                                                                                                                                                                                                                                                                                                                             | 267606 |
| 7  | Multiple Trauma/ or exp Shock, Traumatic/                                                                                                                                                                                                                                                                                                                          | 17356  |
| 8  | Military Medicine/ or War/                                                                                                                                                                                                                                                                                                                                         | 29688  |
| 9  | (trauma* or neurotrauma* or posttrauma* or military or combat* or battlefield* or battle field* or casual* or iraq* or afghan* or gulf war*).ti.                                                                                                                                                                                                                   | 194195 |
| 10 | ((major* or life threatening or substantial* or multip* or severe* or serious* or catastrophic* or critical* or catastrophic* or massive* or penetrating) adj3 (trauma* or posttrauma* or postrauma* or injury or injuries or injured or postinjur*)).tw.                                                                                                          | 88992  |
| 11 | ((trauma* adj3 coagulopath*) or trauma* resuscitation or polytrauma*).tw.                                                                                                                                                                                                                                                                                          | 5495   |
| 12 | or/7-11                                                                                                                                                                                                                                                                                                                                                            | 284777 |
| 13 | Aortic Rupture/                                                                                                                                                                                                                                                                                                                                                    | 9410   |
| 14 | ((ruptur* or burst*) adj3 aort*).tw.                                                                                                                                                                                                                                                                                                                               | 7210   |
| 15 | or/13-14                                                                                                                                                                                                                                                                                                                                                           | 12749  |
| 16 | 12 or 15                                                                                                                                                                                                                                                                                                                                                           | 296052 |
| 17 | exp Blood Transfusion/                                                                                                                                                                                                                                                                                                                                             | 83428  |
| 18 | (massive* transfus* or massive blood transfus*).tw.                                                                                                                                                                                                                                                                                                                | 2126   |
| 19 | (severe trauma* or major* trauma* or massive* trauma* or multiple trauma* or polytrauma* or severe* injur* or serious injur* or massive* injur* or critical* injur* or major* injur* or life-threatening injur* or multiple injur* or coagulopath* or coagulation deficien* or hyperfibrinolysis or exsanguination or haemorrhagic shock or hemorrhagic shock).ti. | 18777  |
| 20 | ((major* or critical* or severe* or serious* or massive* or life threatening or substantial* or extrem* or catastrophic or uncontroll*) adj3 (bleed* or haemorrhag* or hemorrhag* or blood loss* or bloodloss*)).ti.                                                                                                                                               | 9789   |

|    |                                                                                                                                                                            |         |
|----|----------------------------------------------------------------------------------------------------------------------------------------------------------------------------|---------|
| 21 | 6 or 16 or 19 or 20                                                                                                                                                        | 550506  |
| 22 | 21 and (17 or 18)                                                                                                                                                          | 14778   |
| 23 | (animal* or cat or cats or dog or dogs or pig or pigs or sheep or rabbit* or mouse or mice or rat or rats or feline or canine or porcine or ovine or murine or model*).ti. | 2405342 |
| 24 | 22 not 23                                                                                                                                                                  | 14263   |
| 25 | limit 24 to yr="2017 -Current"                                                                                                                                             | 1504    |

### Embase 1996 to 2019 September 13

|    |                                                                                                                                                                                                                                                                                                                                                                    |        |
|----|--------------------------------------------------------------------------------------------------------------------------------------------------------------------------------------------------------------------------------------------------------------------------------------------------------------------------------------------------------------------|--------|
| 1  | Hemorrhagic Hypotension/ or Hemorrhagic Shock/                                                                                                                                                                                                                                                                                                                     | 10806  |
| 2  | Exsanguination/                                                                                                                                                                                                                                                                                                                                                    | 885    |
| 3  | ((major* or critical* or severe* or serious* or significant* or massive* or life threatening or substantial* or extrem* or catastrophic or uncontroll* or recurrent or control* or excessive* or acute*) adj3 (bleed* or haemorrhag* or hemorrhag* or blood loss* or bloodloss*).tw.                                                                               | 114229 |
| 4  | ((haemorrhagic or hemorrhagic or hypovolemic or hypovolaemic) adj shock).tw.                                                                                                                                                                                                                                                                                       | 11013  |
| 5  | 1 or 2 or 3 or 4                                                                                                                                                                                                                                                                                                                                                   | 125414 |
| 6  | Multiple Trauma/ or exp Shock, Traumatic/                                                                                                                                                                                                                                                                                                                          | 13046  |
| 7  | exp Blunt Trauma/                                                                                                                                                                                                                                                                                                                                                  | 19545  |
| 8  | Military Medicine/ or War/                                                                                                                                                                                                                                                                                                                                         | 30486  |
| 9  | Battle Injury/                                                                                                                                                                                                                                                                                                                                                     | 3739   |
| 10 | (trauma* or neurotrauma* or posttrauma* or military or combat* or battlefield* or battle field* or casual* or iraq* or afghan* or gulf war*).ti.                                                                                                                                                                                                                   | 166033 |
| 11 | ((major* or life threatening or substantial* or multip* or severe* or serious* or catastrophic* or critical* or catastrophic* or massive* or penetrating) adj3 (trauma* or posttrauma* or postrauma* or injury or injuries or injured or postinjur*).tw.                                                                                                           | 92978  |
| 12 | Aorta Rupture/                                                                                                                                                                                                                                                                                                                                                     | 4242   |
| 13 | ((ruptur* or burst*) adj3 aort*).tw.                                                                                                                                                                                                                                                                                                                               | 6963   |
| 14 | or/6-13                                                                                                                                                                                                                                                                                                                                                            | 270722 |
| 15 | (severe trauma* or major* trauma* or massive* trauma* or multiple trauma* or polytrauma* or severe* injur* or serious injur* or massive* injur* or critical* injur* or major* injur* or life-threatening injur* or multiple injur* or coagulopath* or coagulation deficien* or hyperfibrinolysis or exsanguination or haemorrhagic shock or hemorrhagic shock).ti. | 16501  |
| 16 | ((major* or critical* or severe* or serious* or massive* or life threatening or substantial* or extrem* or catastrophic or uncontroll*) adj3 (bleed* or haemorrhag* or hemorrhag* or blood loss* or bloodloss*).ti.                                                                                                                                                | 8447   |
| 17 | exp Blood Transfusion/                                                                                                                                                                                                                                                                                                                                             | 139812 |

|    |                                                                                                                                                                                                                                                                                                                                                                                                                                                            |         |
|----|------------------------------------------------------------------------------------------------------------------------------------------------------------------------------------------------------------------------------------------------------------------------------------------------------------------------------------------------------------------------------------------------------------------------------------------------------------|---------|
| 18 | Fresh Frozen Plasma/                                                                                                                                                                                                                                                                                                                                                                                                                                       | 15913   |
| 19 | (transfus* or whole blood or old* blood or "age of blood" or fresh* blood or new* blood or young* blood or component therapy or blood component* or blood product* or blood replacement or allogeneic blood or allogenic blood or red cell* or red blood cell* or FFP or fresh plasma or frozen plasma or thawed plasma or liquid plasma or platelets or packed cells or RBC* or PRBC* or cryoprecipitate* or APCC or coagulation factor concentrate*).tw. | 350840  |
| 20 | (massive* transfus* or massive blood transfus*).tw.                                                                                                                                                                                                                                                                                                                                                                                                        | 2852    |
| 21 | or/15-20                                                                                                                                                                                                                                                                                                                                                                                                                                                   | 422615  |
| 22 | 14 and 21                                                                                                                                                                                                                                                                                                                                                                                                                                                  | 20110   |
| 23 | (animal* or cat or cats or dog or dogs or pig or pigs or sheep or rabbit* or mouse or mice or rat or rats or feline or canine or porcine or ovine or murine or model*).ti.                                                                                                                                                                                                                                                                                 | 1683136 |
| 24 | 22 not 23                                                                                                                                                                                                                                                                                                                                                                                                                                                  | 18956   |
| 25 | limit 24 to yr="2017 -Current"                                                                                                                                                                                                                                                                                                                                                                                                                             | 4000    |

### EBM Reviews - Cochrane Central Register of Controlled Trials August 2019

|    |                                                                                                                                                                                                                                                                                        |       |
|----|----------------------------------------------------------------------------------------------------------------------------------------------------------------------------------------------------------------------------------------------------------------------------------------|-------|
| 1  | exp Hemorrhage/                                                                                                                                                                                                                                                                        | 12742 |
| 2  | exp shock,hemorrhagic/                                                                                                                                                                                                                                                                 | 90    |
| 3  | ((major* or critical* or severe* or serious* or significant* or massive* or "life threatening" or substantial* or extrem* or catastrophic or uncontroll* or recurrent or control* or excessive* or acute*) adj3 (bleed* or haemorrhag* or hemorrhag* or blood loss* or bloodloss*).mp. | 16478 |
| 4  | ((haemorrhagic or hemorrhagic or hypovolemic or hypovolaemic) adj1 shock).mp.                                                                                                                                                                                                          | 445   |
| 5  | exp multiple trauma/                                                                                                                                                                                                                                                                   | 209   |
| 6  | exp shock, traumatic/                                                                                                                                                                                                                                                                  | 50    |
| 7  | exp military medicine/                                                                                                                                                                                                                                                                 | 165   |
| 8  | exp war/                                                                                                                                                                                                                                                                               | 31    |
| 9  | (trauma* or neurotrauma* or posttrauma* or military or combat* or battlefield* or "battle field*" or casualt* or iraq* or afghan* or "gulf war*").ti.                                                                                                                                  | 10049 |
| 10 | ((major* or "life threatening" or substantial* or multip* or severe* or serious* or catastrophic* or critical* or catastrophic* or massive* or penetrating) adj3 (trauma* or posttrauma* or posttrauma* or injury or injuries or injured or postinjur*).mp.                            | 7078  |
| 11 | exp aortic rupture/                                                                                                                                                                                                                                                                    | 65    |
| 12 | ((ruptur* or burst*) adj3 aort*).mp                                                                                                                                                                                                                                                    | 272   |
| 13 | or/1-12                                                                                                                                                                                                                                                                                | 40366 |

|    |                                                        |      |
|----|--------------------------------------------------------|------|
| 14 | exp blood transfusion/                                 | 3307 |
| 15 | ("massive* transfus*" or "massive blood transfus*").mp | 138  |
| 16 | 14 or 15                                               | 3418 |
| 17 | 13 and 16                                              | 1440 |
| 18 | limit 17 to yr="2017 -Current"                         | 162  |

**PICO 9: Restrictive vs. liberal RBC transfusion in non-massively bleeding patients**

Search update from Carson et al 2018 from November 13, 2017 to September 4, 2019

References imported = 3824; duplicates removed = 887

**OVID Medline Epub Ahead of Print, In-Process & Other Non-Indexed Citations, Ovid MEDLINE(R) Daily and Ovid MEDLINE(R) 1946 to Present (run September 4, 2019)**

|    |                                                                                                                                                                                                                                                                                                                                       |         |
|----|---------------------------------------------------------------------------------------------------------------------------------------------------------------------------------------------------------------------------------------------------------------------------------------------------------------------------------------|---------|
| 1  | *Blood Transfusion/ad, mt, st, td or *Erythrocyte Transfusion/mt, st, td                                                                                                                                                                                                                                                              | 4482    |
| 2  | ((transfus* or red cell* or red blood cell* or RBC* or PRBC*) adj5 (trigger* or thresh?old* or target* or restrict* or liberal* or aggressive* or conservative* or prophylactic* or limit* or protocol* or policy or policies or practic* or indicat* or strateg* or regimen* or criteri* or standard* or management or program*).tw. | 16104   |
| 3  | ((h?emoglobin or h?ematocrit or HB or HCT) adj5 (polic* or practic* or protocol* or trigger* or threshold* or maintain* or indicator* or strateg* or criteri* or standard*).tw.                                                                                                                                                       | 5956    |
| 4  | (blood adj3 (management or program*).mp.                                                                                                                                                                                                                                                                                              | 6404    |
| 5  | ((transfus* or red cell* or red blood cell* or RBC* or PRBC*) and (critical* or intensive* or h?emorrhag* or bleed*).ti.                                                                                                                                                                                                              | 2126    |
| 6  | 1 or 2 or 3 or 4 or 5                                                                                                                                                                                                                                                                                                                 | 31118   |
| 7  | randomized controlled trial.pt.                                                                                                                                                                                                                                                                                                       | 488416  |
| 8  | controlled clinical trial.pt.                                                                                                                                                                                                                                                                                                         | 93253   |
| 9  | randomi*.tw.                                                                                                                                                                                                                                                                                                                          | 596487  |
| 10 | placebo.ab.                                                                                                                                                                                                                                                                                                                           | 200462  |
| 11 | clinical trials as topic.sh.                                                                                                                                                                                                                                                                                                          | 188178  |
| 12 | randomly.ab.                                                                                                                                                                                                                                                                                                                          | 317368  |
| 13 | groups.ab.                                                                                                                                                                                                                                                                                                                            | 1949625 |
| 14 | trial.tw.                                                                                                                                                                                                                                                                                                                             | 556121  |
| 15 | 7 or 8 or 9 or 10 or 11 or 12 or 13 or 14                                                                                                                                                                                                                                                                                             | 2996302 |
| 16 | exp animals/ not humans/                                                                                                                                                                                                                                                                                                              | 4613961 |
| 17 | 15 not 16                                                                                                                                                                                                                                                                                                                             | 2565642 |
| 18 | 6 and 17                                                                                                                                                                                                                                                                                                                              | 6305    |
| 19 | limit 18 to yr="2017 -Current"                                                                                                                                                                                                                                                                                                        | 1146    |

**Embase 1974 to 2019 September 03**

|   |                                                                                  |       |
|---|----------------------------------------------------------------------------------|-------|
| 1 | *Blood Transfusion/ or Erythrocyte Transfusion/                                  | 36835 |
| 2 | ((red blood cell* or red cell* or RBC* or PRBC*) adj5 (therap* or transfus*).mp. | 23869 |

|    |                                                                                                                                                                                                                                                                                                                                        |         |
|----|----------------------------------------------------------------------------------------------------------------------------------------------------------------------------------------------------------------------------------------------------------------------------------------------------------------------------------------|---------|
| 3  | 1 or 2                                                                                                                                                                                                                                                                                                                                 | 57544   |
| 4  | Standard/ or Gold Standard/                                                                                                                                                                                                                                                                                                            | 383721  |
| 5  | 3 and 4                                                                                                                                                                                                                                                                                                                                | 1066    |
| 6  | ((transfus* or red cell* or red blood cell* or RBC* or PRBC*) adj5 (trigger* or thresh?old* or target* or restrict* or liberal* or aggressive* or conservative* or prophylactic* or limit* or protocol* or policy or policies or practic* or indicat* or strateg* or regimen* or criteri* or standard* or management or program*)).tw. | 26887   |
| 7  | ((h?emoglobin or h?ematocrit or HB or HCT) adj5 (polic* or practic* or protocol* or trigger* or threshold* or maintain* or indicator* or strateg* or criteri* or standard*)).tw.                                                                                                                                                       | 9726    |
| 8  | (blood adj3 (management or program*)).mp.                                                                                                                                                                                                                                                                                              | 10658   |
| 9  | ((transfus* or red cell* or red blood cell* or RBC* or PRBC*) and (critical* or intensive* or h?emorrhag* or bleed*)).ti.                                                                                                                                                                                                              | 2715    |
| 10 | 5 or 6 or 7 or 8 or 9                                                                                                                                                                                                                                                                                                                  | 46075   |
| 11 | Randomized Controlled Trial/                                                                                                                                                                                                                                                                                                           | 568331  |
| 12 | Randomization/                                                                                                                                                                                                                                                                                                                         | 83937   |
| 13 | Single Blind Procedure/                                                                                                                                                                                                                                                                                                                | 36448   |
| 14 | Double Blind Procedure/                                                                                                                                                                                                                                                                                                                | 165111  |
| 15 | Crossover Procedure/                                                                                                                                                                                                                                                                                                                   | 60549   |
| 16 | Placebo/                                                                                                                                                                                                                                                                                                                               | 341103  |
| 17 | exp Clinical Trial/                                                                                                                                                                                                                                                                                                                    | 1426875 |
| 18 | Prospective Study/                                                                                                                                                                                                                                                                                                                     | 548278  |
| 19 | (randomi* or double-blind* or single-blind* or RCT*).tw.                                                                                                                                                                                                                                                                               | 937122  |
| 20 | (random* adj2 (allocat* or assign* or divid* or receiv*)).tw.                                                                                                                                                                                                                                                                          | 304986  |
| 21 | (crossover* or cross over* or cross-over* or placebo*).tw.                                                                                                                                                                                                                                                                             | 367691  |
| 22 | ((treble or triple) adj blind*).tw.                                                                                                                                                                                                                                                                                                    | 1027    |
| 23 | or/11-22                                                                                                                                                                                                                                                                                                                               | 2554459 |
| 24 | Case Study/                                                                                                                                                                                                                                                                                                                            | 64047   |
| 25 | case report*.tw.                                                                                                                                                                                                                                                                                                                       | 464322  |
| 26 | (note or editorial).pt.                                                                                                                                                                                                                                                                                                                | 1400987 |
| 27 | or/24-26                                                                                                                                                                                                                                                                                                                               | 1921214 |
| 28 | 23 not 27                                                                                                                                                                                                                                                                                                                              | 2464206 |

|    |                                |      |
|----|--------------------------------|------|
| 29 | 10 and 28                      | 8114 |
| 30 | limit 29 to yr="2017 -Current" | 1913 |

### EBM Reviews - Cochrane Central Register of Controlled Trials July 2019

|   |                                                                                                                                                                                |  |
|---|--------------------------------------------------------------------------------------------------------------------------------------------------------------------------------|--|
| 1 | Blood Transfusion/                                                                                                                                                             |  |
| 2 | (transfus* adj5 (polic* or practic* or protocol* or trigger* or threshold* or indicator* or strateg* or criteri* or standard*)).mp.                                            |  |
| 3 | ((Red blood cell* or RBC) adj5 (polic* or practic* or protocol* or trigger* or threshold* or indicator* or strateg* or criteri* or standard*)) and (therap* or transfus*)).mp. |  |
| 4 | ((H?emoglobin or h?emocrit or HB or HCT) adj5 (polic* or practic* or protocol* or trigger* or threshold* or indicator* or strateg* or criteri* or standard*)).mp.              |  |
| 5 | (transfus* adj5 (restrict* or liberal*)).mp.                                                                                                                                   |  |
| 6 | (blood transfus* adj3 (management or program*)).mp.                                                                                                                            |  |
| 7 | 1 or 2 or 3 or 4 or 5 or 6                                                                                                                                                     |  |
| 8 | limit 7 to yr="2017 -Current"                                                                                                                                                  |  |

**PICO 10: Restrictive vs. liberal plasma strategy in non-massive bleeding**

Update of Levy et al 2017 systematic review from June 2015 to September 4 2019

References uploaded =1564; duplicates removed = 180

**OVID Medline Epub Ahead of Print, In-Process & Other Non-Indexed Citations, Ovid MEDLINE(R) Daily and Ovid MEDLINE(R) 1946 to Present (Run September 4 2019)**

|   |                                                                                                                                                                                                                         |         |
|---|-------------------------------------------------------------------------------------------------------------------------------------------------------------------------------------------------------------------------|---------|
| 1 | Plasma/                                                                                                                                                                                                                 | 21662   |
| 2 | (fresh frozen plasma or liquid plasma or thawed plasma or freeze-dried plasma or methylene blue plasma or solvent-detergent plasma or amotosalen-treated plasma or riboflavin-treated plasma or therapeutic plasma).mp. | 7938    |
| 3 | 1 or 2                                                                                                                                                                                                                  | 27786   |
| 4 | ((randomized controlled trial or controlled clinical trial).pt. or randomized.ab. or placebo.ab. or drug therapy.fs. or randomly.ab. or trial.ab. or groups.ab.) not (animals not (humans and animals)).sh.             | 3908561 |
| 5 | 3 and 4                                                                                                                                                                                                                 | 4413    |
| 6 | limit 5 to yr="2015 -Current"                                                                                                                                                                                           | 1047    |

**Embase 1974 to 2019 September 03**

|   |                                                                                                                                                                                                                                                                                                                                                                                                                                                                                                         |        |
|---|---------------------------------------------------------------------------------------------------------------------------------------------------------------------------------------------------------------------------------------------------------------------------------------------------------------------------------------------------------------------------------------------------------------------------------------------------------------------------------------------------------|--------|
| 1 | exp plasma transfusion/                                                                                                                                                                                                                                                                                                                                                                                                                                                                                 | 4514   |
| 2 | (fresh frozen plasma or liquid plasma or thawed plasma or freeze-dried plasma or methylene blue plasma or solvent detergent plasma or amotosalen treated plasma or riboflavin treated plasma or therapeutic plasma).mp.                                                                                                                                                                                                                                                                                 | 22305  |
| 3 | 1 or 2                                                                                                                                                                                                                                                                                                                                                                                                                                                                                                  | 24998  |
| 4 | ('crossover procedure':de or 'double-blind procedure':de or 'randomized controlled trial':de or 'single-blind procedure':de).mp. or (((((((random* or factorial* or crossover* or cross) adj1 over*) or placebo* or doubl*) adj1 blind*) or singl*) adj1 blind*) or assign* or allocat* or volunteer*).de,ab,ti. [mp=title, abstract, heading word, drug trade name, original title, device manufacturer, drug manufacturer, device trade name, keyword, floating subheading word, candidate term word] | 934486 |
| 5 | 3 and 4                                                                                                                                                                                                                                                                                                                                                                                                                                                                                                 | 781    |
| 6 | limit 5 to yr="2015 -Current"                                                                                                                                                                                                                                                                                                                                                                                                                                                                           | 221    |

**EBM Reviews - Cochrane Central Register of Controlled Trials July 2019 (Run Sept. 4 2019)**

|   |                                                                                                                                                                                                                                                                                                     |     |
|---|-----------------------------------------------------------------------------------------------------------------------------------------------------------------------------------------------------------------------------------------------------------------------------------------------------|-----|
| 1 | (FRESH FROZEN PLASMA or liquid plasma or thawed plasma or freeze dried plasma or methylene blue plasma or solvent detergent plasma or amotosalen treated plasma or riboflavin treated plasma or therapeutic plasma).mp. [mp=title, original title, abstract, mesh headings, heading words, keyword] | 782 |
| 2 | limit 1 to yr="2015 -Current"                                                                                                                                                                                                                                                                       | 296 |



**PICO 12 & 13 (non-massive bleeding) - liberal vs. restrictive platelets (with or without thrombopathic TAR)**

*Updated systematic review by Kumar et al (2015)*

Total references=4808; duplicates removed = 369; removed during T&A screen = 4401

**OVID Medline Epub Ahead of Print, In-Process & Other Non-Indexed Citations, Ovid MEDLINE(R) Daily and Ovid MEDLINE(R) 1946 to Present (August 28 2019)**

|   |                                                                                                                     |         |
|---|---------------------------------------------------------------------------------------------------------------------|---------|
| 1 | blood transfusion.mp. or exp Blood Transfusion/ or transfus*.mp. or blood cells.mp. or exp Blood Cells/             | 1101952 |
| 2 | exp platelet count/ or platelet count.mp. or Platelet transfusion.mp. or exp Platelet Transfusion/ or platelet*.mp. | 269006  |
| 3 | (Therapeutic or therap*).mp.                                                                                        | 5834141 |
| 4 | (threshold* or trigger* or count or policy or adminis* or guideline* or dose or dosing or dosage or practice).mp.   | 5629308 |
| 5 | 1 and 2 and 3 and 4                                                                                                 | 15838   |
| 6 | limit 5 to (yr="2014 -Current" and "all adult (19 plus years)")                                                     | 1746    |

**Embase 1974 to 2019 August 27**

|   |                                                                                                                        |         |
|---|------------------------------------------------------------------------------------------------------------------------|---------|
| 1 | blood transfusion.ti,ab. or exp Blood Transfusion/ or transfus*.ti,ab. or blood cells.ti,ab. or exp Blood Cells/       | 1623271 |
| 2 | exp platelet count/ or platelet count.mp. or Platelet transfusion.mp. or exp Platelet Transfusion/ or platelet*.ti,ab. | 301287  |
| 3 | (Therapeutic or therap*).ti,ab.                                                                                        | 3721567 |
| 4 | (threshold* or trigger* or count or policy or adminis* or guideline* or dose or dosing or dosage or practice).ti,ab.   | 4905458 |
| 5 | 1 and 2 and 3 and 4                                                                                                    | 17096   |
| 6 | limit 5 to (yr="2014 -Current" and adult <18 to 64 years>)                                                             | 2769    |

**EBM Reviews - Cochrane Central Register of Controlled Trials July 2019**

exp platelet transfusion/ results 293
